# Supplementary material for: Absolute Quantification of Selected Proteins in the Human Osteoarthritic Secretome
Source: MDPI journal article supplement (doi:10.3390/ijms141020658), 2013-10-15
Supplement: s1 [file s1]

Supplementary Inforamtion

**Figure S1.** Validation of the human secretome QconCAT. (**A**) In-gel tryptic digestion of
the 13C6 lys/13C6 arg labelled QconCAT was analysed with MALDI to give a peptide
mass fingerprint of derived peptides. The most intense peptides are indicated as ringed with their respective peptide number. A number of peaks in the lower mass range were identified as matrix peaks; (**B**) Electrophorectic profile of a 5 μg aliquot of purified QconCAT; (**C**) Schematic representation of the organisation of peptides identified (blue) within the QconCAT.


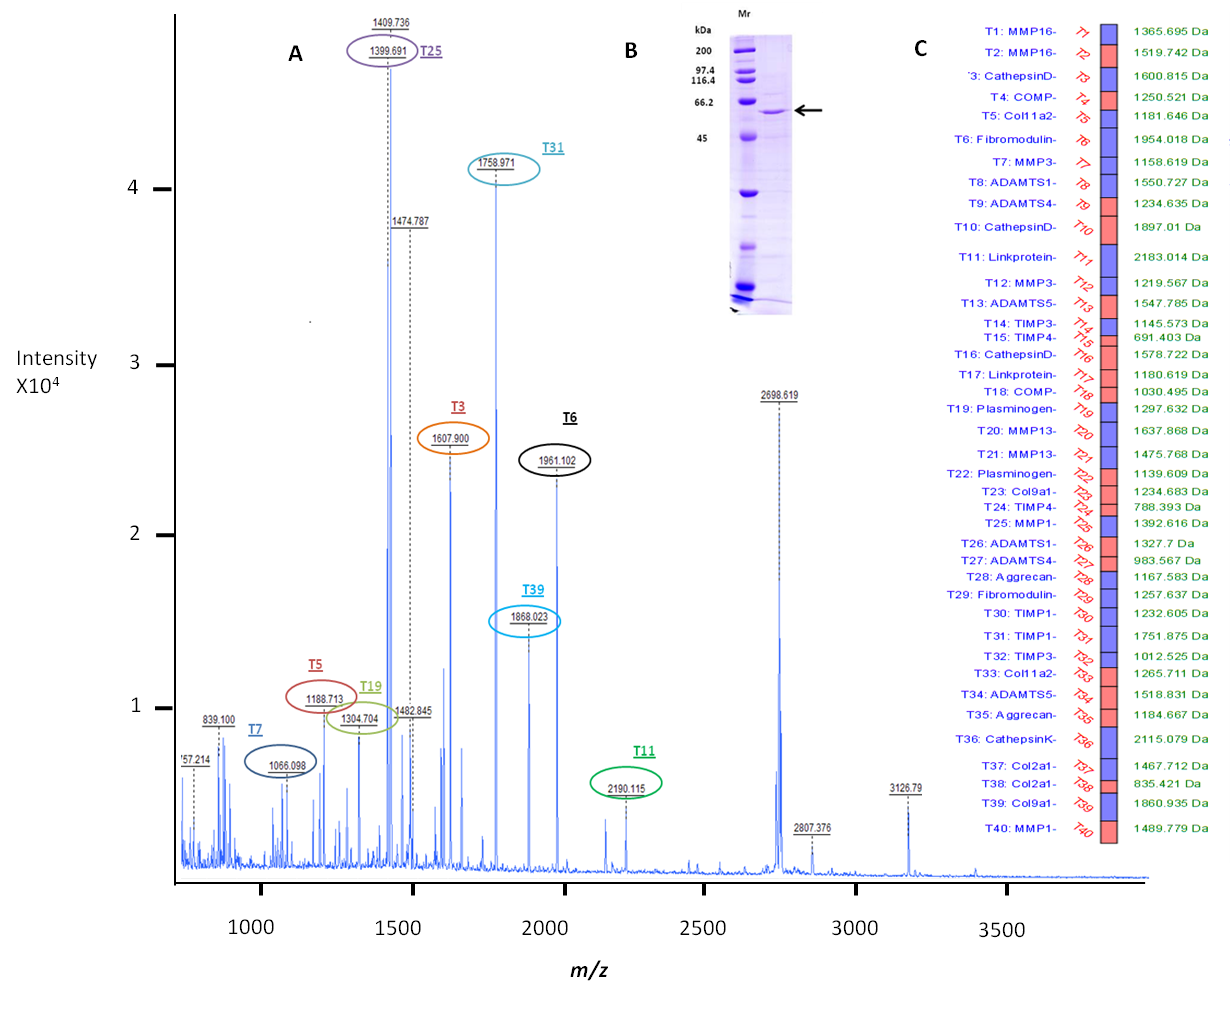


**Figure S2.** Linearity of response of using SRM quantification.Known ratios of heavy and light QconCAT proteins were mixed prior to proteolysis. The digests were then resolved by reversed phase LC-MS and the intensities of the ions corresponding to multiple peptides were measured. Data for three selected peptides, representative of all the peptides are shown.


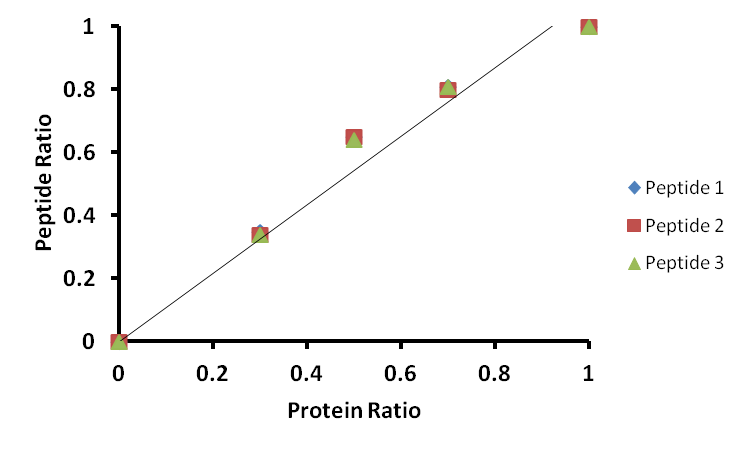


**Table S2.** Parameters used in SRM assays. The parent and fragment ion *m*/*z* and fragment type for peptides used to quantify the human OA secretome.

| **Protein** | **Peptide** | **Precursor *m/z*** | **Transition *m/z*** | **Fragment type** |
| --- | --- | --- | --- | --- |
| Aggrecan | EVVLLVATEGR | 593.3468 | 632.3362 | y6 |
| Aggrecan | EVVLLVATEGR | 593.3468 | 745.4176 | y7 |
| COMP | DTDLDGFPDEK | 626.2723 | 807.3456 | y7 |
| COMP | DTDLDGFPDEK | 626.2723 | 488.2318 | y4 |
| COMP | SSTGPGEQLR | 516.2594 | 699.376 | y6 |
| COMP | SSTGPGEQLR | 516.2594 | 756.3991 | y7 |
| Fibromodulin | IPPVNTNLENLYLQGNR | 652.353 | 750.3869 | y6 |
| MMP-1 | SQNPVQPIGPQTPK | 745.9028 | 837.4781 | y8 |
| MMP-1 | SQNPVQPIGPQTPK | 745.9037 | 1161.6524 | y11 |
| MMP-3 | IVNYTPDLPK | 580.3217 | 947.475 | y8 |
| MMP-3 | IVNYTPDLPK | 580.3217 | 569.3254 | y5 |
| Plasminogen | EAQLPVIENK | 570.8157 | 699.3985 | y6 |
| Plasminogen | EAQLPVIENK | 570.8168 | 812.4864 | y7 |
| TIMP-1 | GFQALGDAADIR | 617.3124 | 717.3489 | y7 |
| TIMP-1 | GFQALGDAADIR | 617.3124 | 901.4698 | y9 |

© 2013 by the authors; licensee MDPI, Basel, Switzerland. This article is an open access article distributed under the terms and conditions of the Creative Commons Attribution license (http://creativecommons.org/licenses/by/3.0/).
