# Supplementary material for: Absolute Quantification of Selected Proteins in the Human Osteoarthritic Secretome
Source: MDPI journal article supplement (doi:10.3390/ijms141020658), 2013-10-15
Supplement: s2 [file s2]

## Sheet: Sheet1
prot_hit_num	prot_acc	prot_desc	prot_score	prot_mass	prot_matches	prot_matches_sig	prot_sequences	prot_sequences_sig	pep_query	pep_rank	pep_isbold	pep_isunique	pep_exp_mz	pep_exp_mr	pep_exp_z	pep_calc_mr	pep_delta	pep_miss	pep_score	pep_expect	pep_res_before	pep_seq	pep_res_after	pep_var_mod	pep_var_mod_pos	pep_scan_title
1	P02751	Fibronectin OS=Homo sapiens GN=FN1 PE=1 SV=4	9998	266052	544	415	154	139	522	5	1	0	403.71	805.4	2	805.4	0	0	1.62	13	R	IGDTWSK	K			2_F80CXA20_1.9734.9734.2
1	P02751	Fibronectin OS=Homo sapiens GN=FN1 PE=1 SV=4	9998	266052	544	415	154	139	523	1	1	0	403.71	805.4	2	805.4	0	0	10.91	1.5	R	IGDTWSK	K			f69txa20.9558.9558.2
1	P02751	Fibronectin OS=Homo sapiens GN=FN1 PE=1 SV=4	9998	266052	544	415	154	139	524	2	1	0	403.71	805.4	2	805.4	0	0	3.72	7.8	R	IGDTWSK	K			f69cxa20.8577.8577.2
1	P02751	Fibronectin OS=Homo sapiens GN=FN1 PE=1 SV=4	9998	266052	544	415	154	139	525	1	1	0	403.71	805.4	2	805.4	0	0	6.57	4.1	R	IGDTWSK	K			f69cxa20_100930142853.8726.8726.2
1	P02751	Fibronectin OS=Homo sapiens GN=FN1 PE=1 SV=4	9998	266052	544	415	154	139	526	2	1	0	403.71	805.4	2	805.4	0	0	2.17	11	R	IGDTWSK	K			2_F80TXA20.99.99.2
1	P02751	Fibronectin OS=Homo sapiens GN=FN1 PE=1 SV=4	9998	266052	544	415	154	139	527	2	1	0	403.71	805.4	2	805.4	0	0	0.98	15	R	IGDTWSK	K			2_F80CXA20_2.98.98.2
1	P02751	Fibronectin OS=Homo sapiens GN=FN1 PE=1 SV=4	9998	266052	544	415	154	139	528	1	1	0	403.71	805.4	2	805.4	0	0	11.89	1.3	R	IGDTWSK	K			f69cxb20_100930171645.8903.8903.2
1	P02751	Fibronectin OS=Homo sapiens GN=FN1 PE=1 SV=4	9998	266052	544	415	154	139	529	1	1	0	403.71	805.4	2	805.4	0	0	11.84	1.3	R	IGDTWSK	K			f69cxa20.8762.8762.2
1	P02751	Fibronectin OS=Homo sapiens GN=FN1 PE=1 SV=4	9998	266052	544	415	154	139	530	1	1	0	403.71	805.4	2	805.4	0	0	46.43	0.00045	R	IGDTWSK	K			F80CXA20_2.3146.3146.2
1	P02751	Fibronectin OS=Homo sapiens GN=FN1 PE=1 SV=4	9998	266052	544	415	154	139	531	1	1	0	403.71	805.4	2	805.4	0	0	40.09	0.0019	R	IGDTWSK	K			2_F80CXA20_2.3181.3181.2
1	P02751	Fibronectin OS=Homo sapiens GN=FN1 PE=1 SV=4	9998	266052	544	415	154	139	543	1	1	0	404.25	806.49	2	806.49	0	0	35.6	0.00067	R	ITGYIIK	Y			F80TXA20.4448.4448.2
1	P02751	Fibronectin OS=Homo sapiens GN=FN1 PE=1 SV=4	9998	266052	544	415	154	139	544	1	1	0	404.25	806.49	2	806.49	0	0	27.12	0.0048	R	ITGYIIK	Y			F80CXA20_2.4448.4448.2
1	P02751	Fibronectin OS=Homo sapiens GN=FN1 PE=1 SV=4	9998	266052	544	415	154	139	549	1	1	0	404.72	807.42	2	807.42	0	0	28.59	0.025	R	AQITGYR	L			F80CXA20_1.2689.2689.2
1	P02751	Fibronectin OS=Homo sapiens GN=FN1 PE=1 SV=4	9998	266052	544	415	154	139	550	1	1	0	404.72	807.42	2	807.42	0	0	28.69	0.025	R	AQITGYR	L			2_F80CXA20_2.2693.2693.2
1	P02751	Fibronectin OS=Homo sapiens GN=FN1 PE=1 SV=4	9998	266052	544	415	154	139	690	1	1	0	414.75	827.49	2	827.49	0	0	29.27	0.013	R	TIKPDVR	S			f69cxb20.1987.1987.2
1	P02751	Fibronectin OS=Homo sapiens GN=FN1 PE=1 SV=4	9998	266052	544	415	154	139	691	1	1	0	414.75	827.49	2	827.49	0	0	26.65	0.025	R	TIKPDVR	S			f69txb20.1843.1843.2
1	P02751	Fibronectin OS=Homo sapiens GN=FN1 PE=1 SV=4	9998	266052	544	415	154	139	918	1	1	0	429.72	857.42	2	857.42	0	0	35.35	0.0038	R	SDTVPSPR	D			f69txa20.2138.2138.2
1	P02751	Fibronectin OS=Homo sapiens GN=FN1 PE=1 SV=4	9998	266052	544	415	154	139	919	1	1	0	429.72	857.42	2	857.42	0	0	38.18	0.002	R	SDTVPSPR	D			f69cxb20.2153.2153.2
1	P02751	Fibronectin OS=Homo sapiens GN=FN1 PE=1 SV=4	9998	266052	544	415	154	139	1024	1	1	0	436.74	871.47	2	871.47	0	0	41.73	0.00087	K	VFAVSHGR	E			2_F80CXA20_1.2519.2519.2
1	P02751	Fibronectin OS=Homo sapiens GN=FN1 PE=1 SV=4	9998	266052	544	415	154	139	1025	1	1	0	436.74	871.47	2	871.47	0	0	51.74	8.7e-05	K	VFAVSHGR	E			F80CXA20_1.2520.2520.2
1	P02751	Fibronectin OS=Homo sapiens GN=FN1 PE=1 SV=4	9998	266052	544	415	154	139	1042	1	1	0	437.71	873.4	2	873.4	0	0	10.28	0.62	K	YTGNTYR	V			f69cxa20.1538.1538.2
1	P02751	Fibronectin OS=Homo sapiens GN=FN1 PE=1 SV=4	9998	266052	544	415	154	139	1043	1	1	0	437.71	873.4	2	873.4	0	0	7.09	1.3	K	YTGNTYR	V			2_F80TXB20.1812.1812.2
1	P02751	Fibronectin OS=Homo sapiens GN=FN1 PE=1 SV=4	9998	266052	544	415	154	139	1200	1	1	0	450.27	898.52	2	898.52	0	1	23.8	0.045	K	SEPLIGRK	K			2_F80TXA20.2694.2694.2
1	P02751	Fibronectin OS=Homo sapiens GN=FN1 PE=1 SV=4	9998	266052	544	415	154	139	1201	1	1	0	450.27	898.52	2	898.52	0	1	19.77	0.11	K	SEPLIGRK	K			m84cxa20.2538.2538.2
1	P02751	Fibronectin OS=Homo sapiens GN=FN1 PE=1 SV=4	9998	266052	544	415	154	139	1234	1	1	0	452.24	902.46	2	902.46	0	1	42.39	0.00084	K	IGEKWDR	Q			f69cxb20_100930171645.2450.2450.2
1	P02751	Fibronectin OS=Homo sapiens GN=FN1 PE=1 SV=4	9998	266052	544	415	154	139	1235	1	1	0	452.24	902.46	2	902.46	0	1	35.05	0.0045	K	IGEKWDR	Q			m84cxb20.2302.2302.2
1	P02751	Fibronectin OS=Homo sapiens GN=FN1 PE=1 SV=4	9998	266052	544	415	154	139	1307	3	1	0	458.29	914.57	2	914.57	0	1	8.01	0.55	R	LTVGLTRR	G			2_F80TXB20.3360.3360.2
1	P02751	Fibronectin OS=Homo sapiens GN=FN1 PE=1 SV=4	9998	266052	544	415	154	139	1308	2	1	0	458.29	914.57	2	914.57	0	1	8.53	0.48	R	LTVGLTRR	G			F80CXA20_2.3417.3417.2
1	P02751	Fibronectin OS=Homo sapiens GN=FN1 PE=1 SV=4	9998	266052	544	415	154	139	1309	3	1	0	458.29	914.57	2	914.57	0	1	6.85	0.48	R	LTVGLTRR	G			2_F80TXA20.3672.3672.2
1	P02751	Fibronectin OS=Homo sapiens GN=FN1 PE=1 SV=4	9998	266052	544	415	154	139	1363	1	1	0	462.2	922.38	2	922.37	0	0	18.87	0.037	R	CTCVGNGR	G			m84cxa20.1442.1442.2
1	P02751	Fibronectin OS=Homo sapiens GN=FN1 PE=1 SV=4	9998	266052	544	415	154	139	1449	1	1	0	467.74	933.47	2	933.47	0	0	58.6	3.3e-05	R	ISCTIANR	C			2_F80CXA20_2.2673.2673.2
1	P02751	Fibronectin OS=Homo sapiens GN=FN1 PE=1 SV=4	9998	266052	544	415	154	139	1450	1	1	0	467.74	933.47	2	933.47	0	0	50.5	0.00021	R	ISCTIANR	C			m84cxa20.2532.2532.2
1	P02751	Fibronectin OS=Homo sapiens GN=FN1 PE=1 SV=4	9998	266052	544	415	154	139	1953	1	1	0	498.25	994.49	2	994.49	0	1	21.98	0.087	R	EDRVPHSR	N			f69cxb20_100930171645.1337.1337.2
1	P02751	Fibronectin OS=Homo sapiens GN=FN1 PE=1 SV=4	9998	266052	544	415	154	139	1954	1	1	0	498.25	994.49	2	994.49	0	1	17.61	0.24	R	EDRVPHSR	N			m84cxa20.1353.1353.2
1	P02751	Fibronectin OS=Homo sapiens GN=FN1 PE=1 SV=4	9998	266052	544	415	154	139	2251	1	1	0	515.77	1029.53	2	1029.52	0	0	28.21	0.036	K	YEKPGSPPR	E			F80TXA20.1766.1766.2
1	P02751	Fibronectin OS=Homo sapiens GN=FN1 PE=1 SV=4	9998	266052	544	415	154	139	2252	1	1	0	515.77	1029.53	2	1029.52	0	0	31.58	0.016	K	YEKPGSPPR	E			m84cxb20.1539.1539.2
1	P02751	Fibronectin OS=Homo sapiens GN=FN1 PE=1 SV=4	9998	266052	544	415	154	139	2537	1	1	0	532.77	1063.53	2	1063.53	0	0	38.71	0.0023	R	VGDTYERPK	D			f69cxb20_100930171645.1826.1826.2
1	P02751	Fibronectin OS=Homo sapiens GN=FN1 PE=1 SV=4	9998	266052	544	415	154	139	2538	1	1	0	532.77	1063.53	2	1063.53	0	0	44.48	0.00061	R	VGDTYERPK	D			2_F80CXA20_1.1936.1936.2
1	P02751	Fibronectin OS=Homo sapiens GN=FN1 PE=1 SV=4	9998	266052	544	415	154	139	2543	1	1	0	533.22	1064.43	2	1064.43	0	0	42	0.00019	R	CHEGGQSYK	I			f69cxb20_100930171645.1260.1260.2
1	P02751	Fibronectin OS=Homo sapiens GN=FN1 PE=1 SV=4	9998	266052	544	415	154	139	2544	1	1	0	533.22	1064.43	2	1064.43	0	0	26.09	0.0074	R	CHEGGQSYK	I			F80TXA20.1113.1113.2
1	P02751	Fibronectin OS=Homo sapiens GN=FN1 PE=1 SV=4	9998	266052	544	415	154	139	2601	1	1	0	536.29	1070.57	2	1070.56	0	0	30.48	0.014	K	YEVSVYALK	D			f69txb20.4653.4653.2
1	P02751	Fibronectin OS=Homo sapiens GN=FN1 PE=1 SV=4	9998	266052	544	415	154	139	2602	1	1	0	536.29	1070.57	2	1070.56	0	0	34.25	0.0058	K	YEVSVYALK	D			m84txb20.4695.4695.2
1	P02751	Fibronectin OS=Homo sapiens GN=FN1 PE=1 SV=4	9998	266052	544	415	154	139	2672	1	1	0	539.78	1077.54	2	1077.55	0	0	38.66	0.0032	R	QYNVGPSVSK	Y			2_F80CXA20_1.3008.3008.2
1	P02751	Fibronectin OS=Homo sapiens GN=FN1 PE=1 SV=4	9998	266052	544	415	154	139	2673	1	1	0	539.78	1077.54	2	1077.55	0	0	28.52	0.033	R	QYNVGPSVSK	Y			F80CXA20_1.3011.3011.2
1	P02751	Fibronectin OS=Homo sapiens GN=FN1 PE=1 SV=4	9998	266052	544	415	154	139	2958	1	1	0	555.77	1109.54	2	1109.54	0	0	32.61	0.006	R	STTPDITGYR	I			f69cxb20_100930171645.3447.3447.2
1	P02751	Fibronectin OS=Homo sapiens GN=FN1 PE=1 SV=4	9998	266052	544	415	154	139	2959	1	1	0	555.77	1109.54	2	1109.54	0	0	39.45	0.0012	R	STTPDITGYR	I			m84txa20.3405.3405.2
1	P02751	Fibronectin OS=Homo sapiens GN=FN1 PE=1 SV=4	9998	266052	544	415	154	139	3076	1	1	0	562.23	1122.45	2	1122.44	0	1	14.34	0.048	R	GWRCDNCR	R			2_F80CXA20_1.2003.2003.2
1	P02751	Fibronectin OS=Homo sapiens GN=FN1 PE=1 SV=4	9998	266052	544	415	154	139	3077	1	1	0	562.23	1122.45	2	1122.44	0	1	18.07	0.02	R	GWRCDNCR	R			F80CXA20_1.1963.1963.2
1	P02751	Fibronectin OS=Homo sapiens GN=FN1 PE=1 SV=4	9998	266052	544	415	154	139	3255	1	1	0	571.74	1141.46	2	1141.46	0	0	18.61	0.026	K	QHDMGHMMR	C			2_F80TXA20.2307.2307.2
1	P02751	Fibronectin OS=Homo sapiens GN=FN1 PE=1 SV=4	9998	266052	544	415	154	139	3256	1	1	0	571.74	1141.46	2	1141.46	0	0	19.16	0.023	K	QHDMGHMMR	C			f69cxb20.2074.2074.2
1	P02751	Fibronectin OS=Homo sapiens GN=FN1 PE=1 SV=4	9998	266052	544	415	154	139	3302	1	1	0	574.3	1146.59	2	1146.59	0	1	36.19	0.0053	R	GRISCTIANR	C			2_F80TXA20.2622.2622.2
1	P02751	Fibronectin OS=Homo sapiens GN=FN1 PE=1 SV=4	9998	266052	544	415	154	139	3303	1	1	0	574.3	1146.59	2	1146.59	0	1	28.66	0.03	R	GRISCTIANR	C			f69cxb20.2317.2317.2
1	P02751	Fibronectin OS=Homo sapiens GN=FN1 PE=1 SV=4	9998	266052	544	415	154	139	3489	1	1	0	585.23	1168.44	2	1168.44	0	0	36.91	0.00031	R	YQCYCYGR	G			f69cxa20.2498.2498.2
1	P02751	Fibronectin OS=Homo sapiens GN=FN1 PE=1 SV=4	9998	266052	544	415	154	139	3490	1	1	0	585.23	1168.44	2	1168.44	0	0	34.4	0.00054	R	YQCYCYGR	G			2_F80TXA20.3033.3033.2
1	P02751	Fibronectin OS=Homo sapiens GN=FN1 PE=1 SV=4	9998	266052	544	415	154	139	4072	1	1	0	611.26	1220.51	2	1220.51	0	0	63.42	1.5e-06	R	TFYSCTTEGR	Q			F80TXB20.3251.3251.2
1	P02751	Fibronectin OS=Homo sapiens GN=FN1 PE=1 SV=4	9998	266052	544	415	154	139	4073	1	1	0	611.26	1220.51	2	1220.51	0	0	47.6	5.8e-05	R	TFYSCTTEGR	Q			F80CXA20_2.3252.3252.2
1	P02751	Fibronectin OS=Homo sapiens GN=FN1 PE=1 SV=4	9998	266052	544	415	154	139	4466	1	1	0	419.23	1254.67	3	1254.67	0	1	33.8	0.0054	K	NNQKSEPLIGR	K			F80CXA20_2.2881.2881.3
1	P02751	Fibronectin OS=Homo sapiens GN=FN1 PE=1 SV=4	9998	266052	544	415	154	139	4467	1	1	0	419.23	1254.67	3	1254.67	0	1	27.81	0.022	K	NNQKSEPLIGR	K			2_F80TXA20.2955.2955.3
1	P02751	Fibronectin OS=Homo sapiens GN=FN1 PE=1 SV=4	9998	266052	544	415	154	139	4468	1	1	0	628.34	1254.67	2	1254.67	0	1	43.2	0.00065	K	NNQKSEPLIGR	K			f69cxb20.2597.2597.2
1	P02751	Fibronectin OS=Homo sapiens GN=FN1 PE=1 SV=4	9998	266052	544	415	154	139	4469	1	1	0	628.34	1254.67	2	1254.67	0	1	29.71	0.015	K	NNQKSEPLIGR	K			m84txb20.2483.2483.2
1	P02751	Fibronectin OS=Homo sapiens GN=FN1 PE=1 SV=4	9998	266052	544	415	154	139	4664	1	1	0	638.31	1274.6	2	1274.6	0	0	29.46	0.011	K	TYHVGEQWQK	E			2_F80TXA20.3418.3418.2
1	P02751	Fibronectin OS=Homo sapiens GN=FN1 PE=1 SV=4	9998	266052	544	415	154	139	4665	1	1	0	638.31	1274.6	2	1274.6	0	0	28.55	0.014	K	TYHVGEQWQK	E			m84txa20.2960.2960.2
1	P02751	Fibronectin OS=Homo sapiens GN=FN1 PE=1 SV=4	9998	266052	544	415	154	139	4666	1	1	0	425.88	1274.6	3	1274.6	0	0	36.19	0.0024	K	TYHVGEQWQK	E			F80CXA20_2.3352.3352.3
1	P02751	Fibronectin OS=Homo sapiens GN=FN1 PE=1 SV=4	9998	266052	544	415	154	139	4667	1	1	0	425.88	1274.6	3	1274.6	0	0	33.37	0.0046	K	TYHVGEQWQK	E			2_F80TXB20.3285.3285.3
1	P02751	Fibronectin OS=Homo sapiens GN=FN1 PE=1 SV=4	9998	266052	544	415	154	139	4889	1	1	0	431.52	1291.54	3	1291.54	0	0	25.48	0.013	R	WCHDNGVNYK	I			F80TXB20.2679.2679.3
1	P02751	Fibronectin OS=Homo sapiens GN=FN1 PE=1 SV=4	9998	266052	544	415	154	139	4890	1	1	0	431.52	1291.54	3	1291.54	0	0	27.26	0.0088	R	WCHDNGVNYK	I			2_F80CXA20_2.2719.2719.3
1	P02751	Fibronectin OS=Homo sapiens GN=FN1 PE=1 SV=4	9998	266052	544	415	154	139	4891	1	1	0	646.78	1291.54	2	1291.54	0	0	48.35	7.5e-05	R	WCHDNGVNYK	I			2_F80TXA20.2750.2750.2
1	P02751	Fibronectin OS=Homo sapiens GN=FN1 PE=1 SV=4	9998	266052	544	415	154	139	4892	1	1	0	646.78	1291.54	2	1291.54	0	0	50.18	4.9e-05	R	WCHDNGVNYK	I			f69cxa20.2254.2254.2
1	P02751	Fibronectin OS=Homo sapiens GN=FN1 PE=1 SV=4	9998	266052	544	415	154	139	4898	1	1	0	646.84	1291.67	2	1291.67	0	0	66.54	4.5e-06	R	DLQFVEVTDVK	V			f69cxb20_100930171645.5600.5600.2
1	P02751	Fibronectin OS=Homo sapiens GN=FN1 PE=1 SV=4	9998	266052	544	415	154	139	4899	1	1	0	646.84	1291.67	2	1291.67	0	0	68.02	3.2e-06	R	DLQFVEVTDVK	V			m84txa20.5545.5545.2
1	P02751	Fibronectin OS=Homo sapiens GN=FN1 PE=1 SV=4	9998	266052	544	415	154	139	5119	1	1	0	656.37	1310.73	2	1310.73	0	1	8.23	1.3	R	RTTPPTTATPIR	H			2_F80TXA20.2887.2887.2
1	P02751	Fibronectin OS=Homo sapiens GN=FN1 PE=1 SV=4	9998	266052	544	415	154	139	5217	1	1	0	440.22	1317.64	3	1317.64	0	0	31.8	0.011	K	GEWTCKPIAEK	C			2_F80CXA20_1.3320.3320.3
1	P02751	Fibronectin OS=Homo sapiens GN=FN1 PE=1 SV=4	9998	266052	544	415	154	139	5218	1	1	0	440.22	1317.64	3	1317.64	0	0	32.89	0.0084	K	GEWTCKPIAEK	C			f69cxa20_100930142853.2830.2830.3
1	P02751	Fibronectin OS=Homo sapiens GN=FN1 PE=1 SV=4	9998	266052	544	415	154	139	5219	1	1	0	659.83	1317.64	2	1317.64	0	0	46.46	0.00038	K	GEWTCKPIAEK	C			2_F80CXA20_2.3328.3328.2
1	P02751	Fibronectin OS=Homo sapiens GN=FN1 PE=1 SV=4	9998	266052	544	415	154	139	5220	1	1	0	659.83	1317.64	2	1317.64	0	0	38.06	0.0026	K	GEWTCKPIAEK	C			2_F80TXA20.3364.3364.2
1	P02751	Fibronectin OS=Homo sapiens GN=FN1 PE=1 SV=4	9998	266052	544	415	154	139	5281	1	1	0	441.91	1322.71	3	1322.71	0	0	49.24	0.00015	K	LGVRPSQGGEAPR	E			m84txa20.2199.2199.3
1	P02751	Fibronectin OS=Homo sapiens GN=FN1 PE=1 SV=4	9998	266052	544	415	154	139	5282	1	1	0	441.91	1322.71	3	1322.71	0	0	41.9	0.00084	K	LGVRPSQGGEAPR	E			2_F80CXA20_1.2479.2479.3
1	P02751	Fibronectin OS=Homo sapiens GN=FN1 PE=1 SV=4	9998	266052	544	415	154	139	5283	1	1	0	662.36	1322.71	2	1322.71	0	0	31.08	0.01	K	LGVRPSQGGEAPR	E			f69txa20.2201.2201.2
1	P02751	Fibronectin OS=Homo sapiens GN=FN1 PE=1 SV=4	9998	266052	544	415	154	139	5284	1	1	0	662.36	1322.71	2	1322.71	0	0	49.45	0.00015	K	LGVRPSQGGEAPR	E			m84cxb20.2039.2039.2
1	P02751	Fibronectin OS=Homo sapiens GN=FN1 PE=1 SV=4	9998	266052	544	415	154	139	5381	1	1	0	444.58	1330.71	3	1330.71	0	0	17.9	0.28	R	ESKPLTAQQTTK	L			F80CXA20_1.1797.1797.3
1	P02751	Fibronectin OS=Homo sapiens GN=FN1 PE=1 SV=4	9998	266052	544	415	154	139	5382	1	1	0	444.58	1330.71	3	1330.71	0	0	30.4	0.016	R	ESKPLTAQQTTK	L			2_F80TXA20.1837.1837.3
1	P02751	Fibronectin OS=Homo sapiens GN=FN1 PE=1 SV=4	9998	266052	544	415	154	139	5383	1	1	0	666.36	1330.71	2	1330.71	0	0	29.08	0.021	R	ESKPLTAQQTTK	L			2_F80TXA20.1836.1836.2
1	P02751	Fibronectin OS=Homo sapiens GN=FN1 PE=1 SV=4	9998	266052	544	415	154	139	5384	1	1	0	666.36	1330.71	2	1330.71	0	0	48.16	0.00026	R	ESKPLTAQQTTK	L			f69cxb20_100930171645.1672.1672.2
1	P02751	Fibronectin OS=Homo sapiens GN=FN1 PE=1 SV=4	9998	266052	544	415	154	139	5491	1	1	0	447.9	1340.67	3	1340.67	0	1	38.68	0.0022	R	DGQERDAPIVNK	V			f69cxb20_100930171645.2146.2146.3
1	P02751	Fibronectin OS=Homo sapiens GN=FN1 PE=1 SV=4	9998	266052	544	415	154	139	5492	1	1	0	447.9	1340.67	3	1340.67	0	1	33.51	0.0074	R	DGQERDAPIVNK	V			f69txa20.2160.2160.3
1	P02751	Fibronectin OS=Homo sapiens GN=FN1 PE=1 SV=4	9998	266052	544	415	154	139	5493	1	1	0	671.34	1340.67	2	1340.67	0	1	25.86	0.043	R	DGQERDAPIVNK	V			f69cxb20.2193.2193.2
1	P02751	Fibronectin OS=Homo sapiens GN=FN1 PE=1 SV=4	9998	266052	544	415	154	139	5494	1	1	0	671.34	1340.67	2	1340.67	0	1	18.99	0.21	R	DGQERDAPIVNK	V			f69cxa20.1995.1995.2
1	P02751	Fibronectin OS=Homo sapiens GN=FN1 PE=1 SV=4	9998	266052	544	415	154	139	5495	4	1	0	671.34	1340.67	2	1340.67	0.01	1	5.76	4.9	R	DGQERDAPIVNK	V			2_F80TXB20.6614.6614.2
1	P02751	Fibronectin OS=Homo sapiens GN=FN1 PE=1 SV=4	9998	266052	544	415	154	139	5496	2	1	0	671.34	1340.67	2	1340.67	0.01	1	4.14	7.1	R	DGQERDAPIVNK	V			2_F80CXA20_2.6689.6689.2
1	P02751	Fibronectin OS=Homo sapiens GN=FN1 PE=1 SV=4	9998	266052	544	415	154	139	5619	1	1	0	675.35	1348.68	2	1348.68	0	0	32.29	0.012	K	WLPSSSPVTGYR	V			f69cxb20.4838.4838.2
1	P02751	Fibronectin OS=Homo sapiens GN=FN1 PE=1 SV=4	9998	266052	544	415	154	139	5620	1	1	0	675.35	1348.68	2	1348.68	0	0	40.43	0.0018	K	WLPSSSPVTGYR	V			f69cxa20_100930142853.4793.4793.2
1	P02751	Fibronectin OS=Homo sapiens GN=FN1 PE=1 SV=4	9998	266052	544	415	154	139	5701	1	1	0	678.35	1354.69	2	1354.69	0	0	30.56	0.012	K	IYLYTLNDNAR	S			F80TXB20.8830.8830.2
1	P02751	Fibronectin OS=Homo sapiens GN=FN1 PE=1 SV=4	9998	266052	544	415	154	139	5702	1	1	0	678.35	1354.69	2	1354.69	0	0	34.09	0.0054	K	IYLYTLNDNAR	S			f69cxa20_100930142853.8059.8059.2
1	P02751	Fibronectin OS=Homo sapiens GN=FN1 PE=1 SV=4	9998	266052	544	415	154	139	5703	1	1	0	678.35	1354.69	2	1354.69	0	0	46.14	0.00037	K	IYLYTLNDNAR	S			f69txb20.4977.4977.2
1	P02751	Fibronectin OS=Homo sapiens GN=FN1 PE=1 SV=4	9998	266052	544	415	154	139	5704	1	1	0	678.35	1354.69	2	1354.69	0	0	58.8	2e-05	K	IYLYTLNDNAR	S			m84txb20.5009.5009.2
1	P02751	Fibronectin OS=Homo sapiens GN=FN1 PE=1 SV=4	9998	266052	544	415	154	139	5716	1	1	0	678.84	1355.66	2	1355.66	0	0	20.74	0.098	R	HHPEHFSGRPR	E			2_F80TXB20.1486.1486.2
1	P02751	Fibronectin OS=Homo sapiens GN=FN1 PE=1 SV=4	9998	266052	544	415	154	139	5717	1	1	0	678.84	1355.66	2	1355.66	0	0	12.88	0.6	R	HHPEHFSGRPR	E			F80TXB20.1505.1505.2
1	P02751	Fibronectin OS=Homo sapiens GN=FN1 PE=1 SV=4	9998	266052	544	415	154	139	5718	1	1	0	452.89	1355.66	3	1355.66	0	0	15.03	0.39	R	HHPEHFSGRPR	E			F80TXB20.1490.1490.3
1	P02751	Fibronectin OS=Homo sapiens GN=FN1 PE=1 SV=4	9998	266052	544	415	154	139	5719	1	1	0	452.89	1355.66	3	1355.66	0	0	5.29	3.6	R	HHPEHFSGRPR	E			F80TXA20.1392.1392.3
1	P02751	Fibronectin OS=Homo sapiens GN=FN1 PE=1 SV=4	9998	266052	544	415	154	139	5734	1	1	0	679.35	1356.68	2	1356.68	0	0	4.49	5.8	K	IAWESPQGQVSR	Y			m84txb20.3858.3858.2
1	P02751	Fibronectin OS=Homo sapiens GN=FN1 PE=1 SV=4	9998	266052	544	415	154	139	6002	1	1	0	690.36	1378.7	2	1378.7	0	0	63.4	8.6e-06	K	GLAFTDVDVDSIK	I			F80CXA20_1.6472.6472.2
1	P02751	Fibronectin OS=Homo sapiens GN=FN1 PE=1 SV=4	9998	266052	544	415	154	139	6003	1	1	0	690.36	1378.7	2	1378.7	0	0	64.2	7.2e-06	K	GLAFTDVDVDSIK	I			f69cxa20_100930142853.5835.5835.2
1	P02751	Fibronectin OS=Homo sapiens GN=FN1 PE=1 SV=4	9998	266052	544	415	154	139	6271	1	1	0	467.89	1400.66	3	1400.66	0	0	40.99	0.00088	K	HYQINQQWER	T			m84txb20.3210.3210.3
1	P02751	Fibronectin OS=Homo sapiens GN=FN1 PE=1 SV=4	9998	266052	544	415	154	139	6272	1	1	0	467.89	1400.66	3	1400.66	0	0	44.81	0.00036	K	HYQINQQWER	T			2_F80TXB20.3658.3658.3
1	P02751	Fibronectin OS=Homo sapiens GN=FN1 PE=1 SV=4	9998	266052	544	415	154	139	6273	1	1	0	701.34	1400.66	2	1400.66	0	0	35.34	0.0032	K	HYQINQQWER	T			m84txb20.3207.3207.2
1	P02751	Fibronectin OS=Homo sapiens GN=FN1 PE=1 SV=4	9998	266052	544	415	154	139	6274	1	1	0	701.34	1400.66	2	1400.66	0	0	36.09	0.0027	K	HYQINQQWER	T			f69cxb20_100930171645.3292.3292.2
1	P02751	Fibronectin OS=Homo sapiens GN=FN1 PE=1 SV=4	9998	266052	544	415	154	139	6389	1	1	0	472.54	1414.59	3	1414.59	0	1	1.48	3.6	R	CNDQDTRTSYR	I			F80TXA20.1568.1568.3
1	P02751	Fibronectin OS=Homo sapiens GN=FN1 PE=1 SV=4	9998	266052	544	415	154	139	6390	1	1	0	472.54	1414.59	3	1414.59	0	1	25.41	0.014	R	CNDQDTRTSYR	I			2_F80CXA20_2.1700.1700.3
1	P02751	Fibronectin OS=Homo sapiens GN=FN1 PE=1 SV=4	9998	266052	544	415	154	139	6391	1	1	0	708.3	1414.59	2	1414.59	0	1	23	0.027	R	CNDQDTRTSYR	I			F80CXA20_2.1647.1647.2
1	P02751	Fibronectin OS=Homo sapiens GN=FN1 PE=1 SV=4	9998	266052	544	415	154	139	6392	1	1	0	708.3	1414.59	2	1414.59	0	1	21.19	0.041	R	CNDQDTRTSYR	I			F80CXA20_1.1656.1656.2
1	P02751	Fibronectin OS=Homo sapiens GN=FN1 PE=1 SV=4	9998	266052	544	415	154	139	6571	1	1	0	477.92	1430.74	3	1430.74	0	0	38.66	0.0026	R	WSRPQAPITGYR	I			m84cxa20.3980.3980.3
1	P02751	Fibronectin OS=Homo sapiens GN=FN1 PE=1 SV=4	9998	266052	544	415	154	139	6572	1	1	0	477.92	1430.74	3	1430.74	0	0	21.14	0.15	R	WSRPQAPITGYR	I			m84txb20.3600.3600.3
1	P02751	Fibronectin OS=Homo sapiens GN=FN1 PE=1 SV=4	9998	266052	544	415	154	139	6574	1	1	0	716.38	1430.74	2	1430.74	0	0	24.06	0.076	R	WSRPQAPITGYR	I			F80TXA20.4158.4158.2
1	P02751	Fibronectin OS=Homo sapiens GN=FN1 PE=1 SV=4	9998	266052	544	415	154	139	6877	1	1	0	731.4	1460.78	2	1460.78	0	0	67.7	1.8e-06	R	VPGTSTSATLTGLTR	G			f69cxb20.4382.4382.2
1	P02751	Fibronectin OS=Homo sapiens GN=FN1 PE=1 SV=4	9998	266052	544	415	154	139	6878	1	1	0	731.4	1460.78	2	1460.78	0	0	79.78	1.1e-07	R	VPGTSTSATLTGLTR	G			f69txb20.4125.4125.2
1	P02751	Fibronectin OS=Homo sapiens GN=FN1 PE=1 SV=4	9998	266052	544	415	154	139	6881	1	1	0	731.85	1461.68	2	1461.68	0	0	50.77	9.7e-05	R	GNLLQCICTGNGR	G			2_F80CXA20_1.5532.5532.2
1	P02751	Fibronectin OS=Homo sapiens GN=FN1 PE=1 SV=4	9998	266052	544	415	154	139	6882	1	1	0	731.85	1461.68	2	1461.68	0	0	49.47	0.00013	R	GNLLQCICTGNGR	G			f69cxa20.4900.4900.2
1	P02751	Fibronectin OS=Homo sapiens GN=FN1 PE=1 SV=4	9998	266052	544	415	154	139	6883	1	1	0	488.24	1461.69	3	1461.68	0.01	0	32.34	0.0083	R	GNLLQCICTGNGR	G			F80TXB20.5526.5526.3
1	P02751	Fibronectin OS=Homo sapiens GN=FN1 PE=1 SV=4	9998	266052	544	415	154	139	6884	1	1	0	488.24	1461.69	3	1461.68	0.01	0	27.42	0.026	R	GNLLQCICTGNGR	G			F80CXA20_2.5522.5522.3
1	P02751	Fibronectin OS=Homo sapiens GN=FN1 PE=1 SV=4	9998	266052	544	415	154	139	7084	1	1	0	495.24	1482.69	3	1482.69	0	0	41.69	0.00077	R	GEWTCIAYSQLR	D			2_F80CXA20_2.6012.6012.3
1	P02751	Fibronectin OS=Homo sapiens GN=FN1 PE=1 SV=4	9998	266052	544	415	154	139	7085	1	1	0	495.24	1482.69	3	1482.69	0	0	35.3	0.0033	R	GEWTCIAYSQLR	D			m84cxa20.5760.5760.3
1	P02751	Fibronectin OS=Homo sapiens GN=FN1 PE=1 SV=4	9998	266052	544	415	154	139	7086	1	1	0	742.35	1482.69	2	1482.69	0	0	64.46	4.1e-06	R	GEWTCIAYSQLR	D			F80CXA20_2.5971.5971.2
1	P02751	Fibronectin OS=Homo sapiens GN=FN1 PE=1 SV=4	9998	266052	544	415	154	139	7087	1	1	0	742.35	1482.69	2	1482.69	0	0	68.7	1.5e-06	R	GEWTCIAYSQLR	D			2_F80CXA20_1.6000.6000.2
1	P02751	Fibronectin OS=Homo sapiens GN=FN1 PE=1 SV=4	9998	266052	544	415	154	139	7797	1	1	0	515.26	1542.75	3	1542.76	-0.01	0	10.81	1	R	SYTITGLQPGTDYK	I			2_F80CXA20_2.5146.5146.3
1	P02751	Fibronectin OS=Homo sapiens GN=FN1 PE=1 SV=4	9998	266052	544	415	154	139	7798	1	1	0	515.26	1542.75	3	1542.76	-0.01	0	13.59	0.55	R	SYTITGLQPGTDYK	I			F80CXA20_2.5115.5115.3
1	P02751	Fibronectin OS=Homo sapiens GN=FN1 PE=1 SV=4	9998	266052	544	415	154	139	7799	1	1	0	772.39	1542.76	2	1542.76	0	0	72.43	7.2e-07	R	SYTITGLQPGTDYK	I			m84cxa20.4870.4870.2
1	P02751	Fibronectin OS=Homo sapiens GN=FN1 PE=1 SV=4	9998	266052	544	415	154	139	7800	1	1	0	772.39	1542.76	2	1542.76	0	0	77.41	2.3e-07	R	SYTITGLQPGTDYK	I			m84txb20.4442.4442.2
1	P02751	Fibronectin OS=Homo sapiens GN=FN1 PE=1 SV=4	9998	266052	544	415	154	139	7803	2	1	0	515.28	1542.81	3	1542.8	0	0	5.84	3.9	K	EATIPGHLNSYTIK	G			f69cxb20_100930171645.4155.4155.3
1	P02751	Fibronectin OS=Homo sapiens GN=FN1 PE=1 SV=4	9998	266052	544	415	154	139	7804	1	1	0	515.28	1542.81	3	1542.8	0	0	8.58	2.1	K	EATIPGHLNSYTIK	G			f69cxa20.4057.4057.3
1	P02751	Fibronectin OS=Homo sapiens GN=FN1 PE=1 SV=4	9998	266052	544	415	154	139	8045	1	1	0	523.2	1566.57	3	1566.57	0	0	33.3	0.00047	K	CDPHEATCYDDGK	T			m84txb20.1842.1842.3
1	P02751	Fibronectin OS=Homo sapiens GN=FN1 PE=1 SV=4	9998	266052	544	415	154	139	8046	1	1	0	523.2	1566.57	3	1566.57	0	0	35.32	0.00029	K	CDPHEATCYDDGK	T			2_F80CXA20_2.2139.2139.3
1	P02751	Fibronectin OS=Homo sapiens GN=FN1 PE=1 SV=4	9998	266052	544	415	154	139	8047	1	1	0	784.3	1566.58	2	1566.57	0.01	0	37.57	0.00017	K	CDPHEATCYDDGK	T			f69cxb20_100930171645.1897.1897.2
1	P02751	Fibronectin OS=Homo sapiens GN=FN1 PE=1 SV=4	9998	266052	544	415	154	139	8048	1	1	0	784.3	1566.58	2	1566.57	0.01	0	38.07	0.00016	K	CDPHEATCYDDGK	T			f69cxa20_100930142853.1852.1852.2
1	P02751	Fibronectin OS=Homo sapiens GN=FN1 PE=1 SV=4	9998	266052	544	415	154	139	8229	1	1	0	529.56	1585.65	3	1585.65	0	0	21.61	0.0097	K	WCGTTQNYDADQK	F			F80TXB20.3066.3066.3
1	P02751	Fibronectin OS=Homo sapiens GN=FN1 PE=1 SV=4	9998	266052	544	415	154	139	8230	1	1	0	529.56	1585.65	3	1585.65	0	0	8.29	0.21	K	WCGTTQNYDADQK	F			2_F80TXB20.2991.2991.3
1	P02751	Fibronectin OS=Homo sapiens GN=FN1 PE=1 SV=4	9998	266052	544	415	154	139	8232	1	1	0	793.83	1585.65	2	1585.65	0	0	78.36	2e-08	K	WCGTTQNYDADQK	F			F80CXA20_2.3052.3052.2
1	P02751	Fibronectin OS=Homo sapiens GN=FN1 PE=1 SV=4	9998	266052	544	415	154	139	8277	1	1	0	531.27	1590.8	3	1590.8	0	0	39.9	0.0017	R	GDSPASSKPISINYR	T			2_F80CXA20_2.3846.3846.3
1	P02751	Fibronectin OS=Homo sapiens GN=FN1 PE=1 SV=4	9998	266052	544	415	154	139	8278	1	1	0	531.27	1590.8	3	1590.8	0	0	47.31	0.0003	R	GDSPASSKPISINYR	T			2_F80TXA20.3880.3880.3
1	P02751	Fibronectin OS=Homo sapiens GN=FN1 PE=1 SV=4	9998	266052	544	415	154	139	8279	1	1	0	796.41	1590.8	2	1590.8	0	0	50.71	0.00015	R	GDSPASSKPISINYR	T			f69cxb20_100930171645.3396.3396.2
1	P02751	Fibronectin OS=Homo sapiens GN=FN1 PE=1 SV=4	9998	266052	544	415	154	139	8280	1	1	0	796.41	1590.8	2	1590.8	0	0	63.85	7.1e-06	R	GDSPASSKPISINYR	T			F80CXA20_1.3858.3858.2
1	P02751	Fibronectin OS=Homo sapiens GN=FN1 PE=1 SV=4	9998	266052	544	415	154	139	8297	1	1	0	797.41	1592.8	2	1592.8	0	0	97.3	3e-09	R	VTDATETTITISWR	T			2_F80CXA20_2.6168.6168.2
1	P02751	Fibronectin OS=Homo sapiens GN=FN1 PE=1 SV=4	9998	266052	544	415	154	139	8298	1	1	0	797.41	1592.8	2	1592.8	0	0	99.66	1.7e-09	R	VTDATETTITISWR	T			2_F80TXB20.6082.6082.2
1	P02751	Fibronectin OS=Homo sapiens GN=FN1 PE=1 SV=4	9998	266052	544	415	154	139	8410	1	1	0	536.62	1606.85	3	1606.85	0	1	24.37	0.041	R	QYNVGPSVSKYPLR	N			m84txb20.3730.3730.3
1	P02751	Fibronectin OS=Homo sapiens GN=FN1 PE=1 SV=4	9998	266052	544	415	154	139	8411	1	1	0	536.62	1606.85	3	1606.85	0	1	31.33	0.0082	R	QYNVGPSVSKYPLR	N			m84txa20.3773.3773.3
1	P02751	Fibronectin OS=Homo sapiens GN=FN1 PE=1 SV=4	9998	266052	544	415	154	139	8412	1	1	0	804.43	1606.85	2	1606.85	0	1	18.63	0.16	R	QYNVGPSVSKYPLR	N			m84cxa20.4112.4112.2
1	P02751	Fibronectin OS=Homo sapiens GN=FN1 PE=1 SV=4	9998	266052	544	415	154	139	8413	1	1	0	804.43	1606.85	2	1606.85	0	1	34.39	0.0042	R	QYNVGPSVSKYPLR	N			f69txa20.3924.3924.2
1	P02751	Fibronectin OS=Homo sapiens GN=FN1 PE=1 SV=4	9998	266052	544	415	154	139	8606	1	1	0	542.62	1624.84	3	1624.84	0	1	15.92	0.31	R	IRHHPEHFSGRPR	E			2_F80CXA20_2.1601.1601.3
1	P02751	Fibronectin OS=Homo sapiens GN=FN1 PE=1 SV=4	9998	266052	544	415	154	139	8607	1	1	0	542.62	1624.84	3	1624.84	0	1	34.27	0.0046	R	IRHHPEHFSGRPR	E			F80CXA20_2.1519.1519.3
1	P02751	Fibronectin OS=Homo sapiens GN=FN1 PE=1 SV=4	9998	266052	544	415	154	139	8608	1	1	0	407.22	1624.84	4	1624.84	0	1	15.97	0.31	R	IRHHPEHFSGRPR	E			2_F80CXA20_1.1614.1614.4
1	P02751	Fibronectin OS=Homo sapiens GN=FN1 PE=1 SV=4	9998	266052	544	415	154	139	8609	1	1	0	407.22	1624.84	4	1624.84	0	1	22.64	0.066	R	IRHHPEHFSGRPR	E			2_F80CXA20_2.1639.1639.4
1	P02751	Fibronectin OS=Homo sapiens GN=FN1 PE=1 SV=4	9998	266052	544	415	154	139	8610	1	1	0	813.43	1624.84	2	1624.84	0	1	14.22	0.48	R	IRHHPEHFSGRPR	E			F80CXA20_1.1555.1555.2
1	P02751	Fibronectin OS=Homo sapiens GN=FN1 PE=1 SV=4	9998	266052	544	415	154	139	8611	1	1	0	813.43	1624.84	2	1624.84	0	1	21.09	0.098	R	IRHHPEHFSGRPR	E			2_F80CXA20_2.1613.1613.2
1	P02751	Fibronectin OS=Homo sapiens GN=FN1 PE=1 SV=4	9998	266052	544	415	154	139	8653	1	1	0	543.96	1628.86	3	1628.86	0	0	7.27	2.5	R	VDVIPVNLPGEHGQR	L			f69cxb20_100930171645.7138.7138.3
1	P02751	Fibronectin OS=Homo sapiens GN=FN1 PE=1 SV=4	9998	266052	544	415	154	139	8654	1	1	0	543.96	1628.86	3	1628.86	0	0	4.6	4.7	R	VDVIPVNLPGEHGQR	L			f69txa20.7419.7419.3
1	P02751	Fibronectin OS=Homo sapiens GN=FN1 PE=1 SV=4	9998	266052	544	415	154	139	8655	1	1	0	815.44	1628.86	2	1628.86	0	0	67.47	2.4e-06	R	VDVIPVNLPGEHGQR	L			f69cxa20_100930142853.5003.5003.2
1	P02751	Fibronectin OS=Homo sapiens GN=FN1 PE=1 SV=4	9998	266052	544	415	154	139	8656	1	1	0	815.44	1628.86	2	1628.86	0	0	54.2	5.1e-05	R	VDVIPVNLPGEHGQR	L			2_F80CXA20_2.5584.5584.2
1	P02751	Fibronectin OS=Homo sapiens GN=FN1 PE=1 SV=4	9998	266052	544	415	154	139	8657	1	1	0	543.96	1628.87	3	1628.86	0	0	22.81	0.073	R	VDVIPVNLPGEHGQR	L			F80CXA20_2.5559.5559.3
1	P02751	Fibronectin OS=Homo sapiens GN=FN1 PE=1 SV=4	9998	266052	544	415	154	139	8658	1	1	0	543.96	1628.87	3	1628.86	0	0	32.36	0.0081	R	VDVIPVNLPGEHGQR	L			F80TXA20.5557.5557.3
1	P02751	Fibronectin OS=Homo sapiens GN=FN1 PE=1 SV=4	9998	266052	544	415	154	139	8785	1	1	0	547.9	1640.67	3	1640.67	0	0	16.84	0.071	K	DSMIWDCTCIGAGR	G			m84cxa20.5958.5958.3
1	P02751	Fibronectin OS=Homo sapiens GN=FN1 PE=1 SV=4	9998	266052	544	415	154	139	8786	1	1	0	547.9	1640.67	3	1640.67	0	0	23.54	0.015	K	DSMIWDCTCIGAGR	G			f69cxa20.5580.5580.3
1	P02751	Fibronectin OS=Homo sapiens GN=FN1 PE=1 SV=4	9998	266052	544	415	154	139	8787	1	1	0	821.35	1640.68	2	1640.67	0	0	69.21	4.4e-07	K	DSMIWDCTCIGAGR	G			2_F80CXA20_2.6186.6186.2
1	P02751	Fibronectin OS=Homo sapiens GN=FN1 PE=1 SV=4	9998	266052	544	415	154	139	8788	1	1	0	821.35	1640.68	2	1640.67	0	0	63.43	1.7e-06	K	DSMIWDCTCIGAGR	G			2_F80CXA20_1.6185.6185.2
1	P02751	Fibronectin OS=Homo sapiens GN=FN1 PE=1 SV=4	9998	266052	544	415	154	139	8884	1	1	0	551.27	1650.77	3	1650.78	0	0	53.43	4.6e-05	K	LLCQCLGFGSGHFR	C			F80CXA20_1.5713.5713.3
1	P02751	Fibronectin OS=Homo sapiens GN=FN1 PE=1 SV=4	9998	266052	544	415	154	139	8885	1	1	0	551.27	1650.77	3	1650.78	0	0	58.32	1.5e-05	K	LLCQCLGFGSGHFR	C			F80CXA20_2.5664.5664.3
1	P02751	Fibronectin OS=Homo sapiens GN=FN1 PE=1 SV=4	9998	266052	544	415	154	139	8888	1	1	0	826.4	1650.78	2	1650.78	0	0	85.7	3.4e-08	K	LLCQCLGFGSGHFR	C			F80TXB20.5689.5689.2
1	P02751	Fibronectin OS=Homo sapiens GN=FN1 PE=1 SV=4	9998	266052	544	415	154	139	8889	1	1	0	826.4	1650.78	2	1650.78	0	0	73.83	5.2e-07	K	LLCQCLGFGSGHFR	C			F80CXA20_2.5680.5680.2
1	P02751	Fibronectin OS=Homo sapiens GN=FN1 PE=1 SV=4	9998	266052	544	415	154	139	8978	1	1	0	829.34	1656.67	2	1656.67	0	0	54.71	4.7e-06	K	DSMIWDCTCIGAGR	G	Oxidation (M)	0.00100000000000.0	2_F80CXA20_1.5475.5475.2
1	P02751	Fibronectin OS=Homo sapiens GN=FN1 PE=1 SV=4	9998	266052	544	415	154	139	8979	1	1	0	829.34	1656.67	2	1656.67	0	0	45.77	3.7e-05	K	DSMIWDCTCIGAGR	G	Oxidation (M)	0.00100000000000.0	f69cxa20.4819.4819.2
1	P02751	Fibronectin OS=Homo sapiens GN=FN1 PE=1 SV=4	9998	266052	544	415	154	139	9723	1	1	0	863.92	1725.82	2	1725.81	0	0	81.06	8.8e-08	K	YSFCTDHTVLVQTR	G			F80TXA20.4820.4820.2
1	P02751	Fibronectin OS=Homo sapiens GN=FN1 PE=1 SV=4	9998	266052	544	415	154	139	9724	1	1	0	863.92	1725.82	2	1725.81	0	0	73.77	4.7e-07	K	YSFCTDHTVLVQTR	G			F80CXA20_2.4825.4825.2
1	P02751	Fibronectin OS=Homo sapiens GN=FN1 PE=1 SV=4	9998	266052	544	415	154	139	9725	1	1	0	576.28	1725.82	3	1725.81	0	0	34.24	0.0043	K	YSFCTDHTVLVQTR	G			f69txa20.4433.4433.3
1	P02751	Fibronectin OS=Homo sapiens GN=FN1 PE=1 SV=4	9998	266052	544	415	154	139	9726	1	1	0	576.28	1725.82	3	1725.81	0	0	27.56	0.02	K	YSFCTDHTVLVQTR	G			m84txb20.4312.4312.3
1	P02751	Fibronectin OS=Homo sapiens GN=FN1 PE=1 SV=4	9998	266052	544	415	154	139	9759	1	1	0	578.32	1731.94	3	1731.94	0	0	57.59	1.8e-05	R	NLQPASEYTVSLVAIK	G			F80TXA20.6600.6600.3
1	P02751	Fibronectin OS=Homo sapiens GN=FN1 PE=1 SV=4	9998	266052	544	415	154	139	9760	1	1	0	578.32	1731.94	3	1731.94	0	0	62.31	6.1e-06	R	NLQPASEYTVSLVAIK	G			2_F80TXB20.6530.6530.3
1	P02751	Fibronectin OS=Homo sapiens GN=FN1 PE=1 SV=4	9998	266052	544	415	154	139	9761	1	1	0	866.98	1731.94	2	1731.94	0	0	78.57	1.5e-07	R	NLQPASEYTVSLVAIK	G			m84txb20.5951.5951.2
1	P02751	Fibronectin OS=Homo sapiens GN=FN1 PE=1 SV=4	9998	266052	544	415	154	139	9762	1	1	0	866.98	1731.94	2	1731.94	0	0	80.22	1e-07	R	NLQPASEYTVSLVAIK	G			m84txb20.5844.5844.2
1	P02751	Fibronectin OS=Homo sapiens GN=FN1 PE=1 SV=4	9998	266052	544	415	154	139	10145	1	1	0	590.33	1767.97	3	1767.97	0	1	33.31	0.0035	R	IGFKLGVRPSQGGEAPR	E			2_F80CXA20_1.4386.4386.3
1	P02751	Fibronectin OS=Homo sapiens GN=FN1 PE=1 SV=4	9998	266052	544	415	154	139	10146	1	1	0	590.33	1767.97	3	1767.97	0	1	29.44	0.0086	R	IGFKLGVRPSQGGEAPR	E			F80TXA20.4351.4351.3
1	P02751	Fibronectin OS=Homo sapiens GN=FN1 PE=1 SV=4	9998	266052	544	415	154	139	10147	1	1	0	443	1767.98	4	1767.97	0	1	23.41	0.036	R	IGFKLGVRPSQGGEAPR	E			2_F80TXB20.4331.4331.4
1	P02751	Fibronectin OS=Homo sapiens GN=FN1 PE=1 SV=4	9998	266052	544	415	154	139	10148	1	1	0	443	1767.98	4	1767.97	0	1	24.24	0.03	R	IGFKLGVRPSQGGEAPR	E			2_F80TXA20.4427.4427.4
1	P02751	Fibronectin OS=Homo sapiens GN=FN1 PE=1 SV=4	9998	266052	544	415	154	139	10149	1	1	0	885	1767.98	2	1767.97	0	1	32.28	0.0042	R	IGFKLGVRPSQGGEAPR	E			2_F80CXA20_1.4392.4392.2
1	P02751	Fibronectin OS=Homo sapiens GN=FN1 PE=1 SV=4	9998	266052	544	415	154	139	10150	1	1	0	885	1767.98	2	1767.97	0	1	38.95	0.0009	R	IGFKLGVRPSQGGEAPR	E			F80CXA20_2.4355.4355.2
1	P02751	Fibronectin OS=Homo sapiens GN=FN1 PE=1 SV=4	9998	266052	544	415	154	139	10359	1	1	0	896.41	1790.81	2	1790.81	0	0	73.82	4.5e-07	R	TYLGNALVCTCYGGSR	G			f69cxa20_100930142853.4991.4991.2
1	P02751	Fibronectin OS=Homo sapiens GN=FN1 PE=1 SV=4	9998	266052	544	415	154	139	10360	1	1	0	896.41	1790.81	2	1790.81	0	0	82.94	5.5e-08	R	TYLGNALVCTCYGGSR	G			f69txb20.4834.4834.2
1	P02751	Fibronectin OS=Homo sapiens GN=FN1 PE=1 SV=4	9998	266052	544	415	154	139	10361	1	1	0	597.94	1790.81	3	1790.81	0	0	48.6	0.00015	R	TYLGNALVCTCYGGSR	G			2_F80TXA20.5640.5640.3
1	P02751	Fibronectin OS=Homo sapiens GN=FN1 PE=1 SV=4	9998	266052	544	415	154	139	10362	1	1	0	597.94	1790.81	3	1790.81	0	0	44.1	0.00042	R	TYLGNALVCTCYGGSR	G			m84cxb20.4852.4852.3
1	P02751	Fibronectin OS=Homo sapiens GN=FN1 PE=1 SV=4	9998	266052	544	415	154	139	10367	1	1	0	598.61	1792.8	3	1792.8	0	1	11.96	0.6	R	CHEGGQSYKIGDTWR	R			f69txb20.3206.3206.3
1	P02751	Fibronectin OS=Homo sapiens GN=FN1 PE=1 SV=4	9998	266052	544	415	154	139	10368	1	1	0	598.61	1792.8	3	1792.8	0	1	11.82	0.62	R	CHEGGQSYKIGDTWR	R			m84txa20.3339.3339.3
1	P02751	Fibronectin OS=Homo sapiens GN=FN1 PE=1 SV=4	9998	266052	544	415	154	139	10492	1	1	0	603.31	1806.9	3	1806.9	0	0	53.53	7.2e-05	K	VTIMWTPPESAVTGYR	V			F80TXA20.6858.6858.3
1	P02751	Fibronectin OS=Homo sapiens GN=FN1 PE=1 SV=4	9998	266052	544	415	154	139	10493	1	1	0	603.31	1806.9	3	1806.9	0	0	40.8	0.0014	K	VTIMWTPPESAVTGYR	V			2_F80TXA20.6904.6904.3
1	P02751	Fibronectin OS=Homo sapiens GN=FN1 PE=1 SV=4	9998	266052	544	415	154	139	10494	1	1	0	904.46	1806.9	2	1806.9	0	0	50.4	0.00015	K	VTIMWTPPESAVTGYR	V			f69txb20.6053.6053.2
1	P02751	Fibronectin OS=Homo sapiens GN=FN1 PE=1 SV=4	9998	266052	544	415	154	139	10495	1	1	0	904.46	1806.9	2	1806.9	0	0	37.27	0.003	K	VTIMWTPPESAVTGYR	V			F80TXA20.6847.6847.2
1	P02751	Fibronectin OS=Homo sapiens GN=FN1 PE=1 SV=4	9998	266052	544	415	154	139	10601	1	1	0	910.01	1818	2	1818	0	1	37.89	0.00082	R	ITGYIIKYEKPGSPPR	E			2_F80TXA20.4323.4323.2
1	P02751	Fibronectin OS=Homo sapiens GN=FN1 PE=1 SV=4	9998	266052	544	415	154	139	10602	1	1	0	910.01	1818	2	1818	0	1	52.95	2.6e-05	R	ITGYIIKYEKPGSPPR	E			F80TXB20.4251.4251.2
1	P02751	Fibronectin OS=Homo sapiens GN=FN1 PE=1 SV=4	9998	266052	544	415	154	139	10605	1	1	0	607.01	1818.01	3	1818	0	1	32.97	0.0021	R	ITGYIIKYEKPGSPPR	E			m84txa20.3740.3740.3
1	P02751	Fibronectin OS=Homo sapiens GN=FN1 PE=1 SV=4	9998	266052	544	415	154	139	10606	1	1	0	607.01	1818.01	3	1818	0	1	23.81	0.018	R	ITGYIIKYEKPGSPPR	E			m84txb20.3704.3704.3
1	P02751	Fibronectin OS=Homo sapiens GN=FN1 PE=1 SV=4	9998	266052	544	415	154	139	10628	1	1	0	607.66	1819.94	3	1819.94	0	1	19.2	0.17	R	ARVTDATETTITISWR	T			2_F80CXA20_1.5791.5791.3
1	P02751	Fibronectin OS=Homo sapiens GN=FN1 PE=1 SV=4	9998	266052	544	415	154	139	10629	1	1	0	607.66	1819.94	3	1819.94	0	1	25.32	0.041	R	ARVTDATETTITISWR	T			F80CXA20_1.5795.5795.3
1	P02751	Fibronectin OS=Homo sapiens GN=FN1 PE=1 SV=4	9998	266052	544	415	154	139	10686	1	1	0	912.45	1822.89	2	1822.89	0	0	50.02	0.00014	K	VTIMWTPPESAVTGYR	V	Oxidation (M)	0.0001000000000000.0	f69cxa20_100930142853.5722.5722.2
1	P02751	Fibronectin OS=Homo sapiens GN=FN1 PE=1 SV=4	9998	266052	544	415	154	139	10687	1	1	0	912.45	1822.89	2	1822.89	0	0	46.92	0.00028	K	VTIMWTPPESAVTGYR	V	Oxidation (M)	0.0001000000000000.0	f69cxb20.5749.5749.2
1	P02751	Fibronectin OS=Homo sapiens GN=FN1 PE=1 SV=4	9998	266052	544	415	154	139	10688	1	1	0	608.64	1822.89	3	1822.89	0	0	15.07	0.42	K	VTIMWTPPESAVTGYR	V	Oxidation (M)	0.0001000000000000.0	f69cxb20.5772.5772.3
1	P02751	Fibronectin OS=Homo sapiens GN=FN1 PE=1 SV=4	9998	266052	544	415	154	139	10971	1	1	0	616.63	1846.85	3	1846.85	0	1	28.55	0.015	K	DNRGNLLQCICTGNGR	G			2_F80CXA20_1.5139.5139.3
1	P02751	Fibronectin OS=Homo sapiens GN=FN1 PE=1 SV=4	9998	266052	544	415	154	139	10972	1	1	0	616.63	1846.85	3	1846.85	0	1	35.75	0.0028	K	DNRGNLLQCICTGNGR	G			F80CXA20_2.5088.5088.3
1	P02751	Fibronectin OS=Homo sapiens GN=FN1 PE=1 SV=4	9998	266052	544	415	154	139	10974	1	1	0	924.44	1846.86	2	1846.85	0	1	16.55	0.26	K	DNRGNLLQCICTGNGR	G			F80CXA20_2.5092.5092.2
1	P02751	Fibronectin OS=Homo sapiens GN=FN1 PE=1 SV=4	9998	266052	544	415	154	139	11041	1	1	0	618.94	1853.8	3	1853.8	0	1	10.21	0.43	K	DSMIWDCTCIGAGRGR	I			F80CXA20_1.5635.5635.3
1	P02751	Fibronectin OS=Homo sapiens GN=FN1 PE=1 SV=4	9998	266052	544	415	154	139	11042	1	1	0	618.94	1853.8	3	1853.8	0	1	23.95	0.018	K	DSMIWDCTCIGAGRGR	I			2_F80CXA20_1.5608.5608.3
1	P02751	Fibronectin OS=Homo sapiens GN=FN1 PE=1 SV=4	9998	266052	544	415	154	139	11073	1	1	0	620	1856.98	3	1856.98	0	1	28.81	0.013	R	WKEATIPGHLNSYTIK	G			F80TXA20.4898.4898.3
1	P02751	Fibronectin OS=Homo sapiens GN=FN1 PE=1 SV=4	9998	266052	544	415	154	139	11074	1	1	0	620	1856.98	3	1856.98	0	1	27.18	0.019	R	WKEATIPGHLNSYTIK	G			f69cxb20.4437.4437.3
1	P02751	Fibronectin OS=Homo sapiens GN=FN1 PE=1 SV=4	9998	266052	544	415	154	139	11075	1	1	0	465.25	1856.98	4	1856.98	0	1	8.46	1.3	R	WKEATIPGHLNSYTIK	G			2_F80TXB20.4867.4867.4
1	P02751	Fibronectin OS=Homo sapiens GN=FN1 PE=1 SV=4	9998	266052	544	415	154	139	11076	2	1	0	465.25	1856.98	4	1856.98	0	1	0.93	7.5	R	WKEATIPGHLNSYTIK	G			f69txa20.4531.4531.4
1	P02751	Fibronectin OS=Homo sapiens GN=FN1 PE=1 SV=4	9998	266052	544	415	154	139	11077	1	1	0	929.5	1856.98	2	1856.98	0	1	32.06	0.0058	R	WKEATIPGHLNSYTIK	G			F80TXB20.4918.4918.2
1	P02751	Fibronectin OS=Homo sapiens GN=FN1 PE=1 SV=4	9998	266052	544	415	154	139	11078	1	1	0	929.5	1856.98	2	1856.98	0	1	61.33	6.8e-06	R	WKEATIPGHLNSYTIK	G			F80CXA20_2.4903.4903.2
1	P02751	Fibronectin OS=Homo sapiens GN=FN1 PE=1 SV=4	9998	266052	544	415	154	139	11140	1	1	0	621.97	1862.88	3	1862.88	0	0	40.91	0.001	R	HTSVQTTSSGSGPFTDVR	A			F80TXA20.3831.3831.3
1	P02751	Fibronectin OS=Homo sapiens GN=FN1 PE=1 SV=4	9998	266052	544	415	154	139	11141	1	1	0	621.97	1862.88	3	1862.88	0	0	52.95	6.4e-05	R	HTSVQTTSSGSGPFTDVR	A			m84txa20.3392.3392.3
1	P02751	Fibronectin OS=Homo sapiens GN=FN1 PE=1 SV=4	9998	266052	544	415	154	139	11142	1	1	0	932.45	1862.88	2	1862.88	0	0	111.12	9.7e-11	R	HTSVQTTSSGSGPFTDVR	A			f69cxa20_100930142853.3357.3357.2
1	P02751	Fibronectin OS=Homo sapiens GN=FN1 PE=1 SV=4	9998	266052	544	415	154	139	11143	1	1	0	932.45	1862.88	2	1862.88	0	0	82.93	6.4e-08	R	HTSVQTTSSGSGPFTDVR	A			F80CXA20_1.3889.3889.2
1	P02751	Fibronectin OS=Homo sapiens GN=FN1 PE=1 SV=4	9998	266052	544	415	154	139	11212	1	1	0	936.38	1870.74	2	1870.74	0	0	29.02	0.0024	R	QGENGQMMSCTCLGNGK	G			f69cxb20_100930171645.3391.3391.2
1	P02751	Fibronectin OS=Homo sapiens GN=FN1 PE=1 SV=4	9998	266052	544	415	154	139	11213	1	1	0	936.38	1870.74	2	1870.74	0	0	71.62	1.3e-07	R	QGENGQMMSCTCLGNGK	G			F80TXB20.3696.3696.2
1	P02751	Fibronectin OS=Homo sapiens GN=FN1 PE=1 SV=4	9998	266052	544	415	154	139	11298	1	1	0	939.9	1877.79	2	1877.79	0	0	44.87	9e-05	K	EYLGAICSCTCFGGQR	G			2_F80TXB20.8738.8738.2
1	P02751	Fibronectin OS=Homo sapiens GN=FN1 PE=1 SV=4	9998	266052	544	415	154	139	11299	1	1	0	939.9	1877.79	2	1877.79	0	0	52.64	1.5e-05	K	EYLGAICSCTCFGGQR	G			m84txb20.7948.7948.2
1	P02751	Fibronectin OS=Homo sapiens GN=FN1 PE=1 SV=4	9998	266052	544	415	154	139	11300	1	1	0	626.94	1877.79	3	1877.79	0	0	41.56	0.00019	K	EYLGAICSCTCFGGQR	G			f69cxb20.4943.4943.3
1	P02751	Fibronectin OS=Homo sapiens GN=FN1 PE=1 SV=4	9998	266052	544	415	154	139	11301	1	1	0	626.94	1877.79	3	1877.79	0	0	56.49	6.2e-06	K	EYLGAICSCTCFGGQR	G			F80CXA20_1.5487.5487.3
1	P02751	Fibronectin OS=Homo sapiens GN=FN1 PE=1 SV=4	9998	266052	544	415	154	139	11302	1	1	0	939.9	1877.79	2	1877.79	0	0	89.71	2.9e-09	K	EYLGAICSCTCFGGQR	G			2_F80TXA20.5533.5533.2
1	P02751	Fibronectin OS=Homo sapiens GN=FN1 PE=1 SV=4	9998	266052	544	415	154	139	11303	1	1	0	939.9	1877.79	2	1877.79	0	0	85.21	8.3e-09	K	EYLGAICSCTCFGGQR	G			F80TXB20.5433.5433.2
1	P02751	Fibronectin OS=Homo sapiens GN=FN1 PE=1 SV=4	9998	266052	544	415	154	139	11304	1	1	0	939.91	1877.8	2	1877.79	0.01	0	37.44	0.00061	K	EYLGAICSCTCFGGQR	G			m84txb20.6389.6389.2
1	P02751	Fibronectin OS=Homo sapiens GN=FN1 PE=1 SV=4	9998	266052	544	415	154	139	11305	1	1	0	939.91	1877.8	2	1877.79	0.01	0	56.71	7.3e-06	K	EYLGAICSCTCFGGQR	G			m84txb20.6617.6617.2
1	P02751	Fibronectin OS=Homo sapiens GN=FN1 PE=1 SV=4	9998	266052	544	415	154	139	11306	1	1	0	939.91	1877.8	2	1877.79	0.01	0	61.4	2.5e-06	K	EYLGAICSCTCFGGQR	G			m84txb20.6649.6649.2
1	P02751	Fibronectin OS=Homo sapiens GN=FN1 PE=1 SV=4	9998	266052	544	415	154	139	11507	1	1	0	949.39	1896.76	2	1896.76	-0.01	1	9.53	0.12	R	CDSSRWCHDNGVNYK	I			2_F80CXA20_2.2879.2879.2
1	P02751	Fibronectin OS=Homo sapiens GN=FN1 PE=1 SV=4	9998	266052	544	415	154	139	11680	1	1	0	638.34	1911.98	3	1911.99	-0.01	0	4.31	5.5	R	SSPVVIDASTAIDAPSNLR	F			m84txa20.7272.7272.3
1	P02751	Fibronectin OS=Homo sapiens GN=FN1 PE=1 SV=4	9998	266052	544	415	154	139	11682	1	1	0	957	1911.99	2	1911.99	0	0	68.43	1.8e-06	R	SSPVVIDASTAIDAPSNLR	F			m84txb20.5005.5005.2
1	P02751	Fibronectin OS=Homo sapiens GN=FN1 PE=1 SV=4	9998	266052	544	415	154	139	11683	1	1	0	957	1911.99	2	1911.99	0	0	72.57	7e-07	R	SSPVVIDASTAIDAPSNLR	F			f69cxb20_100930171645.5141.5141.2
1	P02751	Fibronectin OS=Homo sapiens GN=FN1 PE=1 SV=4	9998	266052	544	415	154	139	11684	1	1	0	638.34	1911.99	3	1911.99	0	0	40.66	0.001	R	SSPVVIDASTAIDAPSNLR	F			F80TXA20.5975.5975.3
1	P02751	Fibronectin OS=Homo sapiens GN=FN1 PE=1 SV=4	9998	266052	544	415	154	139	11685	1	1	0	638.34	1911.99	3	1911.99	0	0	52.49	6.8e-05	R	SSPVVIDASTAIDAPSNLR	F			2_F80CXA20_2.5995.5995.3
1	P02751	Fibronectin OS=Homo sapiens GN=FN1 PE=1 SV=4	9998	266052	544	415	154	139	11686	1	1	0	957	1911.99	2	1911.99	0	0	70.61	1e-06	R	SSPVVIDASTAIDAPSNLR	F			f69txa20.5661.5661.2
1	P02751	Fibronectin OS=Homo sapiens GN=FN1 PE=1 SV=4	9998	266052	544	415	154	139	11687	1	1	0	957	1911.99	2	1911.99	0	0	78.32	1.8e-07	R	SSPVVIDASTAIDAPSNLR	F			f69cxa20_100930142853.5375.5375.2
1	P02751	Fibronectin OS=Homo sapiens GN=FN1 PE=1 SV=4	9998	266052	544	415	154	139	11846	1	1	0	963.53	1925.04	2	1925.04	0	0	77.93	1.1e-07	R	VTWAPPPSIDLTNFLVR	Y			f69txa20.8144.8144.2
1	P02751	Fibronectin OS=Homo sapiens GN=FN1 PE=1 SV=4	9998	266052	544	415	154	139	11847	1	1	0	963.53	1925.04	2	1925.04	0	0	52.03	4.3e-05	R	VTWAPPPSIDLTNFLVR	Y			m84txb20.7682.7682.2
1	P02751	Fibronectin OS=Homo sapiens GN=FN1 PE=1 SV=4	9998	266052	544	415	154	139	11848	1	1	0	642.69	1925.04	3	1925.04	0	0	37.3	0.0013	R	VTWAPPPSIDLTNFLVR	Y			f69txb20.7587.7587.3
1	P02751	Fibronectin OS=Homo sapiens GN=FN1 PE=1 SV=4	9998	266052	544	415	154	139	11849	1	1	0	642.69	1925.04	3	1925.04	0	0	37.24	0.0013	R	VTWAPPPSIDLTNFLVR	Y			m84txb20.7683.7683.3
1	P02751	Fibronectin OS=Homo sapiens GN=FN1 PE=1 SV=4	9998	266052	544	415	154	139	11855	1	1	0	964.02	1926.03	2	1926.04	-0.01	0	64.04	3.4e-06	R	FLATTPNSLLVSWQPPR	A			m84cxb20.6733.6733.2
1	P02751	Fibronectin OS=Homo sapiens GN=FN1 PE=1 SV=4	9998	266052	544	415	154	139	11856	1	1	0	964.02	1926.03	2	1926.04	-0.01	0	69.11	1.1e-06	R	FLATTPNSLLVSWQPPR	A			m84txa20.6980.6980.2
1	P02751	Fibronectin OS=Homo sapiens GN=FN1 PE=1 SV=4	9998	266052	544	415	154	139	11857	1	1	0	643.02	1926.04	3	1926.04	0	0	60.81	6.9e-06	R	FLATTPNSLLVSWQPPR	A			2_F80CXA20_2.7674.7674.3
1	P02751	Fibronectin OS=Homo sapiens GN=FN1 PE=1 SV=4	9998	266052	544	415	154	139	11858	1	1	0	643.02	1926.04	3	1926.04	0	0	58.54	1.2e-05	R	FLATTPNSLLVSWQPPR	A			f69cxa20.6980.6980.3
1	P02751	Fibronectin OS=Homo sapiens GN=FN1 PE=1 SV=4	9998	266052	544	415	154	139	12114	1	1	0	652.34	1954	3	1954	0	0	39.57	0.0016	R	EESPLLIGQQSTVSDVPR	D			f69cxb20.5269.5269.3
1	P02751	Fibronectin OS=Homo sapiens GN=FN1 PE=1 SV=4	9998	266052	544	415	154	139	12115	1	1	0	652.34	1954	3	1954	0	0	43.45	0.00063	R	EESPLLIGQQSTVSDVPR	D			f69cxb20_100930171645.5237.5237.3
1	P02751	Fibronectin OS=Homo sapiens GN=FN1 PE=1 SV=4	9998	266052	544	415	154	139	12116	1	1	0	978.01	1954	2	1954	0	0	72.89	6.5e-07	R	EESPLLIGQQSTVSDVPR	D			m84txa20.5162.5162.2
1	P02751	Fibronectin OS=Homo sapiens GN=FN1 PE=1 SV=4	9998	266052	544	415	154	139	12117	1	1	0	978.01	1954	2	1954	0	0	75.23	3.8e-07	R	EESPLLIGQQSTVSDVPR	D			f69cxa20.5134.5134.2
1	P02751	Fibronectin OS=Homo sapiens GN=FN1 PE=1 SV=4	9998	266052	544	415	154	139	12194	1	1	0	654.98	1961.92	3	1961.92	0	1	5.05	2.9	R	GNLLQCICTGNGRGEWK	C			f69txb20.5045.5045.3
1	P02751	Fibronectin OS=Homo sapiens GN=FN1 PE=1 SV=4	9998	266052	544	415	154	139	12195	1	1	0	654.98	1961.92	3	1961.92	0	1	10.09	0.91	R	GNLLQCICTGNGRGEWK	C			m84cxb20.5038.5038.3
1	P02751	Fibronectin OS=Homo sapiens GN=FN1 PE=1 SV=4	9998	266052	544	415	154	139	12196	1	1	0	981.98	1961.94	2	1961.92	0.02	1	47.03	0.00024	R	GNLLQCICTGNGRGEWK	C			F80TXB20.5784.5784.2
1	P02751	Fibronectin OS=Homo sapiens GN=FN1 PE=1 SV=4	9998	266052	544	415	154	139	12197	1	1	0	981.98	1961.94	2	1961.92	0.02	1	45.72	0.00032	R	GNLLQCICTGNGRGEWK	C			F80CXA20_2.5755.5755.2
1	P02751	Fibronectin OS=Homo sapiens GN=FN1 PE=1 SV=4	9998	266052	544	415	154	139	12348	1	1	0	989.03	1976.04	2	1976.04	0	1	51.95	5.5e-05	K	WLPSSSPVTGYRVTTTPK	N			F80TXB20.5207.5207.2
1	P02751	Fibronectin OS=Homo sapiens GN=FN1 PE=1 SV=4	9998	266052	544	415	154	139	12349	1	1	0	989.03	1976.04	2	1976.04	0	1	60.27	8.1e-06	K	WLPSSSPVTGYRVTTTPK	N			2_F80CXA20_1.5213.5213.2
1	P02751	Fibronectin OS=Homo sapiens GN=FN1 PE=1 SV=4	9998	266052	544	415	154	139	12405	1	1	0	496.97	1983.85	4	1983.85	0	1	34.42	0.0012	R	IGDQWDKQHDMGHMMR	C			F80CXA20_1.3910.3910.4
1	P02751	Fibronectin OS=Homo sapiens GN=FN1 PE=1 SV=4	9998	266052	544	415	154	139	12406	1	1	0	496.97	1983.85	4	1983.85	0	1	27.17	0.0064	R	IGDQWDKQHDMGHMMR	C			F80TXB20.3885.3885.4
1	P02751	Fibronectin OS=Homo sapiens GN=FN1 PE=1 SV=4	9998	266052	544	415	154	139	12407	1	1	0	662.29	1983.85	3	1983.85	0	1	48.55	4.5e-05	R	IGDQWDKQHDMGHMMR	C			F80TXA20.3837.3837.3
1	P02751	Fibronectin OS=Homo sapiens GN=FN1 PE=1 SV=4	9998	266052	544	415	154	139	12408	1	1	0	662.29	1983.85	3	1983.85	0	1	26.01	0.008	R	IGDQWDKQHDMGHMMR	C			f69cxa20_100930142853.3587.3587.3
1	P02751	Fibronectin OS=Homo sapiens GN=FN1 PE=1 SV=4	9998	266052	544	415	154	139	12409	1	1	0	992.93	1983.85	2	1983.85	0	1	14.37	0.12	R	IGDQWDKQHDMGHMMR	C			2_F80CXA20_1.3903.3903.2
1	P02751	Fibronectin OS=Homo sapiens GN=FN1 PE=1 SV=4	9998	266052	544	415	154	139	12410	1	1	0	992.93	1983.85	2	1983.85	0	1	58.78	4.2e-06	R	IGDQWDKQHDMGHMMR	C			F80CXA20_2.3873.3873.2
1	P02751	Fibronectin OS=Homo sapiens GN=FN1 PE=1 SV=4	9998	266052	544	415	154	139	12488	1	1	0	997.5	1992.98	2	1992.98	0	0	78.12	2.3e-07	R	NTFAEVTGLSPGVTYYFK	V			2_F80TXB20.7406.7406.2
1	P02751	Fibronectin OS=Homo sapiens GN=FN1 PE=1 SV=4	9998	266052	544	415	154	139	12489	1	1	0	997.5	1992.98	2	1992.98	0	0	84.13	5.7e-08	R	NTFAEVTGLSPGVTYYFK	V			F80CXA20_1.7468.7468.2
1	P02751	Fibronectin OS=Homo sapiens GN=FN1 PE=1 SV=4	9998	266052	544	415	154	139	12492	1	1	0	665.34	1992.99	3	1992.98	0	0	55.8	4.2e-05	R	NTFAEVTGLSPGVTYYFK	V			f69txa20.7038.7038.3
1	P02751	Fibronectin OS=Homo sapiens GN=FN1 PE=1 SV=4	9998	266052	544	415	154	139	12493	1	1	0	665.34	1992.99	3	1992.98	0	0	62.21	9.6e-06	R	NTFAEVTGLSPGVTYYFK	V			m84txa20.6778.6778.3
1	P02751	Fibronectin OS=Homo sapiens GN=FN1 PE=1 SV=4	9998	266052	544	415	154	139	12565	1	1	0	667.62	1999.84	3	1999.85	0	1	23.28	0.015	R	IGDQWDKQHDMGHMMR	C	Oxidation (M)	0.0000000000100000.0	F80CXA20_2.3100.3100.3
1	P02751	Fibronectin OS=Homo sapiens GN=FN1 PE=1 SV=4	9998	266052	544	415	154	139	12566	1	1	0	667.62	1999.84	3	1999.85	0	1	19.3	0.037	R	IGDQWDKQHDMGHMMR	C	Oxidation (M)	0.0000000000000100.0	2_F80CXA20_1.3133.3133.3
1	P02751	Fibronectin OS=Homo sapiens GN=FN1 PE=1 SV=4	9998	266052	544	415	154	139	13046	1	1	0	1024.42	2046.83	2	2046.83	0	0	62.7	5.4e-07	R	GFNCESKPEAEETCFDK	Y			m84cxa20.3491.3491.2
1	P02751	Fibronectin OS=Homo sapiens GN=FN1 PE=1 SV=4	9998	266052	544	415	154	139	13047	1	1	0	1024.42	2046.83	2	2046.83	0	0	46.88	2.1e-05	R	GFNCESKPEAEETCFDK	Y			2_F80TXA20.3712.3712.2
1	P02751	Fibronectin OS=Homo sapiens GN=FN1 PE=1 SV=4	9998	266052	544	415	154	139	13048	1	1	0	683.29	2046.83	3	2046.83	0	0	45.22	3e-05	R	GFNCESKPEAEETCFDK	Y			m84txb20.3137.3137.3
1	P02751	Fibronectin OS=Homo sapiens GN=FN1 PE=1 SV=4	9998	266052	544	415	154	139	13049	1	1	0	683.29	2046.83	3	2046.83	0	0	51.77	6.7e-06	R	GFNCESKPEAEETCFDK	Y			2_F80CXA20_1.3679.3679.3
1	P02751	Fibronectin OS=Homo sapiens GN=FN1 PE=1 SV=4	9998	266052	544	415	154	139	13250	1	1	0	692.29	2073.86	3	2073.85	0.01	1	49.82	1.7e-05	R	DNMKWCGTTQNYDADQK	F			2_F80CXA20_2.3689.3689.3
1	P02751	Fibronectin OS=Homo sapiens GN=FN1 PE=1 SV=4	9998	266052	544	415	154	139	13251	1	1	0	692.29	2073.86	3	2073.85	0.01	1	56.31	3.9e-06	R	DNMKWCGTTQNYDADQK	F			m84txb20.3161.3161.3
1	P02751	Fibronectin OS=Homo sapiens GN=FN1 PE=1 SV=4	9998	266052	544	415	154	139	13381	1	1	0	697.62	2089.85	3	2089.85	0	1	45.35	6e-05	R	DNMKWCGTTQNYDADQK	F	Oxidation (M)	0.00100000000000000.0	F80CXA20_1.3110.3110.3
1	P02751	Fibronectin OS=Homo sapiens GN=FN1 PE=1 SV=4	9998	266052	544	415	154	139	13382	1	1	0	697.62	2089.85	3	2089.85	0	1	40.57	0.00018	R	DNMKWCGTTQNYDADQK	F	Oxidation (M)	0.00100000000000000.0	2_F80CXA20_2.3089.3089.3
1	P02751	Fibronectin OS=Homo sapiens GN=FN1 PE=1 SV=4	9998	266052	544	415	154	139	13383	1	1	0	1045.93	2089.85	2	2089.85	0	1	19.09	0.025	R	DNMKWCGTTQNYDADQK	F	Oxidation (M)	0.00100000000000000.0	2_F80CXA20_2.3108.3108.2
1	P02751	Fibronectin OS=Homo sapiens GN=FN1 PE=1 SV=4	9998	266052	544	415	154	139	13556	1	1	0	706.38	2116.11	3	2116.11	0	0	59.48	1.1e-05	K	EINLAPDSSSVVVSGLMVATK	Y			f69cxb20_100930171645.6704.6704.3
1	P02751	Fibronectin OS=Homo sapiens GN=FN1 PE=1 SV=4	9998	266052	544	415	154	139	13557	1	1	0	706.38	2116.11	3	2116.11	0	0	46.72	0.0002	K	EINLAPDSSSVVVSGLMVATK	Y			f69cxb20.6718.6718.3
1	P02751	Fibronectin OS=Homo sapiens GN=FN1 PE=1 SV=4	9998	266052	544	415	154	139	13558	1	1	0	1059.06	2116.11	2	2116.11	0	0	76.21	2.4e-07	K	EINLAPDSSSVVVSGLMVATK	Y			f69txb20.6477.6477.2
1	P02751	Fibronectin OS=Homo sapiens GN=FN1 PE=1 SV=4	9998	266052	544	415	154	139	13559	1	1	0	1059.06	2116.11	2	2116.11	0	0	78.07	1.6e-07	K	EINLAPDSSSVVVSGLMVATK	Y			2_F80CXA20_1.7335.7335.2
1	P02751	Fibronectin OS=Homo sapiens GN=FN1 PE=1 SV=4	9998	266052	544	415	154	139	13560	1	1	0	1059.08	2116.14	2	2116.14	0	0	26.46	0.017	K	ESVPISDTIIPAVPPPTDLR	F			2_F80TXB20.7081.7081.2
1	P02751	Fibronectin OS=Homo sapiens GN=FN1 PE=1 SV=4	9998	266052	544	415	154	139	13561	1	1	0	1059.08	2116.14	2	2116.14	0	0	19.47	0.086	K	ESVPISDTIIPAVPPPTDLR	F			m84txb20.6358.6358.2
1	P02751	Fibronectin OS=Homo sapiens GN=FN1 PE=1 SV=4	9998	266052	544	415	154	139	13562	1	1	0	706.39	2116.14	3	2116.14	0	0	33.55	0.0033	K	ESVPISDTIIPAVPPPTDLR	F			F80CXA20_1.7121.7121.3
1	P02751	Fibronectin OS=Homo sapiens GN=FN1 PE=1 SV=4	9998	266052	544	415	154	139	13563	1	1	0	706.39	2116.14	3	2116.14	0	0	22.03	0.047	K	ESVPISDTIIPAVPPPTDLR	F			f69txa20.6702.6702.3
1	P02751	Fibronectin OS=Homo sapiens GN=FN1 PE=1 SV=4	9998	266052	544	415	154	139	13660	1	1	0	1067.06	2132.1	2	2132.1	0	0	58.27	1.9e-05	K	EINLAPDSSSVVVSGLMVATK	Y	Oxidation (M)	0.000000000000000010000.0	f69cxb20.6180.6180.2
1	P02751	Fibronectin OS=Homo sapiens GN=FN1 PE=1 SV=4	9998	266052	544	415	154	139	13661	1	1	0	1067.06	2132.1	2	2132.1	0	0	74.67	4.2e-07	K	EINLAPDSSSVVVSGLMVATK	Y	Oxidation (M)	0.000000000000000010000.0	2_F80TXA20.6840.6840.2
1	P02751	Fibronectin OS=Homo sapiens GN=FN1 PE=1 SV=4	9998	266052	544	415	154	139	13813	1	1	0	718.73	2153.17	3	2153.17	0	1	20.17	0.041	R	FLATTPNSLLVSWQPPRAR	I			F80CXA20_1.7207.7207.3
1	P02751	Fibronectin OS=Homo sapiens GN=FN1 PE=1 SV=4	9998	266052	544	415	154	139	13814	1	1	0	718.73	2153.17	3	2153.17	0	1	14.87	0.14	R	FLATTPNSLLVSWQPPRAR	I			2_F80CXA20_1.7191.7191.3
1	P02751	Fibronectin OS=Homo sapiens GN=FN1 PE=1 SV=4	9998	266052	544	415	154	139	13815	1	1	0	539.3	2153.18	4	2153.17	0	1	40.76	0.00036	R	FLATTPNSLLVSWQPPRAR	I			F80TXA20.7208.7208.4
1	P02751	Fibronectin OS=Homo sapiens GN=FN1 PE=1 SV=4	9998	266052	544	415	154	139	13816	1	1	0	539.3	2153.18	4	2153.17	0	1	0.78	3.6	R	FLATTPNSLLVSWQPPRAR	I			2_F80TXB20.7088.7088.4
1	P02751	Fibronectin OS=Homo sapiens GN=FN1 PE=1 SV=4	9998	266052	544	415	154	139	13926	1	1	0	723.35	2167.04	3	2167.04	0	0	7.61	1.7	R	ITYGETGGNSPVQEFTVPGSK	S			F80TXB20.4906.4906.3
1	P02751	Fibronectin OS=Homo sapiens GN=FN1 PE=1 SV=4	9998	266052	544	415	154	139	13928	1	1	0	723.36	2167.05	3	2167.04	0	0	36.93	0.0022	R	ITYGETGGNSPVQEFTVPGSK	S			f69cxb20_100930171645.5123.5123.3
1	P02751	Fibronectin OS=Homo sapiens GN=FN1 PE=1 SV=4	9998	266052	544	415	154	139	13929	1	1	0	723.36	2167.05	3	2167.04	0	0	37.34	0.002	R	ITYGETGGNSPVQEFTVPGSK	S			m84cxb20.4913.4913.3
1	P02751	Fibronectin OS=Homo sapiens GN=FN1 PE=1 SV=4	9998	266052	544	415	154	139	13930	1	1	0	1084.53	2167.05	2	2167.04	0	0	72.65	5.6e-07	R	ITYGETGGNSPVQEFTVPGSK	S			F80CXA20_2.5656.5656.2
1	P02751	Fibronectin OS=Homo sapiens GN=FN1 PE=1 SV=4	9998	266052	544	415	154	139	13931	1	1	0	1084.53	2167.05	2	2167.04	0	0	59.91	1.1e-05	R	ITYGETGGNSPVQEFTVPGSK	S			f69cxa20.5030.5030.2
1	P02751	Fibronectin OS=Homo sapiens GN=FN1 PE=1 SV=4	9998	266052	544	415	154	139	14007	1	1	0	545.25	2176.99	4	2176.98	0	0	1.79	5.5	R	RPHETGGYMLECVCLGNGK	G			f69txa20.4812.4812.4
1	P02751	Fibronectin OS=Homo sapiens GN=FN1 PE=1 SV=4	9998	266052	544	415	154	139	14008	1	1	0	545.25	2176.99	4	2176.98	0	0	11.38	0.61	R	RPHETGGYMLECVCLGNGK	G			f69cxb20.4712.4712.4
1	P02751	Fibronectin OS=Homo sapiens GN=FN1 PE=1 SV=4	9998	266052	544	415	154	139	14135	1	1	0	732	2192.98	3	2192.98	0	0	44.89	0.00023	R	RPHETGGYMLECVCLGNGK	G	Oxidation (M)	0.0000000010000000000.0	2_F80TXB20.4336.4336.3
1	P02751	Fibronectin OS=Homo sapiens GN=FN1 PE=1 SV=4	9998	266052	544	415	154	139	14136	1	1	0	732	2192.98	3	2192.98	0	0	41.06	0.00056	R	RPHETGGYMLECVCLGNGK	G	Oxidation (M)	0.0000000010000000000.0	2_F80TXA20.4440.4440.3
1	P02751	Fibronectin OS=Homo sapiens GN=FN1 PE=1 SV=4	9998	266052	544	415	154	139	14150	1	1	0	1098.61	2195.21	2	2195.22	-0.01	1	17.85	0.07	R	VDVIPVNLPGEHGQRLPISR	N			f69cxa20.5329.5329.2
1	P02751	Fibronectin OS=Homo sapiens GN=FN1 PE=1 SV=4	9998	266052	544	415	154	139	14151	1	1	0	549.81	2195.22	4	2195.22	0	1	2.65	1.9	R	VDVIPVNLPGEHGQRLPISR	N			f69cxa20_100930142853.5429.5429.4
1	P02751	Fibronectin OS=Homo sapiens GN=FN1 PE=1 SV=4	9998	266052	544	415	154	139	14152	2	1	0	549.81	2195.22	4	2195.22	0	1	1.75	2.3	R	VDVIPVNLPGEHGQRLPISR	N			f69txb20.5200.5200.4
1	P02751	Fibronectin OS=Homo sapiens GN=FN1 PE=1 SV=4	9998	266052	544	415	154	139	14153	1	1	0	732.75	2195.22	3	2195.22	0	1	10.77	0.29	R	VDVIPVNLPGEHGQRLPISR	N			f69cxb20.5421.5421.3
1	P02751	Fibronectin OS=Homo sapiens GN=FN1 PE=1 SV=4	9998	266052	544	415	154	139	14154	1	1	0	732.75	2195.22	3	2195.22	0	1	0.74	2.9	R	VDVIPVNLPGEHGQRLPISR	N			f69cxb20_100930171645.5447.5447.3
1	P02751	Fibronectin OS=Homo sapiens GN=FN1 PE=1 SV=4	9998	266052	544	415	154	139	14157	1	1	0	1098.97	2195.92	2	2195.92	0	0	60.38	3.2e-06	R	QDGHLWCSTTSNYEQDQK	Y			f69txb20.3310.3310.2
1	P02751	Fibronectin OS=Homo sapiens GN=FN1 PE=1 SV=4	9998	266052	544	415	154	139	14158	1	1	0	1098.97	2195.92	2	2195.92	0	0	47.26	6.5e-05	R	QDGHLWCSTTSNYEQDQK	Y			f69cxb20.3492.3492.2
1	P02751	Fibronectin OS=Homo sapiens GN=FN1 PE=1 SV=4	9998	266052	544	415	154	139	14159	1	1	0	732.98	2195.92	3	2195.92	0	0	60.25	3.3e-06	R	QDGHLWCSTTSNYEQDQK	Y			m84txb20.3355.3355.3
1	P02751	Fibronectin OS=Homo sapiens GN=FN1 PE=1 SV=4	9998	266052	544	415	154	139	14160	1	1	0	732.98	2195.92	3	2195.92	0	0	50.41	3.1e-05	R	QDGHLWCSTTSNYEQDQK	Y			f69cxa20.3337.3337.3
1	P02751	Fibronectin OS=Homo sapiens GN=FN1 PE=1 SV=4	9998	266052	544	415	154	139	15011	1	1	0	770.36	2308.05	3	2308.05	0	1	56.48	1.8e-05	K	CERHTSVQTTSSGSGPFTDVR	A			2_F80CXA20_1.3609.3609.3
1	P02751	Fibronectin OS=Homo sapiens GN=FN1 PE=1 SV=4	9998	266052	544	415	154	139	15012	1	1	0	770.36	2308.05	3	2308.05	0	1	56.34	1.8e-05	K	CERHTSVQTTSSGSGPFTDVR	A			F80CXA20_1.3608.3608.3
1	P02751	Fibronectin OS=Homo sapiens GN=FN1 PE=1 SV=4	9998	266052	544	415	154	139	15176	1	1	0	1166.99	2331.97	2	2331.97	0	1	25.23	0.0078	R	QGENGQMMSCTCLGNGKGEFK	C			2_F80CXA20_2.4279.4279.2
1	P02751	Fibronectin OS=Homo sapiens GN=FN1 PE=1 SV=4	9998	266052	544	415	154	139	15177	1	1	0	1166.99	2331.97	2	2331.97	0	1	3.11	1.3	R	QGENGQMMSCTCLGNGKGEFK	C			2_F80TXB20.4302.4302.2
1	P02751	Fibronectin OS=Homo sapiens GN=FN1 PE=1 SV=4	9998	266052	544	415	154	139	15178	1	1	0	778.34	2331.99	3	2331.97	0.02	1	46.45	9.4e-05	R	QGENGQMMSCTCLGNGKGEFK	C			2_F80TXA20.4311.4311.3
1	P02751	Fibronectin OS=Homo sapiens GN=FN1 PE=1 SV=4	9998	266052	544	415	154	139	15221	1	1	0	1169.62	2337.22	2	2337.23	-0.01	0	45.7	0.00024	K	DTLTSRPAQGVVTTLENVSPPR	R			m84cxa20.5935.5935.2
1	P02751	Fibronectin OS=Homo sapiens GN=FN1 PE=1 SV=4	9998	266052	544	415	154	139	15222	1	1	0	1169.62	2337.22	2	2337.23	-0.01	0	66.82	1.8e-06	K	DTLTSRPAQGVVTTLENVSPPR	R			f69cxb20.5622.5622.2
1	P02751	Fibronectin OS=Homo sapiens GN=FN1 PE=1 SV=4	9998	266052	544	415	154	139	15223	1	1	0	780.08	2337.23	3	2337.23	0	0	31.18	0.0061	K	DTLTSRPAQGVVTTLENVSPPR	R			f69cxb20_100930171645.5672.5672.3
1	P02751	Fibronectin OS=Homo sapiens GN=FN1 PE=1 SV=4	9998	266052	544	415	154	139	15224	1	1	0	780.08	2337.23	3	2337.23	0	0	19.61	0.088	K	DTLTSRPAQGVVTTLENVSPPR	R			m84cxb20.5444.5444.3
1	P02751	Fibronectin OS=Homo sapiens GN=FN1 PE=1 SV=4	9998	266052	544	415	154	139	15258	1	1	0	1172.1	2342.19	2	2342.19	0	0	17.91	0.18	K	TETITGFQVDAVPANGQTPIQR	T			f69cxb20_100930171645.5409.5409.2
1	P02751	Fibronectin OS=Homo sapiens GN=FN1 PE=1 SV=4	9998	266052	544	415	154	139	15259	1	1	0	1172.1	2342.19	2	2342.19	0	0	65.95	2.8e-06	K	TETITGFQVDAVPANGQTPIQR	T			f69txa20.5465.5465.2
1	P02751	Fibronectin OS=Homo sapiens GN=FN1 PE=1 SV=4	9998	266052	544	415	154	139	15260	1	1	0	781.74	2342.19	3	2342.19	0	0	44.85	0.00037	K	TETITGFQVDAVPANGQTPIQR	T			f69txa20.5534.5534.3
1	P02751	Fibronectin OS=Homo sapiens GN=FN1 PE=1 SV=4	9998	266052	544	415	154	139	15261	1	1	0	781.74	2342.19	3	2342.19	0	0	15.12	0.35	K	TETITGFQVDAVPANGQTPIQR	T			m84txa20.5379.5379.3
1	P02751	Fibronectin OS=Homo sapiens GN=FN1 PE=1 SV=4	9998	266052	544	415	154	139	15558	1	1	0	796.7	2387.07	3	2387.06	0.01	1	35.5	0.0016	R	CTCVGNGRGEWTCIAYSQLR	D			F80TXA20.5606.5606.3
1	P02751	Fibronectin OS=Homo sapiens GN=FN1 PE=1 SV=4	9998	266052	544	415	154	139	15559	1	1	0	796.7	2387.07	3	2387.06	0.01	1	47.8	9.6e-05	R	CTCVGNGRGEWTCIAYSQLR	D			F80TXB20.5627.5627.3
1	P02751	Fibronectin OS=Homo sapiens GN=FN1 PE=1 SV=4	9998	266052	544	415	154	139	15596	1	1	0	1198.55	2395.08	2	2395.08	0	0	24.26	0.025	R	RPGGEPSPEGTTGQSYNQYSQR	Y			m84txa20.2595.2595.2
1	P02751	Fibronectin OS=Homo sapiens GN=FN1 PE=1 SV=4	9998	266052	544	415	154	139	15597	1	1	0	1198.55	2395.08	2	2395.08	0	0	54.42	2.4e-05	R	RPGGEPSPEGTTGQSYNQYSQR	Y			F80TXA20.2884.2884.2
1	P02751	Fibronectin OS=Homo sapiens GN=FN1 PE=1 SV=4	9998	266052	544	415	154	139	15598	1	1	0	799.37	2395.08	3	2395.08	0	0	64.61	2.4e-06	R	RPGGEPSPEGTTGQSYNQYSQR	Y			F80CXA20_2.2901.2901.3
1	P02751	Fibronectin OS=Homo sapiens GN=FN1 PE=1 SV=4	9998	266052	544	415	154	139	15599	1	1	0	799.37	2395.08	3	2395.08	0	0	65.54	2e-06	R	RPGGEPSPEGTTGQSYNQYSQR	Y			2_F80CXA20_1.2930.2930.3
1	P02751	Fibronectin OS=Homo sapiens GN=FN1 PE=1 SV=4	9998	266052	544	415	154	139	15716	1	1	0	605.28	2417.11	4	2417.11	0	1	16.44	0.15	R	MSESGFKLLCQCLGFGSGHFR	C			2_F80CXA20_2.7082.7082.4
1	P02751	Fibronectin OS=Homo sapiens GN=FN1 PE=1 SV=4	9998	266052	544	415	154	139	15717	1	1	0	605.28	2417.11	4	2417.11	0	1	19	0.085	R	MSESGFKLLCQCLGFGSGHFR	C			F80TXB20.7115.7115.4
1	P02751	Fibronectin OS=Homo sapiens GN=FN1 PE=1 SV=4	9998	266052	544	415	154	139	15964	1	1	0	1231.61	2461.2	2	2461.2	0	0	29.95	0.013	R	TEIDKPSQMQVTDVQDNSISVK	W			m84cxb20.4057.4057.2
1	P02751	Fibronectin OS=Homo sapiens GN=FN1 PE=1 SV=4	9998	266052	544	415	154	139	15965	1	1	0	1231.61	2461.2	2	2461.2	0	0	42.83	0.00069	R	TEIDKPSQMQVTDVQDNSISVK	W			F80CXA20_2.4686.4686.2
1	P02751	Fibronectin OS=Homo sapiens GN=FN1 PE=1 SV=4	9998	266052	544	415	154	139	15966	1	1	0	821.41	2461.2	3	2461.2	0	0	40.63	0.0012	R	TEIDKPSQMQVTDVQDNSISVK	W			f69txa20.4321.4321.3
1	P02751	Fibronectin OS=Homo sapiens GN=FN1 PE=1 SV=4	9998	266052	544	415	154	139	15967	1	1	0	821.41	2461.2	3	2461.2	0	0	52.46	7.7e-05	R	TEIDKPSQMQVTDVQDNSISVK	W			m84txb20.4169.4169.3
1	P02751	Fibronectin OS=Homo sapiens GN=FN1 PE=1 SV=4	9998	266052	544	415	154	139	16025	1	1	0	824.1	2469.29	3	2469.31	-0.02	0	9.88	0.68	K	STATISGLKPGVDYTITVYAVTGR	G			2_F80CXA20_2.8589.8589.3
1	P02751	Fibronectin OS=Homo sapiens GN=FN1 PE=1 SV=4	9998	266052	544	415	154	139	16026	1	1	0	824.1	2469.29	3	2469.31	-0.02	0	8.43	0.95	K	STATISGLKPGVDYTITVYAVTGR	G			2_F80CXA20_1.8638.8638.3
1	P02751	Fibronectin OS=Homo sapiens GN=FN1 PE=1 SV=4	9998	266052	544	415	154	139	16027	1	1	0	618.33	2469.3	4	2469.31	-0.01	0	1.97	4.5	K	STATISGLKPGVDYTITVYAVTGR	G			2_F80CXA20_1.6824.6824.4
1	P02751	Fibronectin OS=Homo sapiens GN=FN1 PE=1 SV=4	9998	266052	544	415	154	139	16028	1	1	0	1235.66	2469.31	2	2469.31	0	0	70.56	5.7e-07	K	STATISGLKPGVDYTITVYAVTGR	G			2_F80CXA20_1.6802.6802.2
1	P02751	Fibronectin OS=Homo sapiens GN=FN1 PE=1 SV=4	9998	266052	544	415	154	139	16029	1	1	0	1235.66	2469.31	2	2469.31	0	0	69.45	7.3e-07	K	STATISGLKPGVDYTITVYAVTGR	G			2_F80CXA20_2.6805.6805.2
1	P02751	Fibronectin OS=Homo sapiens GN=FN1 PE=1 SV=4	9998	266052	544	415	154	139	16030	1	1	0	824.11	2469.32	3	2469.31	0	0	30.48	0.0058	K	STATISGLKPGVDYTITVYAVTGR	G			2_F80TXA20.6891.6891.3
1	P02751	Fibronectin OS=Homo sapiens GN=FN1 PE=1 SV=4	9998	266052	544	415	154	139	16031	1	1	0	824.11	2469.32	3	2469.31	0	0	34.96	0.0021	K	STATISGLKPGVDYTITVYAVTGR	G			m84cxa20.6560.6560.3
1	P02751	Fibronectin OS=Homo sapiens GN=FN1 PE=1 SV=4	9998	266052	544	415	154	139	16038	1	1	0	1237.15	2472.29	2	2472.29	0	1	72.65	5.3e-07	R	NLQPASEYTVSLVAIKGNQESPK	A			2_F80TXA20.5862.5862.2
1	P02751	Fibronectin OS=Homo sapiens GN=FN1 PE=1 SV=4	9998	266052	544	415	154	139	16039	1	1	0	1237.15	2472.29	2	2472.29	0	1	73.38	4.5e-07	R	NLQPASEYTVSLVAIKGNQESPK	A			F80TXA20.5783.5783.2
1	P02751	Fibronectin OS=Homo sapiens GN=FN1 PE=1 SV=4	9998	266052	544	415	154	139	16040	1	1	0	825.1	2472.29	3	2472.29	0	1	23.65	0.041	R	NLQPASEYTVSLVAIKGNQESPK	A			m84cxa20.5543.5543.3
1	P02751	Fibronectin OS=Homo sapiens GN=FN1 PE=1 SV=4	9998	266052	544	415	154	139	16041	1	1	0	825.1	2472.29	3	2472.29	0	1	14.87	0.31	R	NLQPASEYTVSLVAIKGNQESPK	A			2_F80TXB20.5711.5711.3
1	P02751	Fibronectin OS=Homo sapiens GN=FN1 PE=1 SV=4	9998	266052	544	415	154	139	16049	1	1	0	1238.16	2474.3	2	2474.29	0.01	1	23.75	0.029	K	DDKESVPISDTIIPAVPPPTDLR	F			2_F80TXB20.6874.6874.2
1	P02751	Fibronectin OS=Homo sapiens GN=FN1 PE=1 SV=4	9998	266052	544	415	154	139	16050	1	1	0	1238.16	2474.3	2	2474.29	0.01	1	47.38	0.00012	K	DDKESVPISDTIIPAVPPPTDLR	F			2_F80TXA20.6979.6979.2
1	P02751	Fibronectin OS=Homo sapiens GN=FN1 PE=1 SV=4	9998	266052	544	415	154	139	16083	1	1	0	826.74	2477.2	3	2477.2	0	0	43.52	0.0005	R	TEIDKPSQMQVTDVQDNSISVK	W	Oxidation (M)	0.0000000010000000000000.0	2_F80TXB20.4033.4033.3
1	P02751	Fibronectin OS=Homo sapiens GN=FN1 PE=1 SV=4	9998	266052	544	415	154	139	16084	1	1	0	826.74	2477.2	3	2477.2	0	0	30.46	0.01	R	TEIDKPSQMQVTDVQDNSISVK	W	Oxidation (M)	0.0000000010000000000000.0	m84txb20.3519.3519.3
1	P02751	Fibronectin OS=Homo sapiens GN=FN1 PE=1 SV=4	9998	266052	544	415	154	139	16175	1	1	0	1247.56	2493.11	2	2493.11	0	0	69.98	4.3e-07	R	TNTNVNCPIECFMPLDVQADR	E			2_F80TXA20.7487.7487.2
1	P02751	Fibronectin OS=Homo sapiens GN=FN1 PE=1 SV=4	9998	266052	544	415	154	139	16176	1	1	0	1247.56	2493.11	2	2493.11	0	0	58.85	5.5e-06	R	TNTNVNCPIECFMPLDVQADR	E			2_F80CXA20_1.7407.7407.2
1	P02751	Fibronectin OS=Homo sapiens GN=FN1 PE=1 SV=4	9998	266052	544	415	154	139	16177	1	1	0	832.04	2493.11	3	2493.11	0	0	55.21	1.3e-05	R	TNTNVNCPIECFMPLDVQADR	E			F80CXA20_2.7372.7372.3
1	P02751	Fibronectin OS=Homo sapiens GN=FN1 PE=1 SV=4	9998	266052	544	415	154	139	16178	1	1	0	832.04	2493.11	3	2493.11	0	0	14.73	0.15	R	TNTNVNCPIECFMPLDVQADR	E			m84cxa20.7162.7162.3
1	P02751	Fibronectin OS=Homo sapiens GN=FN1 PE=1 SV=4	9998	266052	544	415	154	139	16184	1	1	0	499.67	2493.33	5	2493.33	0	1	19.58	0.075	K	DTLTSRPAQGVVTTLENVSPPRR	A			2_F80CXA20_1.5832.5832.5
1	P02751	Fibronectin OS=Homo sapiens GN=FN1 PE=1 SV=4	9998	266052	544	415	154	139	16185	1	1	0	499.67	2493.33	5	2493.33	0	1	12.33	0.4	K	DTLTSRPAQGVVTTLENVSPPRR	A			f69cxa20.5190.5190.5
1	P02751	Fibronectin OS=Homo sapiens GN=FN1 PE=1 SV=4	9998	266052	544	415	154	139	16186	1	1	0	832.12	2493.33	3	2493.33	0	1	17.67	0.12	K	DTLTSRPAQGVVTTLENVSPPRR	A			f69cxb20.5268.5268.3
1	P02751	Fibronectin OS=Homo sapiens GN=FN1 PE=1 SV=4	9998	266052	544	415	154	139	16187	1	1	0	832.12	2493.33	3	2493.33	0	1	18.78	0.091	K	DTLTSRPAQGVVTTLENVSPPRR	A			f69cxb20_100930171645.5236.5236.3
1	P02751	Fibronectin OS=Homo sapiens GN=FN1 PE=1 SV=4	9998	266052	544	415	154	139	16188	1	1	0	624.34	2493.33	4	2493.33	0	1	47.05	0.00014	K	DTLTSRPAQGVVTTLENVSPPRR	A			f69cxa20.5158.5158.4
1	P02751	Fibronectin OS=Homo sapiens GN=FN1 PE=1 SV=4	9998	266052	544	415	154	139	16189	1	1	0	624.34	2493.33	4	2493.33	0	1	30.89	0.0056	K	DTLTSRPAQGVVTTLENVSPPRR	A			m84cxa20.5559.5559.4
1	P02751	Fibronectin OS=Homo sapiens GN=FN1 PE=1 SV=4	9998	266052	544	415	154	139	16373	1	1	0	631.85	2523.36	4	2523.36	0	0	73.35	2.5e-07	R	DLEVVAATPTSLLISWDAPAVTVR	Y			F80CXA20_2.8622.8622.4
1	P02751	Fibronectin OS=Homo sapiens GN=FN1 PE=1 SV=4	9998	266052	544	415	154	139	16374	1	1	0	631.85	2523.36	4	2523.36	0	0	52.73	2.9e-05	R	DLEVVAATPTSLLISWDAPAVTVR	Y			f69txb20.7782.7782.4
1	P02751	Fibronectin OS=Homo sapiens GN=FN1 PE=1 SV=4	9998	266052	544	415	154	139	16375	1	1	0	842.13	2523.36	3	2523.36	0	0	32.42	0.0031	R	DLEVVAATPTSLLISWDAPAVTVR	Y			m84txb20.7953.7953.3
1	P02751	Fibronectin OS=Homo sapiens GN=FN1 PE=1 SV=4	9998	266052	544	415	154	139	16376	1	1	0	842.13	2523.36	3	2523.36	0	0	35.51	0.0015	R	DLEVVAATPTSLLISWDAPAVTVR	Y			f69cxa20_100930142853.8007.8007.3
1	P02751	Fibronectin OS=Homo sapiens GN=FN1 PE=1 SV=4	9998	266052	544	415	154	139	16377	1	1	0	1262.69	2523.36	2	2523.36	0	0	59.58	5.9e-06	R	DLEVVAATPTSLLISWDAPAVTVR	Y			m84txb20.7979.7979.2
1	P02751	Fibronectin OS=Homo sapiens GN=FN1 PE=1 SV=4	9998	266052	544	415	154	139	16378	1	1	0	1262.69	2523.36	2	2523.36	0	0	47.58	9.4e-05	R	DLEVVAATPTSLLISWDAPAVTVR	Y			m84txa20.7925.7925.2
1	P02751	Fibronectin OS=Homo sapiens GN=FN1 PE=1 SV=4	9998	266052	544	415	154	139	16408	1	1	0	1266.69	2531.36	2	2531.36	0	0	70.66	3.4e-07	R	NSITLTNLTPGTEYVVSIVALNGR	E			f69cxb20_100930171645.7618.7618.2
1	P02751	Fibronectin OS=Homo sapiens GN=FN1 PE=1 SV=4	9998	266052	544	415	154	139	16409	1	1	0	1266.69	2531.36	2	2531.36	0	0	78.66	5.4e-08	R	NSITLTNLTPGTEYVVSIVALNGR	E			f69txa20.7901.7901.2
1	P02751	Fibronectin OS=Homo sapiens GN=FN1 PE=1 SV=4	9998	266052	544	415	154	139	16410	1	1	0	844.79	2531.36	3	2531.36	0	0	49.74	4.6e-05	R	NSITLTNLTPGTEYVVSIVALNGR	E			f69txa20.7910.7910.3
1	P02751	Fibronectin OS=Homo sapiens GN=FN1 PE=1 SV=4	9998	266052	544	415	154	139	16411	1	1	0	844.79	2531.36	3	2531.36	0	0	38.97	0.00055	R	NSITLTNLTPGTEYVVSIVALNGR	E			f69cxb20_100930171645.7593.7593.3
1	P02751	Fibronectin OS=Homo sapiens GN=FN1 PE=1 SV=4	9998	266052	544	415	154	139	16655	1	1	0	643.84	2571.33	4	2571.33	0	1	31.66	0.0061	R	TKTETITGFQVDAVPANGQTPIQR	T			F80CXA20_2.5437.5437.4
1	P02751	Fibronectin OS=Homo sapiens GN=FN1 PE=1 SV=4	9998	266052	544	415	154	139	16656	1	1	0	643.84	2571.33	4	2571.33	0	1	39.61	0.00097	R	TKTETITGFQVDAVPANGQTPIQR	T			2_F80CXA20_2.5454.5454.4
1	P02751	Fibronectin OS=Homo sapiens GN=FN1 PE=1 SV=4	9998	266052	544	415	154	139	16657	1	1	0	1286.67	2571.33	2	2571.33	0	1	24.73	0.028	R	TKTETITGFQVDAVPANGQTPIQR	T			2_F80TXA20.5584.5584.2
1	P02751	Fibronectin OS=Homo sapiens GN=FN1 PE=1 SV=4	9998	266052	544	415	154	139	16658	1	1	0	1286.67	2571.33	2	2571.33	0	1	16.16	0.2	R	TKTETITGFQVDAVPANGQTPIQR	T			m84txb20.4919.4919.2
1	P02751	Fibronectin OS=Homo sapiens GN=FN1 PE=1 SV=4	9998	266052	544	415	154	139	16877	1	1	0	1310.56	2619.1	2	2619.1	0	0	62.74	7.7e-07	K	FGFCPMAAHEEICTTNEGVMYR	I			2_F80TXB20.6207.6207.2
1	P02751	Fibronectin OS=Homo sapiens GN=FN1 PE=1 SV=4	9998	266052	544	415	154	139	16878	1	1	0	1310.56	2619.1	2	2619.1	0	0	87.98	2.3e-09	K	FGFCPMAAHEEICTTNEGVMYR	I			F80TXA20.6243.6243.2
1	P02751	Fibronectin OS=Homo sapiens GN=FN1 PE=1 SV=4	9998	266052	544	415	154	139	16879	1	1	0	874.04	2619.1	3	2619.1	0	0	44.57	5.1e-05	K	FGFCPMAAHEEICTTNEGVMYR	I			f69txa20.5816.5816.3
1	P02751	Fibronectin OS=Homo sapiens GN=FN1 PE=1 SV=4	9998	266052	544	415	154	139	16880	1	1	0	874.04	2619.1	3	2619.1	0	0	56.87	3e-06	K	FGFCPMAAHEEICTTNEGVMYR	I			f69txb20.5476.5476.3
1	P02751	Fibronectin OS=Homo sapiens GN=FN1 PE=1 SV=4	9998	266052	544	415	154	139	16929	1	1	0	879.37	2635.1	3	2635.1	0	0	35.89	0.00036	K	FGFCPMAAHEEICTTNEGVMYR	I	Oxidation (M)	0.0000010000000000000000.0	2_F80CXA20_2.5789.5789.3
1	P02751	Fibronectin OS=Homo sapiens GN=FN1 PE=1 SV=4	9998	266052	544	415	154	139	16930	1	1	0	879.37	2635.1	3	2635.1	0	0	50.67	1.2e-05	K	FGFCPMAAHEEICTTNEGVMYR	I	Oxidation (M)	0.0000000000000000000100.0	2_F80CXA20_1.5911.5911.3
1	P02751	Fibronectin OS=Homo sapiens GN=FN1 PE=1 SV=4	9998	266052	544	415	154	139	16967	1	1	0	1325.64	2649.27	2	2649.27	0	1	24.42	0.035	R	YYRITYGETGGNSPVQEFTVPGSK	S			2_F80CXA20_1.5882.5882.2
1	P02751	Fibronectin OS=Homo sapiens GN=FN1 PE=1 SV=4	9998	266052	544	415	154	139	16968	1	1	0	884.1	2649.27	3	2649.27	0	1	24.14	0.037	R	YYRITYGETGGNSPVQEFTVPGSK	S			f69txb20.5130.5130.3
1	P02751	Fibronectin OS=Homo sapiens GN=FN1 PE=1 SV=4	9998	266052	544	415	154	139	16969	1	1	0	884.1	2649.27	3	2649.27	0	1	57.31	1.8e-05	R	YYRITYGETGGNSPVQEFTVPGSK	S			2_F80TXA20.5931.5931.3
1	P02751	Fibronectin OS=Homo sapiens GN=FN1 PE=1 SV=4	9998	266052	544	415	154	139	17095	1	1	0	672.56	2686.2	4	2686.19	0	1	13.39	0.19	R	VGDTYERPKDSMIWDCTCIGAGR	G			f69cxb20_100930171645.4990.4990.4
1	P02751	Fibronectin OS=Homo sapiens GN=FN1 PE=1 SV=4	9998	266052	544	415	154	139	17096	1	1	0	672.56	2686.2	4	2686.19	0	1	13.6	0.18	R	VGDTYERPKDSMIWDCTCIGAGR	G			f69txa20.4992.4992.4
1	P02751	Fibronectin OS=Homo sapiens GN=FN1 PE=1 SV=4	9998	266052	544	415	154	139	17097	1	1	0	1344.11	2686.2	2	2686.19	0.01	1	12.44	0.22	R	VGDTYERPKDSMIWDCTCIGAGR	G			F80TXB20.5427.5427.2
1	P02751	Fibronectin OS=Homo sapiens GN=FN1 PE=1 SV=4	9998	266052	544	415	154	139	17098	1	1	0	1344.11	2686.2	2	2686.19	0.01	1	22.64	0.021	R	VGDTYERPKDSMIWDCTCIGAGR	G			F80TXA20.5408.5408.2
1	P02751	Fibronectin OS=Homo sapiens GN=FN1 PE=1 SV=4	9998	266052	544	415	154	139	17110	1	1	0	673.85	2691.36	4	2691.37	0	0	43.76	0.00038	K	FTQVTPTSLSAQWTPPNVQLTGYR	V			F80TXB20.7200.7200.4
1	P02751	Fibronectin OS=Homo sapiens GN=FN1 PE=1 SV=4	9998	266052	544	415	154	139	17111	1	1	0	1346.69	2691.37	2	2691.37	0	0	43.83	0.00037	K	FTQVTPTSLSAQWTPPNVQLTGYR	V			2_F80TXA20.7247.7247.2
1	P02751	Fibronectin OS=Homo sapiens GN=FN1 PE=1 SV=4	9998	266052	544	415	154	139	17112	1	1	0	1346.69	2691.37	2	2691.37	0	0	70.54	7.8e-07	K	FTQVTPTSLSAQWTPPNVQLTGYR	V			f69txa20.6732.6732.2
1	P02751	Fibronectin OS=Homo sapiens GN=FN1 PE=1 SV=4	9998	266052	544	415	154	139	17113	1	1	0	898.13	2691.37	3	2691.37	0	0	5.85	2.3	K	FTQVTPTSLSAQWTPPNVQLTGYR	V			2_F80CXA20_1.6810.6810.3
1	P02751	Fibronectin OS=Homo sapiens GN=FN1 PE=1 SV=4	9998	266052	544	415	154	139	17114	1	1	0	898.13	2691.37	3	2691.37	0	0	43.38	0.00039	K	FTQVTPTSLSAQWTPPNVQLTGYR	V			2_F80TXA20.7246.7246.3
1	P02751	Fibronectin OS=Homo sapiens GN=FN1 PE=1 SV=4	9998	266052	544	415	154	139	17115	1	1	0	898.13	2691.37	3	2691.37	0	0	42.68	0.00046	K	FTQVTPTSLSAQWTPPNVQLTGYR	V			F80CXA20_2.7140.7140.3
1	P02751	Fibronectin OS=Homo sapiens GN=FN1 PE=1 SV=4	9998	266052	544	415	154	139	17141	1	1	0	901.74	2702.19	3	2702.19	0	1	28.82	0.0044	R	VGDTYERPKDSMIWDCTCIGAGR	G	Oxidation (M)	0.00000000000100000000000.0	f69txa20.4486.4486.3
1	P02751	Fibronectin OS=Homo sapiens GN=FN1 PE=1 SV=4	9998	266052	544	415	154	139	17142	1	1	0	901.74	2702.19	3	2702.19	0	1	33.22	0.0016	R	VGDTYERPKDSMIWDCTCIGAGR	G	Oxidation (M)	0.00000000000100000000000.0	f69cxa20.4261.4261.3
1	P02751	Fibronectin OS=Homo sapiens GN=FN1 PE=1 SV=4	9998	266052	544	415	154	139	17143	1	1	0	676.55	2702.19	4	2702.19	0	1	13.92	0.14	R	VGDTYERPKDSMIWDCTCIGAGR	G	Oxidation (M)	0.00000000000100000000000.0	2_F80CXA20_1.4877.4877.4
1	P02751	Fibronectin OS=Homo sapiens GN=FN1 PE=1 SV=4	9998	266052	544	415	154	139	17144	1	1	0	676.55	2702.19	4	2702.19	0	1	14.46	0.12	R	VGDTYERPKDSMIWDCTCIGAGR	G	Oxidation (M)	0.00000000000100000000000.0	2_F80CXA20_2.4874.4874.4
1	P02751	Fibronectin OS=Homo sapiens GN=FN1 PE=1 SV=4	9998	266052	544	415	154	139	17504	1	1	0	700.63	2798.48	4	2798.47	0	0	48.94	8.2e-05	K	GLKPGVVYEGQLISIQQYGHQEVTR	F			2_F80TXB20.5846.5846.4
1	P02751	Fibronectin OS=Homo sapiens GN=FN1 PE=1 SV=4	9998	266052	544	415	154	139	17505	1	1	0	700.63	2798.48	4	2798.47	0	0	60.36	5.9e-06	K	GLKPGVVYEGQLISIQQYGHQEVTR	F			F80TXB20.5907.5907.4
1	P02751	Fibronectin OS=Homo sapiens GN=FN1 PE=1 SV=4	9998	266052	544	415	154	139	17506	1	1	0	933.83	2798.48	3	2798.47	0	0	53.17	3.1e-05	K	GLKPGVVYEGQLISIQQYGHQEVTR	F			F80CXA20_2.5892.5892.3
1	P02751	Fibronectin OS=Homo sapiens GN=FN1 PE=1 SV=4	9998	266052	544	415	154	139	17507	1	1	0	933.83	2798.48	3	2798.47	0	0	66.13	1.5e-06	K	GLKPGVVYEGQLISIQQYGHQEVTR	F			F80TXB20.5912.5912.3
1	P02751	Fibronectin OS=Homo sapiens GN=FN1 PE=1 SV=4	9998	266052	544	415	154	139	17599	1	1	0	565.64	2823.17	5	2823.17	0	1	20.49	0.015	K	CDPHEATCYDDGKTYHVGEQWQK	E			m84cxa20.3486.3486.5
1	P02751	Fibronectin OS=Homo sapiens GN=FN1 PE=1 SV=4	9998	266052	544	415	154	139	17600	1	1	0	565.64	2823.17	5	2823.17	0	1	21.91	0.011	K	CDPHEATCYDDGKTYHVGEQWQK	E			F80CXA20_1.3672.3672.5
1	P02751	Fibronectin OS=Homo sapiens GN=FN1 PE=1 SV=4	9998	266052	544	415	154	139	17601	1	1	0	942.06	2823.17	3	2823.17	0	1	15.42	0.047	K	CDPHEATCYDDGKTYHVGEQWQK	E			2_F80CXA20_2.3669.3669.3
1	P02751	Fibronectin OS=Homo sapiens GN=FN1 PE=1 SV=4	9998	266052	544	415	154	139	17602	1	1	0	942.06	2823.17	3	2823.17	0	1	15.19	0.05	K	CDPHEATCYDDGKTYHVGEQWQK	E			2_F80TXA20.3707.3707.3
1	P02751	Fibronectin OS=Homo sapiens GN=FN1 PE=1 SV=4	9998	266052	544	415	154	139	17677	1	1	0	949.82	2846.44	3	2846.44	0	1	51.21	5.9e-05	R	NTFAEVTGLSPGVTYYFKVFAVSHGR	E			2_F80TXA20.8033.8033.3
1	P02751	Fibronectin OS=Homo sapiens GN=FN1 PE=1 SV=4	9998	266052	544	415	154	139	17679	1	1	0	712.62	2846.44	4	2846.44	0	1	27.4	0.014	R	NTFAEVTGLSPGVTYYFKVFAVSHGR	E			F80CXA20_1.7921.7921.4
1	P02751	Fibronectin OS=Homo sapiens GN=FN1 PE=1 SV=4	9998	266052	544	415	154	139	17680	1	1	0	712.62	2846.44	4	2846.44	0	1	1.89	5.1	R	NTFAEVTGLSPGVTYYFKVFAVSHGR	E			f69txa20.7683.7683.4
1	P02751	Fibronectin OS=Homo sapiens GN=FN1 PE=1 SV=4	9998	266052	544	415	154	139	17689	1	1	0	950.12	2847.34	3	2847.33	0.01	0	39.09	0.001	R	QAQQMVQPQSPVAVSQSKPGCYDNGK	H	Oxidation (M)	0.00001000000000000000000000.0	2_F80CXA20_1.3516.3516.3
1	P02751	Fibronectin OS=Homo sapiens GN=FN1 PE=1 SV=4	9998	266052	544	415	154	139	17690	1	1	0	950.12	2847.34	3	2847.33	0.01	0	49.69	8.8e-05	R	QAQQMVQPQSPVAVSQSKPGCYDNGK	H	Oxidation (M)	0.00001000000000000000000000.0	F80CXA20_2.3475.3475.3
1	P02751	Fibronectin OS=Homo sapiens GN=FN1 PE=1 SV=4	9998	266052	544	415	154	139	17750	1	1	0	1433.08	2864.14	2	2864.15	-0.02	0	40.64	8.6e-05	K	CDPVDQCQDSETGTFYQIGDSWEK	Y			f69txa20.6040.6040.2
1	P02751	Fibronectin OS=Homo sapiens GN=FN1 PE=1 SV=4	9998	266052	544	415	154	139	17751	1	1	0	1433.08	2864.14	2	2864.15	-0.02	0	71.3	7.4e-08	K	CDPVDQCQDSETGTFYQIGDSWEK	Y			F80TXB20.6470.6470.2
1	P02751	Fibronectin OS=Homo sapiens GN=FN1 PE=1 SV=4	9998	266052	544	415	154	139	17752	1	1	0	955.72	2864.15	3	2864.15	0	0	68.85	1.3e-07	K	CDPVDQCQDSETGTFYQIGDSWEK	Y			F80TXB20.6464.6464.3
1	P02751	Fibronectin OS=Homo sapiens GN=FN1 PE=1 SV=4	9998	266052	544	415	154	139	17753	1	1	0	955.72	2864.15	3	2864.15	0	0	29.37	0.0012	K	CDPVDQCQDSETGTFYQIGDSWEK	Y			f69cxb20.5886.5886.3
1	P02751	Fibronectin OS=Homo sapiens GN=FN1 PE=1 SV=4	9998	266052	544	415	154	139	17800	1	1	0	960.81	2879.41	3	2879.43	-0.03	1	47.29	0.0002	R	SYTITGLQPGTDYKIYLYTLNDNAR	S			2_F80CXA20_2.7140.7140.3
1	P02751	Fibronectin OS=Homo sapiens GN=FN1 PE=1 SV=4	9998	266052	544	415	154	139	17801	1	1	0	960.81	2879.41	3	2879.43	-0.03	1	64.22	4e-06	R	SYTITGLQPGTDYKIYLYTLNDNAR	S			F80TXB20.7138.7138.3
1	P02751	Fibronectin OS=Homo sapiens GN=FN1 PE=1 SV=4	9998	266052	544	415	154	139	17802	1	1	0	1440.72	2879.43	2	2879.43	0	1	34.99	0.003	R	SYTITGLQPGTDYKIYLYTLNDNAR	S			F80CXA20_1.7147.7147.2
1	P02751	Fibronectin OS=Homo sapiens GN=FN1 PE=1 SV=4	9998	266052	544	415	154	139	17803	1	1	0	1440.72	2879.43	2	2879.43	0	1	54.78	3.1e-05	R	SYTITGLQPGTDYKIYLYTLNDNAR	S			2_F80CXA20_2.7128.7128.2
1	P02751	Fibronectin OS=Homo sapiens GN=FN1 PE=1 SV=4	9998	266052	544	415	154	139	17892	1	1	0	968.41	2902.22	3	2902.22	0.01	1	54.26	6e-06	R	GFNCESKPEAEETCFDKYTGNTYR	V			F80CXA20_2.4435.4435.3
1	P02751	Fibronectin OS=Homo sapiens GN=FN1 PE=1 SV=4	9998	266052	544	415	154	139	17893	1	1	0	968.41	2902.22	3	2902.22	0.01	1	51.06	1.3e-05	R	GFNCESKPEAEETCFDKYTGNTYR	V			f69cxb20_100930171645.3978.3978.3
1	P02751	Fibronectin OS=Homo sapiens GN=FN1 PE=1 SV=4	9998	266052	544	415	154	139	17894	1	1	0	1452.12	2902.22	2	2902.22	0.01	1	33.91	0.00065	R	GFNCESKPEAEETCFDKYTGNTYR	V			f69cxa20.3883.3883.2
1	P02751	Fibronectin OS=Homo sapiens GN=FN1 PE=1 SV=4	9998	266052	544	415	154	139	17895	1	1	0	1452.12	2902.22	2	2902.22	0.01	1	45.3	4.7e-05	R	GFNCESKPEAEETCFDKYTGNTYR	V			F80CXA20_1.4499.4499.2
1	P02751	Fibronectin OS=Homo sapiens GN=FN1 PE=1 SV=4	9998	266052	544	415	154	139	17896	1	1	0	726.56	2902.22	4	2902.22	0.01	1	41.31	0.00012	R	GFNCESKPEAEETCFDKYTGNTYR	V			m84cxa20.4229.4229.4
1	P02751	Fibronectin OS=Homo sapiens GN=FN1 PE=1 SV=4	9998	266052	544	415	154	139	17897	1	1	0	726.56	2902.22	4	2902.22	0.01	1	22.74	0.0085	R	GFNCESKPEAEETCFDKYTGNTYR	V			F80CXA20_2.4434.4434.4
1	P02751	Fibronectin OS=Homo sapiens GN=FN1 PE=1 SV=4	9998	266052	544	415	154	139	17965	1	1	0	973.48	2917.42	3	2917.42	0	0	49.47	7.8e-05	K	TGLDSPTGIDFSDITANSFTVHWIAPR	A			f69cxb20.7499.7499.3
1	P02751	Fibronectin OS=Homo sapiens GN=FN1 PE=1 SV=4	9998	266052	544	415	154	139	18079	1	1	0	983.19	2946.53	3	2946.54	0	1	44.29	0.00023	K	FTQVTPTSLSAQWTPPNVQLTGYRVR	V			2_F80TXB20.6911.6911.3
1	P02751	Fibronectin OS=Homo sapiens GN=FN1 PE=1 SV=4	9998	266052	544	415	154	139	18080	1	1	0	983.19	2946.53	3	2946.54	0	1	56.17	1.5e-05	K	FTQVTPTSLSAQWTPPNVQLTGYRVR	V			F80TXA20.6960.6960.3
1	P02751	Fibronectin OS=Homo sapiens GN=FN1 PE=1 SV=4	9998	266052	544	415	154	139	18162	1	1	0	1484.78	2967.54	2	2967.54	0	0	47.95	0.00011	R	EVTSDSGSIVVSGLTPGVEYVYTIQVLR	D			2_F80TXA20.8328.8328.2
1	P02751	Fibronectin OS=Homo sapiens GN=FN1 PE=1 SV=4	9998	266052	544	415	154	139	18163	1	1	0	1484.78	2967.54	2	2967.54	0	0	78.85	8.6e-08	R	EVTSDSGSIVVSGLTPGVEYVYTIQVLR	D			F80TXB20.8299.8299.2
1	P02751	Fibronectin OS=Homo sapiens GN=FN1 PE=1 SV=4	9998	266052	544	415	154	139	18164	1	1	0	990.19	2967.55	3	2967.54	0	0	7.81	1.1	R	EVTSDSGSIVVSGLTPGVEYVYTIQVLR	D			m84cxb20.7268.7268.3
1	P02751	Fibronectin OS=Homo sapiens GN=FN1 PE=1 SV=4	9998	266052	544	415	154	139	18165	1	1	0	990.19	2967.55	3	2967.54	0	0	22.85	0.034	R	EVTSDSGSIVVSGLTPGVEYVYTIQVLR	D			f69txb20.7377.7377.3
1	P02751	Fibronectin OS=Homo sapiens GN=FN1 PE=1 SV=4	9998	266052	544	415	154	139	18275	1	1	0	1002.87	3005.59	3	3005.59	0	1	24.53	0.02	R	DLEVVAATPTSLLISWDAPAVTVRYYR	I			F80CXA20_1.8557.8557.3
1	P02751	Fibronectin OS=Homo sapiens GN=FN1 PE=1 SV=4	9998	266052	544	415	154	139	18276	1	1	0	1002.87	3005.59	3	3005.59	0	1	28.5	0.0078	R	DLEVVAATPTSLLISWDAPAVTVRYYR	I			F80CXA20_2.8473.8473.3
1	P02751	Fibronectin OS=Homo sapiens GN=FN1 PE=1 SV=4	9998	266052	544	415	154	139	18362	1	1	0	1521.8	3041.58	2	3041.58	0	0	23.83	0.02	K	VVTPLSPPTNLHLEANPDTGVLTVSWER	S			F80TXA20.7581.7581.2
1	P02751	Fibronectin OS=Homo sapiens GN=FN1 PE=1 SV=4	9998	266052	544	415	154	139	18363	1	1	0	1521.8	3041.58	2	3041.58	0	0	41.28	0.00036	K	VVTPLSPPTNLHLEANPDTGVLTVSWER	S			F80TXB20.7564.7564.2
1	P02751	Fibronectin OS=Homo sapiens GN=FN1 PE=1 SV=4	9998	266052	544	415	154	139	18364	1	1	0	1014.87	3041.59	3	3041.58	0	0	35.39	0.0013	K	VVTPLSPPTNLHLEANPDTGVLTVSWER	S			f69txa20.7188.7188.3
1	P02751	Fibronectin OS=Homo sapiens GN=FN1 PE=1 SV=4	9998	266052	544	415	154	139	18365	1	1	0	1014.87	3041.59	3	3041.58	0	0	21.32	0.032	K	VVTPLSPPTNLHLEANPDTGVLTVSWER	S			m84txb20.6880.6880.3
1	P02751	Fibronectin OS=Homo sapiens GN=FN1 PE=1 SV=4	9998	266052	544	415	154	139	18397	1	1	0	1020.2	3057.58	3	3057.57	0	1	27.88	0.0086	R	FTNIGPDTMRVTWAPPPSIDLTNFLVR	Y			2_F80CXA20_1.8502.8502.3
1	P02751	Fibronectin OS=Homo sapiens GN=FN1 PE=1 SV=4	9998	266052	544	415	154	139	18398	1	1	0	1020.2	3057.58	3	3057.57	0	1	33.51	0.0024	R	FTNIGPDTMRVTWAPPPSIDLTNFLVR	Y			F80CXA20_1.8549.8549.3
1	P02751	Fibronectin OS=Homo sapiens GN=FN1 PE=1 SV=4	9998	266052	544	415	154	139	18530	1	1	0	1034.44	3100.31	3	3100.31	0	1	35.89	0.00044	R	CDNCRRPGGEPSPEGTTGQSYNQYSQR	Y			F80TXA20.2792.2792.3
1	P02751	Fibronectin OS=Homo sapiens GN=FN1 PE=1 SV=4	9998	266052	544	415	154	139	18531	1	1	0	1034.44	3100.31	3	3100.31	0	1	25.95	0.0043	R	CDNCRRPGGEPSPEGTTGQSYNQYSQR	Y			F80TXB20.2791.2791.3
1	P02751	Fibronectin OS=Homo sapiens GN=FN1 PE=1 SV=4	9998	266052	544	415	154	139	18532	1	1	0	776.09	3100.31	4	3100.31	0	1	27.65	0.0029	R	CDNCRRPGGEPSPEGTTGQSYNQYSQR	Y			f69txb20.2341.2341.4
1	P02751	Fibronectin OS=Homo sapiens GN=FN1 PE=1 SV=4	9998	266052	544	415	154	139	18533	1	1	0	776.09	3100.31	4	3100.31	0	1	30.76	0.0014	R	CDNCRRPGGEPSPEGTTGQSYNQYSQR	Y			f69txa20.2516.2516.4
1	P02751	Fibronectin OS=Homo sapiens GN=FN1 PE=1 SV=4	9998	266052	544	415	154	139	18768	1	1	0	1057.23	3168.66	3	3168.66	0	1	21.76	0.033	K	EINLAPDSSSVVVSGLMVATKYEVSVYALK	D			2_F80CXA20_2.8642.8642.3
1	P02751	Fibronectin OS=Homo sapiens GN=FN1 PE=1 SV=4	9998	266052	544	415	154	139	18769	1	1	0	1057.23	3168.66	3	3168.66	0	1	12.22	0.3	K	EINLAPDSSSVVVSGLMVATKYEVSVYALK	D			m84cxa20.8460.8460.3
1	P02751	Fibronectin OS=Homo sapiens GN=FN1 PE=1 SV=4	9998	266052	544	415	154	139	18785	1	1	0	635.72	3173.58	5	3173.58	0	1	21.19	0.06	R	QKTGLDSPTGIDFSDITANSFTVHWIAPR	A			F80CXA20_1.7810.7810.5
1	P02751	Fibronectin OS=Homo sapiens GN=FN1 PE=1 SV=4	9998	266052	544	415	154	139	18796	1	1	0	1060.45	3178.33	3	3178.33	0.01	1	47.94	3.5e-05	R	WKCDPVDQCQDSETGTFYQIGDSWEK	Y			m84txa20.5686.5686.3
1	P02751	Fibronectin OS=Homo sapiens GN=FN1 PE=1 SV=4	9998	266052	544	415	154	139	18797	1	1	0	1060.45	3178.33	3	3178.33	0.01	1	58.94	2.7e-06	R	WKCDPVDQCQDSETGTFYQIGDSWEK	Y			2_F80TXA20.6386.6386.3
1	P02751	Fibronectin OS=Homo sapiens GN=FN1 PE=1 SV=4	9998	266052	544	415	154	139	18822	1	1	0	1063.24	3186.69	3	3186.69	0	0	8.22	0.53	K	TDELPQLVTLPHPNLHGPEILDVPSTVQK	T			f69txa20.6954.6954.3
1	P02751	Fibronectin OS=Homo sapiens GN=FN1 PE=1 SV=4	9998	266052	544	415	154	139	18823	1	1	0	1063.24	3186.69	3	3186.69	0	0	20.48	0.031	K	TDELPQLVTLPHPNLHGPEILDVPSTVQK	T			F80TXA20.7381.7381.3
1	P02751	Fibronectin OS=Homo sapiens GN=FN1 PE=1 SV=4	9998	266052	544	415	154	139	18824	1	1	0	797.68	3186.69	4	3186.69	0	0	15.04	0.096	K	TDELPQLVTLPHPNLHGPEILDVPSTVQK	T			F80CXA20_1.7374.7374.4
1	P02751	Fibronectin OS=Homo sapiens GN=FN1 PE=1 SV=4	9998	266052	544	415	154	139	18825	1	1	0	797.68	3186.69	4	3186.69	0	0	24.33	0.011	K	TDELPQLVTLPHPNLHGPEILDVPSTVQK	T			2_F80CXA20_1.7353.7353.4
1	P02751	Fibronectin OS=Homo sapiens GN=FN1 PE=1 SV=4	9998	266052	544	415	154	139	18977	1	1	0	813.18	3248.67	4	3248.68	0	1	11.37	0.55	K	ESVPISDTIIPAVPPPTDLRFTNIGPDTMR	V			F80CXA20_2.7739.7739.4
1	P02751	Fibronectin OS=Homo sapiens GN=FN1 PE=1 SV=4	9998	266052	544	415	154	139	18978	1	1	0	813.18	3248.67	4	3248.68	0	1	7.4	1.4	K	ESVPISDTIIPAVPPPTDLRFTNIGPDTMR	V			2_F80CXA20_2.7777.7777.4
1	P02751	Fibronectin OS=Homo sapiens GN=FN1 PE=1 SV=4	9998	266052	544	415	154	139	18979	1	1	0	1083.9	3248.68	3	3248.68	0	1	27.06	0.015	K	ESVPISDTIIPAVPPPTDLRFTNIGPDTMR	V			2_F80CXA20_2.7768.7768.3
1	P02751	Fibronectin OS=Homo sapiens GN=FN1 PE=1 SV=4	9998	266052	544	415	154	139	18980	1	1	0	1083.9	3248.68	3	3248.68	0	1	32.99	0.0039	K	ESVPISDTIIPAVPPPTDLRFTNIGPDTMR	V			F80TXB20.7827.7827.3
1	P02751	Fibronectin OS=Homo sapiens GN=FN1 PE=1 SV=4	9998	266052	544	415	154	139	19156	1	1	0	663.97	3314.79	5	3314.79	0	1	10.62	0.18	K	KTDELPQLVTLPHPNLHGPEILDVPSTVQK	T			F80CXA20_1.7015.7015.5
1	P02751	Fibronectin OS=Homo sapiens GN=FN1 PE=1 SV=4	9998	266052	544	415	154	139	19157	1	1	0	663.97	3314.79	5	3314.79	0	1	11.19	0.16	K	KTDELPQLVTLPHPNLHGPEILDVPSTVQK	T			2_F80TXB20.6974.6974.5
1	P02751	Fibronectin OS=Homo sapiens GN=FN1 PE=1 SV=4	9998	266052	544	415	154	139	19158	1	1	0	829.71	3314.8	4	3314.79	0.01	1	41.94	0.00011	K	KTDELPQLVTLPHPNLHGPEILDVPSTVQK	T			2_F80CXA20_1.7002.7002.4
1	P02751	Fibronectin OS=Homo sapiens GN=FN1 PE=1 SV=4	9998	266052	544	415	154	139	19159	1	1	0	829.71	3314.8	4	3314.79	0.01	1	35.11	0.00051	K	KTDELPQLVTLPHPNLHGPEILDVPSTVQK	T			f69cxa20.6322.6322.4
1	P02751	Fibronectin OS=Homo sapiens GN=FN1 PE=1 SV=4	9998	266052	544	415	154	139	19343	1	1	0	1130.93	3389.78	3	3389.78	-0.01	1	48.76	3.9e-05	K	YEVSVYALKDTLTSRPAQGVVTTLENVSPPR	R			F80TXB20.7418.7418.3
1	P02751	Fibronectin OS=Homo sapiens GN=FN1 PE=1 SV=4	9998	266052	544	415	154	139	19344	1	1	0	1130.93	3389.78	3	3389.78	-0.01	1	33.09	0.0014	K	YEVSVYALKDTLTSRPAQGVVTTLENVSPPR	R			F80CXA20_1.7405.7405.3
1	P02751	Fibronectin OS=Homo sapiens GN=FN1 PE=1 SV=4	9998	266052	544	415	154	139	19345	1	1	0	848.45	3389.78	4	3389.78	0	1	9.99	0.28	K	YEVSVYALKDTLTSRPAQGVVTTLENVSPPR	R			F80TXA20.7401.7401.4
1	P02751	Fibronectin OS=Homo sapiens GN=FN1 PE=1 SV=4	9998	266052	544	415	154	139	19346	1	1	0	848.45	3389.78	4	3389.78	0	1	18.84	0.037	K	YEVSVYALKDTLTSRPAQGVVTTLENVSPPR	R			2_F80CXA20_1.7372.7372.4
1	P02751	Fibronectin OS=Homo sapiens GN=FN1 PE=1 SV=4	9998	266052	544	415	154	139	19373	1	1	0	1133.81	3398.42	3	3398.42	0	1	39.21	0.00021	R	TFYSCTTEGRQDGHLWCSTTSNYEQDQK	Y			F80TXB20.4612.4612.3
1	P02751	Fibronectin OS=Homo sapiens GN=FN1 PE=1 SV=4	9998	266052	544	415	154	139	19374	1	1	0	1133.81	3398.42	3	3398.42	0	1	37.91	0.00028	R	TFYSCTTEGRQDGHLWCSTTSNYEQDQK	Y			f69txb20.3955.3955.3
1	P02751	Fibronectin OS=Homo sapiens GN=FN1 PE=1 SV=4	9998	266052	544	415	154	139	19375	1	1	0	850.61	3398.42	4	3398.42	0	1	10.55	0.16	R	TFYSCTTEGRQDGHLWCSTTSNYEQDQK	Y			f69txb20.3954.3954.4
1	P02751	Fibronectin OS=Homo sapiens GN=FN1 PE=1 SV=4	9998	266052	544	415	154	139	19376	1	1	0	850.61	3398.42	4	3398.42	0	1	17.41	0.033	R	TFYSCTTEGRQDGHLWCSTTSNYEQDQK	Y			m84cxa20.4401.4401.4
1	P02751	Fibronectin OS=Homo sapiens GN=FN1 PE=1 SV=4	9998	266052	544	415	154	139	19413	1	1	0	855.44	3417.75	4	3417.75	0	1	1.58	4.3	K	VTIMWTPPESAVTGYRVDVIPVNLPGEHGQR	L			2_F80TXB20.7465.7465.4
1	P02751	Fibronectin OS=Homo sapiens GN=FN1 PE=1 SV=4	9998	266052	544	415	154	139	19553	1	1	0	1157.3	3468.89	3	3468.89	0	0	33.01	0.0013	R	EVVPRPRPGVTEATITGLEPGTEYTIYVIALK	N			F80TXA20.7696.7696.3
1	P02751	Fibronectin OS=Homo sapiens GN=FN1 PE=1 SV=4	9998	266052	544	415	154	139	19554	1	1	0	1157.3	3468.89	3	3468.89	0	0	33.76	0.0011	R	EVVPRPRPGVTEATITGLEPGTEYTIYVIALK	N			2_F80TXA20.7761.7761.3
1	P02751	Fibronectin OS=Homo sapiens GN=FN1 PE=1 SV=4	9998	266052	544	415	154	139	19555	1	1	0	868.23	3468.89	4	3468.89	0	0	42.96	0.00013	R	EVVPRPRPGVTEATITGLEPGTEYTIYVIALK	N			F80TXB20.7704.7704.4
1	P02751	Fibronectin OS=Homo sapiens GN=FN1 PE=1 SV=4	9998	266052	544	415	154	139	19556	1	1	0	868.23	3468.89	4	3468.89	0	0	22.05	0.017	R	EVVPRPRPGVTEATITGLEPGTEYTIYVIALK	N			2_F80TXB20.7655.7655.4
1	P02751	Fibronectin OS=Homo sapiens GN=FN1 PE=1 SV=4	9998	266052	544	415	154	139	19577	1	1	0	870.16	3476.61	4	3476.61	0	1	43.46	0.00033	R	RPHETGGYMLECVCLGNGKGEWTCKPIAEK	C			F80CXA20_2.5264.5264.4
1	P02751	Fibronectin OS=Homo sapiens GN=FN1 PE=1 SV=4	9998	266052	544	415	154	139	19578	1	1	0	870.16	3476.61	4	3476.61	0	1	44.53	0.00026	R	RPHETGGYMLECVCLGNGKGEWTCKPIAEK	C			F80TXA20.5278.5278.4
1	P02751	Fibronectin OS=Homo sapiens GN=FN1 PE=1 SV=4	9998	266052	544	415	154	139	19579	1	1	0	696.33	3476.62	5	3476.61	0.01	1	17.25	0.14	R	RPHETGGYMLECVCLGNGKGEWTCKPIAEK	C			F80CXA20_1.5326.5326.5
1	P02751	Fibronectin OS=Homo sapiens GN=FN1 PE=1 SV=4	9998	266052	544	415	154	139	19580	1	1	0	696.33	3476.62	5	3476.61	0.01	1	10.82	0.61	R	RPHETGGYMLECVCLGNGKGEWTCKPIAEK	C			F80TXA20.5296.5296.5
1	P02751	Fibronectin OS=Homo sapiens GN=FN1 PE=1 SV=4	9998	266052	544	415	154	139	19786	1	1	0	1185.27	3552.79	3	3552.79	0	1	52.99	2.9e-05	R	EVTSDSGSIVVSGLTPGVEYVYTIQVLRDGQER	D			F80CXA20_2.7720.7720.3
1	P02751	Fibronectin OS=Homo sapiens GN=FN1 PE=1 SV=4	9998	266052	544	415	154	139	19787	1	1	0	1185.27	3552.79	3	3552.79	0	1	40.88	0.00047	R	EVTSDSGSIVVSGLTPGVEYVYTIQVLRDGQER	D			F80CXA20_1.7768.7768.3
1	P02751	Fibronectin OS=Homo sapiens GN=FN1 PE=1 SV=4	9998	266052	544	415	154	139	19788	1	1	0	1185.27	3552.8	3	3552.79	0	1	54.84	2e-05	R	EVTSDSGSIVVSGLTPGVEYVYTIQVLRDGQER	D			F80TXB20.7950.7950.3
1	P02751	Fibronectin OS=Homo sapiens GN=FN1 PE=1 SV=4	9998	266052	544	415	154	139	19789	1	1	0	1185.27	3552.8	3	3552.79	0	1	53.52	2.7e-05	R	EVTSDSGSIVVSGLTPGVEYVYTIQVLRDGQER	D			2_F80TXB20.7884.7884.3
1	P02751	Fibronectin OS=Homo sapiens GN=FN1 PE=1 SV=4	9998	266052	544	415	154	139	19792	1	1	0	889.21	3552.8	4	3552.79	0	1	25.4	0.017	R	EVTSDSGSIVVSGLTPGVEYVYTIQVLRDGQER	D			F80CXA20_1.7900.7900.4
1	P02751	Fibronectin OS=Homo sapiens GN=FN1 PE=1 SV=4	9998	266052	544	415	154	139	19793	1	1	0	889.21	3552.8	4	3552.79	0	1	11.66	0.4	R	EVTSDSGSIVVSGLTPGVEYVYTIQVLRDGQER	D			F80TXA20.7955.7955.4
1	P02751	Fibronectin OS=Homo sapiens GN=FN1 PE=1 SV=4	9998	266052	544	415	154	139	19848	1	1	0	1192.85	3575.53	3	3575.54	-0.01	1	37.09	0.00022	K	CDPVDQCQDSETGTFYQIGDSWEKYVHGVR	Y			F80TXB20.7330.7330.3
1	P02751	Fibronectin OS=Homo sapiens GN=FN1 PE=1 SV=4	9998	266052	544	415	154	139	19849	1	1	0	1192.85	3575.53	3	3575.54	-0.01	1	60.03	1.1e-06	K	CDPVDQCQDSETGTFYQIGDSWEKYVHGVR	Y			2_F80TXA20.7365.7365.3
1	P02751	Fibronectin OS=Homo sapiens GN=FN1 PE=1 SV=4	9998	266052	544	415	154	139	19850	1	1	0	894.89	3575.54	4	3575.54	0	1	58.53	1.8e-06	K	CDPVDQCQDSETGTFYQIGDSWEKYVHGVR	Y			f69txb20.6428.6428.4
1	P02751	Fibronectin OS=Homo sapiens GN=FN1 PE=1 SV=4	9998	266052	544	415	154	139	19851	1	1	0	894.89	3575.54	4	3575.54	0	1	47.4	2.4e-05	K	CDPVDQCQDSETGTFYQIGDSWEKYVHGVR	Y			m84txa20.6600.6600.4
1	P02751	Fibronectin OS=Homo sapiens GN=FN1 PE=1 SV=4	9998	266052	544	415	154	139	20002	1	1	0	1216.26	3645.76	3	3645.76	0	0	8.29	1.1	R	VEYELSEEGDEPQYLDLPSTATSVNIPDLLPGR	K			F80CXA20_1.8043.8043.3
1	P02751	Fibronectin OS=Homo sapiens GN=FN1 PE=1 SV=4	9998	266052	544	415	154	139	20200	1	1	0	1258.96	3773.86	3	3773.85	0	1	55.43	1.8e-05	R	VEYELSEEGDEPQYLDLPSTATSVNIPDLLPGRK	Y			2_F80TXA20.7781.7781.3
1	P02751	Fibronectin OS=Homo sapiens GN=FN1 PE=1 SV=4	9998	266052	544	415	154	139	20201	1	1	0	1258.96	3773.86	3	3773.85	0	1	66.35	1.5e-06	R	VEYELSEEGDEPQYLDLPSTATSVNIPDLLPGRK	Y			f69cxa20_100930142853.7031.7031.3
1	P02751	Fibronectin OS=Homo sapiens GN=FN1 PE=1 SV=4	9998	266052	544	415	154	139	20202	1	1	0	944.47	3773.86	4	3773.85	0.01	1	33.94	0.0024	R	VEYELSEEGDEPQYLDLPSTATSVNIPDLLPGRK	Y			F80TXB20.7730.7730.4
1	P02751	Fibronectin OS=Homo sapiens GN=FN1 PE=1 SV=4	9998	266052	544	415	154	139	20203	1	1	0	944.47	3773.86	4	3773.85	0.01	1	33.29	0.0028	R	VEYELSEEGDEPQYLDLPSTATSVNIPDLLPGRK	Y			F80CXA20_1.7707.7707.4
1	P02751	Fibronectin OS=Homo sapiens GN=FN1 PE=1 SV=4	9998	266052	544	415	154	139	20215	1	1	0	945.75	3778.99	4	3778.99	0	1	16.37	0.054	R	DAPIVNKVVTPLSPPTNLHLEANPDTGVLTVSWER	S			F80TXB20.7603.7603.4
1	P02751	Fibronectin OS=Homo sapiens GN=FN1 PE=1 SV=4	9998	266052	544	415	154	139	20216	1	1	0	945.75	3778.99	4	3778.99	0	1	22.62	0.013	R	DAPIVNKVVTPLSPPTNLHLEANPDTGVLTVSWER	S			f69cxb20.6942.6942.4
1	P02751	Fibronectin OS=Homo sapiens GN=FN1 PE=1 SV=4	9998	266052	544	415	154	139	20217	1	1	0	1260.67	3778.99	3	3778.99	0	1	48.07	3.7e-05	R	DAPIVNKVVTPLSPPTNLHLEANPDTGVLTVSWER	S			F80TXA20.7601.7601.3
1	P02751	Fibronectin OS=Homo sapiens GN=FN1 PE=1 SV=4	9998	266052	544	415	154	139	20218	1	1	0	1260.67	3778.99	3	3778.99	0	1	61.56	1.6e-06	R	DAPIVNKVVTPLSPPTNLHLEANPDTGVLTVSWER	S			F80TXB20.7590.7590.3
1	P02751	Fibronectin OS=Homo sapiens GN=FN1 PE=1 SV=4	9998	266052	544	415	154	139	20236	1	1	0	948.97	3791.87	4	3791.87	0	1	21.55	0.042	R	TEIDKPSQMQVTDVQDNSISVKWLPSSSPVTGYR	V			F80CXA20_2.6473.6473.4
1	P02751	Fibronectin OS=Homo sapiens GN=FN1 PE=1 SV=4	9998	266052	544	415	154	139	20237	1	1	0	948.97	3791.87	4	3791.87	0	1	21.42	0.044	R	TEIDKPSQMQVTDVQDNSISVKWLPSSSPVTGYR	V			2_F80CXA20_2.6504.6504.4
1	P02751	Fibronectin OS=Homo sapiens GN=FN1 PE=1 SV=4	9998	266052	544	415	154	139	20238	1	1	0	1264.97	3791.89	3	3791.87	0.03	1	15.94	0.12	R	TEIDKPSQMQVTDVQDNSISVKWLPSSSPVTGYR	V			2_F80CXA20_1.6521.6521.3
1	P02751	Fibronectin OS=Homo sapiens GN=FN1 PE=1 SV=4	9998	266052	544	415	154	139	20243	1	1	0	949.21	3792.82	4	3792.82	0	0	10.73	0.5	R	AAVYQPQPHPQPPPYGHCVTDSGVVYSVGMQWLK	T			2_F80TXB20.6952.6952.4
1	P02751	Fibronectin OS=Homo sapiens GN=FN1 PE=1 SV=4	9998	266052	544	415	154	139	20244	1	1	0	949.21	3792.82	4	3792.82	0	0	13.41	0.27	R	AAVYQPQPHPQPPPYGHCVTDSGVVYSVGMQWLK	T			f69cxb20.6403.6403.4
1	P02751	Fibronectin OS=Homo sapiens GN=FN1 PE=1 SV=4	9998	266052	544	415	154	139	20245	1	1	0	1265.28	3792.82	3	3792.82	0	0	25.56	0.016	R	AAVYQPQPHPQPPPYGHCVTDSGVVYSVGMQWLK	T			F80TXB20.7024.7024.3
1	P02751	Fibronectin OS=Homo sapiens GN=FN1 PE=1 SV=4	9998	266052	544	415	154	139	20246	1	1	0	1265.28	3792.82	3	3792.82	0	0	38.16	0.00087	R	AAVYQPQPHPQPPPYGHCVTDSGVVYSVGMQWLK	T			F80TXA20.6997.6997.3
1	P02751	Fibronectin OS=Homo sapiens GN=FN1 PE=1 SV=4	9998	266052	544	415	154	139	20266	1	1	0	953.21	3808.82	4	3808.81	0.01	0	6.21	1.3	R	AAVYQPQPHPQPPPYGHCVTDSGVVYSVGMQWLK	T	Oxidation (M)	0.0000000000000000000000000000010000.0	2_F80CXA20_2.6463.6463.4
1	P02751	Fibronectin OS=Homo sapiens GN=FN1 PE=1 SV=4	9998	266052	544	415	154	139	20267	1	1	0	953.21	3808.82	4	3808.81	0.01	0	12.07	0.34	R	AAVYQPQPHPQPPPYGHCVTDSGVVYSVGMQWLK	T	Oxidation (M)	0.0000000000000000000000000000010000.0	F80CXA20_2.6436.6436.4
1	P02751	Fibronectin OS=Homo sapiens GN=FN1 PE=1 SV=4	9998	266052	544	415	154	139	20391	1	1	0	976.94	3903.73	4	3903.72	0.01	1	5.62	0.51	R	QDGHLWCSTTSNYEQDQKYSFCTDHTVLVQTR	G			2_F80TXA20.5472.5472.4
1	P02751	Fibronectin OS=Homo sapiens GN=FN1 PE=1 SV=4	9998	266052	544	415	154	139	20392	1	1	0	976.94	3903.73	4	3903.72	0.01	1	19.3	0.022	R	QDGHLWCSTTSNYEQDQKYSFCTDHTVLVQTR	G			f69cxa20.4752.4752.4
1	P02751	Fibronectin OS=Homo sapiens GN=FN1 PE=1 SV=4	9998	266052	544	415	154	139	20445	1	1	0	989.29	3953.13	4	3953.13	0.01	1	58.74	2.2e-06	R	EVVPRPRPGVTEATITGLEPGTEYTIYVIALKNNQK	S			2_F80CXA20_1.7016.7016.4
1	P02751	Fibronectin OS=Homo sapiens GN=FN1 PE=1 SV=4	9998	266052	544	415	154	139	20446	1	1	0	989.29	3953.13	4	3953.13	0.01	1	80.04	1.6e-08	R	EVVPRPRPGVTEATITGLEPGTEYTIYVIALKNNQK	S			F80CXA20_1.7021.7021.4
1	P02751	Fibronectin OS=Homo sapiens GN=FN1 PE=1 SV=4	9998	266052	544	415	154	139	20447	1	1	0	791.64	3953.15	5	3953.13	0.02	1	12.77	0.077	R	EVVPRPRPGVTEATITGLEPGTEYTIYVIALKNNQK	S			F80CXA20_2.6997.6997.5
1	P02751	Fibronectin OS=Homo sapiens GN=FN1 PE=1 SV=4	9998	266052	544	415	154	139	20448	1	1	0	791.64	3953.15	5	3953.13	0.02	1	12.4	0.083	R	EVVPRPRPGVTEATITGLEPGTEYTIYVIALKNNQK	S			F80CXA20_1.7031.7031.5
1	P02751	Fibronectin OS=Homo sapiens GN=FN1 PE=1 SV=4	9998	266052	544	415	154	139	20558	1	1	0	1011.53	4042.09	4	4042.1	-0.01	1	25.77	0.013	K	STATISGLKPGVDYTITVYAVTGRGDSPASSKPISINYR	T			F80CXA20_1.6491.6491.4
1	P02751	Fibronectin OS=Homo sapiens GN=FN1 PE=1 SV=4	9998	266052	544	415	154	139	20559	1	1	0	1011.53	4042.09	4	4042.1	-0.01	1	20.87	0.04	K	STATISGLKPGVDYTITVYAVTGRGDSPASSKPISINYR	T			F80TXA20.6454.6454.4
1	P02751	Fibronectin OS=Homo sapiens GN=FN1 PE=1 SV=4	9998	266052	544	415	154	139	20560	1	1	0	809.43	4042.1	5	4042.1	0	1	3.07	2.4	K	STATISGLKPGVDYTITVYAVTGRGDSPASSKPISINYR	T			F80CXA20_2.6453.6453.5
1	P02751	Fibronectin OS=Homo sapiens GN=FN1 PE=1 SV=4	9998	266052	544	415	154	139	20561	1	1	0	809.43	4042.1	5	4042.1	0	1	13.69	0.21	K	STATISGLKPGVDYTITVYAVTGRGDSPASSKPISINYR	T			2_F80TXA20.6534.6534.5
1	P02751	Fibronectin OS=Homo sapiens GN=FN1 PE=1 SV=4	9998	266052	544	415	154	139	20696	1	1	0	1047.7	4186.75	4	4186.74	0.01	1	21.25	0.0075	K	WCGTTQNYDADQKFGFCPMAAHEEICTTNEGVMYR	I			2_F80CXA20_1.6184.6184.4
1	P02751	Fibronectin OS=Homo sapiens GN=FN1 PE=1 SV=4	9998	266052	544	415	154	139	20697	1	1	0	1047.7	4186.75	4	4186.74	0.01	1	14.1	0.039	K	WCGTTQNYDADQKFGFCPMAAHEEICTTNEGVMYR	I			F80CXA20_1.6192.6192.4
1	P02751	Fibronectin OS=Homo sapiens GN=FN1 PE=1 SV=4	9998	266052	544	415	154	139	20743	1	1	0	1061.2	4240.77	4	4240.78	-0.01	0	24.02	0.004	K	CFDHAAGTSYVVGETWEKPYQGWMMVDCTCLGEGSGR	I			F80CXA20_1.7208.7208.4
1	P02751	Fibronectin OS=Homo sapiens GN=FN1 PE=1 SV=4	9998	266052	544	415	154	139	20744	1	1	0	1061.2	4240.77	4	4240.78	-0.01	0	29.91	0.001	K	CFDHAAGTSYVVGETWEKPYQGWMMVDCTCLGEGSGR	I			F80CXA20_2.7161.7161.4
1	P02751	Fibronectin OS=Homo sapiens GN=FN1 PE=1 SV=4	9998	266052	544	415	154	139	20830	1	1	0	865.66	4323.28	5	4323.27	0.01	1	17.04	0.043	K	EATIPGHLNSYTIKGLKPGVVYEGQLISIQQYGHQEVTR	F			2_F80CXA20_1.6411.6411.5
1	P02751	Fibronectin OS=Homo sapiens GN=FN1 PE=1 SV=4	9998	266052	544	415	154	139	20831	1	1	0	865.66	4323.28	5	4323.27	0.01	1	20.68	0.019	K	EATIPGHLNSYTIKGLKPGVVYEGQLISIQQYGHQEVTR	F			2_F80CXA20_2.6382.6382.5
1	P02751	Fibronectin OS=Homo sapiens GN=FN1 PE=1 SV=4	9998	266052	544	415	154	139	20885	1	1	0	1472.32	4413.93	3	4413.92	0.01	0	40.33	9.3e-05	R	EEVVTVGNSVNEGLNQPTDDSCFDPYTVSHYAVGDEWER	M			F80TXA20.6849.6849.3
1	P02751	Fibronectin OS=Homo sapiens GN=FN1 PE=1 SV=4	9998	266052	544	415	154	139	20886	1	1	0	1472.32	4413.93	3	4413.92	0.01	0	16.69	0.021	R	EEVVTVGNSVNEGLNQPTDDSCFDPYTVSHYAVGDEWER	M			m84cxa20.6580.6580.3
1	P02751	Fibronectin OS=Homo sapiens GN=FN1 PE=1 SV=4	9998	266052	544	415	154	139	20887	1	1	0	1104.49	4413.93	4	4413.92	0.01	0	4.33	0.37	R	EEVVTVGNSVNEGLNQPTDDSCFDPYTVSHYAVGDEWER	M			f69txa20.6452.6452.4
1	P02751	Fibronectin OS=Homo sapiens GN=FN1 PE=1 SV=4	9998	266052	544	415	154	139	20888	1	1	0	1104.49	4413.93	4	4413.92	0.01	0	13.97	0.04	R	EEVVTVGNSVNEGLNQPTDDSCFDPYTVSHYAVGDEWER	M			f69txa20.6439.6439.4
1	P02751	Fibronectin OS=Homo sapiens GN=FN1 PE=1 SV=4	9998	266052	544	415	154	139	20910	1	1	0	1480.98	4439.93	3	4439.93	0	0	7.49	0.18	K	QMLCTCLGNGVSCQETAVTQTYGGNSNGEPCVLPFTYNGR	T			F80TXA20.7152.7152.3
1	P02751	Fibronectin OS=Homo sapiens GN=FN1 PE=1 SV=4	9998	266052	544	415	154	139	20912	1	1	0	1110.99	4439.93	4	4439.93	0	0	13.67	0.043	K	QMLCTCLGNGVSCQETAVTQTYGGNSNGEPCVLPFTYNGR	T			F80TXA20.7074.7074.4
1	P02751	Fibronectin OS=Homo sapiens GN=FN1 PE=1 SV=4	9998	266052	544	415	154	139	20913	1	1	0	1110.99	4439.93	4	4439.93	0	0	21.95	0.0064	K	QMLCTCLGNGVSCQETAVTQTYGGNSNGEPCVLPFTYNGR	T			2_F80CXA20_1.7076.7076.4
1	P02751	Fibronectin OS=Homo sapiens GN=FN1 PE=1 SV=4	9998	266052	544	415	154	139	20937	1	1	0	1487.46	4459.35	3	4459.35	0	1	8.68	0.14	R	EESPLLIGQQSTVSDVPRDLEVVAATPTSLLISWDAPAVTVR	Y			F80CXA20_2.9008.9008.3
1	P02751	Fibronectin OS=Homo sapiens GN=FN1 PE=1 SV=4	9998	266052	544	415	154	139	20938	1	1	0	1487.46	4459.35	3	4459.35	0	1	33.87	0.00041	R	EESPLLIGQQSTVSDVPRDLEVVAATPTSLLISWDAPAVTVR	Y			F80TXA20.9143.9143.3
1	P02751	Fibronectin OS=Homo sapiens GN=FN1 PE=1 SV=4	9998	266052	544	415	154	139	20939	1	1	0	1115.84	4459.35	4	4459.35	0	1	9.94	0.1	R	EESPLLIGQQSTVSDVPRDLEVVAATPTSLLISWDAPAVTVR	Y			F80TXB20.9135.9135.4
1	P02751	Fibronectin OS=Homo sapiens GN=FN1 PE=1 SV=4	9998	266052	544	415	154	139	20940	1	1	0	1115.84	4459.35	4	4459.35	0	1	8.85	0.13	R	EESPLLIGQQSTVSDVPRDLEVVAATPTSLLISWDAPAVTVR	Y			f69cxb20.8428.8428.4
1	P02751	Fibronectin OS=Homo sapiens GN=FN1 PE=1 SV=4	9998	266052	544	415	154	139	20951	1	1	0	1490.12	4467.35	3	4467.35	0	1	7.8	0.29	R	NSITLTNLTPGTEYVVSIVALNGREESPLLIGQQSTVSDVPR	D			2_F80CXA20_2.8408.8408.3
1	P02751	Fibronectin OS=Homo sapiens GN=FN1 PE=1 SV=4	9998	266052	544	415	154	139	20952	1	1	0	1490.12	4467.35	3	4467.35	0	1	20.37	0.016	R	NSITLTNLTPGTEYVVSIVALNGREESPLLIGQQSTVSDVPR	D			f69txa20.8116.8116.3
1	P02751	Fibronectin OS=Homo sapiens GN=FN1 PE=1 SV=4	9998	266052	544	415	154	139	20953	1	1	0	1117.85	4467.35	4	4467.35	0	1	23.09	0.0086	R	NSITLTNLTPGTEYVVSIVALNGREESPLLIGQQSTVSDVPR	D			f69txa20.8111.8111.4
1	P02751	Fibronectin OS=Homo sapiens GN=FN1 PE=1 SV=4	9998	266052	544	415	154	139	20954	1	1	0	1117.85	4467.35	4	4467.35	0	1	10.49	0.16	R	NSITLTNLTPGTEYVVSIVALNGREESPLLIGQQSTVSDVPR	D			f69cxb20.7780.7780.4
1	P02751	Fibronectin OS=Homo sapiens GN=FN1 PE=1 SV=4	9998	266052	544	415	154	139	21117	1	1	0	1168.28	4669.09	4	4669.09	0	1	18.21	0.035	K	VREEVVTVGNSVNEGLNQPTDDSCFDPYTVSHYAVGDEWER	M			2_F80TXB20.6551.6551.4
1	P02751	Fibronectin OS=Homo sapiens GN=FN1 PE=1 SV=4	9998	266052	544	415	154	139	21118	1	1	0	1168.28	4669.09	4	4669.09	0	1	33.57	0.001	K	VREEVVTVGNSVNEGLNQPTDDSCFDPYTVSHYAVGDEWER	M			2_F80CXA20_1.6630.6630.4
1	P02751	Fibronectin OS=Homo sapiens GN=FN1 PE=1 SV=4	9998	266052	544	415	154	139	21257	1	1	0	1222.6	4886.37	4	4886.4	-0.03	0	24.91	0.0094	K	NEEDVAELSISPSDNAVVLTNLLPGTEYVVSVSSVYEQHESTPLR	G			F80TXA20.8786.8786.4
1	P02751	Fibronectin OS=Homo sapiens GN=FN1 PE=1 SV=4	9998	266052	544	415	154	139	21258	1	1	0	1222.6	4886.37	4	4886.4	-0.03	0	6.74	0.61	K	NEEDVAELSISPSDNAVVLTNLLPGTEYVVSVSSVYEQHESTPLR	G			2_F80CXA20_1.8679.8679.4
1	P02751	Fibronectin OS=Homo sapiens GN=FN1 PE=1 SV=4	9998	266052	544	415	154	139	21406	1	1	0	1032.51	5157.5	5	5157.55	-0.04	0	22.83	0.017	K	TAGPDQTEMTIEGLQPTVEYVVSVYAQNPSGESQPLVQTAVTNIDRPK	G			2_F80TXA20.8446.8446.5
1	P02751	Fibronectin OS=Homo sapiens GN=FN1 PE=1 SV=4	9998	266052	544	415	154	139	21407	1	1	0	1032.51	5157.5	5	5157.55	-0.04	0	12.73	0.18	K	TAGPDQTEMTIEGLQPTVEYVVSVYAQNPSGESQPLVQTAVTNIDRPK	G			F80CXA20_2.8282.8282.5
1	P02751	Fibronectin OS=Homo sapiens GN=FN1 PE=1 SV=4	9998	266052	544	415	154	139	21408	1	1	0	1290.39	5157.54	4	5157.55	0	0	47.42	5.8e-05	K	TAGPDQTEMTIEGLQPTVEYVVSVYAQNPSGESQPLVQTAVTNIDRPK	G			F80CXA20_1.8355.8355.4
1	P02751	Fibronectin OS=Homo sapiens GN=FN1 PE=1 SV=4	9998	266052	544	415	154	139	21409	1	1	0	1290.39	5157.54	4	5157.55	0	0	53.84	1.3e-05	K	TAGPDQTEMTIEGLQPTVEYVVSVYAQNPSGESQPLVQTAVTNIDRPK	G			F80TXA20.8410.8410.4
1	P02751	Fibronectin OS=Homo sapiens GN=FN1 PE=1 SV=4	9998	266052	544	415	154	139	21536	1	1	0	1070.91	5349.51	5	5349.56	-0.05	0	8.43	0.35	R	GIGEWHCQPLQTYPSSSGPVEVFITETPSQPNSHPIQWNAPQPSHISK	Y			F80CXA20_2.6882.6882.5
1	P02751	Fibronectin OS=Homo sapiens GN=FN1 PE=1 SV=4	9998	266052	544	415	154	139	21537	1	1	0	1070.91	5349.51	5	5349.56	-0.05	0	8.89	0.32	R	GIGEWHCQPLQTYPSSSGPVEVFITETPSQPNSHPIQWNAPQPSHISK	Y			2_F80CXA20_1.6902.6902.5
1	P02751	Fibronectin OS=Homo sapiens GN=FN1 PE=1 SV=4	9998	266052	544	415	154	139	21651	1	1	0	1093.15	5460.7	5	5460.71	-0.01	1	11.75	0.21	R	YSPVKNEEDVAELSISPSDNAVVLTNLLPGTEYVVSVSSVYEQHESTPLR	G			F80CXA20_1.8524.8524.5
1	P02751	Fibronectin OS=Homo sapiens GN=FN1 PE=1 SV=4	9998	266052	544	415	154	139	21652	1	1	0	1093.15	5460.7	5	5460.71	-0.01	1	1.49	2.2	R	YSPVKNEEDVAELSISPSDNAVVLTNLLPGTEYVVSVSSVYEQHESTPLR	G			F80CXA20_1.8577.8577.5
2	E7ERA1	Uncharacterized protein OS=Homo sapiens GN=FN1 PE=4 SV=1	9737	265981	524	399	146	131	522	5	0	0	403.71	805.4	2	805.4	0	0	1.62	13	R	IGDTWSK	K			2_F80CXA20_1.9734.9734.2
2	E7ERA1	Uncharacterized protein OS=Homo sapiens GN=FN1 PE=4 SV=1	9737	265981	524	399	146	131	523	1	0	0	403.71	805.4	2	805.4	0	0	10.91	1.5	R	IGDTWSK	K			f69txa20.9558.9558.2
2	E7ERA1	Uncharacterized protein OS=Homo sapiens GN=FN1 PE=4 SV=1	9737	265981	524	399	146	131	524	2	0	0	403.71	805.4	2	805.4	0	0	3.72	7.8	R	IGDTWSK	K			f69cxa20.8577.8577.2
2	E7ERA1	Uncharacterized protein OS=Homo sapiens GN=FN1 PE=4 SV=1	9737	265981	524	399	146	131	525	1	0	0	403.71	805.4	2	805.4	0	0	6.57	4.1	R	IGDTWSK	K			f69cxa20_100930142853.8726.8726.2
2	E7ERA1	Uncharacterized protein OS=Homo sapiens GN=FN1 PE=4 SV=1	9737	265981	524	399	146	131	526	2	0	0	403.71	805.4	2	805.4	0	0	2.17	11	R	IGDTWSK	K			2_F80TXA20.99.99.2
2	E7ERA1	Uncharacterized protein OS=Homo sapiens GN=FN1 PE=4 SV=1	9737	265981	524	399	146	131	527	2	0	0	403.71	805.4	2	805.4	0	0	0.98	15	R	IGDTWSK	K			2_F80CXA20_2.98.98.2
2	E7ERA1	Uncharacterized protein OS=Homo sapiens GN=FN1 PE=4 SV=1	9737	265981	524	399	146	131	528	1	0	0	403.71	805.4	2	805.4	0	0	11.89	1.3	R	IGDTWSK	K			f69cxb20_100930171645.8903.8903.2
2	E7ERA1	Uncharacterized protein OS=Homo sapiens GN=FN1 PE=4 SV=1	9737	265981	524	399	146	131	529	1	0	0	403.71	805.4	2	805.4	0	0	11.84	1.3	R	IGDTWSK	K			f69cxa20.8762.8762.2
2	E7ERA1	Uncharacterized protein OS=Homo sapiens GN=FN1 PE=4 SV=1	9737	265981	524	399	146	131	530	1	0	0	403.71	805.4	2	805.4	0	0	46.43	0.00045	R	IGDTWSK	K			F80CXA20_2.3146.3146.2
2	E7ERA1	Uncharacterized protein OS=Homo sapiens GN=FN1 PE=4 SV=1	9737	265981	524	399	146	131	531	1	0	0	403.71	805.4	2	805.4	0	0	40.09	0.0019	R	IGDTWSK	K			2_F80CXA20_2.3181.3181.2
2	E7ERA1	Uncharacterized protein OS=Homo sapiens GN=FN1 PE=4 SV=1	9737	265981	524	399	146	131	543	1	0	0	404.25	806.49	2	806.49	0	0	35.6	0.00067	R	ITGYIIK	Y			F80TXA20.4448.4448.2
2	E7ERA1	Uncharacterized protein OS=Homo sapiens GN=FN1 PE=4 SV=1	9737	265981	524	399	146	131	544	1	0	0	404.25	806.49	2	806.49	0	0	27.12	0.0048	R	ITGYIIK	Y			F80CXA20_2.4448.4448.2
2	E7ERA1	Uncharacterized protein OS=Homo sapiens GN=FN1 PE=4 SV=1	9737	265981	524	399	146	131	549	1	0	0	404.72	807.42	2	807.42	0	0	28.59	0.025	R	AQITGYR	L			F80CXA20_1.2689.2689.2
2	E7ERA1	Uncharacterized protein OS=Homo sapiens GN=FN1 PE=4 SV=1	9737	265981	524	399	146	131	550	1	0	0	404.72	807.42	2	807.42	0	0	28.69	0.025	R	AQITGYR	L			2_F80CXA20_2.2693.2693.2
2	E7ERA1	Uncharacterized protein OS=Homo sapiens GN=FN1 PE=4 SV=1	9737	265981	524	399	146	131	690	1	0	0	414.75	827.49	2	827.49	0	0	29.27	0.013	R	TIKPDVR	S			f69cxb20.1987.1987.2
2	E7ERA1	Uncharacterized protein OS=Homo sapiens GN=FN1 PE=4 SV=1	9737	265981	524	399	146	131	691	1	0	0	414.75	827.49	2	827.49	0	0	26.65	0.025	R	TIKPDVR	S			f69txb20.1843.1843.2
2	E7ERA1	Uncharacterized protein OS=Homo sapiens GN=FN1 PE=4 SV=1	9737	265981	524	399	146	131	918	1	0	0	429.72	857.42	2	857.42	0	0	35.35	0.0038	R	SDTVPSPR	D			f69txa20.2138.2138.2
2	E7ERA1	Uncharacterized protein OS=Homo sapiens GN=FN1 PE=4 SV=1	9737	265981	524	399	146	131	919	1	0	0	429.72	857.42	2	857.42	0	0	38.18	0.002	R	SDTVPSPR	D			f69cxb20.2153.2153.2
2	E7ERA1	Uncharacterized protein OS=Homo sapiens GN=FN1 PE=4 SV=1	9737	265981	524	399	146	131	1024	1	0	0	436.74	871.47	2	871.47	0	0	41.73	0.00087	K	VFAVSHGR	E			2_F80CXA20_1.2519.2519.2
2	E7ERA1	Uncharacterized protein OS=Homo sapiens GN=FN1 PE=4 SV=1	9737	265981	524	399	146	131	1025	1	0	0	436.74	871.47	2	871.47	0	0	51.74	8.7e-05	K	VFAVSHGR	E			F80CXA20_1.2520.2520.2
2	E7ERA1	Uncharacterized protein OS=Homo sapiens GN=FN1 PE=4 SV=1	9737	265981	524	399	146	131	1042	1	0	0	437.71	873.4	2	873.4	0	0	10.28	0.62	K	YTGNTYR	V			f69cxa20.1538.1538.2
2	E7ERA1	Uncharacterized protein OS=Homo sapiens GN=FN1 PE=4 SV=1	9737	265981	524	399	146	131	1043	1	0	0	437.71	873.4	2	873.4	0	0	7.09	1.3	K	YTGNTYR	V			2_F80TXB20.1812.1812.2
2	E7ERA1	Uncharacterized protein OS=Homo sapiens GN=FN1 PE=4 SV=1	9737	265981	524	399	146	131	1200	1	0	0	450.27	898.52	2	898.52	0	1	23.8	0.045	K	SEPLIGRK	K			2_F80TXA20.2694.2694.2
2	E7ERA1	Uncharacterized protein OS=Homo sapiens GN=FN1 PE=4 SV=1	9737	265981	524	399	146	131	1201	1	0	0	450.27	898.52	2	898.52	0	1	19.77	0.11	K	SEPLIGRK	K			m84cxa20.2538.2538.2
2	E7ERA1	Uncharacterized protein OS=Homo sapiens GN=FN1 PE=4 SV=1	9737	265981	524	399	146	131	1234	1	0	0	452.24	902.46	2	902.46	0	1	42.39	0.00084	K	IGEKWDR	Q			f69cxb20_100930171645.2450.2450.2
2	E7ERA1	Uncharacterized protein OS=Homo sapiens GN=FN1 PE=4 SV=1	9737	265981	524	399	146	131	1235	1	0	0	452.24	902.46	2	902.46	0	1	35.05	0.0045	K	IGEKWDR	Q			m84cxb20.2302.2302.2
2	E7ERA1	Uncharacterized protein OS=Homo sapiens GN=FN1 PE=4 SV=1	9737	265981	524	399	146	131	1307	3	0	0	458.29	914.57	2	914.57	0	1	8.01	0.55	R	LTVGLTRR	G			2_F80TXB20.3360.3360.2
2	E7ERA1	Uncharacterized protein OS=Homo sapiens GN=FN1 PE=4 SV=1	9737	265981	524	399	146	131	1308	2	0	0	458.29	914.57	2	914.57	0	1	8.53	0.48	R	LTVGLTRR	G			F80CXA20_2.3417.3417.2
2	E7ERA1	Uncharacterized protein OS=Homo sapiens GN=FN1 PE=4 SV=1	9737	265981	524	399	146	131	1309	3	0	0	458.29	914.57	2	914.57	0	1	6.85	0.48	R	LTVGLTRR	G			2_F80TXA20.3672.3672.2
2	E7ERA1	Uncharacterized protein OS=Homo sapiens GN=FN1 PE=4 SV=1	9737	265981	524	399	146	131	1363	1	0	0	462.2	922.38	2	922.37	0	0	18.87	0.037	R	CTCVGNGR	G			m84cxa20.1442.1442.2
2	E7ERA1	Uncharacterized protein OS=Homo sapiens GN=FN1 PE=4 SV=1	9737	265981	524	399	146	131	1449	1	0	0	467.74	933.47	2	933.47	0	0	58.6	3.3e-05	R	ISCTIANR	C			2_F80CXA20_2.2673.2673.2
2	E7ERA1	Uncharacterized protein OS=Homo sapiens GN=FN1 PE=4 SV=1	9737	265981	524	399	146	131	1450	1	0	0	467.74	933.47	2	933.47	0	0	50.5	0.00021	R	ISCTIANR	C			m84cxa20.2532.2532.2
2	E7ERA1	Uncharacterized protein OS=Homo sapiens GN=FN1 PE=4 SV=1	9737	265981	524	399	146	131	1953	1	0	0	498.25	994.49	2	994.49	0	1	21.98	0.087	R	EDRVPHSR	N			f69cxb20_100930171645.1337.1337.2
2	E7ERA1	Uncharacterized protein OS=Homo sapiens GN=FN1 PE=4 SV=1	9737	265981	524	399	146	131	1954	1	0	0	498.25	994.49	2	994.49	0	1	17.61	0.24	R	EDRVPHSR	N			m84cxa20.1353.1353.2
2	E7ERA1	Uncharacterized protein OS=Homo sapiens GN=FN1 PE=4 SV=1	9737	265981	524	399	146	131	2251	1	0	0	515.77	1029.53	2	1029.52	0	0	28.21	0.036	K	YEKPGSPPR	E			F80TXA20.1766.1766.2
2	E7ERA1	Uncharacterized protein OS=Homo sapiens GN=FN1 PE=4 SV=1	9737	265981	524	399	146	131	2252	1	0	0	515.77	1029.53	2	1029.52	0	0	31.58	0.016	K	YEKPGSPPR	E			m84cxb20.1539.1539.2
2	E7ERA1	Uncharacterized protein OS=Homo sapiens GN=FN1 PE=4 SV=1	9737	265981	524	399	146	131	2537	1	0	0	532.77	1063.53	2	1063.53	0	0	38.71	0.0023	R	VGDTYERPK	D			f69cxb20_100930171645.1826.1826.2
2	E7ERA1	Uncharacterized protein OS=Homo sapiens GN=FN1 PE=4 SV=1	9737	265981	524	399	146	131	2538	1	0	0	532.77	1063.53	2	1063.53	0	0	44.48	0.00061	R	VGDTYERPK	D			2_F80CXA20_1.1936.1936.2
2	E7ERA1	Uncharacterized protein OS=Homo sapiens GN=FN1 PE=4 SV=1	9737	265981	524	399	146	131	2543	1	0	0	533.22	1064.43	2	1064.43	0	0	42	0.00019	R	CHEGGQSYK	I			f69cxb20_100930171645.1260.1260.2
2	E7ERA1	Uncharacterized protein OS=Homo sapiens GN=FN1 PE=4 SV=1	9737	265981	524	399	146	131	2544	1	0	0	533.22	1064.43	2	1064.43	0	0	26.09	0.0074	R	CHEGGQSYK	I			F80TXA20.1113.1113.2
2	E7ERA1	Uncharacterized protein OS=Homo sapiens GN=FN1 PE=4 SV=1	9737	265981	524	399	146	131	2601	1	0	0	536.29	1070.57	2	1070.56	0	0	30.48	0.014	K	YEVSVYALK	D			f69txb20.4653.4653.2
2	E7ERA1	Uncharacterized protein OS=Homo sapiens GN=FN1 PE=4 SV=1	9737	265981	524	399	146	131	2602	1	0	0	536.29	1070.57	2	1070.56	0	0	34.25	0.0058	K	YEVSVYALK	D			m84txb20.4695.4695.2
2	E7ERA1	Uncharacterized protein OS=Homo sapiens GN=FN1 PE=4 SV=1	9737	265981	524	399	146	131	2672	1	0	0	539.78	1077.54	2	1077.55	0	0	38.66	0.0032	R	QYNVGPSVSK	Y			2_F80CXA20_1.3008.3008.2
2	E7ERA1	Uncharacterized protein OS=Homo sapiens GN=FN1 PE=4 SV=1	9737	265981	524	399	146	131	2673	1	0	0	539.78	1077.54	2	1077.55	0	0	28.52	0.033	R	QYNVGPSVSK	Y			F80CXA20_1.3011.3011.2
2	E7ERA1	Uncharacterized protein OS=Homo sapiens GN=FN1 PE=4 SV=1	9737	265981	524	399	146	131	2958	1	0	0	555.77	1109.54	2	1109.54	0	0	32.61	0.006	R	STTPDITGYR	I			f69cxb20_100930171645.3447.3447.2
2	E7ERA1	Uncharacterized protein OS=Homo sapiens GN=FN1 PE=4 SV=1	9737	265981	524	399	146	131	2959	1	0	0	555.77	1109.54	2	1109.54	0	0	39.45	0.0012	R	STTPDITGYR	I			m84txa20.3405.3405.2
2	E7ERA1	Uncharacterized protein OS=Homo sapiens GN=FN1 PE=4 SV=1	9737	265981	524	399	146	131	3076	1	0	0	562.23	1122.45	2	1122.44	0	1	14.34	0.048	R	GWRCDNCR	R			2_F80CXA20_1.2003.2003.2
2	E7ERA1	Uncharacterized protein OS=Homo sapiens GN=FN1 PE=4 SV=1	9737	265981	524	399	146	131	3077	1	0	0	562.23	1122.45	2	1122.44	0	1	18.07	0.02	R	GWRCDNCR	R			F80CXA20_1.1963.1963.2
2	E7ERA1	Uncharacterized protein OS=Homo sapiens GN=FN1 PE=4 SV=1	9737	265981	524	399	146	131	3255	1	0	0	571.74	1141.46	2	1141.46	0	0	18.61	0.026	K	QHDMGHMMR	C			2_F80TXA20.2307.2307.2
2	E7ERA1	Uncharacterized protein OS=Homo sapiens GN=FN1 PE=4 SV=1	9737	265981	524	399	146	131	3256	1	0	0	571.74	1141.46	2	1141.46	0	0	19.16	0.023	K	QHDMGHMMR	C			f69cxb20.2074.2074.2
2	E7ERA1	Uncharacterized protein OS=Homo sapiens GN=FN1 PE=4 SV=1	9737	265981	524	399	146	131	3302	1	0	0	574.3	1146.59	2	1146.59	0	1	36.19	0.0053	R	GRISCTIANR	C			2_F80TXA20.2622.2622.2
2	E7ERA1	Uncharacterized protein OS=Homo sapiens GN=FN1 PE=4 SV=1	9737	265981	524	399	146	131	3303	1	0	0	574.3	1146.59	2	1146.59	0	1	28.66	0.03	R	GRISCTIANR	C			f69cxb20.2317.2317.2
2	E7ERA1	Uncharacterized protein OS=Homo sapiens GN=FN1 PE=4 SV=1	9737	265981	524	399	146	131	3489	1	0	0	585.23	1168.44	2	1168.44	0	0	36.91	0.00031	R	YQCYCYGR	G			f69cxa20.2498.2498.2
2	E7ERA1	Uncharacterized protein OS=Homo sapiens GN=FN1 PE=4 SV=1	9737	265981	524	399	146	131	3490	1	0	0	585.23	1168.44	2	1168.44	0	0	34.4	0.00054	R	YQCYCYGR	G			2_F80TXA20.3033.3033.2
2	E7ERA1	Uncharacterized protein OS=Homo sapiens GN=FN1 PE=4 SV=1	9737	265981	524	399	146	131	4072	1	0	0	611.26	1220.51	2	1220.51	0	0	63.42	1.5e-06	R	TFYSCTTEGR	Q			F80TXB20.3251.3251.2
2	E7ERA1	Uncharacterized protein OS=Homo sapiens GN=FN1 PE=4 SV=1	9737	265981	524	399	146	131	4073	1	0	0	611.26	1220.51	2	1220.51	0	0	47.6	5.8e-05	R	TFYSCTTEGR	Q			F80CXA20_2.3252.3252.2
2	E7ERA1	Uncharacterized protein OS=Homo sapiens GN=FN1 PE=4 SV=1	9737	265981	524	399	146	131	4466	1	0	0	419.23	1254.67	3	1254.67	0	1	33.8	0.0054	K	NNQKSEPLIGR	K			F80CXA20_2.2881.2881.3
2	E7ERA1	Uncharacterized protein OS=Homo sapiens GN=FN1 PE=4 SV=1	9737	265981	524	399	146	131	4467	1	0	0	419.23	1254.67	3	1254.67	0	1	27.81	0.022	K	NNQKSEPLIGR	K			2_F80TXA20.2955.2955.3
2	E7ERA1	Uncharacterized protein OS=Homo sapiens GN=FN1 PE=4 SV=1	9737	265981	524	399	146	131	4468	1	0	0	628.34	1254.67	2	1254.67	0	1	43.2	0.00065	K	NNQKSEPLIGR	K			f69cxb20.2597.2597.2
2	E7ERA1	Uncharacterized protein OS=Homo sapiens GN=FN1 PE=4 SV=1	9737	265981	524	399	146	131	4469	1	0	0	628.34	1254.67	2	1254.67	0	1	29.71	0.015	K	NNQKSEPLIGR	K			m84txb20.2483.2483.2
2	E7ERA1	Uncharacterized protein OS=Homo sapiens GN=FN1 PE=4 SV=1	9737	265981	524	399	146	131	4664	1	0	0	638.31	1274.6	2	1274.6	0	0	29.46	0.011	K	TYHVGEQWQK	E			2_F80TXA20.3418.3418.2
2	E7ERA1	Uncharacterized protein OS=Homo sapiens GN=FN1 PE=4 SV=1	9737	265981	524	399	146	131	4665	1	0	0	638.31	1274.6	2	1274.6	0	0	28.55	0.014	K	TYHVGEQWQK	E			m84txa20.2960.2960.2
2	E7ERA1	Uncharacterized protein OS=Homo sapiens GN=FN1 PE=4 SV=1	9737	265981	524	399	146	131	4666	1	0	0	425.88	1274.6	3	1274.6	0	0	36.19	0.0024	K	TYHVGEQWQK	E			F80CXA20_2.3352.3352.3
2	E7ERA1	Uncharacterized protein OS=Homo sapiens GN=FN1 PE=4 SV=1	9737	265981	524	399	146	131	4667	1	0	0	425.88	1274.6	3	1274.6	0	0	33.37	0.0046	K	TYHVGEQWQK	E			2_F80TXB20.3285.3285.3
2	E7ERA1	Uncharacterized protein OS=Homo sapiens GN=FN1 PE=4 SV=1	9737	265981	524	399	146	131	4889	1	0	0	431.52	1291.54	3	1291.54	0	0	25.48	0.013	R	WCHDNGVNYK	I			F80TXB20.2679.2679.3
2	E7ERA1	Uncharacterized protein OS=Homo sapiens GN=FN1 PE=4 SV=1	9737	265981	524	399	146	131	4890	1	0	0	431.52	1291.54	3	1291.54	0	0	27.26	0.0088	R	WCHDNGVNYK	I			2_F80CXA20_2.2719.2719.3
2	E7ERA1	Uncharacterized protein OS=Homo sapiens GN=FN1 PE=4 SV=1	9737	265981	524	399	146	131	4891	1	0	0	646.78	1291.54	2	1291.54	0	0	48.35	7.5e-05	R	WCHDNGVNYK	I			2_F80TXA20.2750.2750.2
2	E7ERA1	Uncharacterized protein OS=Homo sapiens GN=FN1 PE=4 SV=1	9737	265981	524	399	146	131	4892	1	0	0	646.78	1291.54	2	1291.54	0	0	50.18	4.9e-05	R	WCHDNGVNYK	I			f69cxa20.2254.2254.2
2	E7ERA1	Uncharacterized protein OS=Homo sapiens GN=FN1 PE=4 SV=1	9737	265981	524	399	146	131	4898	1	0	0	646.84	1291.67	2	1291.67	0	0	66.54	4.5e-06	R	DLQFVEVTDVK	V			f69cxb20_100930171645.5600.5600.2
2	E7ERA1	Uncharacterized protein OS=Homo sapiens GN=FN1 PE=4 SV=1	9737	265981	524	399	146	131	4899	1	0	0	646.84	1291.67	2	1291.67	0	0	68.02	3.2e-06	R	DLQFVEVTDVK	V			m84txa20.5545.5545.2
2	E7ERA1	Uncharacterized protein OS=Homo sapiens GN=FN1 PE=4 SV=1	9737	265981	524	399	146	131	5119	1	0	0	656.37	1310.73	2	1310.73	0	1	8.23	1.3	R	RTTPPTTATPIR	H			2_F80TXA20.2887.2887.2
2	E7ERA1	Uncharacterized protein OS=Homo sapiens GN=FN1 PE=4 SV=1	9737	265981	524	399	146	131	5217	1	0	0	440.22	1317.64	3	1317.64	0	0	31.8	0.011	K	GEWTCKPIAEK	C			2_F80CXA20_1.3320.3320.3
2	E7ERA1	Uncharacterized protein OS=Homo sapiens GN=FN1 PE=4 SV=1	9737	265981	524	399	146	131	5218	1	0	0	440.22	1317.64	3	1317.64	0	0	32.89	0.0084	K	GEWTCKPIAEK	C			f69cxa20_100930142853.2830.2830.3
2	E7ERA1	Uncharacterized protein OS=Homo sapiens GN=FN1 PE=4 SV=1	9737	265981	524	399	146	131	5219	1	0	0	659.83	1317.64	2	1317.64	0	0	46.46	0.00038	K	GEWTCKPIAEK	C			2_F80CXA20_2.3328.3328.2
2	E7ERA1	Uncharacterized protein OS=Homo sapiens GN=FN1 PE=4 SV=1	9737	265981	524	399	146	131	5220	1	0	0	659.83	1317.64	2	1317.64	0	0	38.06	0.0026	K	GEWTCKPIAEK	C			2_F80TXA20.3364.3364.2
2	E7ERA1	Uncharacterized protein OS=Homo sapiens GN=FN1 PE=4 SV=1	9737	265981	524	399	146	131	5281	1	0	0	441.91	1322.71	3	1322.71	0	0	49.24	0.00015	K	LGVRPSQGGEAPR	E			m84txa20.2199.2199.3
2	E7ERA1	Uncharacterized protein OS=Homo sapiens GN=FN1 PE=4 SV=1	9737	265981	524	399	146	131	5282	1	0	0	441.91	1322.71	3	1322.71	0	0	41.9	0.00084	K	LGVRPSQGGEAPR	E			2_F80CXA20_1.2479.2479.3
2	E7ERA1	Uncharacterized protein OS=Homo sapiens GN=FN1 PE=4 SV=1	9737	265981	524	399	146	131	5283	1	0	0	662.36	1322.71	2	1322.71	0	0	31.08	0.01	K	LGVRPSQGGEAPR	E			f69txa20.2201.2201.2
2	E7ERA1	Uncharacterized protein OS=Homo sapiens GN=FN1 PE=4 SV=1	9737	265981	524	399	146	131	5284	1	0	0	662.36	1322.71	2	1322.71	0	0	49.45	0.00015	K	LGVRPSQGGEAPR	E			m84cxb20.2039.2039.2
2	E7ERA1	Uncharacterized protein OS=Homo sapiens GN=FN1 PE=4 SV=1	9737	265981	524	399	146	131	5381	1	0	0	444.58	1330.71	3	1330.71	0	0	17.9	0.28	R	ESKPLTAQQTTK	L			F80CXA20_1.1797.1797.3
2	E7ERA1	Uncharacterized protein OS=Homo sapiens GN=FN1 PE=4 SV=1	9737	265981	524	399	146	131	5382	1	0	0	444.58	1330.71	3	1330.71	0	0	30.4	0.016	R	ESKPLTAQQTTK	L			2_F80TXA20.1837.1837.3
2	E7ERA1	Uncharacterized protein OS=Homo sapiens GN=FN1 PE=4 SV=1	9737	265981	524	399	146	131	5383	1	0	0	666.36	1330.71	2	1330.71	0	0	29.08	0.021	R	ESKPLTAQQTTK	L			2_F80TXA20.1836.1836.2
2	E7ERA1	Uncharacterized protein OS=Homo sapiens GN=FN1 PE=4 SV=1	9737	265981	524	399	146	131	5384	1	0	0	666.36	1330.71	2	1330.71	0	0	48.16	0.00026	R	ESKPLTAQQTTK	L			f69cxb20_100930171645.1672.1672.2
2	E7ERA1	Uncharacterized protein OS=Homo sapiens GN=FN1 PE=4 SV=1	9737	265981	524	399	146	131	5491	1	0	0	447.9	1340.67	3	1340.67	0	1	38.68	0.0022	R	DGQERDAPIVNK	V			f69cxb20_100930171645.2146.2146.3
2	E7ERA1	Uncharacterized protein OS=Homo sapiens GN=FN1 PE=4 SV=1	9737	265981	524	399	146	131	5492	1	0	0	447.9	1340.67	3	1340.67	0	1	33.51	0.0074	R	DGQERDAPIVNK	V			f69txa20.2160.2160.3
2	E7ERA1	Uncharacterized protein OS=Homo sapiens GN=FN1 PE=4 SV=1	9737	265981	524	399	146	131	5493	1	0	0	671.34	1340.67	2	1340.67	0	1	25.86	0.043	R	DGQERDAPIVNK	V			f69cxb20.2193.2193.2
2	E7ERA1	Uncharacterized protein OS=Homo sapiens GN=FN1 PE=4 SV=1	9737	265981	524	399	146	131	5494	1	0	0	671.34	1340.67	2	1340.67	0	1	18.99	0.21	R	DGQERDAPIVNK	V			f69cxa20.1995.1995.2
2	E7ERA1	Uncharacterized protein OS=Homo sapiens GN=FN1 PE=4 SV=1	9737	265981	524	399	146	131	5495	4	0	0	671.34	1340.67	2	1340.67	0.01	1	5.76	4.9	R	DGQERDAPIVNK	V			2_F80TXB20.6614.6614.2
2	E7ERA1	Uncharacterized protein OS=Homo sapiens GN=FN1 PE=4 SV=1	9737	265981	524	399	146	131	5496	2	0	0	671.34	1340.67	2	1340.67	0.01	1	4.14	7.1	R	DGQERDAPIVNK	V			2_F80CXA20_2.6689.6689.2
2	E7ERA1	Uncharacterized protein OS=Homo sapiens GN=FN1 PE=4 SV=1	9737	265981	524	399	146	131	5619	1	0	0	675.35	1348.68	2	1348.68	0	0	32.29	0.012	K	WLPSSSPVTGYR	V			f69cxb20.4838.4838.2
2	E7ERA1	Uncharacterized protein OS=Homo sapiens GN=FN1 PE=4 SV=1	9737	265981	524	399	146	131	5620	1	0	0	675.35	1348.68	2	1348.68	0	0	40.43	0.0018	K	WLPSSSPVTGYR	V			f69cxa20_100930142853.4793.4793.2
2	E7ERA1	Uncharacterized protein OS=Homo sapiens GN=FN1 PE=4 SV=1	9737	265981	524	399	146	131	5701	1	0	0	678.35	1354.69	2	1354.69	0	0	30.56	0.012	K	IYLYTLNDNAR	S			F80TXB20.8830.8830.2
2	E7ERA1	Uncharacterized protein OS=Homo sapiens GN=FN1 PE=4 SV=1	9737	265981	524	399	146	131	5702	1	0	0	678.35	1354.69	2	1354.69	0	0	34.09	0.0054	K	IYLYTLNDNAR	S			f69cxa20_100930142853.8059.8059.2
2	E7ERA1	Uncharacterized protein OS=Homo sapiens GN=FN1 PE=4 SV=1	9737	265981	524	399	146	131	5703	1	0	0	678.35	1354.69	2	1354.69	0	0	46.14	0.00037	K	IYLYTLNDNAR	S			f69txb20.4977.4977.2
2	E7ERA1	Uncharacterized protein OS=Homo sapiens GN=FN1 PE=4 SV=1	9737	265981	524	399	146	131	5704	1	0	0	678.35	1354.69	2	1354.69	0	0	58.8	2e-05	K	IYLYTLNDNAR	S			m84txb20.5009.5009.2
2	E7ERA1	Uncharacterized protein OS=Homo sapiens GN=FN1 PE=4 SV=1	9737	265981	524	399	146	131	5716	1	0	0	678.84	1355.66	2	1355.66	0	0	20.74	0.098	R	HHPEHFSGRPR	E			2_F80TXB20.1486.1486.2
2	E7ERA1	Uncharacterized protein OS=Homo sapiens GN=FN1 PE=4 SV=1	9737	265981	524	399	146	131	5717	1	0	0	678.84	1355.66	2	1355.66	0	0	12.88	0.6	R	HHPEHFSGRPR	E			F80TXB20.1505.1505.2
2	E7ERA1	Uncharacterized protein OS=Homo sapiens GN=FN1 PE=4 SV=1	9737	265981	524	399	146	131	5718	1	0	0	452.89	1355.66	3	1355.66	0	0	15.03	0.39	R	HHPEHFSGRPR	E			F80TXB20.1490.1490.3
2	E7ERA1	Uncharacterized protein OS=Homo sapiens GN=FN1 PE=4 SV=1	9737	265981	524	399	146	131	5719	1	0	0	452.89	1355.66	3	1355.66	0	0	5.29	3.6	R	HHPEHFSGRPR	E			F80TXA20.1392.1392.3
2	E7ERA1	Uncharacterized protein OS=Homo sapiens GN=FN1 PE=4 SV=1	9737	265981	524	399	146	131	5734	1	0	0	679.35	1356.68	2	1356.68	0	0	4.49	5.8	K	IAWESPQGQVSR	Y			m84txb20.3858.3858.2
2	E7ERA1	Uncharacterized protein OS=Homo sapiens GN=FN1 PE=4 SV=1	9737	265981	524	399	146	131	6002	1	0	0	690.36	1378.7	2	1378.7	0	0	63.4	8.6e-06	K	GLAFTDVDVDSIK	I			F80CXA20_1.6472.6472.2
2	E7ERA1	Uncharacterized protein OS=Homo sapiens GN=FN1 PE=4 SV=1	9737	265981	524	399	146	131	6003	1	0	0	690.36	1378.7	2	1378.7	0	0	64.2	7.2e-06	K	GLAFTDVDVDSIK	I			f69cxa20_100930142853.5835.5835.2
2	E7ERA1	Uncharacterized protein OS=Homo sapiens GN=FN1 PE=4 SV=1	9737	265981	524	399	146	131	6271	1	0	0	467.89	1400.66	3	1400.66	0	0	40.99	0.00088	K	HYQINQQWER	T			m84txb20.3210.3210.3
2	E7ERA1	Uncharacterized protein OS=Homo sapiens GN=FN1 PE=4 SV=1	9737	265981	524	399	146	131	6272	1	0	0	467.89	1400.66	3	1400.66	0	0	44.81	0.00036	K	HYQINQQWER	T			2_F80TXB20.3658.3658.3
2	E7ERA1	Uncharacterized protein OS=Homo sapiens GN=FN1 PE=4 SV=1	9737	265981	524	399	146	131	6273	1	0	0	701.34	1400.66	2	1400.66	0	0	35.34	0.0032	K	HYQINQQWER	T			m84txb20.3207.3207.2
2	E7ERA1	Uncharacterized protein OS=Homo sapiens GN=FN1 PE=4 SV=1	9737	265981	524	399	146	131	6274	1	0	0	701.34	1400.66	2	1400.66	0	0	36.09	0.0027	K	HYQINQQWER	T			f69cxb20_100930171645.3292.3292.2
2	E7ERA1	Uncharacterized protein OS=Homo sapiens GN=FN1 PE=4 SV=1	9737	265981	524	399	146	131	6389	1	0	0	472.54	1414.59	3	1414.59	0	1	1.48	3.6	R	CNDQDTRTSYR	I			F80TXA20.1568.1568.3
2	E7ERA1	Uncharacterized protein OS=Homo sapiens GN=FN1 PE=4 SV=1	9737	265981	524	399	146	131	6390	1	0	0	472.54	1414.59	3	1414.59	0	1	25.41	0.014	R	CNDQDTRTSYR	I			2_F80CXA20_2.1700.1700.3
2	E7ERA1	Uncharacterized protein OS=Homo sapiens GN=FN1 PE=4 SV=1	9737	265981	524	399	146	131	6391	1	0	0	708.3	1414.59	2	1414.59	0	1	23	0.027	R	CNDQDTRTSYR	I			F80CXA20_2.1647.1647.2
2	E7ERA1	Uncharacterized protein OS=Homo sapiens GN=FN1 PE=4 SV=1	9737	265981	524	399	146	131	6392	1	0	0	708.3	1414.59	2	1414.59	0	1	21.19	0.041	R	CNDQDTRTSYR	I			F80CXA20_1.1656.1656.2
2	E7ERA1	Uncharacterized protein OS=Homo sapiens GN=FN1 PE=4 SV=1	9737	265981	524	399	146	131	6571	1	0	0	477.92	1430.74	3	1430.74	0	0	38.66	0.0026	R	WSRPQAPITGYR	I			m84cxa20.3980.3980.3
2	E7ERA1	Uncharacterized protein OS=Homo sapiens GN=FN1 PE=4 SV=1	9737	265981	524	399	146	131	6572	1	0	0	477.92	1430.74	3	1430.74	0	0	21.14	0.15	R	WSRPQAPITGYR	I			m84txb20.3600.3600.3
2	E7ERA1	Uncharacterized protein OS=Homo sapiens GN=FN1 PE=4 SV=1	9737	265981	524	399	146	131	6574	1	0	0	716.38	1430.74	2	1430.74	0	0	24.06	0.076	R	WSRPQAPITGYR	I			F80TXA20.4158.4158.2
2	E7ERA1	Uncharacterized protein OS=Homo sapiens GN=FN1 PE=4 SV=1	9737	265981	524	399	146	131	6877	1	0	0	731.4	1460.78	2	1460.78	0	0	67.7	1.8e-06	R	VPGTSTSATLTGLTR	G			f69cxb20.4382.4382.2
2	E7ERA1	Uncharacterized protein OS=Homo sapiens GN=FN1 PE=4 SV=1	9737	265981	524	399	146	131	6878	1	0	0	731.4	1460.78	2	1460.78	0	0	79.78	1.1e-07	R	VPGTSTSATLTGLTR	G			f69txb20.4125.4125.2
2	E7ERA1	Uncharacterized protein OS=Homo sapiens GN=FN1 PE=4 SV=1	9737	265981	524	399	146	131	6881	1	0	0	731.85	1461.68	2	1461.68	0	0	50.77	9.7e-05	R	GNLLQCICTGNGR	G			2_F80CXA20_1.5532.5532.2
2	E7ERA1	Uncharacterized protein OS=Homo sapiens GN=FN1 PE=4 SV=1	9737	265981	524	399	146	131	6882	1	0	0	731.85	1461.68	2	1461.68	0	0	49.47	0.00013	R	GNLLQCICTGNGR	G			f69cxa20.4900.4900.2
2	E7ERA1	Uncharacterized protein OS=Homo sapiens GN=FN1 PE=4 SV=1	9737	265981	524	399	146	131	6883	1	0	0	488.24	1461.69	3	1461.68	0.01	0	32.34	0.0083	R	GNLLQCICTGNGR	G			F80TXB20.5526.5526.3
2	E7ERA1	Uncharacterized protein OS=Homo sapiens GN=FN1 PE=4 SV=1	9737	265981	524	399	146	131	6884	1	0	0	488.24	1461.69	3	1461.68	0.01	0	27.42	0.026	R	GNLLQCICTGNGR	G			F80CXA20_2.5522.5522.3
2	E7ERA1	Uncharacterized protein OS=Homo sapiens GN=FN1 PE=4 SV=1	9737	265981	524	399	146	131	7084	1	0	0	495.24	1482.69	3	1482.69	0	0	41.69	0.00077	R	GEWTCIAYSQLR	D			2_F80CXA20_2.6012.6012.3
2	E7ERA1	Uncharacterized protein OS=Homo sapiens GN=FN1 PE=4 SV=1	9737	265981	524	399	146	131	7085	1	0	0	495.24	1482.69	3	1482.69	0	0	35.3	0.0033	R	GEWTCIAYSQLR	D			m84cxa20.5760.5760.3
2	E7ERA1	Uncharacterized protein OS=Homo sapiens GN=FN1 PE=4 SV=1	9737	265981	524	399	146	131	7086	1	0	0	742.35	1482.69	2	1482.69	0	0	64.46	4.1e-06	R	GEWTCIAYSQLR	D			F80CXA20_2.5971.5971.2
2	E7ERA1	Uncharacterized protein OS=Homo sapiens GN=FN1 PE=4 SV=1	9737	265981	524	399	146	131	7087	1	0	0	742.35	1482.69	2	1482.69	0	0	68.7	1.5e-06	R	GEWTCIAYSQLR	D			2_F80CXA20_1.6000.6000.2
2	E7ERA1	Uncharacterized protein OS=Homo sapiens GN=FN1 PE=4 SV=1	9737	265981	524	399	146	131	7797	1	0	0	515.26	1542.75	3	1542.76	-0.01	0	10.81	1	R	SYTITGLQPGTDYK	I			2_F80CXA20_2.5146.5146.3
2	E7ERA1	Uncharacterized protein OS=Homo sapiens GN=FN1 PE=4 SV=1	9737	265981	524	399	146	131	7798	1	0	0	515.26	1542.75	3	1542.76	-0.01	0	13.59	0.55	R	SYTITGLQPGTDYK	I			F80CXA20_2.5115.5115.3
2	E7ERA1	Uncharacterized protein OS=Homo sapiens GN=FN1 PE=4 SV=1	9737	265981	524	399	146	131	7799	1	0	0	772.39	1542.76	2	1542.76	0	0	72.43	7.2e-07	R	SYTITGLQPGTDYK	I			m84cxa20.4870.4870.2
2	E7ERA1	Uncharacterized protein OS=Homo sapiens GN=FN1 PE=4 SV=1	9737	265981	524	399	146	131	7800	1	0	0	772.39	1542.76	2	1542.76	0	0	77.41	2.3e-07	R	SYTITGLQPGTDYK	I			m84txb20.4442.4442.2
2	E7ERA1	Uncharacterized protein OS=Homo sapiens GN=FN1 PE=4 SV=1	9737	265981	524	399	146	131	7803	2	0	0	515.28	1542.81	3	1542.8	0	0	5.84	3.9	K	EATIPGHLNSYTIK	G			f69cxb20_100930171645.4155.4155.3
2	E7ERA1	Uncharacterized protein OS=Homo sapiens GN=FN1 PE=4 SV=1	9737	265981	524	399	146	131	7804	1	0	0	515.28	1542.81	3	1542.8	0	0	8.58	2.1	K	EATIPGHLNSYTIK	G			f69cxa20.4057.4057.3
2	E7ERA1	Uncharacterized protein OS=Homo sapiens GN=FN1 PE=4 SV=1	9737	265981	524	399	146	131	8045	1	0	0	523.2	1566.57	3	1566.57	0	0	33.3	0.00047	K	CDPHEATCYDDGK	T			m84txb20.1842.1842.3
2	E7ERA1	Uncharacterized protein OS=Homo sapiens GN=FN1 PE=4 SV=1	9737	265981	524	399	146	131	8046	1	0	0	523.2	1566.57	3	1566.57	0	0	35.32	0.00029	K	CDPHEATCYDDGK	T			2_F80CXA20_2.2139.2139.3
2	E7ERA1	Uncharacterized protein OS=Homo sapiens GN=FN1 PE=4 SV=1	9737	265981	524	399	146	131	8047	1	0	0	784.3	1566.58	2	1566.57	0.01	0	37.57	0.00017	K	CDPHEATCYDDGK	T			f69cxb20_100930171645.1897.1897.2
2	E7ERA1	Uncharacterized protein OS=Homo sapiens GN=FN1 PE=4 SV=1	9737	265981	524	399	146	131	8048	1	0	0	784.3	1566.58	2	1566.57	0.01	0	38.07	0.00016	K	CDPHEATCYDDGK	T			f69cxa20_100930142853.1852.1852.2
2	E7ERA1	Uncharacterized protein OS=Homo sapiens GN=FN1 PE=4 SV=1	9737	265981	524	399	146	131	8229	1	0	0	529.56	1585.65	3	1585.65	0	0	21.61	0.0097	K	WCGTTQNYDADQK	F			F80TXB20.3066.3066.3
2	E7ERA1	Uncharacterized protein OS=Homo sapiens GN=FN1 PE=4 SV=1	9737	265981	524	399	146	131	8230	1	0	0	529.56	1585.65	3	1585.65	0	0	8.29	0.21	K	WCGTTQNYDADQK	F			2_F80TXB20.2991.2991.3
2	E7ERA1	Uncharacterized protein OS=Homo sapiens GN=FN1 PE=4 SV=1	9737	265981	524	399	146	131	8232	1	0	0	793.83	1585.65	2	1585.65	0	0	78.36	2e-08	K	WCGTTQNYDADQK	F			F80CXA20_2.3052.3052.2
2	E7ERA1	Uncharacterized protein OS=Homo sapiens GN=FN1 PE=4 SV=1	9737	265981	524	399	146	131	8277	1	0	0	531.27	1590.8	3	1590.8	0	0	39.9	0.0017	R	GDSPASSKPISINYR	T			2_F80CXA20_2.3846.3846.3
2	E7ERA1	Uncharacterized protein OS=Homo sapiens GN=FN1 PE=4 SV=1	9737	265981	524	399	146	131	8278	1	0	0	531.27	1590.8	3	1590.8	0	0	47.31	0.0003	R	GDSPASSKPISINYR	T			2_F80TXA20.3880.3880.3
2	E7ERA1	Uncharacterized protein OS=Homo sapiens GN=FN1 PE=4 SV=1	9737	265981	524	399	146	131	8279	1	0	0	796.41	1590.8	2	1590.8	0	0	50.71	0.00015	R	GDSPASSKPISINYR	T			f69cxb20_100930171645.3396.3396.2
2	E7ERA1	Uncharacterized protein OS=Homo sapiens GN=FN1 PE=4 SV=1	9737	265981	524	399	146	131	8280	1	0	0	796.41	1590.8	2	1590.8	0	0	63.85	7.1e-06	R	GDSPASSKPISINYR	T			F80CXA20_1.3858.3858.2
2	E7ERA1	Uncharacterized protein OS=Homo sapiens GN=FN1 PE=4 SV=1	9737	265981	524	399	146	131	8297	1	0	0	797.41	1592.8	2	1592.8	0	0	97.3	3e-09	R	VTDATETTITISWR	T			2_F80CXA20_2.6168.6168.2
2	E7ERA1	Uncharacterized protein OS=Homo sapiens GN=FN1 PE=4 SV=1	9737	265981	524	399	146	131	8298	1	0	0	797.41	1592.8	2	1592.8	0	0	99.66	1.7e-09	R	VTDATETTITISWR	T			2_F80TXB20.6082.6082.2
2	E7ERA1	Uncharacterized protein OS=Homo sapiens GN=FN1 PE=4 SV=1	9737	265981	524	399	146	131	8410	1	0	0	536.62	1606.85	3	1606.85	0	1	24.37	0.041	R	QYNVGPSVSKYPLR	N			m84txb20.3730.3730.3
2	E7ERA1	Uncharacterized protein OS=Homo sapiens GN=FN1 PE=4 SV=1	9737	265981	524	399	146	131	8411	1	0	0	536.62	1606.85	3	1606.85	0	1	31.33	0.0082	R	QYNVGPSVSKYPLR	N			m84txa20.3773.3773.3
2	E7ERA1	Uncharacterized protein OS=Homo sapiens GN=FN1 PE=4 SV=1	9737	265981	524	399	146	131	8412	1	0	0	804.43	1606.85	2	1606.85	0	1	18.63	0.16	R	QYNVGPSVSKYPLR	N			m84cxa20.4112.4112.2
2	E7ERA1	Uncharacterized protein OS=Homo sapiens GN=FN1 PE=4 SV=1	9737	265981	524	399	146	131	8413	1	0	0	804.43	1606.85	2	1606.85	0	1	34.39	0.0042	R	QYNVGPSVSKYPLR	N			f69txa20.3924.3924.2
2	E7ERA1	Uncharacterized protein OS=Homo sapiens GN=FN1 PE=4 SV=1	9737	265981	524	399	146	131	8606	1	0	0	542.62	1624.84	3	1624.84	0	1	15.92	0.31	R	IRHHPEHFSGRPR	E			2_F80CXA20_2.1601.1601.3
2	E7ERA1	Uncharacterized protein OS=Homo sapiens GN=FN1 PE=4 SV=1	9737	265981	524	399	146	131	8607	1	0	0	542.62	1624.84	3	1624.84	0	1	34.27	0.0046	R	IRHHPEHFSGRPR	E			F80CXA20_2.1519.1519.3
2	E7ERA1	Uncharacterized protein OS=Homo sapiens GN=FN1 PE=4 SV=1	9737	265981	524	399	146	131	8608	1	0	0	407.22	1624.84	4	1624.84	0	1	15.97	0.31	R	IRHHPEHFSGRPR	E			2_F80CXA20_1.1614.1614.4
2	E7ERA1	Uncharacterized protein OS=Homo sapiens GN=FN1 PE=4 SV=1	9737	265981	524	399	146	131	8609	1	0	0	407.22	1624.84	4	1624.84	0	1	22.64	0.066	R	IRHHPEHFSGRPR	E			2_F80CXA20_2.1639.1639.4
2	E7ERA1	Uncharacterized protein OS=Homo sapiens GN=FN1 PE=4 SV=1	9737	265981	524	399	146	131	8610	1	0	0	813.43	1624.84	2	1624.84	0	1	14.22	0.48	R	IRHHPEHFSGRPR	E			F80CXA20_1.1555.1555.2
2	E7ERA1	Uncharacterized protein OS=Homo sapiens GN=FN1 PE=4 SV=1	9737	265981	524	399	146	131	8611	1	0	0	813.43	1624.84	2	1624.84	0	1	21.09	0.098	R	IRHHPEHFSGRPR	E			2_F80CXA20_2.1613.1613.2
2	E7ERA1	Uncharacterized protein OS=Homo sapiens GN=FN1 PE=4 SV=1	9737	265981	524	399	146	131	8653	1	0	0	543.96	1628.86	3	1628.86	0	0	7.27	2.5	R	VDVIPVNLPGEHGQR	L			f69cxb20_100930171645.7138.7138.3
2	E7ERA1	Uncharacterized protein OS=Homo sapiens GN=FN1 PE=4 SV=1	9737	265981	524	399	146	131	8654	1	0	0	543.96	1628.86	3	1628.86	0	0	4.6	4.7	R	VDVIPVNLPGEHGQR	L			f69txa20.7419.7419.3
2	E7ERA1	Uncharacterized protein OS=Homo sapiens GN=FN1 PE=4 SV=1	9737	265981	524	399	146	131	8655	1	0	0	815.44	1628.86	2	1628.86	0	0	67.47	2.4e-06	R	VDVIPVNLPGEHGQR	L			f69cxa20_100930142853.5003.5003.2
2	E7ERA1	Uncharacterized protein OS=Homo sapiens GN=FN1 PE=4 SV=1	9737	265981	524	399	146	131	8656	1	0	0	815.44	1628.86	2	1628.86	0	0	54.2	5.1e-05	R	VDVIPVNLPGEHGQR	L			2_F80CXA20_2.5584.5584.2
2	E7ERA1	Uncharacterized protein OS=Homo sapiens GN=FN1 PE=4 SV=1	9737	265981	524	399	146	131	8657	1	0	0	543.96	1628.87	3	1628.86	0	0	22.81	0.073	R	VDVIPVNLPGEHGQR	L			F80CXA20_2.5559.5559.3
2	E7ERA1	Uncharacterized protein OS=Homo sapiens GN=FN1 PE=4 SV=1	9737	265981	524	399	146	131	8658	1	0	0	543.96	1628.87	3	1628.86	0	0	32.36	0.0081	R	VDVIPVNLPGEHGQR	L			F80TXA20.5557.5557.3
2	E7ERA1	Uncharacterized protein OS=Homo sapiens GN=FN1 PE=4 SV=1	9737	265981	524	399	146	131	8785	1	0	0	547.9	1640.67	3	1640.67	0	0	16.84	0.071	K	DSMIWDCTCIGAGR	G			m84cxa20.5958.5958.3
2	E7ERA1	Uncharacterized protein OS=Homo sapiens GN=FN1 PE=4 SV=1	9737	265981	524	399	146	131	8786	1	0	0	547.9	1640.67	3	1640.67	0	0	23.54	0.015	K	DSMIWDCTCIGAGR	G			f69cxa20.5580.5580.3
2	E7ERA1	Uncharacterized protein OS=Homo sapiens GN=FN1 PE=4 SV=1	9737	265981	524	399	146	131	8787	1	0	0	821.35	1640.68	2	1640.67	0	0	69.21	4.4e-07	K	DSMIWDCTCIGAGR	G			2_F80CXA20_2.6186.6186.2
2	E7ERA1	Uncharacterized protein OS=Homo sapiens GN=FN1 PE=4 SV=1	9737	265981	524	399	146	131	8788	1	0	0	821.35	1640.68	2	1640.67	0	0	63.43	1.7e-06	K	DSMIWDCTCIGAGR	G			2_F80CXA20_1.6185.6185.2
2	E7ERA1	Uncharacterized protein OS=Homo sapiens GN=FN1 PE=4 SV=1	9737	265981	524	399	146	131	8884	1	0	0	551.27	1650.77	3	1650.78	0	0	53.43	4.6e-05	K	LLCQCLGFGSGHFR	C			F80CXA20_1.5713.5713.3
2	E7ERA1	Uncharacterized protein OS=Homo sapiens GN=FN1 PE=4 SV=1	9737	265981	524	399	146	131	8885	1	0	0	551.27	1650.77	3	1650.78	0	0	58.32	1.5e-05	K	LLCQCLGFGSGHFR	C			F80CXA20_2.5664.5664.3
2	E7ERA1	Uncharacterized protein OS=Homo sapiens GN=FN1 PE=4 SV=1	9737	265981	524	399	146	131	8888	1	0	0	826.4	1650.78	2	1650.78	0	0	85.7	3.4e-08	K	LLCQCLGFGSGHFR	C			F80TXB20.5689.5689.2
2	E7ERA1	Uncharacterized protein OS=Homo sapiens GN=FN1 PE=4 SV=1	9737	265981	524	399	146	131	8889	1	0	0	826.4	1650.78	2	1650.78	0	0	73.83	5.2e-07	K	LLCQCLGFGSGHFR	C			F80CXA20_2.5680.5680.2
2	E7ERA1	Uncharacterized protein OS=Homo sapiens GN=FN1 PE=4 SV=1	9737	265981	524	399	146	131	8978	1	0	0	829.34	1656.67	2	1656.67	0	0	54.71	4.7e-06	K	DSMIWDCTCIGAGR	G	Oxidation (M)	0.00100000000000.0	2_F80CXA20_1.5475.5475.2
2	E7ERA1	Uncharacterized protein OS=Homo sapiens GN=FN1 PE=4 SV=1	9737	265981	524	399	146	131	8979	1	0	0	829.34	1656.67	2	1656.67	0	0	45.77	3.7e-05	K	DSMIWDCTCIGAGR	G	Oxidation (M)	0.00100000000000.0	f69cxa20.4819.4819.2
2	E7ERA1	Uncharacterized protein OS=Homo sapiens GN=FN1 PE=4 SV=1	9737	265981	524	399	146	131	9723	1	0	0	863.92	1725.82	2	1725.81	0	0	81.06	8.8e-08	K	YSFCTDHTVLVQTR	G			F80TXA20.4820.4820.2
2	E7ERA1	Uncharacterized protein OS=Homo sapiens GN=FN1 PE=4 SV=1	9737	265981	524	399	146	131	9724	1	0	0	863.92	1725.82	2	1725.81	0	0	73.77	4.7e-07	K	YSFCTDHTVLVQTR	G			F80CXA20_2.4825.4825.2
2	E7ERA1	Uncharacterized protein OS=Homo sapiens GN=FN1 PE=4 SV=1	9737	265981	524	399	146	131	9725	1	0	0	576.28	1725.82	3	1725.81	0	0	34.24	0.0043	K	YSFCTDHTVLVQTR	G			f69txa20.4433.4433.3
2	E7ERA1	Uncharacterized protein OS=Homo sapiens GN=FN1 PE=4 SV=1	9737	265981	524	399	146	131	9726	1	0	0	576.28	1725.82	3	1725.81	0	0	27.56	0.02	K	YSFCTDHTVLVQTR	G			m84txb20.4312.4312.3
2	E7ERA1	Uncharacterized protein OS=Homo sapiens GN=FN1 PE=4 SV=1	9737	265981	524	399	146	131	9759	1	0	0	578.32	1731.94	3	1731.94	0	0	57.59	1.8e-05	R	NLQPASEYTVSLVAIK	G			F80TXA20.6600.6600.3
2	E7ERA1	Uncharacterized protein OS=Homo sapiens GN=FN1 PE=4 SV=1	9737	265981	524	399	146	131	9760	1	0	0	578.32	1731.94	3	1731.94	0	0	62.31	6.1e-06	R	NLQPASEYTVSLVAIK	G			2_F80TXB20.6530.6530.3
2	E7ERA1	Uncharacterized protein OS=Homo sapiens GN=FN1 PE=4 SV=1	9737	265981	524	399	146	131	9761	1	0	0	866.98	1731.94	2	1731.94	0	0	78.57	1.5e-07	R	NLQPASEYTVSLVAIK	G			m84txb20.5951.5951.2
2	E7ERA1	Uncharacterized protein OS=Homo sapiens GN=FN1 PE=4 SV=1	9737	265981	524	399	146	131	9762	1	0	0	866.98	1731.94	2	1731.94	0	0	80.22	1e-07	R	NLQPASEYTVSLVAIK	G			m84txb20.5844.5844.2
2	E7ERA1	Uncharacterized protein OS=Homo sapiens GN=FN1 PE=4 SV=1	9737	265981	524	399	146	131	10145	1	0	0	590.33	1767.97	3	1767.97	0	1	33.31	0.0035	R	IGFKLGVRPSQGGEAPR	E			2_F80CXA20_1.4386.4386.3
2	E7ERA1	Uncharacterized protein OS=Homo sapiens GN=FN1 PE=4 SV=1	9737	265981	524	399	146	131	10146	1	0	0	590.33	1767.97	3	1767.97	0	1	29.44	0.0086	R	IGFKLGVRPSQGGEAPR	E			F80TXA20.4351.4351.3
2	E7ERA1	Uncharacterized protein OS=Homo sapiens GN=FN1 PE=4 SV=1	9737	265981	524	399	146	131	10147	1	0	0	443	1767.98	4	1767.97	0	1	23.41	0.036	R	IGFKLGVRPSQGGEAPR	E			2_F80TXB20.4331.4331.4
2	E7ERA1	Uncharacterized protein OS=Homo sapiens GN=FN1 PE=4 SV=1	9737	265981	524	399	146	131	10148	1	0	0	443	1767.98	4	1767.97	0	1	24.24	0.03	R	IGFKLGVRPSQGGEAPR	E			2_F80TXA20.4427.4427.4
2	E7ERA1	Uncharacterized protein OS=Homo sapiens GN=FN1 PE=4 SV=1	9737	265981	524	399	146	131	10149	1	0	0	885	1767.98	2	1767.97	0	1	32.28	0.0042	R	IGFKLGVRPSQGGEAPR	E			2_F80CXA20_1.4392.4392.2
2	E7ERA1	Uncharacterized protein OS=Homo sapiens GN=FN1 PE=4 SV=1	9737	265981	524	399	146	131	10150	1	0	0	885	1767.98	2	1767.97	0	1	38.95	0.0009	R	IGFKLGVRPSQGGEAPR	E			F80CXA20_2.4355.4355.2
2	E7ERA1	Uncharacterized protein OS=Homo sapiens GN=FN1 PE=4 SV=1	9737	265981	524	399	146	131	10359	1	0	0	896.41	1790.81	2	1790.81	0	0	73.82	4.5e-07	R	TYLGNALVCTCYGGSR	G			f69cxa20_100930142853.4991.4991.2
2	E7ERA1	Uncharacterized protein OS=Homo sapiens GN=FN1 PE=4 SV=1	9737	265981	524	399	146	131	10360	1	0	0	896.41	1790.81	2	1790.81	0	0	82.94	5.5e-08	R	TYLGNALVCTCYGGSR	G			f69txb20.4834.4834.2
2	E7ERA1	Uncharacterized protein OS=Homo sapiens GN=FN1 PE=4 SV=1	9737	265981	524	399	146	131	10361	1	0	0	597.94	1790.81	3	1790.81	0	0	48.6	0.00015	R	TYLGNALVCTCYGGSR	G			2_F80TXA20.5640.5640.3
2	E7ERA1	Uncharacterized protein OS=Homo sapiens GN=FN1 PE=4 SV=1	9737	265981	524	399	146	131	10362	1	0	0	597.94	1790.81	3	1790.81	0	0	44.1	0.00042	R	TYLGNALVCTCYGGSR	G			m84cxb20.4852.4852.3
2	E7ERA1	Uncharacterized protein OS=Homo sapiens GN=FN1 PE=4 SV=1	9737	265981	524	399	146	131	10367	1	0	0	598.61	1792.8	3	1792.8	0	1	11.96	0.6	R	CHEGGQSYKIGDTWR	R			f69txb20.3206.3206.3
2	E7ERA1	Uncharacterized protein OS=Homo sapiens GN=FN1 PE=4 SV=1	9737	265981	524	399	146	131	10368	1	0	0	598.61	1792.8	3	1792.8	0	1	11.82	0.62	R	CHEGGQSYKIGDTWR	R			m84txa20.3339.3339.3
2	E7ERA1	Uncharacterized protein OS=Homo sapiens GN=FN1 PE=4 SV=1	9737	265981	524	399	146	131	10492	1	0	0	603.31	1806.9	3	1806.9	0	0	53.53	7.2e-05	K	VTIMWTPPESAVTGYR	V			F80TXA20.6858.6858.3
2	E7ERA1	Uncharacterized protein OS=Homo sapiens GN=FN1 PE=4 SV=1	9737	265981	524	399	146	131	10493	1	0	0	603.31	1806.9	3	1806.9	0	0	40.8	0.0014	K	VTIMWTPPESAVTGYR	V			2_F80TXA20.6904.6904.3
2	E7ERA1	Uncharacterized protein OS=Homo sapiens GN=FN1 PE=4 SV=1	9737	265981	524	399	146	131	10494	1	0	0	904.46	1806.9	2	1806.9	0	0	50.4	0.00015	K	VTIMWTPPESAVTGYR	V			f69txb20.6053.6053.2
2	E7ERA1	Uncharacterized protein OS=Homo sapiens GN=FN1 PE=4 SV=1	9737	265981	524	399	146	131	10495	1	0	0	904.46	1806.9	2	1806.9	0	0	37.27	0.003	K	VTIMWTPPESAVTGYR	V			F80TXA20.6847.6847.2
2	E7ERA1	Uncharacterized protein OS=Homo sapiens GN=FN1 PE=4 SV=1	9737	265981	524	399	146	131	10601	1	0	0	910.01	1818	2	1818	0	1	37.89	0.00082	R	ITGYIIKYEKPGSPPR	E			2_F80TXA20.4323.4323.2
2	E7ERA1	Uncharacterized protein OS=Homo sapiens GN=FN1 PE=4 SV=1	9737	265981	524	399	146	131	10602	1	0	0	910.01	1818	2	1818	0	1	52.95	2.6e-05	R	ITGYIIKYEKPGSPPR	E			F80TXB20.4251.4251.2
2	E7ERA1	Uncharacterized protein OS=Homo sapiens GN=FN1 PE=4 SV=1	9737	265981	524	399	146	131	10605	1	0	0	607.01	1818.01	3	1818	0	1	32.97	0.0021	R	ITGYIIKYEKPGSPPR	E			m84txa20.3740.3740.3
2	E7ERA1	Uncharacterized protein OS=Homo sapiens GN=FN1 PE=4 SV=1	9737	265981	524	399	146	131	10606	1	0	0	607.01	1818.01	3	1818	0	1	23.81	0.018	R	ITGYIIKYEKPGSPPR	E			m84txb20.3704.3704.3
2	E7ERA1	Uncharacterized protein OS=Homo sapiens GN=FN1 PE=4 SV=1	9737	265981	524	399	146	131	10628	1	0	0	607.66	1819.94	3	1819.94	0	1	19.2	0.17	R	ARVTDATETTITISWR	T			2_F80CXA20_1.5791.5791.3
2	E7ERA1	Uncharacterized protein OS=Homo sapiens GN=FN1 PE=4 SV=1	9737	265981	524	399	146	131	10629	1	0	0	607.66	1819.94	3	1819.94	0	1	25.32	0.041	R	ARVTDATETTITISWR	T			F80CXA20_1.5795.5795.3
2	E7ERA1	Uncharacterized protein OS=Homo sapiens GN=FN1 PE=4 SV=1	9737	265981	524	399	146	131	10686	1	0	0	912.45	1822.89	2	1822.89	0	0	50.02	0.00014	K	VTIMWTPPESAVTGYR	V	Oxidation (M)	0.0001000000000000.0	f69cxa20_100930142853.5722.5722.2
2	E7ERA1	Uncharacterized protein OS=Homo sapiens GN=FN1 PE=4 SV=1	9737	265981	524	399	146	131	10687	1	0	0	912.45	1822.89	2	1822.89	0	0	46.92	0.00028	K	VTIMWTPPESAVTGYR	V	Oxidation (M)	0.0001000000000000.0	f69cxb20.5749.5749.2
2	E7ERA1	Uncharacterized protein OS=Homo sapiens GN=FN1 PE=4 SV=1	9737	265981	524	399	146	131	10688	1	0	0	608.64	1822.89	3	1822.89	0	0	15.07	0.42	K	VTIMWTPPESAVTGYR	V	Oxidation (M)	0.0001000000000000.0	f69cxb20.5772.5772.3
2	E7ERA1	Uncharacterized protein OS=Homo sapiens GN=FN1 PE=4 SV=1	9737	265981	524	399	146	131	10971	1	0	0	616.63	1846.85	3	1846.85	0	1	28.55	0.015	K	DNRGNLLQCICTGNGR	G			2_F80CXA20_1.5139.5139.3
2	E7ERA1	Uncharacterized protein OS=Homo sapiens GN=FN1 PE=4 SV=1	9737	265981	524	399	146	131	10972	1	0	0	616.63	1846.85	3	1846.85	0	1	35.75	0.0028	K	DNRGNLLQCICTGNGR	G			F80CXA20_2.5088.5088.3
2	E7ERA1	Uncharacterized protein OS=Homo sapiens GN=FN1 PE=4 SV=1	9737	265981	524	399	146	131	10974	1	0	0	924.44	1846.86	2	1846.85	0	1	16.55	0.26	K	DNRGNLLQCICTGNGR	G			F80CXA20_2.5092.5092.2
2	E7ERA1	Uncharacterized protein OS=Homo sapiens GN=FN1 PE=4 SV=1	9737	265981	524	399	146	131	11041	1	0	0	618.94	1853.8	3	1853.8	0	1	10.21	0.43	K	DSMIWDCTCIGAGRGR	I			F80CXA20_1.5635.5635.3
2	E7ERA1	Uncharacterized protein OS=Homo sapiens GN=FN1 PE=4 SV=1	9737	265981	524	399	146	131	11042	1	0	0	618.94	1853.8	3	1853.8	0	1	23.95	0.018	K	DSMIWDCTCIGAGRGR	I			2_F80CXA20_1.5608.5608.3
2	E7ERA1	Uncharacterized protein OS=Homo sapiens GN=FN1 PE=4 SV=1	9737	265981	524	399	146	131	11073	1	0	0	620	1856.98	3	1856.98	0	1	28.81	0.013	R	WKEATIPGHLNSYTIK	G			F80TXA20.4898.4898.3
2	E7ERA1	Uncharacterized protein OS=Homo sapiens GN=FN1 PE=4 SV=1	9737	265981	524	399	146	131	11074	1	0	0	620	1856.98	3	1856.98	0	1	27.18	0.019	R	WKEATIPGHLNSYTIK	G			f69cxb20.4437.4437.3
2	E7ERA1	Uncharacterized protein OS=Homo sapiens GN=FN1 PE=4 SV=1	9737	265981	524	399	146	131	11075	1	0	0	465.25	1856.98	4	1856.98	0	1	8.46	1.3	R	WKEATIPGHLNSYTIK	G			2_F80TXB20.4867.4867.4
2	E7ERA1	Uncharacterized protein OS=Homo sapiens GN=FN1 PE=4 SV=1	9737	265981	524	399	146	131	11076	2	0	0	465.25	1856.98	4	1856.98	0	1	0.93	7.5	R	WKEATIPGHLNSYTIK	G			f69txa20.4531.4531.4
2	E7ERA1	Uncharacterized protein OS=Homo sapiens GN=FN1 PE=4 SV=1	9737	265981	524	399	146	131	11077	1	0	0	929.5	1856.98	2	1856.98	0	1	32.06	0.0058	R	WKEATIPGHLNSYTIK	G			F80TXB20.4918.4918.2
2	E7ERA1	Uncharacterized protein OS=Homo sapiens GN=FN1 PE=4 SV=1	9737	265981	524	399	146	131	11078	1	0	0	929.5	1856.98	2	1856.98	0	1	61.33	6.8e-06	R	WKEATIPGHLNSYTIK	G			F80CXA20_2.4903.4903.2
2	E7ERA1	Uncharacterized protein OS=Homo sapiens GN=FN1 PE=4 SV=1	9737	265981	524	399	146	131	11140	1	0	0	621.97	1862.88	3	1862.88	0	0	40.91	0.001	R	HTSVQTTSSGSGPFTDVR	A			F80TXA20.3831.3831.3
2	E7ERA1	Uncharacterized protein OS=Homo sapiens GN=FN1 PE=4 SV=1	9737	265981	524	399	146	131	11141	1	0	0	621.97	1862.88	3	1862.88	0	0	52.95	6.4e-05	R	HTSVQTTSSGSGPFTDVR	A			m84txa20.3392.3392.3
2	E7ERA1	Uncharacterized protein OS=Homo sapiens GN=FN1 PE=4 SV=1	9737	265981	524	399	146	131	11142	1	0	0	932.45	1862.88	2	1862.88	0	0	111.12	9.7e-11	R	HTSVQTTSSGSGPFTDVR	A			f69cxa20_100930142853.3357.3357.2
2	E7ERA1	Uncharacterized protein OS=Homo sapiens GN=FN1 PE=4 SV=1	9737	265981	524	399	146	131	11143	1	0	0	932.45	1862.88	2	1862.88	0	0	82.93	6.4e-08	R	HTSVQTTSSGSGPFTDVR	A			F80CXA20_1.3889.3889.2
2	E7ERA1	Uncharacterized protein OS=Homo sapiens GN=FN1 PE=4 SV=1	9737	265981	524	399	146	131	11212	1	0	0	936.38	1870.74	2	1870.74	0	0	29.02	0.0024	R	QGENGQMMSCTCLGNGK	G			f69cxb20_100930171645.3391.3391.2
2	E7ERA1	Uncharacterized protein OS=Homo sapiens GN=FN1 PE=4 SV=1	9737	265981	524	399	146	131	11213	1	0	0	936.38	1870.74	2	1870.74	0	0	71.62	1.3e-07	R	QGENGQMMSCTCLGNGK	G			F80TXB20.3696.3696.2
2	E7ERA1	Uncharacterized protein OS=Homo sapiens GN=FN1 PE=4 SV=1	9737	265981	524	399	146	131	11298	1	0	0	939.9	1877.79	2	1877.79	0	0	44.87	9e-05	K	EYLGAICSCTCFGGQR	G			2_F80TXB20.8738.8738.2
2	E7ERA1	Uncharacterized protein OS=Homo sapiens GN=FN1 PE=4 SV=1	9737	265981	524	399	146	131	11299	1	0	0	939.9	1877.79	2	1877.79	0	0	52.64	1.5e-05	K	EYLGAICSCTCFGGQR	G			m84txb20.7948.7948.2
2	E7ERA1	Uncharacterized protein OS=Homo sapiens GN=FN1 PE=4 SV=1	9737	265981	524	399	146	131	11300	1	0	0	626.94	1877.79	3	1877.79	0	0	41.56	0.00019	K	EYLGAICSCTCFGGQR	G			f69cxb20.4943.4943.3
2	E7ERA1	Uncharacterized protein OS=Homo sapiens GN=FN1 PE=4 SV=1	9737	265981	524	399	146	131	11301	1	0	0	626.94	1877.79	3	1877.79	0	0	56.49	6.2e-06	K	EYLGAICSCTCFGGQR	G			F80CXA20_1.5487.5487.3
2	E7ERA1	Uncharacterized protein OS=Homo sapiens GN=FN1 PE=4 SV=1	9737	265981	524	399	146	131	11302	1	0	0	939.9	1877.79	2	1877.79	0	0	89.71	2.9e-09	K	EYLGAICSCTCFGGQR	G			2_F80TXA20.5533.5533.2
2	E7ERA1	Uncharacterized protein OS=Homo sapiens GN=FN1 PE=4 SV=1	9737	265981	524	399	146	131	11303	1	0	0	939.9	1877.79	2	1877.79	0	0	85.21	8.3e-09	K	EYLGAICSCTCFGGQR	G			F80TXB20.5433.5433.2
2	E7ERA1	Uncharacterized protein OS=Homo sapiens GN=FN1 PE=4 SV=1	9737	265981	524	399	146	131	11304	1	0	0	939.91	1877.8	2	1877.79	0.01	0	37.44	0.00061	K	EYLGAICSCTCFGGQR	G			m84txb20.6389.6389.2
2	E7ERA1	Uncharacterized protein OS=Homo sapiens GN=FN1 PE=4 SV=1	9737	265981	524	399	146	131	11305	1	0	0	939.91	1877.8	2	1877.79	0.01	0	56.71	7.3e-06	K	EYLGAICSCTCFGGQR	G			m84txb20.6617.6617.2
2	E7ERA1	Uncharacterized protein OS=Homo sapiens GN=FN1 PE=4 SV=1	9737	265981	524	399	146	131	11306	1	0	0	939.91	1877.8	2	1877.79	0.01	0	61.4	2.5e-06	K	EYLGAICSCTCFGGQR	G			m84txb20.6649.6649.2
2	E7ERA1	Uncharacterized protein OS=Homo sapiens GN=FN1 PE=4 SV=1	9737	265981	524	399	146	131	11507	1	0	0	949.39	1896.76	2	1896.76	-0.01	1	9.53	0.12	R	CDSSRWCHDNGVNYK	I			2_F80CXA20_2.2879.2879.2
2	E7ERA1	Uncharacterized protein OS=Homo sapiens GN=FN1 PE=4 SV=1	9737	265981	524	399	146	131	11680	1	0	0	638.34	1911.98	3	1911.99	-0.01	0	4.31	5.5	R	SSPVVIDASTAIDAPSNLR	F			m84txa20.7272.7272.3
2	E7ERA1	Uncharacterized protein OS=Homo sapiens GN=FN1 PE=4 SV=1	9737	265981	524	399	146	131	11682	1	0	0	957	1911.99	2	1911.99	0	0	68.43	1.8e-06	R	SSPVVIDASTAIDAPSNLR	F			m84txb20.5005.5005.2
2	E7ERA1	Uncharacterized protein OS=Homo sapiens GN=FN1 PE=4 SV=1	9737	265981	524	399	146	131	11683	1	0	0	957	1911.99	2	1911.99	0	0	72.57	7e-07	R	SSPVVIDASTAIDAPSNLR	F			f69cxb20_100930171645.5141.5141.2
2	E7ERA1	Uncharacterized protein OS=Homo sapiens GN=FN1 PE=4 SV=1	9737	265981	524	399	146	131	11684	1	0	0	638.34	1911.99	3	1911.99	0	0	40.66	0.001	R	SSPVVIDASTAIDAPSNLR	F			F80TXA20.5975.5975.3
2	E7ERA1	Uncharacterized protein OS=Homo sapiens GN=FN1 PE=4 SV=1	9737	265981	524	399	146	131	11685	1	0	0	638.34	1911.99	3	1911.99	0	0	52.49	6.8e-05	R	SSPVVIDASTAIDAPSNLR	F			2_F80CXA20_2.5995.5995.3
2	E7ERA1	Uncharacterized protein OS=Homo sapiens GN=FN1 PE=4 SV=1	9737	265981	524	399	146	131	11686	1	0	0	957	1911.99	2	1911.99	0	0	70.61	1e-06	R	SSPVVIDASTAIDAPSNLR	F			f69txa20.5661.5661.2
2	E7ERA1	Uncharacterized protein OS=Homo sapiens GN=FN1 PE=4 SV=1	9737	265981	524	399	146	131	11687	1	0	0	957	1911.99	2	1911.99	0	0	78.32	1.8e-07	R	SSPVVIDASTAIDAPSNLR	F			f69cxa20_100930142853.5375.5375.2
2	E7ERA1	Uncharacterized protein OS=Homo sapiens GN=FN1 PE=4 SV=1	9737	265981	524	399	146	131	11855	1	0	0	964.02	1926.03	2	1926.04	-0.01	0	64.04	3.4e-06	R	FLATTPNSLLVSWQPPR	A			m84cxb20.6733.6733.2
2	E7ERA1	Uncharacterized protein OS=Homo sapiens GN=FN1 PE=4 SV=1	9737	265981	524	399	146	131	11856	1	0	0	964.02	1926.03	2	1926.04	-0.01	0	69.11	1.1e-06	R	FLATTPNSLLVSWQPPR	A			m84txa20.6980.6980.2
2	E7ERA1	Uncharacterized protein OS=Homo sapiens GN=FN1 PE=4 SV=1	9737	265981	524	399	146	131	11857	1	0	0	643.02	1926.04	3	1926.04	0	0	60.81	6.9e-06	R	FLATTPNSLLVSWQPPR	A			2_F80CXA20_2.7674.7674.3
2	E7ERA1	Uncharacterized protein OS=Homo sapiens GN=FN1 PE=4 SV=1	9737	265981	524	399	146	131	11858	1	0	0	643.02	1926.04	3	1926.04	0	0	58.54	1.2e-05	R	FLATTPNSLLVSWQPPR	A			f69cxa20.6980.6980.3
2	E7ERA1	Uncharacterized protein OS=Homo sapiens GN=FN1 PE=4 SV=1	9737	265981	524	399	146	131	12114	1	0	0	652.34	1954	3	1954	0	0	39.57	0.0016	R	EESPLLIGQQSTVSDVPR	D			f69cxb20.5269.5269.3
2	E7ERA1	Uncharacterized protein OS=Homo sapiens GN=FN1 PE=4 SV=1	9737	265981	524	399	146	131	12115	1	0	0	652.34	1954	3	1954	0	0	43.45	0.00063	R	EESPLLIGQQSTVSDVPR	D			f69cxb20_100930171645.5237.5237.3
2	E7ERA1	Uncharacterized protein OS=Homo sapiens GN=FN1 PE=4 SV=1	9737	265981	524	399	146	131	12116	1	0	0	978.01	1954	2	1954	0	0	72.89	6.5e-07	R	EESPLLIGQQSTVSDVPR	D			m84txa20.5162.5162.2
2	E7ERA1	Uncharacterized protein OS=Homo sapiens GN=FN1 PE=4 SV=1	9737	265981	524	399	146	131	12117	1	0	0	978.01	1954	2	1954	0	0	75.23	3.8e-07	R	EESPLLIGQQSTVSDVPR	D			f69cxa20.5134.5134.2
2	E7ERA1	Uncharacterized protein OS=Homo sapiens GN=FN1 PE=4 SV=1	9737	265981	524	399	146	131	12194	1	0	0	654.98	1961.92	3	1961.92	0	1	5.05	2.9	R	GNLLQCICTGNGRGEWK	C			f69txb20.5045.5045.3
2	E7ERA1	Uncharacterized protein OS=Homo sapiens GN=FN1 PE=4 SV=1	9737	265981	524	399	146	131	12195	1	0	0	654.98	1961.92	3	1961.92	0	1	10.09	0.91	R	GNLLQCICTGNGRGEWK	C			m84cxb20.5038.5038.3
2	E7ERA1	Uncharacterized protein OS=Homo sapiens GN=FN1 PE=4 SV=1	9737	265981	524	399	146	131	12196	1	0	0	981.98	1961.94	2	1961.92	0.02	1	47.03	0.00024	R	GNLLQCICTGNGRGEWK	C			F80TXB20.5784.5784.2
2	E7ERA1	Uncharacterized protein OS=Homo sapiens GN=FN1 PE=4 SV=1	9737	265981	524	399	146	131	12197	1	0	0	981.98	1961.94	2	1961.92	0.02	1	45.72	0.00032	R	GNLLQCICTGNGRGEWK	C			F80CXA20_2.5755.5755.2
2	E7ERA1	Uncharacterized protein OS=Homo sapiens GN=FN1 PE=4 SV=1	9737	265981	524	399	146	131	12348	1	0	0	989.03	1976.04	2	1976.04	0	1	51.95	5.5e-05	K	WLPSSSPVTGYRVTTTPK	N			F80TXB20.5207.5207.2
2	E7ERA1	Uncharacterized protein OS=Homo sapiens GN=FN1 PE=4 SV=1	9737	265981	524	399	146	131	12349	1	0	0	989.03	1976.04	2	1976.04	0	1	60.27	8.1e-06	K	WLPSSSPVTGYRVTTTPK	N			2_F80CXA20_1.5213.5213.2
2	E7ERA1	Uncharacterized protein OS=Homo sapiens GN=FN1 PE=4 SV=1	9737	265981	524	399	146	131	12405	1	0	0	496.97	1983.85	4	1983.85	0	1	34.42	0.0012	R	IGDQWDKQHDMGHMMR	C			F80CXA20_1.3910.3910.4
2	E7ERA1	Uncharacterized protein OS=Homo sapiens GN=FN1 PE=4 SV=1	9737	265981	524	399	146	131	12406	1	0	0	496.97	1983.85	4	1983.85	0	1	27.17	0.0064	R	IGDQWDKQHDMGHMMR	C			F80TXB20.3885.3885.4
2	E7ERA1	Uncharacterized protein OS=Homo sapiens GN=FN1 PE=4 SV=1	9737	265981	524	399	146	131	12407	1	0	0	662.29	1983.85	3	1983.85	0	1	48.55	4.5e-05	R	IGDQWDKQHDMGHMMR	C			F80TXA20.3837.3837.3
2	E7ERA1	Uncharacterized protein OS=Homo sapiens GN=FN1 PE=4 SV=1	9737	265981	524	399	146	131	12408	1	0	0	662.29	1983.85	3	1983.85	0	1	26.01	0.008	R	IGDQWDKQHDMGHMMR	C			f69cxa20_100930142853.3587.3587.3
2	E7ERA1	Uncharacterized protein OS=Homo sapiens GN=FN1 PE=4 SV=1	9737	265981	524	399	146	131	12409	1	0	0	992.93	1983.85	2	1983.85	0	1	14.37	0.12	R	IGDQWDKQHDMGHMMR	C			2_F80CXA20_1.3903.3903.2
2	E7ERA1	Uncharacterized protein OS=Homo sapiens GN=FN1 PE=4 SV=1	9737	265981	524	399	146	131	12410	1	0	0	992.93	1983.85	2	1983.85	0	1	58.78	4.2e-06	R	IGDQWDKQHDMGHMMR	C			F80CXA20_2.3873.3873.2
2	E7ERA1	Uncharacterized protein OS=Homo sapiens GN=FN1 PE=4 SV=1	9737	265981	524	399	146	131	12488	1	0	0	997.5	1992.98	2	1992.98	0	0	78.12	2.3e-07	R	NTFAEVTGLSPGVTYYFK	V			2_F80TXB20.7406.7406.2
2	E7ERA1	Uncharacterized protein OS=Homo sapiens GN=FN1 PE=4 SV=1	9737	265981	524	399	146	131	12489	1	0	0	997.5	1992.98	2	1992.98	0	0	84.13	5.7e-08	R	NTFAEVTGLSPGVTYYFK	V			F80CXA20_1.7468.7468.2
2	E7ERA1	Uncharacterized protein OS=Homo sapiens GN=FN1 PE=4 SV=1	9737	265981	524	399	146	131	12492	1	0	0	665.34	1992.99	3	1992.98	0	0	55.8	4.2e-05	R	NTFAEVTGLSPGVTYYFK	V			f69txa20.7038.7038.3
2	E7ERA1	Uncharacterized protein OS=Homo sapiens GN=FN1 PE=4 SV=1	9737	265981	524	399	146	131	12493	1	0	0	665.34	1992.99	3	1992.98	0	0	62.21	9.6e-06	R	NTFAEVTGLSPGVTYYFK	V			m84txa20.6778.6778.3
2	E7ERA1	Uncharacterized protein OS=Homo sapiens GN=FN1 PE=4 SV=1	9737	265981	524	399	146	131	12565	1	0	0	667.62	1999.84	3	1999.85	0	1	23.28	0.015	R	IGDQWDKQHDMGHMMR	C	Oxidation (M)	0.0000000000100000.0	F80CXA20_2.3100.3100.3
2	E7ERA1	Uncharacterized protein OS=Homo sapiens GN=FN1 PE=4 SV=1	9737	265981	524	399	146	131	12566	1	0	0	667.62	1999.84	3	1999.85	0	1	19.3	0.037	R	IGDQWDKQHDMGHMMR	C	Oxidation (M)	0.0000000000000100.0	2_F80CXA20_1.3133.3133.3
2	E7ERA1	Uncharacterized protein OS=Homo sapiens GN=FN1 PE=4 SV=1	9737	265981	524	399	146	131	13046	1	0	0	1024.42	2046.83	2	2046.83	0	0	62.7	5.4e-07	R	GFNCESKPEAEETCFDK	Y			m84cxa20.3491.3491.2
2	E7ERA1	Uncharacterized protein OS=Homo sapiens GN=FN1 PE=4 SV=1	9737	265981	524	399	146	131	13047	1	0	0	1024.42	2046.83	2	2046.83	0	0	46.88	2.1e-05	R	GFNCESKPEAEETCFDK	Y			2_F80TXA20.3712.3712.2
2	E7ERA1	Uncharacterized protein OS=Homo sapiens GN=FN1 PE=4 SV=1	9737	265981	524	399	146	131	13048	1	0	0	683.29	2046.83	3	2046.83	0	0	45.22	3e-05	R	GFNCESKPEAEETCFDK	Y			m84txb20.3137.3137.3
2	E7ERA1	Uncharacterized protein OS=Homo sapiens GN=FN1 PE=4 SV=1	9737	265981	524	399	146	131	13049	1	0	0	683.29	2046.83	3	2046.83	0	0	51.77	6.7e-06	R	GFNCESKPEAEETCFDK	Y			2_F80CXA20_1.3679.3679.3
2	E7ERA1	Uncharacterized protein OS=Homo sapiens GN=FN1 PE=4 SV=1	9737	265981	524	399	146	131	13250	1	0	0	692.29	2073.86	3	2073.85	0.01	1	49.82	1.7e-05	R	DNMKWCGTTQNYDADQK	F			2_F80CXA20_2.3689.3689.3
2	E7ERA1	Uncharacterized protein OS=Homo sapiens GN=FN1 PE=4 SV=1	9737	265981	524	399	146	131	13251	1	0	0	692.29	2073.86	3	2073.85	0.01	1	56.31	3.9e-06	R	DNMKWCGTTQNYDADQK	F			m84txb20.3161.3161.3
2	E7ERA1	Uncharacterized protein OS=Homo sapiens GN=FN1 PE=4 SV=1	9737	265981	524	399	146	131	13381	1	0	0	697.62	2089.85	3	2089.85	0	1	45.35	6e-05	R	DNMKWCGTTQNYDADQK	F	Oxidation (M)	0.00100000000000000.0	F80CXA20_1.3110.3110.3
2	E7ERA1	Uncharacterized protein OS=Homo sapiens GN=FN1 PE=4 SV=1	9737	265981	524	399	146	131	13382	1	0	0	697.62	2089.85	3	2089.85	0	1	40.57	0.00018	R	DNMKWCGTTQNYDADQK	F	Oxidation (M)	0.00100000000000000.0	2_F80CXA20_2.3089.3089.3
2	E7ERA1	Uncharacterized protein OS=Homo sapiens GN=FN1 PE=4 SV=1	9737	265981	524	399	146	131	13383	1	0	0	1045.93	2089.85	2	2089.85	0	1	19.09	0.025	R	DNMKWCGTTQNYDADQK	F	Oxidation (M)	0.00100000000000000.0	2_F80CXA20_2.3108.3108.2
2	E7ERA1	Uncharacterized protein OS=Homo sapiens GN=FN1 PE=4 SV=1	9737	265981	524	399	146	131	13556	1	0	0	706.38	2116.11	3	2116.11	0	0	59.48	1.1e-05	K	EINLAPDSSSVVVSGLMVATK	Y			f69cxb20_100930171645.6704.6704.3
2	E7ERA1	Uncharacterized protein OS=Homo sapiens GN=FN1 PE=4 SV=1	9737	265981	524	399	146	131	13557	1	0	0	706.38	2116.11	3	2116.11	0	0	46.72	0.0002	K	EINLAPDSSSVVVSGLMVATK	Y			f69cxb20.6718.6718.3
2	E7ERA1	Uncharacterized protein OS=Homo sapiens GN=FN1 PE=4 SV=1	9737	265981	524	399	146	131	13558	1	0	0	1059.06	2116.11	2	2116.11	0	0	76.21	2.4e-07	K	EINLAPDSSSVVVSGLMVATK	Y			f69txb20.6477.6477.2
2	E7ERA1	Uncharacterized protein OS=Homo sapiens GN=FN1 PE=4 SV=1	9737	265981	524	399	146	131	13559	1	0	0	1059.06	2116.11	2	2116.11	0	0	78.07	1.6e-07	K	EINLAPDSSSVVVSGLMVATK	Y			2_F80CXA20_1.7335.7335.2
2	E7ERA1	Uncharacterized protein OS=Homo sapiens GN=FN1 PE=4 SV=1	9737	265981	524	399	146	131	13660	1	0	0	1067.06	2132.1	2	2132.1	0	0	58.27	1.9e-05	K	EINLAPDSSSVVVSGLMVATK	Y	Oxidation (M)	0.000000000000000010000.0	f69cxb20.6180.6180.2
2	E7ERA1	Uncharacterized protein OS=Homo sapiens GN=FN1 PE=4 SV=1	9737	265981	524	399	146	131	13661	1	0	0	1067.06	2132.1	2	2132.1	0	0	74.67	4.2e-07	K	EINLAPDSSSVVVSGLMVATK	Y	Oxidation (M)	0.000000000000000010000.0	2_F80TXA20.6840.6840.2
2	E7ERA1	Uncharacterized protein OS=Homo sapiens GN=FN1 PE=4 SV=1	9737	265981	524	399	146	131	13813	1	0	0	718.73	2153.17	3	2153.17	0	1	20.17	0.041	R	FLATTPNSLLVSWQPPRAR	I			F80CXA20_1.7207.7207.3
2	E7ERA1	Uncharacterized protein OS=Homo sapiens GN=FN1 PE=4 SV=1	9737	265981	524	399	146	131	13814	1	0	0	718.73	2153.17	3	2153.17	0	1	14.87	0.14	R	FLATTPNSLLVSWQPPRAR	I			2_F80CXA20_1.7191.7191.3
2	E7ERA1	Uncharacterized protein OS=Homo sapiens GN=FN1 PE=4 SV=1	9737	265981	524	399	146	131	13815	1	0	0	539.3	2153.18	4	2153.17	0	1	40.76	0.00036	R	FLATTPNSLLVSWQPPRAR	I			F80TXA20.7208.7208.4
2	E7ERA1	Uncharacterized protein OS=Homo sapiens GN=FN1 PE=4 SV=1	9737	265981	524	399	146	131	13816	1	0	0	539.3	2153.18	4	2153.17	0	1	0.78	3.6	R	FLATTPNSLLVSWQPPRAR	I			2_F80TXB20.7088.7088.4
2	E7ERA1	Uncharacterized protein OS=Homo sapiens GN=FN1 PE=4 SV=1	9737	265981	524	399	146	131	13926	1	0	0	723.35	2167.04	3	2167.04	0	0	7.61	1.7	R	ITYGETGGNSPVQEFTVPGSK	S			F80TXB20.4906.4906.3
2	E7ERA1	Uncharacterized protein OS=Homo sapiens GN=FN1 PE=4 SV=1	9737	265981	524	399	146	131	13928	1	0	0	723.36	2167.05	3	2167.04	0	0	36.93	0.0022	R	ITYGETGGNSPVQEFTVPGSK	S			f69cxb20_100930171645.5123.5123.3
2	E7ERA1	Uncharacterized protein OS=Homo sapiens GN=FN1 PE=4 SV=1	9737	265981	524	399	146	131	13929	1	0	0	723.36	2167.05	3	2167.04	0	0	37.34	0.002	R	ITYGETGGNSPVQEFTVPGSK	S			m84cxb20.4913.4913.3
2	E7ERA1	Uncharacterized protein OS=Homo sapiens GN=FN1 PE=4 SV=1	9737	265981	524	399	146	131	13930	1	0	0	1084.53	2167.05	2	2167.04	0	0	72.65	5.6e-07	R	ITYGETGGNSPVQEFTVPGSK	S			F80CXA20_2.5656.5656.2
2	E7ERA1	Uncharacterized protein OS=Homo sapiens GN=FN1 PE=4 SV=1	9737	265981	524	399	146	131	13931	1	0	0	1084.53	2167.05	2	2167.04	0	0	59.91	1.1e-05	R	ITYGETGGNSPVQEFTVPGSK	S			f69cxa20.5030.5030.2
2	E7ERA1	Uncharacterized protein OS=Homo sapiens GN=FN1 PE=4 SV=1	9737	265981	524	399	146	131	14007	1	0	0	545.25	2176.99	4	2176.98	0	0	1.79	5.5	R	RPHETGGYMLECVCLGNGK	G			f69txa20.4812.4812.4
2	E7ERA1	Uncharacterized protein OS=Homo sapiens GN=FN1 PE=4 SV=1	9737	265981	524	399	146	131	14008	1	0	0	545.25	2176.99	4	2176.98	0	0	11.38	0.61	R	RPHETGGYMLECVCLGNGK	G			f69cxb20.4712.4712.4
2	E7ERA1	Uncharacterized protein OS=Homo sapiens GN=FN1 PE=4 SV=1	9737	265981	524	399	146	131	14135	1	0	0	732	2192.98	3	2192.98	0	0	44.89	0.00023	R	RPHETGGYMLECVCLGNGK	G	Oxidation (M)	0.0000000010000000000.0	2_F80TXB20.4336.4336.3
2	E7ERA1	Uncharacterized protein OS=Homo sapiens GN=FN1 PE=4 SV=1	9737	265981	524	399	146	131	14136	1	0	0	732	2192.98	3	2192.98	0	0	41.06	0.00056	R	RPHETGGYMLECVCLGNGK	G	Oxidation (M)	0.0000000010000000000.0	2_F80TXA20.4440.4440.3
2	E7ERA1	Uncharacterized protein OS=Homo sapiens GN=FN1 PE=4 SV=1	9737	265981	524	399	146	131	14150	1	0	0	1098.61	2195.21	2	2195.22	-0.01	1	17.85	0.07	R	VDVIPVNLPGEHGQRLPISR	N			f69cxa20.5329.5329.2
2	E7ERA1	Uncharacterized protein OS=Homo sapiens GN=FN1 PE=4 SV=1	9737	265981	524	399	146	131	14151	1	0	0	549.81	2195.22	4	2195.22	0	1	2.65	1.9	R	VDVIPVNLPGEHGQRLPISR	N			f69cxa20_100930142853.5429.5429.4
2	E7ERA1	Uncharacterized protein OS=Homo sapiens GN=FN1 PE=4 SV=1	9737	265981	524	399	146	131	14152	2	0	0	549.81	2195.22	4	2195.22	0	1	1.75	2.3	R	VDVIPVNLPGEHGQRLPISR	N			f69txb20.5200.5200.4
2	E7ERA1	Uncharacterized protein OS=Homo sapiens GN=FN1 PE=4 SV=1	9737	265981	524	399	146	131	14153	1	0	0	732.75	2195.22	3	2195.22	0	1	10.77	0.29	R	VDVIPVNLPGEHGQRLPISR	N			f69cxb20.5421.5421.3
2	E7ERA1	Uncharacterized protein OS=Homo sapiens GN=FN1 PE=4 SV=1	9737	265981	524	399	146	131	14154	1	0	0	732.75	2195.22	3	2195.22	0	1	0.74	2.9	R	VDVIPVNLPGEHGQRLPISR	N			f69cxb20_100930171645.5447.5447.3
2	E7ERA1	Uncharacterized protein OS=Homo sapiens GN=FN1 PE=4 SV=1	9737	265981	524	399	146	131	14157	1	0	0	1098.97	2195.92	2	2195.92	0	0	60.38	3.2e-06	R	QDGHLWCSTTSNYEQDQK	Y			f69txb20.3310.3310.2
2	E7ERA1	Uncharacterized protein OS=Homo sapiens GN=FN1 PE=4 SV=1	9737	265981	524	399	146	131	14158	1	0	0	1098.97	2195.92	2	2195.92	0	0	47.26	6.5e-05	R	QDGHLWCSTTSNYEQDQK	Y			f69cxb20.3492.3492.2
2	E7ERA1	Uncharacterized protein OS=Homo sapiens GN=FN1 PE=4 SV=1	9737	265981	524	399	146	131	14159	1	0	0	732.98	2195.92	3	2195.92	0	0	60.25	3.3e-06	R	QDGHLWCSTTSNYEQDQK	Y			m84txb20.3355.3355.3
2	E7ERA1	Uncharacterized protein OS=Homo sapiens GN=FN1 PE=4 SV=1	9737	265981	524	399	146	131	14160	1	0	0	732.98	2195.92	3	2195.92	0	0	50.41	3.1e-05	R	QDGHLWCSTTSNYEQDQK	Y			f69cxa20.3337.3337.3
2	E7ERA1	Uncharacterized protein OS=Homo sapiens GN=FN1 PE=4 SV=1	9737	265981	524	399	146	131	15011	1	0	0	770.36	2308.05	3	2308.05	0	1	56.48	1.8e-05	K	CERHTSVQTTSSGSGPFTDVR	A			2_F80CXA20_1.3609.3609.3
2	E7ERA1	Uncharacterized protein OS=Homo sapiens GN=FN1 PE=4 SV=1	9737	265981	524	399	146	131	15012	1	0	0	770.36	2308.05	3	2308.05	0	1	56.34	1.8e-05	K	CERHTSVQTTSSGSGPFTDVR	A			F80CXA20_1.3608.3608.3
2	E7ERA1	Uncharacterized protein OS=Homo sapiens GN=FN1 PE=4 SV=1	9737	265981	524	399	146	131	15176	1	0	0	1166.99	2331.97	2	2331.97	0	1	25.23	0.0078	R	QGENGQMMSCTCLGNGKGEFK	C			2_F80CXA20_2.4279.4279.2
2	E7ERA1	Uncharacterized protein OS=Homo sapiens GN=FN1 PE=4 SV=1	9737	265981	524	399	146	131	15177	1	0	0	1166.99	2331.97	2	2331.97	0	1	3.11	1.3	R	QGENGQMMSCTCLGNGKGEFK	C			2_F80TXB20.4302.4302.2
2	E7ERA1	Uncharacterized protein OS=Homo sapiens GN=FN1 PE=4 SV=1	9737	265981	524	399	146	131	15178	1	0	0	778.34	2331.99	3	2331.97	0.02	1	46.45	9.4e-05	R	QGENGQMMSCTCLGNGKGEFK	C			2_F80TXA20.4311.4311.3
2	E7ERA1	Uncharacterized protein OS=Homo sapiens GN=FN1 PE=4 SV=1	9737	265981	524	399	146	131	15221	1	0	0	1169.62	2337.22	2	2337.23	-0.01	0	45.7	0.00024	K	DTLTSRPAQGVVTTLENVSPPR	R			m84cxa20.5935.5935.2
2	E7ERA1	Uncharacterized protein OS=Homo sapiens GN=FN1 PE=4 SV=1	9737	265981	524	399	146	131	15222	1	0	0	1169.62	2337.22	2	2337.23	-0.01	0	66.82	1.8e-06	K	DTLTSRPAQGVVTTLENVSPPR	R			f69cxb20.5622.5622.2
2	E7ERA1	Uncharacterized protein OS=Homo sapiens GN=FN1 PE=4 SV=1	9737	265981	524	399	146	131	15223	1	0	0	780.08	2337.23	3	2337.23	0	0	31.18	0.0061	K	DTLTSRPAQGVVTTLENVSPPR	R			f69cxb20_100930171645.5672.5672.3
2	E7ERA1	Uncharacterized protein OS=Homo sapiens GN=FN1 PE=4 SV=1	9737	265981	524	399	146	131	15224	1	0	0	780.08	2337.23	3	2337.23	0	0	19.61	0.088	K	DTLTSRPAQGVVTTLENVSPPR	R			m84cxb20.5444.5444.3
2	E7ERA1	Uncharacterized protein OS=Homo sapiens GN=FN1 PE=4 SV=1	9737	265981	524	399	146	131	15258	1	0	0	1172.1	2342.19	2	2342.19	0	0	17.91	0.18	K	TETITGFQVDAVPANGQTPIQR	T			f69cxb20_100930171645.5409.5409.2
2	E7ERA1	Uncharacterized protein OS=Homo sapiens GN=FN1 PE=4 SV=1	9737	265981	524	399	146	131	15259	1	0	0	1172.1	2342.19	2	2342.19	0	0	65.95	2.8e-06	K	TETITGFQVDAVPANGQTPIQR	T			f69txa20.5465.5465.2
2	E7ERA1	Uncharacterized protein OS=Homo sapiens GN=FN1 PE=4 SV=1	9737	265981	524	399	146	131	15260	1	0	0	781.74	2342.19	3	2342.19	0	0	44.85	0.00037	K	TETITGFQVDAVPANGQTPIQR	T			f69txa20.5534.5534.3
2	E7ERA1	Uncharacterized protein OS=Homo sapiens GN=FN1 PE=4 SV=1	9737	265981	524	399	146	131	15261	1	0	0	781.74	2342.19	3	2342.19	0	0	15.12	0.35	K	TETITGFQVDAVPANGQTPIQR	T			m84txa20.5379.5379.3
2	E7ERA1	Uncharacterized protein OS=Homo sapiens GN=FN1 PE=4 SV=1	9737	265981	524	399	146	131	15558	1	0	0	796.7	2387.07	3	2387.06	0.01	1	35.5	0.0016	R	CTCVGNGRGEWTCIAYSQLR	D			F80TXA20.5606.5606.3
2	E7ERA1	Uncharacterized protein OS=Homo sapiens GN=FN1 PE=4 SV=1	9737	265981	524	399	146	131	15559	1	0	0	796.7	2387.07	3	2387.06	0.01	1	47.8	9.6e-05	R	CTCVGNGRGEWTCIAYSQLR	D			F80TXB20.5627.5627.3
2	E7ERA1	Uncharacterized protein OS=Homo sapiens GN=FN1 PE=4 SV=1	9737	265981	524	399	146	131	15596	1	0	0	1198.55	2395.08	2	2395.08	0	0	24.26	0.025	R	RPGGEPSPEGTTGQSYNQYSQR	Y			m84txa20.2595.2595.2
2	E7ERA1	Uncharacterized protein OS=Homo sapiens GN=FN1 PE=4 SV=1	9737	265981	524	399	146	131	15597	1	0	0	1198.55	2395.08	2	2395.08	0	0	54.42	2.4e-05	R	RPGGEPSPEGTTGQSYNQYSQR	Y			F80TXA20.2884.2884.2
2	E7ERA1	Uncharacterized protein OS=Homo sapiens GN=FN1 PE=4 SV=1	9737	265981	524	399	146	131	15598	1	0	0	799.37	2395.08	3	2395.08	0	0	64.61	2.4e-06	R	RPGGEPSPEGTTGQSYNQYSQR	Y			F80CXA20_2.2901.2901.3
2	E7ERA1	Uncharacterized protein OS=Homo sapiens GN=FN1 PE=4 SV=1	9737	265981	524	399	146	131	15599	1	0	0	799.37	2395.08	3	2395.08	0	0	65.54	2e-06	R	RPGGEPSPEGTTGQSYNQYSQR	Y			2_F80CXA20_1.2930.2930.3
2	E7ERA1	Uncharacterized protein OS=Homo sapiens GN=FN1 PE=4 SV=1	9737	265981	524	399	146	131	15716	1	0	0	605.28	2417.11	4	2417.11	0	1	16.44	0.15	R	MSESGFKLLCQCLGFGSGHFR	C			2_F80CXA20_2.7082.7082.4
2	E7ERA1	Uncharacterized protein OS=Homo sapiens GN=FN1 PE=4 SV=1	9737	265981	524	399	146	131	15717	1	0	0	605.28	2417.11	4	2417.11	0	1	19	0.085	R	MSESGFKLLCQCLGFGSGHFR	C			F80TXB20.7115.7115.4
2	E7ERA1	Uncharacterized protein OS=Homo sapiens GN=FN1 PE=4 SV=1	9737	265981	524	399	146	131	15964	1	0	0	1231.61	2461.2	2	2461.2	0	0	29.95	0.013	R	TEIDKPSQMQVTDVQDNSISVK	W			m84cxb20.4057.4057.2
2	E7ERA1	Uncharacterized protein OS=Homo sapiens GN=FN1 PE=4 SV=1	9737	265981	524	399	146	131	15965	1	0	0	1231.61	2461.2	2	2461.2	0	0	42.83	0.00069	R	TEIDKPSQMQVTDVQDNSISVK	W			F80CXA20_2.4686.4686.2
2	E7ERA1	Uncharacterized protein OS=Homo sapiens GN=FN1 PE=4 SV=1	9737	265981	524	399	146	131	15966	1	0	0	821.41	2461.2	3	2461.2	0	0	40.63	0.0012	R	TEIDKPSQMQVTDVQDNSISVK	W			f69txa20.4321.4321.3
2	E7ERA1	Uncharacterized protein OS=Homo sapiens GN=FN1 PE=4 SV=1	9737	265981	524	399	146	131	15967	1	0	0	821.41	2461.2	3	2461.2	0	0	52.46	7.7e-05	R	TEIDKPSQMQVTDVQDNSISVK	W			m84txb20.4169.4169.3
2	E7ERA1	Uncharacterized protein OS=Homo sapiens GN=FN1 PE=4 SV=1	9737	265981	524	399	146	131	16025	1	0	0	824.1	2469.29	3	2469.31	-0.02	0	9.88	0.68	K	STATISGLKPGVDYTITVYAVTGR	G			2_F80CXA20_2.8589.8589.3
2	E7ERA1	Uncharacterized protein OS=Homo sapiens GN=FN1 PE=4 SV=1	9737	265981	524	399	146	131	16026	1	0	0	824.1	2469.29	3	2469.31	-0.02	0	8.43	0.95	K	STATISGLKPGVDYTITVYAVTGR	G			2_F80CXA20_1.8638.8638.3
2	E7ERA1	Uncharacterized protein OS=Homo sapiens GN=FN1 PE=4 SV=1	9737	265981	524	399	146	131	16027	1	0	0	618.33	2469.3	4	2469.31	-0.01	0	1.97	4.5	K	STATISGLKPGVDYTITVYAVTGR	G			2_F80CXA20_1.6824.6824.4
2	E7ERA1	Uncharacterized protein OS=Homo sapiens GN=FN1 PE=4 SV=1	9737	265981	524	399	146	131	16028	1	0	0	1235.66	2469.31	2	2469.31	0	0	70.56	5.7e-07	K	STATISGLKPGVDYTITVYAVTGR	G			2_F80CXA20_1.6802.6802.2
2	E7ERA1	Uncharacterized protein OS=Homo sapiens GN=FN1 PE=4 SV=1	9737	265981	524	399	146	131	16029	1	0	0	1235.66	2469.31	2	2469.31	0	0	69.45	7.3e-07	K	STATISGLKPGVDYTITVYAVTGR	G			2_F80CXA20_2.6805.6805.2
2	E7ERA1	Uncharacterized protein OS=Homo sapiens GN=FN1 PE=4 SV=1	9737	265981	524	399	146	131	16030	1	0	0	824.11	2469.32	3	2469.31	0	0	30.48	0.0058	K	STATISGLKPGVDYTITVYAVTGR	G			2_F80TXA20.6891.6891.3
2	E7ERA1	Uncharacterized protein OS=Homo sapiens GN=FN1 PE=4 SV=1	9737	265981	524	399	146	131	16031	1	0	0	824.11	2469.32	3	2469.31	0	0	34.96	0.0021	K	STATISGLKPGVDYTITVYAVTGR	G			m84cxa20.6560.6560.3
2	E7ERA1	Uncharacterized protein OS=Homo sapiens GN=FN1 PE=4 SV=1	9737	265981	524	399	146	131	16038	1	0	0	1237.15	2472.29	2	2472.29	0	1	72.65	5.3e-07	R	NLQPASEYTVSLVAIKGNQESPK	A			2_F80TXA20.5862.5862.2
2	E7ERA1	Uncharacterized protein OS=Homo sapiens GN=FN1 PE=4 SV=1	9737	265981	524	399	146	131	16039	1	0	0	1237.15	2472.29	2	2472.29	0	1	73.38	4.5e-07	R	NLQPASEYTVSLVAIKGNQESPK	A			F80TXA20.5783.5783.2
2	E7ERA1	Uncharacterized protein OS=Homo sapiens GN=FN1 PE=4 SV=1	9737	265981	524	399	146	131	16040	1	0	0	825.1	2472.29	3	2472.29	0	1	23.65	0.041	R	NLQPASEYTVSLVAIKGNQESPK	A			m84cxa20.5543.5543.3
2	E7ERA1	Uncharacterized protein OS=Homo sapiens GN=FN1 PE=4 SV=1	9737	265981	524	399	146	131	16041	1	0	0	825.1	2472.29	3	2472.29	0	1	14.87	0.31	R	NLQPASEYTVSLVAIKGNQESPK	A			2_F80TXB20.5711.5711.3
2	E7ERA1	Uncharacterized protein OS=Homo sapiens GN=FN1 PE=4 SV=1	9737	265981	524	399	146	131	16083	1	0	0	826.74	2477.2	3	2477.2	0	0	43.52	0.0005	R	TEIDKPSQMQVTDVQDNSISVK	W	Oxidation (M)	0.0000000010000000000000.0	2_F80TXB20.4033.4033.3
2	E7ERA1	Uncharacterized protein OS=Homo sapiens GN=FN1 PE=4 SV=1	9737	265981	524	399	146	131	16084	1	0	0	826.74	2477.2	3	2477.2	0	0	30.46	0.01	R	TEIDKPSQMQVTDVQDNSISVK	W	Oxidation (M)	0.0000000010000000000000.0	m84txb20.3519.3519.3
2	E7ERA1	Uncharacterized protein OS=Homo sapiens GN=FN1 PE=4 SV=1	9737	265981	524	399	146	131	16175	1	0	0	1247.56	2493.11	2	2493.11	0	0	69.98	4.3e-07	R	TNTNVNCPIECFMPLDVQADR	E			2_F80TXA20.7487.7487.2
2	E7ERA1	Uncharacterized protein OS=Homo sapiens GN=FN1 PE=4 SV=1	9737	265981	524	399	146	131	16176	1	0	0	1247.56	2493.11	2	2493.11	0	0	58.85	5.5e-06	R	TNTNVNCPIECFMPLDVQADR	E			2_F80CXA20_1.7407.7407.2
2	E7ERA1	Uncharacterized protein OS=Homo sapiens GN=FN1 PE=4 SV=1	9737	265981	524	399	146	131	16177	1	0	0	832.04	2493.11	3	2493.11	0	0	55.21	1.3e-05	R	TNTNVNCPIECFMPLDVQADR	E			F80CXA20_2.7372.7372.3
2	E7ERA1	Uncharacterized protein OS=Homo sapiens GN=FN1 PE=4 SV=1	9737	265981	524	399	146	131	16178	1	0	0	832.04	2493.11	3	2493.11	0	0	14.73	0.15	R	TNTNVNCPIECFMPLDVQADR	E			m84cxa20.7162.7162.3
2	E7ERA1	Uncharacterized protein OS=Homo sapiens GN=FN1 PE=4 SV=1	9737	265981	524	399	146	131	16184	1	0	0	499.67	2493.33	5	2493.33	0	1	19.58	0.075	K	DTLTSRPAQGVVTTLENVSPPRR	A			2_F80CXA20_1.5832.5832.5
2	E7ERA1	Uncharacterized protein OS=Homo sapiens GN=FN1 PE=4 SV=1	9737	265981	524	399	146	131	16185	1	0	0	499.67	2493.33	5	2493.33	0	1	12.33	0.4	K	DTLTSRPAQGVVTTLENVSPPRR	A			f69cxa20.5190.5190.5
2	E7ERA1	Uncharacterized protein OS=Homo sapiens GN=FN1 PE=4 SV=1	9737	265981	524	399	146	131	16186	1	0	0	832.12	2493.33	3	2493.33	0	1	17.67	0.12	K	DTLTSRPAQGVVTTLENVSPPRR	A			f69cxb20.5268.5268.3
2	E7ERA1	Uncharacterized protein OS=Homo sapiens GN=FN1 PE=4 SV=1	9737	265981	524	399	146	131	16187	1	0	0	832.12	2493.33	3	2493.33	0	1	18.78	0.091	K	DTLTSRPAQGVVTTLENVSPPRR	A			f69cxb20_100930171645.5236.5236.3
2	E7ERA1	Uncharacterized protein OS=Homo sapiens GN=FN1 PE=4 SV=1	9737	265981	524	399	146	131	16188	1	0	0	624.34	2493.33	4	2493.33	0	1	47.05	0.00014	K	DTLTSRPAQGVVTTLENVSPPRR	A			f69cxa20.5158.5158.4
2	E7ERA1	Uncharacterized protein OS=Homo sapiens GN=FN1 PE=4 SV=1	9737	265981	524	399	146	131	16189	1	0	0	624.34	2493.33	4	2493.33	0	1	30.89	0.0056	K	DTLTSRPAQGVVTTLENVSPPRR	A			m84cxa20.5559.5559.4
2	E7ERA1	Uncharacterized protein OS=Homo sapiens GN=FN1 PE=4 SV=1	9737	265981	524	399	146	131	16373	1	0	0	631.85	2523.36	4	2523.36	0	0	73.35	2.5e-07	R	DLEVVAATPTSLLISWDAPAVTVR	Y			F80CXA20_2.8622.8622.4
2	E7ERA1	Uncharacterized protein OS=Homo sapiens GN=FN1 PE=4 SV=1	9737	265981	524	399	146	131	16374	1	0	0	631.85	2523.36	4	2523.36	0	0	52.73	2.9e-05	R	DLEVVAATPTSLLISWDAPAVTVR	Y			f69txb20.7782.7782.4
2	E7ERA1	Uncharacterized protein OS=Homo sapiens GN=FN1 PE=4 SV=1	9737	265981	524	399	146	131	16375	1	0	0	842.13	2523.36	3	2523.36	0	0	32.42	0.0031	R	DLEVVAATPTSLLISWDAPAVTVR	Y			m84txb20.7953.7953.3
2	E7ERA1	Uncharacterized protein OS=Homo sapiens GN=FN1 PE=4 SV=1	9737	265981	524	399	146	131	16376	1	0	0	842.13	2523.36	3	2523.36	0	0	35.51	0.0015	R	DLEVVAATPTSLLISWDAPAVTVR	Y			f69cxa20_100930142853.8007.8007.3
2	E7ERA1	Uncharacterized protein OS=Homo sapiens GN=FN1 PE=4 SV=1	9737	265981	524	399	146	131	16377	1	0	0	1262.69	2523.36	2	2523.36	0	0	59.58	5.9e-06	R	DLEVVAATPTSLLISWDAPAVTVR	Y			m84txb20.7979.7979.2
2	E7ERA1	Uncharacterized protein OS=Homo sapiens GN=FN1 PE=4 SV=1	9737	265981	524	399	146	131	16378	1	0	0	1262.69	2523.36	2	2523.36	0	0	47.58	9.4e-05	R	DLEVVAATPTSLLISWDAPAVTVR	Y			m84txa20.7925.7925.2
2	E7ERA1	Uncharacterized protein OS=Homo sapiens GN=FN1 PE=4 SV=1	9737	265981	524	399	146	131	16408	1	0	0	1266.69	2531.36	2	2531.36	0	0	70.66	3.4e-07	R	NSITLTNLTPGTEYVVSIVALNGR	E			f69cxb20_100930171645.7618.7618.2
2	E7ERA1	Uncharacterized protein OS=Homo sapiens GN=FN1 PE=4 SV=1	9737	265981	524	399	146	131	16409	1	0	0	1266.69	2531.36	2	2531.36	0	0	78.66	5.4e-08	R	NSITLTNLTPGTEYVVSIVALNGR	E			f69txa20.7901.7901.2
2	E7ERA1	Uncharacterized protein OS=Homo sapiens GN=FN1 PE=4 SV=1	9737	265981	524	399	146	131	16410	1	0	0	844.79	2531.36	3	2531.36	0	0	49.74	4.6e-05	R	NSITLTNLTPGTEYVVSIVALNGR	E			f69txa20.7910.7910.3
2	E7ERA1	Uncharacterized protein OS=Homo sapiens GN=FN1 PE=4 SV=1	9737	265981	524	399	146	131	16411	1	0	0	844.79	2531.36	3	2531.36	0	0	38.97	0.00055	R	NSITLTNLTPGTEYVVSIVALNGR	E			f69cxb20_100930171645.7593.7593.3
2	E7ERA1	Uncharacterized protein OS=Homo sapiens GN=FN1 PE=4 SV=1	9737	265981	524	399	146	131	16655	1	0	0	643.84	2571.33	4	2571.33	0	1	31.66	0.0061	R	TKTETITGFQVDAVPANGQTPIQR	T			F80CXA20_2.5437.5437.4
2	E7ERA1	Uncharacterized protein OS=Homo sapiens GN=FN1 PE=4 SV=1	9737	265981	524	399	146	131	16656	1	0	0	643.84	2571.33	4	2571.33	0	1	39.61	0.00097	R	TKTETITGFQVDAVPANGQTPIQR	T			2_F80CXA20_2.5454.5454.4
2	E7ERA1	Uncharacterized protein OS=Homo sapiens GN=FN1 PE=4 SV=1	9737	265981	524	399	146	131	16657	1	0	0	1286.67	2571.33	2	2571.33	0	1	24.73	0.028	R	TKTETITGFQVDAVPANGQTPIQR	T			2_F80TXA20.5584.5584.2
2	E7ERA1	Uncharacterized protein OS=Homo sapiens GN=FN1 PE=4 SV=1	9737	265981	524	399	146	131	16658	1	0	0	1286.67	2571.33	2	2571.33	0	1	16.16	0.2	R	TKTETITGFQVDAVPANGQTPIQR	T			m84txb20.4919.4919.2
2	E7ERA1	Uncharacterized protein OS=Homo sapiens GN=FN1 PE=4 SV=1	9737	265981	524	399	146	131	16877	1	0	0	1310.56	2619.1	2	2619.1	0	0	62.74	7.7e-07	K	FGFCPMAAHEEICTTNEGVMYR	I			2_F80TXB20.6207.6207.2
2	E7ERA1	Uncharacterized protein OS=Homo sapiens GN=FN1 PE=4 SV=1	9737	265981	524	399	146	131	16878	1	0	0	1310.56	2619.1	2	2619.1	0	0	87.98	2.3e-09	K	FGFCPMAAHEEICTTNEGVMYR	I			F80TXA20.6243.6243.2
2	E7ERA1	Uncharacterized protein OS=Homo sapiens GN=FN1 PE=4 SV=1	9737	265981	524	399	146	131	16879	1	0	0	874.04	2619.1	3	2619.1	0	0	44.57	5.1e-05	K	FGFCPMAAHEEICTTNEGVMYR	I			f69txa20.5816.5816.3
2	E7ERA1	Uncharacterized protein OS=Homo sapiens GN=FN1 PE=4 SV=1	9737	265981	524	399	146	131	16880	1	0	0	874.04	2619.1	3	2619.1	0	0	56.87	3e-06	K	FGFCPMAAHEEICTTNEGVMYR	I			f69txb20.5476.5476.3
2	E7ERA1	Uncharacterized protein OS=Homo sapiens GN=FN1 PE=4 SV=1	9737	265981	524	399	146	131	16929	1	0	0	879.37	2635.1	3	2635.1	0	0	35.89	0.00036	K	FGFCPMAAHEEICTTNEGVMYR	I	Oxidation (M)	0.0000010000000000000000.0	2_F80CXA20_2.5789.5789.3
2	E7ERA1	Uncharacterized protein OS=Homo sapiens GN=FN1 PE=4 SV=1	9737	265981	524	399	146	131	16930	1	0	0	879.37	2635.1	3	2635.1	0	0	50.67	1.2e-05	K	FGFCPMAAHEEICTTNEGVMYR	I	Oxidation (M)	0.0000000000000000000100.0	2_F80CXA20_1.5911.5911.3
2	E7ERA1	Uncharacterized protein OS=Homo sapiens GN=FN1 PE=4 SV=1	9737	265981	524	399	146	131	16967	1	0	0	1325.64	2649.27	2	2649.27	0	1	24.42	0.035	R	YYRITYGETGGNSPVQEFTVPGSK	S			2_F80CXA20_1.5882.5882.2
2	E7ERA1	Uncharacterized protein OS=Homo sapiens GN=FN1 PE=4 SV=1	9737	265981	524	399	146	131	16968	1	0	0	884.1	2649.27	3	2649.27	0	1	24.14	0.037	R	YYRITYGETGGNSPVQEFTVPGSK	S			f69txb20.5130.5130.3
2	E7ERA1	Uncharacterized protein OS=Homo sapiens GN=FN1 PE=4 SV=1	9737	265981	524	399	146	131	16969	1	0	0	884.1	2649.27	3	2649.27	0	1	57.31	1.8e-05	R	YYRITYGETGGNSPVQEFTVPGSK	S			2_F80TXA20.5931.5931.3
2	E7ERA1	Uncharacterized protein OS=Homo sapiens GN=FN1 PE=4 SV=1	9737	265981	524	399	146	131	17095	1	0	0	672.56	2686.2	4	2686.19	0	1	13.39	0.19	R	VGDTYERPKDSMIWDCTCIGAGR	G			f69cxb20_100930171645.4990.4990.4
2	E7ERA1	Uncharacterized protein OS=Homo sapiens GN=FN1 PE=4 SV=1	9737	265981	524	399	146	131	17096	1	0	0	672.56	2686.2	4	2686.19	0	1	13.6	0.18	R	VGDTYERPKDSMIWDCTCIGAGR	G			f69txa20.4992.4992.4
2	E7ERA1	Uncharacterized protein OS=Homo sapiens GN=FN1 PE=4 SV=1	9737	265981	524	399	146	131	17097	1	0	0	1344.11	2686.2	2	2686.19	0.01	1	12.44	0.22	R	VGDTYERPKDSMIWDCTCIGAGR	G			F80TXB20.5427.5427.2
2	E7ERA1	Uncharacterized protein OS=Homo sapiens GN=FN1 PE=4 SV=1	9737	265981	524	399	146	131	17098	1	0	0	1344.11	2686.2	2	2686.19	0.01	1	22.64	0.021	R	VGDTYERPKDSMIWDCTCIGAGR	G			F80TXA20.5408.5408.2
2	E7ERA1	Uncharacterized protein OS=Homo sapiens GN=FN1 PE=4 SV=1	9737	265981	524	399	146	131	17110	1	0	0	673.85	2691.36	4	2691.37	0	0	43.76	0.00038	K	FTQVTPTSLSAQWTPPNVQLTGYR	V			F80TXB20.7200.7200.4
2	E7ERA1	Uncharacterized protein OS=Homo sapiens GN=FN1 PE=4 SV=1	9737	265981	524	399	146	131	17111	1	0	0	1346.69	2691.37	2	2691.37	0	0	43.83	0.00037	K	FTQVTPTSLSAQWTPPNVQLTGYR	V			2_F80TXA20.7247.7247.2
2	E7ERA1	Uncharacterized protein OS=Homo sapiens GN=FN1 PE=4 SV=1	9737	265981	524	399	146	131	17112	1	0	0	1346.69	2691.37	2	2691.37	0	0	70.54	7.8e-07	K	FTQVTPTSLSAQWTPPNVQLTGYR	V			f69txa20.6732.6732.2
2	E7ERA1	Uncharacterized protein OS=Homo sapiens GN=FN1 PE=4 SV=1	9737	265981	524	399	146	131	17113	1	0	0	898.13	2691.37	3	2691.37	0	0	5.85	2.3	K	FTQVTPTSLSAQWTPPNVQLTGYR	V			2_F80CXA20_1.6810.6810.3
2	E7ERA1	Uncharacterized protein OS=Homo sapiens GN=FN1 PE=4 SV=1	9737	265981	524	399	146	131	17114	1	0	0	898.13	2691.37	3	2691.37	0	0	43.38	0.00039	K	FTQVTPTSLSAQWTPPNVQLTGYR	V			2_F80TXA20.7246.7246.3
2	E7ERA1	Uncharacterized protein OS=Homo sapiens GN=FN1 PE=4 SV=1	9737	265981	524	399	146	131	17115	1	0	0	898.13	2691.37	3	2691.37	0	0	42.68	0.00046	K	FTQVTPTSLSAQWTPPNVQLTGYR	V			F80CXA20_2.7140.7140.3
2	E7ERA1	Uncharacterized protein OS=Homo sapiens GN=FN1 PE=4 SV=1	9737	265981	524	399	146	131	17141	1	0	0	901.74	2702.19	3	2702.19	0	1	28.82	0.0044	R	VGDTYERPKDSMIWDCTCIGAGR	G	Oxidation (M)	0.00000000000100000000000.0	f69txa20.4486.4486.3
2	E7ERA1	Uncharacterized protein OS=Homo sapiens GN=FN1 PE=4 SV=1	9737	265981	524	399	146	131	17142	1	0	0	901.74	2702.19	3	2702.19	0	1	33.22	0.0016	R	VGDTYERPKDSMIWDCTCIGAGR	G	Oxidation (M)	0.00000000000100000000000.0	f69cxa20.4261.4261.3
2	E7ERA1	Uncharacterized protein OS=Homo sapiens GN=FN1 PE=4 SV=1	9737	265981	524	399	146	131	17143	1	0	0	676.55	2702.19	4	2702.19	0	1	13.92	0.14	R	VGDTYERPKDSMIWDCTCIGAGR	G	Oxidation (M)	0.00000000000100000000000.0	2_F80CXA20_1.4877.4877.4
2	E7ERA1	Uncharacterized protein OS=Homo sapiens GN=FN1 PE=4 SV=1	9737	265981	524	399	146	131	17144	1	0	0	676.55	2702.19	4	2702.19	0	1	14.46	0.12	R	VGDTYERPKDSMIWDCTCIGAGR	G	Oxidation (M)	0.00000000000100000000000.0	2_F80CXA20_2.4874.4874.4
2	E7ERA1	Uncharacterized protein OS=Homo sapiens GN=FN1 PE=4 SV=1	9737	265981	524	399	146	131	17504	1	0	0	700.63	2798.48	4	2798.47	0	0	48.94	8.2e-05	K	GLKPGVVYEGQLISIQQYGHQEVTR	F			2_F80TXB20.5846.5846.4
2	E7ERA1	Uncharacterized protein OS=Homo sapiens GN=FN1 PE=4 SV=1	9737	265981	524	399	146	131	17505	1	0	0	700.63	2798.48	4	2798.47	0	0	60.36	5.9e-06	K	GLKPGVVYEGQLISIQQYGHQEVTR	F			F80TXB20.5907.5907.4
2	E7ERA1	Uncharacterized protein OS=Homo sapiens GN=FN1 PE=4 SV=1	9737	265981	524	399	146	131	17506	1	0	0	933.83	2798.48	3	2798.47	0	0	53.17	3.1e-05	K	GLKPGVVYEGQLISIQQYGHQEVTR	F			F80CXA20_2.5892.5892.3
2	E7ERA1	Uncharacterized protein OS=Homo sapiens GN=FN1 PE=4 SV=1	9737	265981	524	399	146	131	17507	1	0	0	933.83	2798.48	3	2798.47	0	0	66.13	1.5e-06	K	GLKPGVVYEGQLISIQQYGHQEVTR	F			F80TXB20.5912.5912.3
2	E7ERA1	Uncharacterized protein OS=Homo sapiens GN=FN1 PE=4 SV=1	9737	265981	524	399	146	131	17599	1	0	0	565.64	2823.17	5	2823.17	0	1	20.49	0.015	K	CDPHEATCYDDGKTYHVGEQWQK	E			m84cxa20.3486.3486.5
2	E7ERA1	Uncharacterized protein OS=Homo sapiens GN=FN1 PE=4 SV=1	9737	265981	524	399	146	131	17600	1	0	0	565.64	2823.17	5	2823.17	0	1	21.91	0.011	K	CDPHEATCYDDGKTYHVGEQWQK	E			F80CXA20_1.3672.3672.5
2	E7ERA1	Uncharacterized protein OS=Homo sapiens GN=FN1 PE=4 SV=1	9737	265981	524	399	146	131	17601	1	0	0	942.06	2823.17	3	2823.17	0	1	15.42	0.047	K	CDPHEATCYDDGKTYHVGEQWQK	E			2_F80CXA20_2.3669.3669.3
2	E7ERA1	Uncharacterized protein OS=Homo sapiens GN=FN1 PE=4 SV=1	9737	265981	524	399	146	131	17602	1	0	0	942.06	2823.17	3	2823.17	0	1	15.19	0.05	K	CDPHEATCYDDGKTYHVGEQWQK	E			2_F80TXA20.3707.3707.3
2	E7ERA1	Uncharacterized protein OS=Homo sapiens GN=FN1 PE=4 SV=1	9737	265981	524	399	146	131	17677	1	0	0	949.82	2846.44	3	2846.44	0	1	51.21	5.9e-05	R	NTFAEVTGLSPGVTYYFKVFAVSHGR	E			2_F80TXA20.8033.8033.3
2	E7ERA1	Uncharacterized protein OS=Homo sapiens GN=FN1 PE=4 SV=1	9737	265981	524	399	146	131	17679	1	0	0	712.62	2846.44	4	2846.44	0	1	27.4	0.014	R	NTFAEVTGLSPGVTYYFKVFAVSHGR	E			F80CXA20_1.7921.7921.4
2	E7ERA1	Uncharacterized protein OS=Homo sapiens GN=FN1 PE=4 SV=1	9737	265981	524	399	146	131	17680	1	0	0	712.62	2846.44	4	2846.44	0	1	1.89	5.1	R	NTFAEVTGLSPGVTYYFKVFAVSHGR	E			f69txa20.7683.7683.4
2	E7ERA1	Uncharacterized protein OS=Homo sapiens GN=FN1 PE=4 SV=1	9737	265981	524	399	146	131	17689	1	0	0	950.12	2847.34	3	2847.33	0.01	0	39.09	0.001	R	QAQQMVQPQSPVAVSQSKPGCYDNGK	H	Oxidation (M)	0.00001000000000000000000000.0	2_F80CXA20_1.3516.3516.3
2	E7ERA1	Uncharacterized protein OS=Homo sapiens GN=FN1 PE=4 SV=1	9737	265981	524	399	146	131	17690	1	0	0	950.12	2847.34	3	2847.33	0.01	0	49.69	8.8e-05	R	QAQQMVQPQSPVAVSQSKPGCYDNGK	H	Oxidation (M)	0.00001000000000000000000000.0	F80CXA20_2.3475.3475.3
2	E7ERA1	Uncharacterized protein OS=Homo sapiens GN=FN1 PE=4 SV=1	9737	265981	524	399	146	131	17750	1	0	0	1433.08	2864.14	2	2864.15	-0.02	0	40.64	8.6e-05	K	CDPVDQCQDSETGTFYQIGDSWEK	Y			f69txa20.6040.6040.2
2	E7ERA1	Uncharacterized protein OS=Homo sapiens GN=FN1 PE=4 SV=1	9737	265981	524	399	146	131	17751	1	0	0	1433.08	2864.14	2	2864.15	-0.02	0	71.3	7.4e-08	K	CDPVDQCQDSETGTFYQIGDSWEK	Y			F80TXB20.6470.6470.2
2	E7ERA1	Uncharacterized protein OS=Homo sapiens GN=FN1 PE=4 SV=1	9737	265981	524	399	146	131	17752	1	0	0	955.72	2864.15	3	2864.15	0	0	68.85	1.3e-07	K	CDPVDQCQDSETGTFYQIGDSWEK	Y			F80TXB20.6464.6464.3
2	E7ERA1	Uncharacterized protein OS=Homo sapiens GN=FN1 PE=4 SV=1	9737	265981	524	399	146	131	17753	1	0	0	955.72	2864.15	3	2864.15	0	0	29.37	0.0012	K	CDPVDQCQDSETGTFYQIGDSWEK	Y			f69cxb20.5886.5886.3
2	E7ERA1	Uncharacterized protein OS=Homo sapiens GN=FN1 PE=4 SV=1	9737	265981	524	399	146	131	17800	1	0	0	960.81	2879.41	3	2879.43	-0.03	1	47.29	0.0002	R	SYTITGLQPGTDYKIYLYTLNDNAR	S			2_F80CXA20_2.7140.7140.3
2	E7ERA1	Uncharacterized protein OS=Homo sapiens GN=FN1 PE=4 SV=1	9737	265981	524	399	146	131	17801	1	0	0	960.81	2879.41	3	2879.43	-0.03	1	64.22	4e-06	R	SYTITGLQPGTDYKIYLYTLNDNAR	S			F80TXB20.7138.7138.3
2	E7ERA1	Uncharacterized protein OS=Homo sapiens GN=FN1 PE=4 SV=1	9737	265981	524	399	146	131	17802	1	0	0	1440.72	2879.43	2	2879.43	0	1	34.99	0.003	R	SYTITGLQPGTDYKIYLYTLNDNAR	S			F80CXA20_1.7147.7147.2
2	E7ERA1	Uncharacterized protein OS=Homo sapiens GN=FN1 PE=4 SV=1	9737	265981	524	399	146	131	17803	1	0	0	1440.72	2879.43	2	2879.43	0	1	54.78	3.1e-05	R	SYTITGLQPGTDYKIYLYTLNDNAR	S			2_F80CXA20_2.7128.7128.2
2	E7ERA1	Uncharacterized protein OS=Homo sapiens GN=FN1 PE=4 SV=1	9737	265981	524	399	146	131	17892	1	0	0	968.41	2902.22	3	2902.22	0.01	1	54.26	6e-06	R	GFNCESKPEAEETCFDKYTGNTYR	V			F80CXA20_2.4435.4435.3
2	E7ERA1	Uncharacterized protein OS=Homo sapiens GN=FN1 PE=4 SV=1	9737	265981	524	399	146	131	17893	1	0	0	968.41	2902.22	3	2902.22	0.01	1	51.06	1.3e-05	R	GFNCESKPEAEETCFDKYTGNTYR	V			f69cxb20_100930171645.3978.3978.3
2	E7ERA1	Uncharacterized protein OS=Homo sapiens GN=FN1 PE=4 SV=1	9737	265981	524	399	146	131	17894	1	0	0	1452.12	2902.22	2	2902.22	0.01	1	33.91	0.00065	R	GFNCESKPEAEETCFDKYTGNTYR	V			f69cxa20.3883.3883.2
2	E7ERA1	Uncharacterized protein OS=Homo sapiens GN=FN1 PE=4 SV=1	9737	265981	524	399	146	131	17895	1	0	0	1452.12	2902.22	2	2902.22	0.01	1	45.3	4.7e-05	R	GFNCESKPEAEETCFDKYTGNTYR	V			F80CXA20_1.4499.4499.2
2	E7ERA1	Uncharacterized protein OS=Homo sapiens GN=FN1 PE=4 SV=1	9737	265981	524	399	146	131	17896	1	0	0	726.56	2902.22	4	2902.22	0.01	1	41.31	0.00012	R	GFNCESKPEAEETCFDKYTGNTYR	V			m84cxa20.4229.4229.4
2	E7ERA1	Uncharacterized protein OS=Homo sapiens GN=FN1 PE=4 SV=1	9737	265981	524	399	146	131	17897	1	0	0	726.56	2902.22	4	2902.22	0.01	1	22.74	0.0085	R	GFNCESKPEAEETCFDKYTGNTYR	V			F80CXA20_2.4434.4434.4
2	E7ERA1	Uncharacterized protein OS=Homo sapiens GN=FN1 PE=4 SV=1	9737	265981	524	399	146	131	18079	1	0	0	983.19	2946.53	3	2946.54	0	1	44.29	0.00023	K	FTQVTPTSLSAQWTPPNVQLTGYRVR	V			2_F80TXB20.6911.6911.3
2	E7ERA1	Uncharacterized protein OS=Homo sapiens GN=FN1 PE=4 SV=1	9737	265981	524	399	146	131	18080	1	0	0	983.19	2946.53	3	2946.54	0	1	56.17	1.5e-05	K	FTQVTPTSLSAQWTPPNVQLTGYRVR	V			F80TXA20.6960.6960.3
2	E7ERA1	Uncharacterized protein OS=Homo sapiens GN=FN1 PE=4 SV=1	9737	265981	524	399	146	131	18162	1	0	0	1484.78	2967.54	2	2967.54	0	0	47.95	0.00011	R	EVTSDSGSIVVSGLTPGVEYVYTIQVLR	D			2_F80TXA20.8328.8328.2
2	E7ERA1	Uncharacterized protein OS=Homo sapiens GN=FN1 PE=4 SV=1	9737	265981	524	399	146	131	18163	1	0	0	1484.78	2967.54	2	2967.54	0	0	78.85	8.6e-08	R	EVTSDSGSIVVSGLTPGVEYVYTIQVLR	D			F80TXB20.8299.8299.2
2	E7ERA1	Uncharacterized protein OS=Homo sapiens GN=FN1 PE=4 SV=1	9737	265981	524	399	146	131	18164	1	0	0	990.19	2967.55	3	2967.54	0	0	7.81	1.1	R	EVTSDSGSIVVSGLTPGVEYVYTIQVLR	D			m84cxb20.7268.7268.3
2	E7ERA1	Uncharacterized protein OS=Homo sapiens GN=FN1 PE=4 SV=1	9737	265981	524	399	146	131	18165	1	0	0	990.19	2967.55	3	2967.54	0	0	22.85	0.034	R	EVTSDSGSIVVSGLTPGVEYVYTIQVLR	D			f69txb20.7377.7377.3
2	E7ERA1	Uncharacterized protein OS=Homo sapiens GN=FN1 PE=4 SV=1	9737	265981	524	399	146	131	18275	1	0	0	1002.87	3005.59	3	3005.59	0	1	24.53	0.02	R	DLEVVAATPTSLLISWDAPAVTVRYYR	I			F80CXA20_1.8557.8557.3
2	E7ERA1	Uncharacterized protein OS=Homo sapiens GN=FN1 PE=4 SV=1	9737	265981	524	399	146	131	18276	1	0	0	1002.87	3005.59	3	3005.59	0	1	28.5	0.0078	R	DLEVVAATPTSLLISWDAPAVTVRYYR	I			F80CXA20_2.8473.8473.3
2	E7ERA1	Uncharacterized protein OS=Homo sapiens GN=FN1 PE=4 SV=1	9737	265981	524	399	146	131	18362	1	0	0	1521.8	3041.58	2	3041.58	0	0	23.83	0.02	K	VVTPLSPPTNLHLEANPDTGVLTVSWER	S			F80TXA20.7581.7581.2
2	E7ERA1	Uncharacterized protein OS=Homo sapiens GN=FN1 PE=4 SV=1	9737	265981	524	399	146	131	18363	1	0	0	1521.8	3041.58	2	3041.58	0	0	41.28	0.00036	K	VVTPLSPPTNLHLEANPDTGVLTVSWER	S			F80TXB20.7564.7564.2
2	E7ERA1	Uncharacterized protein OS=Homo sapiens GN=FN1 PE=4 SV=1	9737	265981	524	399	146	131	18364	1	0	0	1014.87	3041.59	3	3041.58	0	0	35.39	0.0013	K	VVTPLSPPTNLHLEANPDTGVLTVSWER	S			f69txa20.7188.7188.3
2	E7ERA1	Uncharacterized protein OS=Homo sapiens GN=FN1 PE=4 SV=1	9737	265981	524	399	146	131	18365	1	0	0	1014.87	3041.59	3	3041.58	0	0	21.32	0.032	K	VVTPLSPPTNLHLEANPDTGVLTVSWER	S			m84txb20.6880.6880.3
2	E7ERA1	Uncharacterized protein OS=Homo sapiens GN=FN1 PE=4 SV=1	9737	265981	524	399	146	131	18530	1	0	0	1034.44	3100.31	3	3100.31	0	1	35.89	0.00044	R	CDNCRRPGGEPSPEGTTGQSYNQYSQR	Y			F80TXA20.2792.2792.3
2	E7ERA1	Uncharacterized protein OS=Homo sapiens GN=FN1 PE=4 SV=1	9737	265981	524	399	146	131	18531	1	0	0	1034.44	3100.31	3	3100.31	0	1	25.95	0.0043	R	CDNCRRPGGEPSPEGTTGQSYNQYSQR	Y			F80TXB20.2791.2791.3
2	E7ERA1	Uncharacterized protein OS=Homo sapiens GN=FN1 PE=4 SV=1	9737	265981	524	399	146	131	18532	1	0	0	776.09	3100.31	4	3100.31	0	1	27.65	0.0029	R	CDNCRRPGGEPSPEGTTGQSYNQYSQR	Y			f69txb20.2341.2341.4
2	E7ERA1	Uncharacterized protein OS=Homo sapiens GN=FN1 PE=4 SV=1	9737	265981	524	399	146	131	18533	1	0	0	776.09	3100.31	4	3100.31	0	1	30.76	0.0014	R	CDNCRRPGGEPSPEGTTGQSYNQYSQR	Y			f69txa20.2516.2516.4
2	E7ERA1	Uncharacterized protein OS=Homo sapiens GN=FN1 PE=4 SV=1	9737	265981	524	399	146	131	18768	1	0	0	1057.23	3168.66	3	3168.66	0	1	21.76	0.033	K	EINLAPDSSSVVVSGLMVATKYEVSVYALK	D			2_F80CXA20_2.8642.8642.3
2	E7ERA1	Uncharacterized protein OS=Homo sapiens GN=FN1 PE=4 SV=1	9737	265981	524	399	146	131	18769	1	0	0	1057.23	3168.66	3	3168.66	0	1	12.22	0.3	K	EINLAPDSSSVVVSGLMVATKYEVSVYALK	D			m84cxa20.8460.8460.3
2	E7ERA1	Uncharacterized protein OS=Homo sapiens GN=FN1 PE=4 SV=1	9737	265981	524	399	146	131	18796	1	0	0	1060.45	3178.33	3	3178.33	0.01	1	47.94	3.5e-05	R	WKCDPVDQCQDSETGTFYQIGDSWEK	Y			m84txa20.5686.5686.3
2	E7ERA1	Uncharacterized protein OS=Homo sapiens GN=FN1 PE=4 SV=1	9737	265981	524	399	146	131	18797	1	0	0	1060.45	3178.33	3	3178.33	0.01	1	58.94	2.7e-06	R	WKCDPVDQCQDSETGTFYQIGDSWEK	Y			2_F80TXA20.6386.6386.3
2	E7ERA1	Uncharacterized protein OS=Homo sapiens GN=FN1 PE=4 SV=1	9737	265981	524	399	146	131	18822	1	0	0	1063.24	3186.69	3	3186.69	0	0	8.22	0.53	K	TDELPQLVTLPHPNLHGPEILDVPSTVQK	T			f69txa20.6954.6954.3
2	E7ERA1	Uncharacterized protein OS=Homo sapiens GN=FN1 PE=4 SV=1	9737	265981	524	399	146	131	18823	1	0	0	1063.24	3186.69	3	3186.69	0	0	20.48	0.031	K	TDELPQLVTLPHPNLHGPEILDVPSTVQK	T			F80TXA20.7381.7381.3
2	E7ERA1	Uncharacterized protein OS=Homo sapiens GN=FN1 PE=4 SV=1	9737	265981	524	399	146	131	18824	1	0	0	797.68	3186.69	4	3186.69	0	0	15.04	0.096	K	TDELPQLVTLPHPNLHGPEILDVPSTVQK	T			F80CXA20_1.7374.7374.4
2	E7ERA1	Uncharacterized protein OS=Homo sapiens GN=FN1 PE=4 SV=1	9737	265981	524	399	146	131	18825	1	0	0	797.68	3186.69	4	3186.69	0	0	24.33	0.011	K	TDELPQLVTLPHPNLHGPEILDVPSTVQK	T			2_F80CXA20_1.7353.7353.4
2	E7ERA1	Uncharacterized protein OS=Homo sapiens GN=FN1 PE=4 SV=1	9737	265981	524	399	146	131	19156	1	0	0	663.97	3314.79	5	3314.79	0	1	10.62	0.18	K	KTDELPQLVTLPHPNLHGPEILDVPSTVQK	T			F80CXA20_1.7015.7015.5
2	E7ERA1	Uncharacterized protein OS=Homo sapiens GN=FN1 PE=4 SV=1	9737	265981	524	399	146	131	19157	1	0	0	663.97	3314.79	5	3314.79	0	1	11.19	0.16	K	KTDELPQLVTLPHPNLHGPEILDVPSTVQK	T			2_F80TXB20.6974.6974.5
2	E7ERA1	Uncharacterized protein OS=Homo sapiens GN=FN1 PE=4 SV=1	9737	265981	524	399	146	131	19158	1	0	0	829.71	3314.8	4	3314.79	0.01	1	41.94	0.00011	K	KTDELPQLVTLPHPNLHGPEILDVPSTVQK	T			2_F80CXA20_1.7002.7002.4
2	E7ERA1	Uncharacterized protein OS=Homo sapiens GN=FN1 PE=4 SV=1	9737	265981	524	399	146	131	19159	1	0	0	829.71	3314.8	4	3314.79	0.01	1	35.11	0.00051	K	KTDELPQLVTLPHPNLHGPEILDVPSTVQK	T			f69cxa20.6322.6322.4
2	E7ERA1	Uncharacterized protein OS=Homo sapiens GN=FN1 PE=4 SV=1	9737	265981	524	399	146	131	19343	1	0	0	1130.93	3389.78	3	3389.78	-0.01	1	48.76	3.9e-05	K	YEVSVYALKDTLTSRPAQGVVTTLENVSPPR	R			F80TXB20.7418.7418.3
2	E7ERA1	Uncharacterized protein OS=Homo sapiens GN=FN1 PE=4 SV=1	9737	265981	524	399	146	131	19344	1	0	0	1130.93	3389.78	3	3389.78	-0.01	1	33.09	0.0014	K	YEVSVYALKDTLTSRPAQGVVTTLENVSPPR	R			F80CXA20_1.7405.7405.3
2	E7ERA1	Uncharacterized protein OS=Homo sapiens GN=FN1 PE=4 SV=1	9737	265981	524	399	146	131	19345	1	0	0	848.45	3389.78	4	3389.78	0	1	9.99	0.28	K	YEVSVYALKDTLTSRPAQGVVTTLENVSPPR	R			F80TXA20.7401.7401.4
2	E7ERA1	Uncharacterized protein OS=Homo sapiens GN=FN1 PE=4 SV=1	9737	265981	524	399	146	131	19346	1	0	0	848.45	3389.78	4	3389.78	0	1	18.84	0.037	K	YEVSVYALKDTLTSRPAQGVVTTLENVSPPR	R			2_F80CXA20_1.7372.7372.4
2	E7ERA1	Uncharacterized protein OS=Homo sapiens GN=FN1 PE=4 SV=1	9737	265981	524	399	146	131	19373	1	0	0	1133.81	3398.42	3	3398.42	0	1	39.21	0.00021	R	TFYSCTTEGRQDGHLWCSTTSNYEQDQK	Y			F80TXB20.4612.4612.3
2	E7ERA1	Uncharacterized protein OS=Homo sapiens GN=FN1 PE=4 SV=1	9737	265981	524	399	146	131	19374	1	0	0	1133.81	3398.42	3	3398.42	0	1	37.91	0.00028	R	TFYSCTTEGRQDGHLWCSTTSNYEQDQK	Y			f69txb20.3955.3955.3
2	E7ERA1	Uncharacterized protein OS=Homo sapiens GN=FN1 PE=4 SV=1	9737	265981	524	399	146	131	19375	1	0	0	850.61	3398.42	4	3398.42	0	1	10.55	0.16	R	TFYSCTTEGRQDGHLWCSTTSNYEQDQK	Y			f69txb20.3954.3954.4
2	E7ERA1	Uncharacterized protein OS=Homo sapiens GN=FN1 PE=4 SV=1	9737	265981	524	399	146	131	19376	1	0	0	850.61	3398.42	4	3398.42	0	1	17.41	0.033	R	TFYSCTTEGRQDGHLWCSTTSNYEQDQK	Y			m84cxa20.4401.4401.4
2	E7ERA1	Uncharacterized protein OS=Homo sapiens GN=FN1 PE=4 SV=1	9737	265981	524	399	146	131	19413	1	0	0	855.44	3417.75	4	3417.75	0	1	1.58	4.3	K	VTIMWTPPESAVTGYRVDVIPVNLPGEHGQR	L			2_F80TXB20.7465.7465.4
2	E7ERA1	Uncharacterized protein OS=Homo sapiens GN=FN1 PE=4 SV=1	9737	265981	524	399	146	131	19531	1	1	1	1152.94	3455.8	3	3455.79	0.01	0	3.15	2.1	K	ESVPISDTIIPEVPQLTDLSFVDITDSSIGLR	W			F80CXA20_2.9071.9071.3
2	E7ERA1	Uncharacterized protein OS=Homo sapiens GN=FN1 PE=4 SV=1	9737	265981	524	399	146	131	19532	1	1	1	1152.94	3455.8	3	3455.79	0.01	0	10.17	0.42	K	ESVPISDTIIPEVPQLTDLSFVDITDSSIGLR	W			2_F80CXA20_1.9090.9090.3
2	E7ERA1	Uncharacterized protein OS=Homo sapiens GN=FN1 PE=4 SV=1	9737	265981	524	399	146	131	19553	1	0	0	1157.3	3468.89	3	3468.89	0	0	33.01	0.0013	R	EVVPRPRPGVTEATITGLEPGTEYTIYVIALK	N			F80TXA20.7696.7696.3
2	E7ERA1	Uncharacterized protein OS=Homo sapiens GN=FN1 PE=4 SV=1	9737	265981	524	399	146	131	19554	1	0	0	1157.3	3468.89	3	3468.89	0	0	33.76	0.0011	R	EVVPRPRPGVTEATITGLEPGTEYTIYVIALK	N			2_F80TXA20.7761.7761.3
2	E7ERA1	Uncharacterized protein OS=Homo sapiens GN=FN1 PE=4 SV=1	9737	265981	524	399	146	131	19555	1	0	0	868.23	3468.89	4	3468.89	0	0	42.96	0.00013	R	EVVPRPRPGVTEATITGLEPGTEYTIYVIALK	N			F80TXB20.7704.7704.4
2	E7ERA1	Uncharacterized protein OS=Homo sapiens GN=FN1 PE=4 SV=1	9737	265981	524	399	146	131	19556	1	0	0	868.23	3468.89	4	3468.89	0	0	22.05	0.017	R	EVVPRPRPGVTEATITGLEPGTEYTIYVIALK	N			2_F80TXB20.7655.7655.4
2	E7ERA1	Uncharacterized protein OS=Homo sapiens GN=FN1 PE=4 SV=1	9737	265981	524	399	146	131	19577	1	0	0	870.16	3476.61	4	3476.61	0	1	43.46	0.00033	R	RPHETGGYMLECVCLGNGKGEWTCKPIAEK	C			F80CXA20_2.5264.5264.4
2	E7ERA1	Uncharacterized protein OS=Homo sapiens GN=FN1 PE=4 SV=1	9737	265981	524	399	146	131	19578	1	0	0	870.16	3476.61	4	3476.61	0	1	44.53	0.00026	R	RPHETGGYMLECVCLGNGKGEWTCKPIAEK	C			F80TXA20.5278.5278.4
2	E7ERA1	Uncharacterized protein OS=Homo sapiens GN=FN1 PE=4 SV=1	9737	265981	524	399	146	131	19579	1	0	0	696.33	3476.62	5	3476.61	0.01	1	17.25	0.14	R	RPHETGGYMLECVCLGNGKGEWTCKPIAEK	C			F80CXA20_1.5326.5326.5
2	E7ERA1	Uncharacterized protein OS=Homo sapiens GN=FN1 PE=4 SV=1	9737	265981	524	399	146	131	19580	1	0	0	696.33	3476.62	5	3476.61	0.01	1	10.82	0.61	R	RPHETGGYMLECVCLGNGKGEWTCKPIAEK	C			F80TXA20.5296.5296.5
2	E7ERA1	Uncharacterized protein OS=Homo sapiens GN=FN1 PE=4 SV=1	9737	265981	524	399	146	131	19786	1	0	0	1185.27	3552.79	3	3552.79	0	1	52.99	2.9e-05	R	EVTSDSGSIVVSGLTPGVEYVYTIQVLRDGQER	D			F80CXA20_2.7720.7720.3
2	E7ERA1	Uncharacterized protein OS=Homo sapiens GN=FN1 PE=4 SV=1	9737	265981	524	399	146	131	19787	1	0	0	1185.27	3552.79	3	3552.79	0	1	40.88	0.00047	R	EVTSDSGSIVVSGLTPGVEYVYTIQVLRDGQER	D			F80CXA20_1.7768.7768.3
2	E7ERA1	Uncharacterized protein OS=Homo sapiens GN=FN1 PE=4 SV=1	9737	265981	524	399	146	131	19788	1	0	0	1185.27	3552.8	3	3552.79	0	1	54.84	2e-05	R	EVTSDSGSIVVSGLTPGVEYVYTIQVLRDGQER	D			F80TXB20.7950.7950.3
2	E7ERA1	Uncharacterized protein OS=Homo sapiens GN=FN1 PE=4 SV=1	9737	265981	524	399	146	131	19789	1	0	0	1185.27	3552.8	3	3552.79	0	1	53.52	2.7e-05	R	EVTSDSGSIVVSGLTPGVEYVYTIQVLRDGQER	D			2_F80TXB20.7884.7884.3
2	E7ERA1	Uncharacterized protein OS=Homo sapiens GN=FN1 PE=4 SV=1	9737	265981	524	399	146	131	19792	1	0	0	889.21	3552.8	4	3552.79	0	1	25.4	0.017	R	EVTSDSGSIVVSGLTPGVEYVYTIQVLRDGQER	D			F80CXA20_1.7900.7900.4
2	E7ERA1	Uncharacterized protein OS=Homo sapiens GN=FN1 PE=4 SV=1	9737	265981	524	399	146	131	19793	1	0	0	889.21	3552.8	4	3552.79	0	1	11.66	0.4	R	EVTSDSGSIVVSGLTPGVEYVYTIQVLRDGQER	D			F80TXA20.7955.7955.4
2	E7ERA1	Uncharacterized protein OS=Homo sapiens GN=FN1 PE=4 SV=1	9737	265981	524	399	146	131	19848	1	0	0	1192.85	3575.53	3	3575.54	-0.01	1	37.09	0.00022	K	CDPVDQCQDSETGTFYQIGDSWEKYVHGVR	Y			F80TXB20.7330.7330.3
2	E7ERA1	Uncharacterized protein OS=Homo sapiens GN=FN1 PE=4 SV=1	9737	265981	524	399	146	131	19849	1	0	0	1192.85	3575.53	3	3575.54	-0.01	1	60.03	1.1e-06	K	CDPVDQCQDSETGTFYQIGDSWEKYVHGVR	Y			2_F80TXA20.7365.7365.3
2	E7ERA1	Uncharacterized protein OS=Homo sapiens GN=FN1 PE=4 SV=1	9737	265981	524	399	146	131	19850	1	0	0	894.89	3575.54	4	3575.54	0	1	58.53	1.8e-06	K	CDPVDQCQDSETGTFYQIGDSWEKYVHGVR	Y			f69txb20.6428.6428.4
2	E7ERA1	Uncharacterized protein OS=Homo sapiens GN=FN1 PE=4 SV=1	9737	265981	524	399	146	131	19851	1	0	0	894.89	3575.54	4	3575.54	0	1	47.4	2.4e-05	K	CDPVDQCQDSETGTFYQIGDSWEKYVHGVR	Y			m84txa20.6600.6600.4
2	E7ERA1	Uncharacterized protein OS=Homo sapiens GN=FN1 PE=4 SV=1	9737	265981	524	399	146	131	20002	1	0	0	1216.26	3645.76	3	3645.76	0	0	8.29	1.1	R	VEYELSEEGDEPQYLDLPSTATSVNIPDLLPGR	K			F80CXA20_1.8043.8043.3
2	E7ERA1	Uncharacterized protein OS=Homo sapiens GN=FN1 PE=4 SV=1	9737	265981	524	399	146	131	20200	1	0	0	1258.96	3773.86	3	3773.85	0	1	55.43	1.8e-05	R	VEYELSEEGDEPQYLDLPSTATSVNIPDLLPGRK	Y			2_F80TXA20.7781.7781.3
2	E7ERA1	Uncharacterized protein OS=Homo sapiens GN=FN1 PE=4 SV=1	9737	265981	524	399	146	131	20201	1	0	0	1258.96	3773.86	3	3773.85	0	1	66.35	1.5e-06	R	VEYELSEEGDEPQYLDLPSTATSVNIPDLLPGRK	Y			f69cxa20_100930142853.7031.7031.3
2	E7ERA1	Uncharacterized protein OS=Homo sapiens GN=FN1 PE=4 SV=1	9737	265981	524	399	146	131	20202	1	0	0	944.47	3773.86	4	3773.85	0.01	1	33.94	0.0024	R	VEYELSEEGDEPQYLDLPSTATSVNIPDLLPGRK	Y			F80TXB20.7730.7730.4
2	E7ERA1	Uncharacterized protein OS=Homo sapiens GN=FN1 PE=4 SV=1	9737	265981	524	399	146	131	20203	1	0	0	944.47	3773.86	4	3773.85	0.01	1	33.29	0.0028	R	VEYELSEEGDEPQYLDLPSTATSVNIPDLLPGRK	Y			F80CXA20_1.7707.7707.4
2	E7ERA1	Uncharacterized protein OS=Homo sapiens GN=FN1 PE=4 SV=1	9737	265981	524	399	146	131	20215	1	0	0	945.75	3778.99	4	3778.99	0	1	16.37	0.054	R	DAPIVNKVVTPLSPPTNLHLEANPDTGVLTVSWER	S			F80TXB20.7603.7603.4
2	E7ERA1	Uncharacterized protein OS=Homo sapiens GN=FN1 PE=4 SV=1	9737	265981	524	399	146	131	20216	1	0	0	945.75	3778.99	4	3778.99	0	1	22.62	0.013	R	DAPIVNKVVTPLSPPTNLHLEANPDTGVLTVSWER	S			f69cxb20.6942.6942.4
2	E7ERA1	Uncharacterized protein OS=Homo sapiens GN=FN1 PE=4 SV=1	9737	265981	524	399	146	131	20217	1	0	0	1260.67	3778.99	3	3778.99	0	1	48.07	3.7e-05	R	DAPIVNKVVTPLSPPTNLHLEANPDTGVLTVSWER	S			F80TXA20.7601.7601.3
2	E7ERA1	Uncharacterized protein OS=Homo sapiens GN=FN1 PE=4 SV=1	9737	265981	524	399	146	131	20218	1	0	0	1260.67	3778.99	3	3778.99	0	1	61.56	1.6e-06	R	DAPIVNKVVTPLSPPTNLHLEANPDTGVLTVSWER	S			F80TXB20.7590.7590.3
2	E7ERA1	Uncharacterized protein OS=Homo sapiens GN=FN1 PE=4 SV=1	9737	265981	524	399	146	131	20236	1	0	0	948.97	3791.87	4	3791.87	0	1	21.55	0.042	R	TEIDKPSQMQVTDVQDNSISVKWLPSSSPVTGYR	V			F80CXA20_2.6473.6473.4
2	E7ERA1	Uncharacterized protein OS=Homo sapiens GN=FN1 PE=4 SV=1	9737	265981	524	399	146	131	20237	1	0	0	948.97	3791.87	4	3791.87	0	1	21.42	0.044	R	TEIDKPSQMQVTDVQDNSISVKWLPSSSPVTGYR	V			2_F80CXA20_2.6504.6504.4
2	E7ERA1	Uncharacterized protein OS=Homo sapiens GN=FN1 PE=4 SV=1	9737	265981	524	399	146	131	20238	1	0	0	1264.97	3791.89	3	3791.87	0.03	1	15.94	0.12	R	TEIDKPSQMQVTDVQDNSISVKWLPSSSPVTGYR	V			2_F80CXA20_1.6521.6521.3
2	E7ERA1	Uncharacterized protein OS=Homo sapiens GN=FN1 PE=4 SV=1	9737	265981	524	399	146	131	20243	1	0	0	949.21	3792.82	4	3792.82	0	0	10.73	0.5	R	AAVYQPQPHPQPPPYGHCVTDSGVVYSVGMQWLK	T			2_F80TXB20.6952.6952.4
2	E7ERA1	Uncharacterized protein OS=Homo sapiens GN=FN1 PE=4 SV=1	9737	265981	524	399	146	131	20244	1	0	0	949.21	3792.82	4	3792.82	0	0	13.41	0.27	R	AAVYQPQPHPQPPPYGHCVTDSGVVYSVGMQWLK	T			f69cxb20.6403.6403.4
2	E7ERA1	Uncharacterized protein OS=Homo sapiens GN=FN1 PE=4 SV=1	9737	265981	524	399	146	131	20245	1	0	0	1265.28	3792.82	3	3792.82	0	0	25.56	0.016	R	AAVYQPQPHPQPPPYGHCVTDSGVVYSVGMQWLK	T			F80TXB20.7024.7024.3
2	E7ERA1	Uncharacterized protein OS=Homo sapiens GN=FN1 PE=4 SV=1	9737	265981	524	399	146	131	20246	1	0	0	1265.28	3792.82	3	3792.82	0	0	38.16	0.00087	R	AAVYQPQPHPQPPPYGHCVTDSGVVYSVGMQWLK	T			F80TXA20.6997.6997.3
2	E7ERA1	Uncharacterized protein OS=Homo sapiens GN=FN1 PE=4 SV=1	9737	265981	524	399	146	131	20266	1	0	0	953.21	3808.82	4	3808.81	0.01	0	6.21	1.3	R	AAVYQPQPHPQPPPYGHCVTDSGVVYSVGMQWLK	T	Oxidation (M)	0.0000000000000000000000000000010000.0	2_F80CXA20_2.6463.6463.4
2	E7ERA1	Uncharacterized protein OS=Homo sapiens GN=FN1 PE=4 SV=1	9737	265981	524	399	146	131	20267	1	0	0	953.21	3808.82	4	3808.81	0.01	0	12.07	0.34	R	AAVYQPQPHPQPPPYGHCVTDSGVVYSVGMQWLK	T	Oxidation (M)	0.0000000000000000000000000000010000.0	F80CXA20_2.6436.6436.4
2	E7ERA1	Uncharacterized protein OS=Homo sapiens GN=FN1 PE=4 SV=1	9737	265981	524	399	146	131	20391	1	0	0	976.94	3903.73	4	3903.72	0.01	1	5.62	0.51	R	QDGHLWCSTTSNYEQDQKYSFCTDHTVLVQTR	G			2_F80TXA20.5472.5472.4
2	E7ERA1	Uncharacterized protein OS=Homo sapiens GN=FN1 PE=4 SV=1	9737	265981	524	399	146	131	20392	1	0	0	976.94	3903.73	4	3903.72	0.01	1	19.3	0.022	R	QDGHLWCSTTSNYEQDQKYSFCTDHTVLVQTR	G			f69cxa20.4752.4752.4
2	E7ERA1	Uncharacterized protein OS=Homo sapiens GN=FN1 PE=4 SV=1	9737	265981	524	399	146	131	20445	1	0	0	989.29	3953.13	4	3953.13	0.01	1	58.74	2.2e-06	R	EVVPRPRPGVTEATITGLEPGTEYTIYVIALKNNQK	S			2_F80CXA20_1.7016.7016.4
2	E7ERA1	Uncharacterized protein OS=Homo sapiens GN=FN1 PE=4 SV=1	9737	265981	524	399	146	131	20446	1	0	0	989.29	3953.13	4	3953.13	0.01	1	80.04	1.6e-08	R	EVVPRPRPGVTEATITGLEPGTEYTIYVIALKNNQK	S			F80CXA20_1.7021.7021.4
2	E7ERA1	Uncharacterized protein OS=Homo sapiens GN=FN1 PE=4 SV=1	9737	265981	524	399	146	131	20447	1	0	0	791.64	3953.15	5	3953.13	0.02	1	12.77	0.077	R	EVVPRPRPGVTEATITGLEPGTEYTIYVIALKNNQK	S			F80CXA20_2.6997.6997.5
2	E7ERA1	Uncharacterized protein OS=Homo sapiens GN=FN1 PE=4 SV=1	9737	265981	524	399	146	131	20448	1	0	0	791.64	3953.15	5	3953.13	0.02	1	12.4	0.083	R	EVVPRPRPGVTEATITGLEPGTEYTIYVIALKNNQK	S			F80CXA20_1.7031.7031.5
2	E7ERA1	Uncharacterized protein OS=Homo sapiens GN=FN1 PE=4 SV=1	9737	265981	524	399	146	131	20558	1	0	0	1011.53	4042.09	4	4042.1	-0.01	1	25.77	0.013	K	STATISGLKPGVDYTITVYAVTGRGDSPASSKPISINYR	T			F80CXA20_1.6491.6491.4
2	E7ERA1	Uncharacterized protein OS=Homo sapiens GN=FN1 PE=4 SV=1	9737	265981	524	399	146	131	20559	1	0	0	1011.53	4042.09	4	4042.1	-0.01	1	20.87	0.04	K	STATISGLKPGVDYTITVYAVTGRGDSPASSKPISINYR	T			F80TXA20.6454.6454.4
2	E7ERA1	Uncharacterized protein OS=Homo sapiens GN=FN1 PE=4 SV=1	9737	265981	524	399	146	131	20560	1	0	0	809.43	4042.1	5	4042.1	0	1	3.07	2.4	K	STATISGLKPGVDYTITVYAVTGRGDSPASSKPISINYR	T			F80CXA20_2.6453.6453.5
2	E7ERA1	Uncharacterized protein OS=Homo sapiens GN=FN1 PE=4 SV=1	9737	265981	524	399	146	131	20561	1	0	0	809.43	4042.1	5	4042.1	0	1	13.69	0.21	K	STATISGLKPGVDYTITVYAVTGRGDSPASSKPISINYR	T			2_F80TXA20.6534.6534.5
2	E7ERA1	Uncharacterized protein OS=Homo sapiens GN=FN1 PE=4 SV=1	9737	265981	524	399	146	131	20696	1	0	0	1047.7	4186.75	4	4186.74	0.01	1	21.25	0.0075	K	WCGTTQNYDADQKFGFCPMAAHEEICTTNEGVMYR	I			2_F80CXA20_1.6184.6184.4
2	E7ERA1	Uncharacterized protein OS=Homo sapiens GN=FN1 PE=4 SV=1	9737	265981	524	399	146	131	20697	1	0	0	1047.7	4186.75	4	4186.74	0.01	1	14.1	0.039	K	WCGTTQNYDADQKFGFCPMAAHEEICTTNEGVMYR	I			F80CXA20_1.6192.6192.4
2	E7ERA1	Uncharacterized protein OS=Homo sapiens GN=FN1 PE=4 SV=1	9737	265981	524	399	146	131	20743	1	0	0	1061.2	4240.77	4	4240.78	-0.01	0	24.02	0.004	K	CFDHAAGTSYVVGETWEKPYQGWMMVDCTCLGEGSGR	I			F80CXA20_1.7208.7208.4
2	E7ERA1	Uncharacterized protein OS=Homo sapiens GN=FN1 PE=4 SV=1	9737	265981	524	399	146	131	20744	1	0	0	1061.2	4240.77	4	4240.78	-0.01	0	29.91	0.001	K	CFDHAAGTSYVVGETWEKPYQGWMMVDCTCLGEGSGR	I			F80CXA20_2.7161.7161.4
2	E7ERA1	Uncharacterized protein OS=Homo sapiens GN=FN1 PE=4 SV=1	9737	265981	524	399	146	131	20830	1	0	0	865.66	4323.28	5	4323.27	0.01	1	17.04	0.043	K	EATIPGHLNSYTIKGLKPGVVYEGQLISIQQYGHQEVTR	F			2_F80CXA20_1.6411.6411.5
2	E7ERA1	Uncharacterized protein OS=Homo sapiens GN=FN1 PE=4 SV=1	9737	265981	524	399	146	131	20831	1	0	0	865.66	4323.28	5	4323.27	0.01	1	20.68	0.019	K	EATIPGHLNSYTIKGLKPGVVYEGQLISIQQYGHQEVTR	F			2_F80CXA20_2.6382.6382.5
2	E7ERA1	Uncharacterized protein OS=Homo sapiens GN=FN1 PE=4 SV=1	9737	265981	524	399	146	131	20885	1	0	0	1472.32	4413.93	3	4413.92	0.01	0	40.33	9.3e-05	R	EEVVTVGNSVNEGLNQPTDDSCFDPYTVSHYAVGDEWER	M			F80TXA20.6849.6849.3
2	E7ERA1	Uncharacterized protein OS=Homo sapiens GN=FN1 PE=4 SV=1	9737	265981	524	399	146	131	20886	1	0	0	1472.32	4413.93	3	4413.92	0.01	0	16.69	0.021	R	EEVVTVGNSVNEGLNQPTDDSCFDPYTVSHYAVGDEWER	M			m84cxa20.6580.6580.3
2	E7ERA1	Uncharacterized protein OS=Homo sapiens GN=FN1 PE=4 SV=1	9737	265981	524	399	146	131	20887	1	0	0	1104.49	4413.93	4	4413.92	0.01	0	4.33	0.37	R	EEVVTVGNSVNEGLNQPTDDSCFDPYTVSHYAVGDEWER	M			f69txa20.6452.6452.4
2	E7ERA1	Uncharacterized protein OS=Homo sapiens GN=FN1 PE=4 SV=1	9737	265981	524	399	146	131	20888	1	0	0	1104.49	4413.93	4	4413.92	0.01	0	13.97	0.04	R	EEVVTVGNSVNEGLNQPTDDSCFDPYTVSHYAVGDEWER	M			f69txa20.6439.6439.4
2	E7ERA1	Uncharacterized protein OS=Homo sapiens GN=FN1 PE=4 SV=1	9737	265981	524	399	146	131	20910	1	0	0	1480.98	4439.93	3	4439.93	0	0	7.49	0.18	K	QMLCTCLGNGVSCQETAVTQTYGGNSNGEPCVLPFTYNGR	T			F80TXA20.7152.7152.3
2	E7ERA1	Uncharacterized protein OS=Homo sapiens GN=FN1 PE=4 SV=1	9737	265981	524	399	146	131	20912	1	0	0	1110.99	4439.93	4	4439.93	0	0	13.67	0.043	K	QMLCTCLGNGVSCQETAVTQTYGGNSNGEPCVLPFTYNGR	T			F80TXA20.7074.7074.4
2	E7ERA1	Uncharacterized protein OS=Homo sapiens GN=FN1 PE=4 SV=1	9737	265981	524	399	146	131	20913	1	0	0	1110.99	4439.93	4	4439.93	0	0	21.95	0.0064	K	QMLCTCLGNGVSCQETAVTQTYGGNSNGEPCVLPFTYNGR	T			2_F80CXA20_1.7076.7076.4
2	E7ERA1	Uncharacterized protein OS=Homo sapiens GN=FN1 PE=4 SV=1	9737	265981	524	399	146	131	20937	1	0	0	1487.46	4459.35	3	4459.35	0	1	8.68	0.14	R	EESPLLIGQQSTVSDVPRDLEVVAATPTSLLISWDAPAVTVR	Y			F80CXA20_2.9008.9008.3
2	E7ERA1	Uncharacterized protein OS=Homo sapiens GN=FN1 PE=4 SV=1	9737	265981	524	399	146	131	20938	1	0	0	1487.46	4459.35	3	4459.35	0	1	33.87	0.00041	R	EESPLLIGQQSTVSDVPRDLEVVAATPTSLLISWDAPAVTVR	Y			F80TXA20.9143.9143.3
2	E7ERA1	Uncharacterized protein OS=Homo sapiens GN=FN1 PE=4 SV=1	9737	265981	524	399	146	131	20939	1	0	0	1115.84	4459.35	4	4459.35	0	1	9.94	0.1	R	EESPLLIGQQSTVSDVPRDLEVVAATPTSLLISWDAPAVTVR	Y			F80TXB20.9135.9135.4
2	E7ERA1	Uncharacterized protein OS=Homo sapiens GN=FN1 PE=4 SV=1	9737	265981	524	399	146	131	20940	1	0	0	1115.84	4459.35	4	4459.35	0	1	8.85	0.13	R	EESPLLIGQQSTVSDVPRDLEVVAATPTSLLISWDAPAVTVR	Y			f69cxb20.8428.8428.4
2	E7ERA1	Uncharacterized protein OS=Homo sapiens GN=FN1 PE=4 SV=1	9737	265981	524	399	146	131	20951	1	0	0	1490.12	4467.35	3	4467.35	0	1	7.8	0.29	R	NSITLTNLTPGTEYVVSIVALNGREESPLLIGQQSTVSDVPR	D			2_F80CXA20_2.8408.8408.3
2	E7ERA1	Uncharacterized protein OS=Homo sapiens GN=FN1 PE=4 SV=1	9737	265981	524	399	146	131	20952	1	0	0	1490.12	4467.35	3	4467.35	0	1	20.37	0.016	R	NSITLTNLTPGTEYVVSIVALNGREESPLLIGQQSTVSDVPR	D			f69txa20.8116.8116.3
2	E7ERA1	Uncharacterized protein OS=Homo sapiens GN=FN1 PE=4 SV=1	9737	265981	524	399	146	131	20953	1	0	0	1117.85	4467.35	4	4467.35	0	1	23.09	0.0086	R	NSITLTNLTPGTEYVVSIVALNGREESPLLIGQQSTVSDVPR	D			f69txa20.8111.8111.4
2	E7ERA1	Uncharacterized protein OS=Homo sapiens GN=FN1 PE=4 SV=1	9737	265981	524	399	146	131	20954	1	0	0	1117.85	4467.35	4	4467.35	0	1	10.49	0.16	R	NSITLTNLTPGTEYVVSIVALNGREESPLLIGQQSTVSDVPR	D			f69cxb20.7780.7780.4
2	E7ERA1	Uncharacterized protein OS=Homo sapiens GN=FN1 PE=4 SV=1	9737	265981	524	399	146	131	21117	1	0	0	1168.28	4669.09	4	4669.09	0	1	18.21	0.035	K	VREEVVTVGNSVNEGLNQPTDDSCFDPYTVSHYAVGDEWER	M			2_F80TXB20.6551.6551.4
2	E7ERA1	Uncharacterized protein OS=Homo sapiens GN=FN1 PE=4 SV=1	9737	265981	524	399	146	131	21118	1	0	0	1168.28	4669.09	4	4669.09	0	1	33.57	0.001	K	VREEVVTVGNSVNEGLNQPTDDSCFDPYTVSHYAVGDEWER	M			2_F80CXA20_1.6630.6630.4
2	E7ERA1	Uncharacterized protein OS=Homo sapiens GN=FN1 PE=4 SV=1	9737	265981	524	399	146	131	21406	1	0	0	1032.51	5157.5	5	5157.55	-0.04	0	22.83	0.017	K	TAGPDQTEMTIEGLQPTVEYVVSVYAQNPSGESQPLVQTAVTNIDRPK	G			2_F80TXA20.8446.8446.5
2	E7ERA1	Uncharacterized protein OS=Homo sapiens GN=FN1 PE=4 SV=1	9737	265981	524	399	146	131	21407	1	0	0	1032.51	5157.5	5	5157.55	-0.04	0	12.73	0.18	K	TAGPDQTEMTIEGLQPTVEYVVSVYAQNPSGESQPLVQTAVTNIDRPK	G			F80CXA20_2.8282.8282.5
2	E7ERA1	Uncharacterized protein OS=Homo sapiens GN=FN1 PE=4 SV=1	9737	265981	524	399	146	131	21408	1	0	0	1290.39	5157.54	4	5157.55	0	0	47.42	5.8e-05	K	TAGPDQTEMTIEGLQPTVEYVVSVYAQNPSGESQPLVQTAVTNIDRPK	G			F80CXA20_1.8355.8355.4
2	E7ERA1	Uncharacterized protein OS=Homo sapiens GN=FN1 PE=4 SV=1	9737	265981	524	399	146	131	21409	1	0	0	1290.39	5157.54	4	5157.55	0	0	53.84	1.3e-05	K	TAGPDQTEMTIEGLQPTVEYVVSVYAQNPSGESQPLVQTAVTNIDRPK	G			F80TXA20.8410.8410.4
2	E7ERA1	Uncharacterized protein OS=Homo sapiens GN=FN1 PE=4 SV=1	9737	265981	524	399	146	131	21536	1	0	0	1070.91	5349.51	5	5349.56	-0.05	0	8.43	0.35	R	GIGEWHCQPLQTYPSSSGPVEVFITETPSQPNSHPIQWNAPQPSHISK	Y			F80CXA20_2.6882.6882.5
2	E7ERA1	Uncharacterized protein OS=Homo sapiens GN=FN1 PE=4 SV=1	9737	265981	524	399	146	131	21537	1	0	0	1070.91	5349.51	5	5349.56	-0.05	0	8.89	0.32	R	GIGEWHCQPLQTYPSSSGPVEVFITETPSQPNSHPIQWNAPQPSHISK	Y			2_F80CXA20_1.6902.6902.5
3	F8W7G7	Uncharacterized protein OS=Homo sapiens GN=FN1 PE=4 SV=1	9649	246447	521	400	146	134	522	5	0	0	403.71	805.4	2	805.4	0	0	1.62	13	R	IGDTWSK	K			2_F80CXA20_1.9734.9734.2
3	F8W7G7	Uncharacterized protein OS=Homo sapiens GN=FN1 PE=4 SV=1	9649	246447	521	400	146	134	523	1	0	0	403.71	805.4	2	805.4	0	0	10.91	1.5	R	IGDTWSK	K			f69txa20.9558.9558.2
3	F8W7G7	Uncharacterized protein OS=Homo sapiens GN=FN1 PE=4 SV=1	9649	246447	521	400	146	134	524	2	0	0	403.71	805.4	2	805.4	0	0	3.72	7.8	R	IGDTWSK	K			f69cxa20.8577.8577.2
3	F8W7G7	Uncharacterized protein OS=Homo sapiens GN=FN1 PE=4 SV=1	9649	246447	521	400	146	134	525	1	0	0	403.71	805.4	2	805.4	0	0	6.57	4.1	R	IGDTWSK	K			f69cxa20_100930142853.8726.8726.2
3	F8W7G7	Uncharacterized protein OS=Homo sapiens GN=FN1 PE=4 SV=1	9649	246447	521	400	146	134	526	2	0	0	403.71	805.4	2	805.4	0	0	2.17	11	R	IGDTWSK	K			2_F80TXA20.99.99.2
3	F8W7G7	Uncharacterized protein OS=Homo sapiens GN=FN1 PE=4 SV=1	9649	246447	521	400	146	134	527	2	0	0	403.71	805.4	2	805.4	0	0	0.98	15	R	IGDTWSK	K			2_F80CXA20_2.98.98.2
3	F8W7G7	Uncharacterized protein OS=Homo sapiens GN=FN1 PE=4 SV=1	9649	246447	521	400	146	134	528	1	0	0	403.71	805.4	2	805.4	0	0	11.89	1.3	R	IGDTWSK	K			f69cxb20_100930171645.8903.8903.2
3	F8W7G7	Uncharacterized protein OS=Homo sapiens GN=FN1 PE=4 SV=1	9649	246447	521	400	146	134	529	1	0	0	403.71	805.4	2	805.4	0	0	11.84	1.3	R	IGDTWSK	K			f69cxa20.8762.8762.2
3	F8W7G7	Uncharacterized protein OS=Homo sapiens GN=FN1 PE=4 SV=1	9649	246447	521	400	146	134	530	1	0	0	403.71	805.4	2	805.4	0	0	46.43	0.00045	R	IGDTWSK	K			F80CXA20_2.3146.3146.2
3	F8W7G7	Uncharacterized protein OS=Homo sapiens GN=FN1 PE=4 SV=1	9649	246447	521	400	146	134	531	1	0	0	403.71	805.4	2	805.4	0	0	40.09	0.0019	R	IGDTWSK	K			2_F80CXA20_2.3181.3181.2
3	F8W7G7	Uncharacterized protein OS=Homo sapiens GN=FN1 PE=4 SV=1	9649	246447	521	400	146	134	543	1	0	0	404.25	806.49	2	806.49	0	0	35.6	0.00067	R	ITGYIIK	Y			F80TXA20.4448.4448.2
3	F8W7G7	Uncharacterized protein OS=Homo sapiens GN=FN1 PE=4 SV=1	9649	246447	521	400	146	134	544	1	0	0	404.25	806.49	2	806.49	0	0	27.12	0.0048	R	ITGYIIK	Y			F80CXA20_2.4448.4448.2
3	F8W7G7	Uncharacterized protein OS=Homo sapiens GN=FN1 PE=4 SV=1	9649	246447	521	400	146	134	549	1	0	0	404.72	807.42	2	807.42	0	0	28.59	0.025	R	AQITGYR	L			F80CXA20_1.2689.2689.2
3	F8W7G7	Uncharacterized protein OS=Homo sapiens GN=FN1 PE=4 SV=1	9649	246447	521	400	146	134	550	1	0	0	404.72	807.42	2	807.42	0	0	28.69	0.025	R	AQITGYR	L			2_F80CXA20_2.2693.2693.2
3	F8W7G7	Uncharacterized protein OS=Homo sapiens GN=FN1 PE=4 SV=1	9649	246447	521	400	146	134	690	1	0	0	414.75	827.49	2	827.49	0	0	29.27	0.013	R	TIKPDVR	S			f69cxb20.1987.1987.2
3	F8W7G7	Uncharacterized protein OS=Homo sapiens GN=FN1 PE=4 SV=1	9649	246447	521	400	146	134	691	1	0	0	414.75	827.49	2	827.49	0	0	26.65	0.025	R	TIKPDVR	S			f69txb20.1843.1843.2
3	F8W7G7	Uncharacterized protein OS=Homo sapiens GN=FN1 PE=4 SV=1	9649	246447	521	400	146	134	918	1	0	0	429.72	857.42	2	857.42	0	0	35.35	0.0038	R	SDTVPSPR	D			f69txa20.2138.2138.2
3	F8W7G7	Uncharacterized protein OS=Homo sapiens GN=FN1 PE=4 SV=1	9649	246447	521	400	146	134	919	1	0	0	429.72	857.42	2	857.42	0	0	38.18	0.002	R	SDTVPSPR	D			f69cxb20.2153.2153.2
3	F8W7G7	Uncharacterized protein OS=Homo sapiens GN=FN1 PE=4 SV=1	9649	246447	521	400	146	134	1024	1	0	0	436.74	871.47	2	871.47	0	0	41.73	0.00087	K	VFAVSHGR	E			2_F80CXA20_1.2519.2519.2
3	F8W7G7	Uncharacterized protein OS=Homo sapiens GN=FN1 PE=4 SV=1	9649	246447	521	400	146	134	1025	1	0	0	436.74	871.47	2	871.47	0	0	51.74	8.7e-05	K	VFAVSHGR	E			F80CXA20_1.2520.2520.2
3	F8W7G7	Uncharacterized protein OS=Homo sapiens GN=FN1 PE=4 SV=1	9649	246447	521	400	146	134	1042	1	0	0	437.71	873.4	2	873.4	0	0	10.28	0.62	K	YTGNTYR	V			f69cxa20.1538.1538.2
3	F8W7G7	Uncharacterized protein OS=Homo sapiens GN=FN1 PE=4 SV=1	9649	246447	521	400	146	134	1043	1	0	0	437.71	873.4	2	873.4	0	0	7.09	1.3	K	YTGNTYR	V			2_F80TXB20.1812.1812.2
3	F8W7G7	Uncharacterized protein OS=Homo sapiens GN=FN1 PE=4 SV=1	9649	246447	521	400	146	134	1200	1	0	0	450.27	898.52	2	898.52	0	1	23.8	0.045	K	SEPLIGRK	K			2_F80TXA20.2694.2694.2
3	F8W7G7	Uncharacterized protein OS=Homo sapiens GN=FN1 PE=4 SV=1	9649	246447	521	400	146	134	1201	1	0	0	450.27	898.52	2	898.52	0	1	19.77	0.11	K	SEPLIGRK	K			m84cxa20.2538.2538.2
3	F8W7G7	Uncharacterized protein OS=Homo sapiens GN=FN1 PE=4 SV=1	9649	246447	521	400	146	134	1234	1	0	0	452.24	902.46	2	902.46	0	1	42.39	0.00084	K	IGEKWDR	Q			f69cxb20_100930171645.2450.2450.2
3	F8W7G7	Uncharacterized protein OS=Homo sapiens GN=FN1 PE=4 SV=1	9649	246447	521	400	146	134	1235	1	0	0	452.24	902.46	2	902.46	0	1	35.05	0.0045	K	IGEKWDR	Q			m84cxb20.2302.2302.2
3	F8W7G7	Uncharacterized protein OS=Homo sapiens GN=FN1 PE=4 SV=1	9649	246447	521	400	146	134	1307	3	0	0	458.29	914.57	2	914.57	0	1	8.01	0.55	R	LTVGLTRR	G			2_F80TXB20.3360.3360.2
3	F8W7G7	Uncharacterized protein OS=Homo sapiens GN=FN1 PE=4 SV=1	9649	246447	521	400	146	134	1308	2	0	0	458.29	914.57	2	914.57	0	1	8.53	0.48	R	LTVGLTRR	G			F80CXA20_2.3417.3417.2
3	F8W7G7	Uncharacterized protein OS=Homo sapiens GN=FN1 PE=4 SV=1	9649	246447	521	400	146	134	1309	3	0	0	458.29	914.57	2	914.57	0	1	6.85	0.48	R	LTVGLTRR	G			2_F80TXA20.3672.3672.2
3	F8W7G7	Uncharacterized protein OS=Homo sapiens GN=FN1 PE=4 SV=1	9649	246447	521	400	146	134	1363	1	0	0	462.2	922.38	2	922.37	0	0	18.87	0.037	R	CTCVGNGR	G			m84cxa20.1442.1442.2
3	F8W7G7	Uncharacterized protein OS=Homo sapiens GN=FN1 PE=4 SV=1	9649	246447	521	400	146	134	1449	1	0	0	467.74	933.47	2	933.47	0	0	58.6	3.3e-05	R	ISCTIANR	C			2_F80CXA20_2.2673.2673.2
3	F8W7G7	Uncharacterized protein OS=Homo sapiens GN=FN1 PE=4 SV=1	9649	246447	521	400	146	134	1450	1	0	0	467.74	933.47	2	933.47	0	0	50.5	0.00021	R	ISCTIANR	C			m84cxa20.2532.2532.2
3	F8W7G7	Uncharacterized protein OS=Homo sapiens GN=FN1 PE=4 SV=1	9649	246447	521	400	146	134	1953	1	0	0	498.25	994.49	2	994.49	0	1	21.98	0.087	R	EDRVPHSR	N			f69cxb20_100930171645.1337.1337.2
3	F8W7G7	Uncharacterized protein OS=Homo sapiens GN=FN1 PE=4 SV=1	9649	246447	521	400	146	134	1954	1	0	0	498.25	994.49	2	994.49	0	1	17.61	0.24	R	EDRVPHSR	N			m84cxa20.1353.1353.2
3	F8W7G7	Uncharacterized protein OS=Homo sapiens GN=FN1 PE=4 SV=1	9649	246447	521	400	146	134	2251	1	0	0	515.77	1029.53	2	1029.52	0	0	28.21	0.036	K	YEKPGSPPR	E			F80TXA20.1766.1766.2
3	F8W7G7	Uncharacterized protein OS=Homo sapiens GN=FN1 PE=4 SV=1	9649	246447	521	400	146	134	2252	1	0	0	515.77	1029.53	2	1029.52	0	0	31.58	0.016	K	YEKPGSPPR	E			m84cxb20.1539.1539.2
3	F8W7G7	Uncharacterized protein OS=Homo sapiens GN=FN1 PE=4 SV=1	9649	246447	521	400	146	134	2537	1	0	0	532.77	1063.53	2	1063.53	0	0	38.71	0.0023	R	VGDTYERPK	D			f69cxb20_100930171645.1826.1826.2
3	F8W7G7	Uncharacterized protein OS=Homo sapiens GN=FN1 PE=4 SV=1	9649	246447	521	400	146	134	2538	1	0	0	532.77	1063.53	2	1063.53	0	0	44.48	0.00061	R	VGDTYERPK	D			2_F80CXA20_1.1936.1936.2
3	F8W7G7	Uncharacterized protein OS=Homo sapiens GN=FN1 PE=4 SV=1	9649	246447	521	400	146	134	2543	1	0	0	533.22	1064.43	2	1064.43	0	0	42	0.00019	R	CHEGGQSYK	I			f69cxb20_100930171645.1260.1260.2
3	F8W7G7	Uncharacterized protein OS=Homo sapiens GN=FN1 PE=4 SV=1	9649	246447	521	400	146	134	2544	1	0	0	533.22	1064.43	2	1064.43	0	0	26.09	0.0074	R	CHEGGQSYK	I			F80TXA20.1113.1113.2
3	F8W7G7	Uncharacterized protein OS=Homo sapiens GN=FN1 PE=4 SV=1	9649	246447	521	400	146	134	2601	1	0	0	536.29	1070.57	2	1070.56	0	0	30.48	0.014	K	YEVSVYALK	D			f69txb20.4653.4653.2
3	F8W7G7	Uncharacterized protein OS=Homo sapiens GN=FN1 PE=4 SV=1	9649	246447	521	400	146	134	2602	1	0	0	536.29	1070.57	2	1070.56	0	0	34.25	0.0058	K	YEVSVYALK	D			m84txb20.4695.4695.2
3	F8W7G7	Uncharacterized protein OS=Homo sapiens GN=FN1 PE=4 SV=1	9649	246447	521	400	146	134	2672	1	0	0	539.78	1077.54	2	1077.55	0	0	38.66	0.0032	R	QYNVGPSVSK	Y			2_F80CXA20_1.3008.3008.2
3	F8W7G7	Uncharacterized protein OS=Homo sapiens GN=FN1 PE=4 SV=1	9649	246447	521	400	146	134	2673	1	0	0	539.78	1077.54	2	1077.55	0	0	28.52	0.033	R	QYNVGPSVSK	Y			F80CXA20_1.3011.3011.2
3	F8W7G7	Uncharacterized protein OS=Homo sapiens GN=FN1 PE=4 SV=1	9649	246447	521	400	146	134	2958	1	0	0	555.77	1109.54	2	1109.54	0	0	32.61	0.006	R	STTPDITGYR	I			f69cxb20_100930171645.3447.3447.2
3	F8W7G7	Uncharacterized protein OS=Homo sapiens GN=FN1 PE=4 SV=1	9649	246447	521	400	146	134	2959	1	0	0	555.77	1109.54	2	1109.54	0	0	39.45	0.0012	R	STTPDITGYR	I			m84txa20.3405.3405.2
3	F8W7G7	Uncharacterized protein OS=Homo sapiens GN=FN1 PE=4 SV=1	9649	246447	521	400	146	134	3076	1	0	0	562.23	1122.45	2	1122.44	0	1	14.34	0.048	R	GWRCDNCR	R			2_F80CXA20_1.2003.2003.2
3	F8W7G7	Uncharacterized protein OS=Homo sapiens GN=FN1 PE=4 SV=1	9649	246447	521	400	146	134	3077	1	0	0	562.23	1122.45	2	1122.44	0	1	18.07	0.02	R	GWRCDNCR	R			F80CXA20_1.1963.1963.2
3	F8W7G7	Uncharacterized protein OS=Homo sapiens GN=FN1 PE=4 SV=1	9649	246447	521	400	146	134	3255	1	0	0	571.74	1141.46	2	1141.46	0	0	18.61	0.026	K	QHDMGHMMR	C			2_F80TXA20.2307.2307.2
3	F8W7G7	Uncharacterized protein OS=Homo sapiens GN=FN1 PE=4 SV=1	9649	246447	521	400	146	134	3256	1	0	0	571.74	1141.46	2	1141.46	0	0	19.16	0.023	K	QHDMGHMMR	C			f69cxb20.2074.2074.2
3	F8W7G7	Uncharacterized protein OS=Homo sapiens GN=FN1 PE=4 SV=1	9649	246447	521	400	146	134	3302	1	0	0	574.3	1146.59	2	1146.59	0	1	36.19	0.0053	R	GRISCTIANR	C			2_F80TXA20.2622.2622.2
3	F8W7G7	Uncharacterized protein OS=Homo sapiens GN=FN1 PE=4 SV=1	9649	246447	521	400	146	134	3303	1	0	0	574.3	1146.59	2	1146.59	0	1	28.66	0.03	R	GRISCTIANR	C			f69cxb20.2317.2317.2
3	F8W7G7	Uncharacterized protein OS=Homo sapiens GN=FN1 PE=4 SV=1	9649	246447	521	400	146	134	3489	1	0	0	585.23	1168.44	2	1168.44	0	0	36.91	0.00031	R	YQCYCYGR	G			f69cxa20.2498.2498.2
3	F8W7G7	Uncharacterized protein OS=Homo sapiens GN=FN1 PE=4 SV=1	9649	246447	521	400	146	134	3490	1	0	0	585.23	1168.44	2	1168.44	0	0	34.4	0.00054	R	YQCYCYGR	G			2_F80TXA20.3033.3033.2
3	F8W7G7	Uncharacterized protein OS=Homo sapiens GN=FN1 PE=4 SV=1	9649	246447	521	400	146	134	4072	1	0	0	611.26	1220.51	2	1220.51	0	0	63.42	1.5e-06	R	TFYSCTTEGR	Q			F80TXB20.3251.3251.2
3	F8W7G7	Uncharacterized protein OS=Homo sapiens GN=FN1 PE=4 SV=1	9649	246447	521	400	146	134	4073	1	0	0	611.26	1220.51	2	1220.51	0	0	47.6	5.8e-05	R	TFYSCTTEGR	Q			F80CXA20_2.3252.3252.2
3	F8W7G7	Uncharacterized protein OS=Homo sapiens GN=FN1 PE=4 SV=1	9649	246447	521	400	146	134	4466	1	0	0	419.23	1254.67	3	1254.67	0	1	33.8	0.0054	K	NNQKSEPLIGR	K			F80CXA20_2.2881.2881.3
3	F8W7G7	Uncharacterized protein OS=Homo sapiens GN=FN1 PE=4 SV=1	9649	246447	521	400	146	134	4467	1	0	0	419.23	1254.67	3	1254.67	0	1	27.81	0.022	K	NNQKSEPLIGR	K			2_F80TXA20.2955.2955.3
3	F8W7G7	Uncharacterized protein OS=Homo sapiens GN=FN1 PE=4 SV=1	9649	246447	521	400	146	134	4468	1	0	0	628.34	1254.67	2	1254.67	0	1	43.2	0.00065	K	NNQKSEPLIGR	K			f69cxb20.2597.2597.2
3	F8W7G7	Uncharacterized protein OS=Homo sapiens GN=FN1 PE=4 SV=1	9649	246447	521	400	146	134	4469	1	0	0	628.34	1254.67	2	1254.67	0	1	29.71	0.015	K	NNQKSEPLIGR	K			m84txb20.2483.2483.2
3	F8W7G7	Uncharacterized protein OS=Homo sapiens GN=FN1 PE=4 SV=1	9649	246447	521	400	146	134	4664	1	0	0	638.31	1274.6	2	1274.6	0	0	29.46	0.011	K	TYHVGEQWQK	E			2_F80TXA20.3418.3418.2
3	F8W7G7	Uncharacterized protein OS=Homo sapiens GN=FN1 PE=4 SV=1	9649	246447	521	400	146	134	4665	1	0	0	638.31	1274.6	2	1274.6	0	0	28.55	0.014	K	TYHVGEQWQK	E			m84txa20.2960.2960.2
3	F8W7G7	Uncharacterized protein OS=Homo sapiens GN=FN1 PE=4 SV=1	9649	246447	521	400	146	134	4666	1	0	0	425.88	1274.6	3	1274.6	0	0	36.19	0.0024	K	TYHVGEQWQK	E			F80CXA20_2.3352.3352.3
3	F8W7G7	Uncharacterized protein OS=Homo sapiens GN=FN1 PE=4 SV=1	9649	246447	521	400	146	134	4667	1	0	0	425.88	1274.6	3	1274.6	0	0	33.37	0.0046	K	TYHVGEQWQK	E			2_F80TXB20.3285.3285.3
3	F8W7G7	Uncharacterized protein OS=Homo sapiens GN=FN1 PE=4 SV=1	9649	246447	521	400	146	134	4898	1	0	0	646.84	1291.67	2	1291.67	0	0	66.54	4.5e-06	R	DLQFVEVTDVK	V			f69cxb20_100930171645.5600.5600.2
3	F8W7G7	Uncharacterized protein OS=Homo sapiens GN=FN1 PE=4 SV=1	9649	246447	521	400	146	134	4899	1	0	0	646.84	1291.67	2	1291.67	0	0	68.02	3.2e-06	R	DLQFVEVTDVK	V			m84txa20.5545.5545.2
3	F8W7G7	Uncharacterized protein OS=Homo sapiens GN=FN1 PE=4 SV=1	9649	246447	521	400	146	134	5217	1	0	0	440.22	1317.64	3	1317.64	0	0	31.8	0.011	K	GEWTCKPIAEK	C			2_F80CXA20_1.3320.3320.3
3	F8W7G7	Uncharacterized protein OS=Homo sapiens GN=FN1 PE=4 SV=1	9649	246447	521	400	146	134	5218	1	0	0	440.22	1317.64	3	1317.64	0	0	32.89	0.0084	K	GEWTCKPIAEK	C			f69cxa20_100930142853.2830.2830.3
3	F8W7G7	Uncharacterized protein OS=Homo sapiens GN=FN1 PE=4 SV=1	9649	246447	521	400	146	134	5219	1	0	0	659.83	1317.64	2	1317.64	0	0	46.46	0.00038	K	GEWTCKPIAEK	C			2_F80CXA20_2.3328.3328.2
3	F8W7G7	Uncharacterized protein OS=Homo sapiens GN=FN1 PE=4 SV=1	9649	246447	521	400	146	134	5220	1	0	0	659.83	1317.64	2	1317.64	0	0	38.06	0.0026	K	GEWTCKPIAEK	C			2_F80TXA20.3364.3364.2
3	F8W7G7	Uncharacterized protein OS=Homo sapiens GN=FN1 PE=4 SV=1	9649	246447	521	400	146	134	5281	1	0	0	441.91	1322.71	3	1322.71	0	0	49.24	0.00015	K	LGVRPSQGGEAPR	E			m84txa20.2199.2199.3
3	F8W7G7	Uncharacterized protein OS=Homo sapiens GN=FN1 PE=4 SV=1	9649	246447	521	400	146	134	5282	1	0	0	441.91	1322.71	3	1322.71	0	0	41.9	0.00084	K	LGVRPSQGGEAPR	E			2_F80CXA20_1.2479.2479.3
3	F8W7G7	Uncharacterized protein OS=Homo sapiens GN=FN1 PE=4 SV=1	9649	246447	521	400	146	134	5283	1	0	0	662.36	1322.71	2	1322.71	0	0	31.08	0.01	K	LGVRPSQGGEAPR	E			f69txa20.2201.2201.2
3	F8W7G7	Uncharacterized protein OS=Homo sapiens GN=FN1 PE=4 SV=1	9649	246447	521	400	146	134	5284	1	0	0	662.36	1322.71	2	1322.71	0	0	49.45	0.00015	K	LGVRPSQGGEAPR	E			m84cxb20.2039.2039.2
3	F8W7G7	Uncharacterized protein OS=Homo sapiens GN=FN1 PE=4 SV=1	9649	246447	521	400	146	134	5381	1	0	0	444.58	1330.71	3	1330.71	0	0	17.9	0.28	R	ESKPLTAQQTTK	L			F80CXA20_1.1797.1797.3
3	F8W7G7	Uncharacterized protein OS=Homo sapiens GN=FN1 PE=4 SV=1	9649	246447	521	400	146	134	5382	1	0	0	444.58	1330.71	3	1330.71	0	0	30.4	0.016	R	ESKPLTAQQTTK	L			2_F80TXA20.1837.1837.3
3	F8W7G7	Uncharacterized protein OS=Homo sapiens GN=FN1 PE=4 SV=1	9649	246447	521	400	146	134	5383	1	0	0	666.36	1330.71	2	1330.71	0	0	29.08	0.021	R	ESKPLTAQQTTK	L			2_F80TXA20.1836.1836.2
3	F8W7G7	Uncharacterized protein OS=Homo sapiens GN=FN1 PE=4 SV=1	9649	246447	521	400	146	134	5384	1	0	0	666.36	1330.71	2	1330.71	0	0	48.16	0.00026	R	ESKPLTAQQTTK	L			f69cxb20_100930171645.1672.1672.2
3	F8W7G7	Uncharacterized protein OS=Homo sapiens GN=FN1 PE=4 SV=1	9649	246447	521	400	146	134	5491	1	0	0	447.9	1340.67	3	1340.67	0	1	38.68	0.0022	R	DGQERDAPIVNK	V			f69cxb20_100930171645.2146.2146.3
3	F8W7G7	Uncharacterized protein OS=Homo sapiens GN=FN1 PE=4 SV=1	9649	246447	521	400	146	134	5492	1	0	0	447.9	1340.67	3	1340.67	0	1	33.51	0.0074	R	DGQERDAPIVNK	V			f69txa20.2160.2160.3
3	F8W7G7	Uncharacterized protein OS=Homo sapiens GN=FN1 PE=4 SV=1	9649	246447	521	400	146	134	5493	1	0	0	671.34	1340.67	2	1340.67	0	1	25.86	0.043	R	DGQERDAPIVNK	V			f69cxb20.2193.2193.2
3	F8W7G7	Uncharacterized protein OS=Homo sapiens GN=FN1 PE=4 SV=1	9649	246447	521	400	146	134	5494	1	0	0	671.34	1340.67	2	1340.67	0	1	18.99	0.21	R	DGQERDAPIVNK	V			f69cxa20.1995.1995.2
3	F8W7G7	Uncharacterized protein OS=Homo sapiens GN=FN1 PE=4 SV=1	9649	246447	521	400	146	134	5495	4	0	0	671.34	1340.67	2	1340.67	0.01	1	5.76	4.9	R	DGQERDAPIVNK	V			2_F80TXB20.6614.6614.2
3	F8W7G7	Uncharacterized protein OS=Homo sapiens GN=FN1 PE=4 SV=1	9649	246447	521	400	146	134	5496	2	0	0	671.34	1340.67	2	1340.67	0.01	1	4.14	7.1	R	DGQERDAPIVNK	V			2_F80CXA20_2.6689.6689.2
3	F8W7G7	Uncharacterized protein OS=Homo sapiens GN=FN1 PE=4 SV=1	9649	246447	521	400	146	134	5619	1	0	0	675.35	1348.68	2	1348.68	0	0	32.29	0.012	K	WLPSSSPVTGYR	V			f69cxb20.4838.4838.2
3	F8W7G7	Uncharacterized protein OS=Homo sapiens GN=FN1 PE=4 SV=1	9649	246447	521	400	146	134	5620	1	0	0	675.35	1348.68	2	1348.68	0	0	40.43	0.0018	K	WLPSSSPVTGYR	V			f69cxa20_100930142853.4793.4793.2
3	F8W7G7	Uncharacterized protein OS=Homo sapiens GN=FN1 PE=4 SV=1	9649	246447	521	400	146	134	5701	1	0	0	678.35	1354.69	2	1354.69	0	0	30.56	0.012	K	IYLYTLNDNAR	S			F80TXB20.8830.8830.2
3	F8W7G7	Uncharacterized protein OS=Homo sapiens GN=FN1 PE=4 SV=1	9649	246447	521	400	146	134	5702	1	0	0	678.35	1354.69	2	1354.69	0	0	34.09	0.0054	K	IYLYTLNDNAR	S			f69cxa20_100930142853.8059.8059.2
3	F8W7G7	Uncharacterized protein OS=Homo sapiens GN=FN1 PE=4 SV=1	9649	246447	521	400	146	134	5703	1	0	0	678.35	1354.69	2	1354.69	0	0	46.14	0.00037	K	IYLYTLNDNAR	S			f69txb20.4977.4977.2
3	F8W7G7	Uncharacterized protein OS=Homo sapiens GN=FN1 PE=4 SV=1	9649	246447	521	400	146	134	5704	1	0	0	678.35	1354.69	2	1354.69	0	0	58.8	2e-05	K	IYLYTLNDNAR	S			m84txb20.5009.5009.2
3	F8W7G7	Uncharacterized protein OS=Homo sapiens GN=FN1 PE=4 SV=1	9649	246447	521	400	146	134	5716	1	0	0	678.84	1355.66	2	1355.66	0	0	20.74	0.098	R	HHPEHFSGRPR	E			2_F80TXB20.1486.1486.2
3	F8W7G7	Uncharacterized protein OS=Homo sapiens GN=FN1 PE=4 SV=1	9649	246447	521	400	146	134	5717	1	0	0	678.84	1355.66	2	1355.66	0	0	12.88	0.6	R	HHPEHFSGRPR	E			F80TXB20.1505.1505.2
3	F8W7G7	Uncharacterized protein OS=Homo sapiens GN=FN1 PE=4 SV=1	9649	246447	521	400	146	134	5718	1	0	0	452.89	1355.66	3	1355.66	0	0	15.03	0.39	R	HHPEHFSGRPR	E			F80TXB20.1490.1490.3
3	F8W7G7	Uncharacterized protein OS=Homo sapiens GN=FN1 PE=4 SV=1	9649	246447	521	400	146	134	5719	1	0	0	452.89	1355.66	3	1355.66	0	0	5.29	3.6	R	HHPEHFSGRPR	E			F80TXA20.1392.1392.3
3	F8W7G7	Uncharacterized protein OS=Homo sapiens GN=FN1 PE=4 SV=1	9649	246447	521	400	146	134	5734	1	0	0	679.35	1356.68	2	1356.68	0	0	4.49	5.8	K	IAWESPQGQVSR	Y			m84txb20.3858.3858.2
3	F8W7G7	Uncharacterized protein OS=Homo sapiens GN=FN1 PE=4 SV=1	9649	246447	521	400	146	134	6002	1	0	0	690.36	1378.7	2	1378.7	0	0	63.4	8.6e-06	K	GLAFTDVDVDSIK	I			F80CXA20_1.6472.6472.2
3	F8W7G7	Uncharacterized protein OS=Homo sapiens GN=FN1 PE=4 SV=1	9649	246447	521	400	146	134	6003	1	0	0	690.36	1378.7	2	1378.7	0	0	64.2	7.2e-06	K	GLAFTDVDVDSIK	I			f69cxa20_100930142853.5835.5835.2
3	F8W7G7	Uncharacterized protein OS=Homo sapiens GN=FN1 PE=4 SV=1	9649	246447	521	400	146	134	6271	1	0	0	467.89	1400.66	3	1400.66	0	0	40.99	0.00088	K	HYQINQQWER	T			m84txb20.3210.3210.3
3	F8W7G7	Uncharacterized protein OS=Homo sapiens GN=FN1 PE=4 SV=1	9649	246447	521	400	146	134	6272	1	0	0	467.89	1400.66	3	1400.66	0	0	44.81	0.00036	K	HYQINQQWER	T			2_F80TXB20.3658.3658.3
3	F8W7G7	Uncharacterized protein OS=Homo sapiens GN=FN1 PE=4 SV=1	9649	246447	521	400	146	134	6273	1	0	0	701.34	1400.66	2	1400.66	0	0	35.34	0.0032	K	HYQINQQWER	T			m84txb20.3207.3207.2
3	F8W7G7	Uncharacterized protein OS=Homo sapiens GN=FN1 PE=4 SV=1	9649	246447	521	400	146	134	6274	1	0	0	701.34	1400.66	2	1400.66	0	0	36.09	0.0027	K	HYQINQQWER	T			f69cxb20_100930171645.3292.3292.2
3	F8W7G7	Uncharacterized protein OS=Homo sapiens GN=FN1 PE=4 SV=1	9649	246447	521	400	146	134	6389	1	0	0	472.54	1414.59	3	1414.59	0	1	1.48	3.6	R	CNDQDTRTSYR	I			F80TXA20.1568.1568.3
3	F8W7G7	Uncharacterized protein OS=Homo sapiens GN=FN1 PE=4 SV=1	9649	246447	521	400	146	134	6390	1	0	0	472.54	1414.59	3	1414.59	0	1	25.41	0.014	R	CNDQDTRTSYR	I			2_F80CXA20_2.1700.1700.3
3	F8W7G7	Uncharacterized protein OS=Homo sapiens GN=FN1 PE=4 SV=1	9649	246447	521	400	146	134	6391	1	0	0	708.3	1414.59	2	1414.59	0	1	23	0.027	R	CNDQDTRTSYR	I			F80CXA20_2.1647.1647.2
3	F8W7G7	Uncharacterized protein OS=Homo sapiens GN=FN1 PE=4 SV=1	9649	246447	521	400	146	134	6392	1	0	0	708.3	1414.59	2	1414.59	0	1	21.19	0.041	R	CNDQDTRTSYR	I			F80CXA20_1.1656.1656.2
3	F8W7G7	Uncharacterized protein OS=Homo sapiens GN=FN1 PE=4 SV=1	9649	246447	521	400	146	134	6571	1	0	0	477.92	1430.74	3	1430.74	0	0	38.66	0.0026	R	WSRPQAPITGYR	I			m84cxa20.3980.3980.3
3	F8W7G7	Uncharacterized protein OS=Homo sapiens GN=FN1 PE=4 SV=1	9649	246447	521	400	146	134	6572	1	0	0	477.92	1430.74	3	1430.74	0	0	21.14	0.15	R	WSRPQAPITGYR	I			m84txb20.3600.3600.3
3	F8W7G7	Uncharacterized protein OS=Homo sapiens GN=FN1 PE=4 SV=1	9649	246447	521	400	146	134	6574	1	0	0	716.38	1430.74	2	1430.74	0	0	24.06	0.076	R	WSRPQAPITGYR	I			F80TXA20.4158.4158.2
3	F8W7G7	Uncharacterized protein OS=Homo sapiens GN=FN1 PE=4 SV=1	9649	246447	521	400	146	134	6877	1	0	0	731.4	1460.78	2	1460.78	0	0	67.7	1.8e-06	R	VPGTSTSATLTGLTR	G			f69cxb20.4382.4382.2
3	F8W7G7	Uncharacterized protein OS=Homo sapiens GN=FN1 PE=4 SV=1	9649	246447	521	400	146	134	6878	1	0	0	731.4	1460.78	2	1460.78	0	0	79.78	1.1e-07	R	VPGTSTSATLTGLTR	G			f69txb20.4125.4125.2
3	F8W7G7	Uncharacterized protein OS=Homo sapiens GN=FN1 PE=4 SV=1	9649	246447	521	400	146	134	6881	1	0	0	731.85	1461.68	2	1461.68	0	0	50.77	9.7e-05	R	GNLLQCICTGNGR	G			2_F80CXA20_1.5532.5532.2
3	F8W7G7	Uncharacterized protein OS=Homo sapiens GN=FN1 PE=4 SV=1	9649	246447	521	400	146	134	6882	1	0	0	731.85	1461.68	2	1461.68	0	0	49.47	0.00013	R	GNLLQCICTGNGR	G			f69cxa20.4900.4900.2
3	F8W7G7	Uncharacterized protein OS=Homo sapiens GN=FN1 PE=4 SV=1	9649	246447	521	400	146	134	6883	1	0	0	488.24	1461.69	3	1461.68	0.01	0	32.34	0.0083	R	GNLLQCICTGNGR	G			F80TXB20.5526.5526.3
3	F8W7G7	Uncharacterized protein OS=Homo sapiens GN=FN1 PE=4 SV=1	9649	246447	521	400	146	134	6884	1	0	0	488.24	1461.69	3	1461.68	0.01	0	27.42	0.026	R	GNLLQCICTGNGR	G			F80CXA20_2.5522.5522.3
3	F8W7G7	Uncharacterized protein OS=Homo sapiens GN=FN1 PE=4 SV=1	9649	246447	521	400	146	134	7084	1	0	0	495.24	1482.69	3	1482.69	0	0	41.69	0.00077	R	GEWTCIAYSQLR	D			2_F80CXA20_2.6012.6012.3
3	F8W7G7	Uncharacterized protein OS=Homo sapiens GN=FN1 PE=4 SV=1	9649	246447	521	400	146	134	7085	1	0	0	495.24	1482.69	3	1482.69	0	0	35.3	0.0033	R	GEWTCIAYSQLR	D			m84cxa20.5760.5760.3
3	F8W7G7	Uncharacterized protein OS=Homo sapiens GN=FN1 PE=4 SV=1	9649	246447	521	400	146	134	7086	1	0	0	742.35	1482.69	2	1482.69	0	0	64.46	4.1e-06	R	GEWTCIAYSQLR	D			F80CXA20_2.5971.5971.2
3	F8W7G7	Uncharacterized protein OS=Homo sapiens GN=FN1 PE=4 SV=1	9649	246447	521	400	146	134	7087	1	0	0	742.35	1482.69	2	1482.69	0	0	68.7	1.5e-06	R	GEWTCIAYSQLR	D			2_F80CXA20_1.6000.6000.2
3	F8W7G7	Uncharacterized protein OS=Homo sapiens GN=FN1 PE=4 SV=1	9649	246447	521	400	146	134	7797	1	0	0	515.26	1542.75	3	1542.76	-0.01	0	10.81	1	R	SYTITGLQPGTDYK	I			2_F80CXA20_2.5146.5146.3
3	F8W7G7	Uncharacterized protein OS=Homo sapiens GN=FN1 PE=4 SV=1	9649	246447	521	400	146	134	7798	1	0	0	515.26	1542.75	3	1542.76	-0.01	0	13.59	0.55	R	SYTITGLQPGTDYK	I			F80CXA20_2.5115.5115.3
3	F8W7G7	Uncharacterized protein OS=Homo sapiens GN=FN1 PE=4 SV=1	9649	246447	521	400	146	134	7799	1	0	0	772.39	1542.76	2	1542.76	0	0	72.43	7.2e-07	R	SYTITGLQPGTDYK	I			m84cxa20.4870.4870.2
3	F8W7G7	Uncharacterized protein OS=Homo sapiens GN=FN1 PE=4 SV=1	9649	246447	521	400	146	134	7800	1	0	0	772.39	1542.76	2	1542.76	0	0	77.41	2.3e-07	R	SYTITGLQPGTDYK	I			m84txb20.4442.4442.2
3	F8W7G7	Uncharacterized protein OS=Homo sapiens GN=FN1 PE=4 SV=1	9649	246447	521	400	146	134	7803	2	0	0	515.28	1542.81	3	1542.8	0	0	5.84	3.9	K	EATIPGHLNSYTIK	G			f69cxb20_100930171645.4155.4155.3
3	F8W7G7	Uncharacterized protein OS=Homo sapiens GN=FN1 PE=4 SV=1	9649	246447	521	400	146	134	7804	1	0	0	515.28	1542.81	3	1542.8	0	0	8.58	2.1	K	EATIPGHLNSYTIK	G			f69cxa20.4057.4057.3
3	F8W7G7	Uncharacterized protein OS=Homo sapiens GN=FN1 PE=4 SV=1	9649	246447	521	400	146	134	8045	1	0	0	523.2	1566.57	3	1566.57	0	0	33.3	0.00047	K	CDPHEATCYDDGK	T			m84txb20.1842.1842.3
3	F8W7G7	Uncharacterized protein OS=Homo sapiens GN=FN1 PE=4 SV=1	9649	246447	521	400	146	134	8046	1	0	0	523.2	1566.57	3	1566.57	0	0	35.32	0.00029	K	CDPHEATCYDDGK	T			2_F80CXA20_2.2139.2139.3
3	F8W7G7	Uncharacterized protein OS=Homo sapiens GN=FN1 PE=4 SV=1	9649	246447	521	400	146	134	8047	1	0	0	784.3	1566.58	2	1566.57	0.01	0	37.57	0.00017	K	CDPHEATCYDDGK	T			f69cxb20_100930171645.1897.1897.2
3	F8W7G7	Uncharacterized protein OS=Homo sapiens GN=FN1 PE=4 SV=1	9649	246447	521	400	146	134	8048	1	0	0	784.3	1566.58	2	1566.57	0.01	0	38.07	0.00016	K	CDPHEATCYDDGK	T			f69cxa20_100930142853.1852.1852.2
3	F8W7G7	Uncharacterized protein OS=Homo sapiens GN=FN1 PE=4 SV=1	9649	246447	521	400	146	134	8229	1	0	0	529.56	1585.65	3	1585.65	0	0	21.61	0.0097	K	WCGTTQNYDADQK	F			F80TXB20.3066.3066.3
3	F8W7G7	Uncharacterized protein OS=Homo sapiens GN=FN1 PE=4 SV=1	9649	246447	521	400	146	134	8230	1	0	0	529.56	1585.65	3	1585.65	0	0	8.29	0.21	K	WCGTTQNYDADQK	F			2_F80TXB20.2991.2991.3
3	F8W7G7	Uncharacterized protein OS=Homo sapiens GN=FN1 PE=4 SV=1	9649	246447	521	400	146	134	8232	1	0	0	793.83	1585.65	2	1585.65	0	0	78.36	2e-08	K	WCGTTQNYDADQK	F			F80CXA20_2.3052.3052.2
3	F8W7G7	Uncharacterized protein OS=Homo sapiens GN=FN1 PE=4 SV=1	9649	246447	521	400	146	134	8277	1	0	0	531.27	1590.8	3	1590.8	0	0	39.9	0.0017	R	GDSPASSKPISINYR	T			2_F80CXA20_2.3846.3846.3
3	F8W7G7	Uncharacterized protein OS=Homo sapiens GN=FN1 PE=4 SV=1	9649	246447	521	400	146	134	8278	1	0	0	531.27	1590.8	3	1590.8	0	0	47.31	0.0003	R	GDSPASSKPISINYR	T			2_F80TXA20.3880.3880.3
3	F8W7G7	Uncharacterized protein OS=Homo sapiens GN=FN1 PE=4 SV=1	9649	246447	521	400	146	134	8279	1	0	0	796.41	1590.8	2	1590.8	0	0	50.71	0.00015	R	GDSPASSKPISINYR	T			f69cxb20_100930171645.3396.3396.2
3	F8W7G7	Uncharacterized protein OS=Homo sapiens GN=FN1 PE=4 SV=1	9649	246447	521	400	146	134	8280	1	0	0	796.41	1590.8	2	1590.8	0	0	63.85	7.1e-06	R	GDSPASSKPISINYR	T			F80CXA20_1.3858.3858.2
3	F8W7G7	Uncharacterized protein OS=Homo sapiens GN=FN1 PE=4 SV=1	9649	246447	521	400	146	134	8297	1	0	0	797.41	1592.8	2	1592.8	0	0	97.3	3e-09	R	VTDATETTITISWR	T			2_F80CXA20_2.6168.6168.2
3	F8W7G7	Uncharacterized protein OS=Homo sapiens GN=FN1 PE=4 SV=1	9649	246447	521	400	146	134	8298	1	0	0	797.41	1592.8	2	1592.8	0	0	99.66	1.7e-09	R	VTDATETTITISWR	T			2_F80TXB20.6082.6082.2
3	F8W7G7	Uncharacterized protein OS=Homo sapiens GN=FN1 PE=4 SV=1	9649	246447	521	400	146	134	8410	1	0	0	536.62	1606.85	3	1606.85	0	1	24.37	0.041	R	QYNVGPSVSKYPLR	N			m84txb20.3730.3730.3
3	F8W7G7	Uncharacterized protein OS=Homo sapiens GN=FN1 PE=4 SV=1	9649	246447	521	400	146	134	8411	1	0	0	536.62	1606.85	3	1606.85	0	1	31.33	0.0082	R	QYNVGPSVSKYPLR	N			m84txa20.3773.3773.3
3	F8W7G7	Uncharacterized protein OS=Homo sapiens GN=FN1 PE=4 SV=1	9649	246447	521	400	146	134	8412	1	0	0	804.43	1606.85	2	1606.85	0	1	18.63	0.16	R	QYNVGPSVSKYPLR	N			m84cxa20.4112.4112.2
3	F8W7G7	Uncharacterized protein OS=Homo sapiens GN=FN1 PE=4 SV=1	9649	246447	521	400	146	134	8413	1	0	0	804.43	1606.85	2	1606.85	0	1	34.39	0.0042	R	QYNVGPSVSKYPLR	N			f69txa20.3924.3924.2
3	F8W7G7	Uncharacterized protein OS=Homo sapiens GN=FN1 PE=4 SV=1	9649	246447	521	400	146	134	8606	1	0	0	542.62	1624.84	3	1624.84	0	1	15.92	0.31	R	IRHHPEHFSGRPR	E			2_F80CXA20_2.1601.1601.3
3	F8W7G7	Uncharacterized protein OS=Homo sapiens GN=FN1 PE=4 SV=1	9649	246447	521	400	146	134	8607	1	0	0	542.62	1624.84	3	1624.84	0	1	34.27	0.0046	R	IRHHPEHFSGRPR	E			F80CXA20_2.1519.1519.3
3	F8W7G7	Uncharacterized protein OS=Homo sapiens GN=FN1 PE=4 SV=1	9649	246447	521	400	146	134	8608	1	0	0	407.22	1624.84	4	1624.84	0	1	15.97	0.31	R	IRHHPEHFSGRPR	E			2_F80CXA20_1.1614.1614.4
3	F8W7G7	Uncharacterized protein OS=Homo sapiens GN=FN1 PE=4 SV=1	9649	246447	521	400	146	134	8609	1	0	0	407.22	1624.84	4	1624.84	0	1	22.64	0.066	R	IRHHPEHFSGRPR	E			2_F80CXA20_2.1639.1639.4
3	F8W7G7	Uncharacterized protein OS=Homo sapiens GN=FN1 PE=4 SV=1	9649	246447	521	400	146	134	8610	1	0	0	813.43	1624.84	2	1624.84	0	1	14.22	0.48	R	IRHHPEHFSGRPR	E			F80CXA20_1.1555.1555.2
3	F8W7G7	Uncharacterized protein OS=Homo sapiens GN=FN1 PE=4 SV=1	9649	246447	521	400	146	134	8611	1	0	0	813.43	1624.84	2	1624.84	0	1	21.09	0.098	R	IRHHPEHFSGRPR	E			2_F80CXA20_2.1613.1613.2
3	F8W7G7	Uncharacterized protein OS=Homo sapiens GN=FN1 PE=4 SV=1	9649	246447	521	400	146	134	8653	1	0	0	543.96	1628.86	3	1628.86	0	0	7.27	2.5	R	VDVIPVNLPGEHGQR	L			f69cxb20_100930171645.7138.7138.3
3	F8W7G7	Uncharacterized protein OS=Homo sapiens GN=FN1 PE=4 SV=1	9649	246447	521	400	146	134	8654	1	0	0	543.96	1628.86	3	1628.86	0	0	4.6	4.7	R	VDVIPVNLPGEHGQR	L			f69txa20.7419.7419.3
3	F8W7G7	Uncharacterized protein OS=Homo sapiens GN=FN1 PE=4 SV=1	9649	246447	521	400	146	134	8655	1	0	0	815.44	1628.86	2	1628.86	0	0	67.47	2.4e-06	R	VDVIPVNLPGEHGQR	L			f69cxa20_100930142853.5003.5003.2
3	F8W7G7	Uncharacterized protein OS=Homo sapiens GN=FN1 PE=4 SV=1	9649	246447	521	400	146	134	8656	1	0	0	815.44	1628.86	2	1628.86	0	0	54.2	5.1e-05	R	VDVIPVNLPGEHGQR	L			2_F80CXA20_2.5584.5584.2
3	F8W7G7	Uncharacterized protein OS=Homo sapiens GN=FN1 PE=4 SV=1	9649	246447	521	400	146	134	8657	1	0	0	543.96	1628.87	3	1628.86	0	0	22.81	0.073	R	VDVIPVNLPGEHGQR	L			F80CXA20_2.5559.5559.3
3	F8W7G7	Uncharacterized protein OS=Homo sapiens GN=FN1 PE=4 SV=1	9649	246447	521	400	146	134	8658	1	0	0	543.96	1628.87	3	1628.86	0	0	32.36	0.0081	R	VDVIPVNLPGEHGQR	L			F80TXA20.5557.5557.3
3	F8W7G7	Uncharacterized protein OS=Homo sapiens GN=FN1 PE=4 SV=1	9649	246447	521	400	146	134	8785	1	0	0	547.9	1640.67	3	1640.67	0	0	16.84	0.071	K	DSMIWDCTCIGAGR	G			m84cxa20.5958.5958.3
3	F8W7G7	Uncharacterized protein OS=Homo sapiens GN=FN1 PE=4 SV=1	9649	246447	521	400	146	134	8786	1	0	0	547.9	1640.67	3	1640.67	0	0	23.54	0.015	K	DSMIWDCTCIGAGR	G			f69cxa20.5580.5580.3
3	F8W7G7	Uncharacterized protein OS=Homo sapiens GN=FN1 PE=4 SV=1	9649	246447	521	400	146	134	8787	1	0	0	821.35	1640.68	2	1640.67	0	0	69.21	4.4e-07	K	DSMIWDCTCIGAGR	G			2_F80CXA20_2.6186.6186.2
3	F8W7G7	Uncharacterized protein OS=Homo sapiens GN=FN1 PE=4 SV=1	9649	246447	521	400	146	134	8788	1	0	0	821.35	1640.68	2	1640.67	0	0	63.43	1.7e-06	K	DSMIWDCTCIGAGR	G			2_F80CXA20_1.6185.6185.2
3	F8W7G7	Uncharacterized protein OS=Homo sapiens GN=FN1 PE=4 SV=1	9649	246447	521	400	146	134	8978	1	0	0	829.34	1656.67	2	1656.67	0	0	54.71	4.7e-06	K	DSMIWDCTCIGAGR	G	Oxidation (M)	0.00100000000000.0	2_F80CXA20_1.5475.5475.2
3	F8W7G7	Uncharacterized protein OS=Homo sapiens GN=FN1 PE=4 SV=1	9649	246447	521	400	146	134	8979	1	0	0	829.34	1656.67	2	1656.67	0	0	45.77	3.7e-05	K	DSMIWDCTCIGAGR	G	Oxidation (M)	0.00100000000000.0	f69cxa20.4819.4819.2
3	F8W7G7	Uncharacterized protein OS=Homo sapiens GN=FN1 PE=4 SV=1	9649	246447	521	400	146	134	9723	1	0	0	863.92	1725.82	2	1725.81	0	0	81.06	8.8e-08	K	YSFCTDHTVLVQTR	G			F80TXA20.4820.4820.2
3	F8W7G7	Uncharacterized protein OS=Homo sapiens GN=FN1 PE=4 SV=1	9649	246447	521	400	146	134	9724	1	0	0	863.92	1725.82	2	1725.81	0	0	73.77	4.7e-07	K	YSFCTDHTVLVQTR	G			F80CXA20_2.4825.4825.2
3	F8W7G7	Uncharacterized protein OS=Homo sapiens GN=FN1 PE=4 SV=1	9649	246447	521	400	146	134	9725	1	0	0	576.28	1725.82	3	1725.81	0	0	34.24	0.0043	K	YSFCTDHTVLVQTR	G			f69txa20.4433.4433.3
3	F8W7G7	Uncharacterized protein OS=Homo sapiens GN=FN1 PE=4 SV=1	9649	246447	521	400	146	134	9726	1	0	0	576.28	1725.82	3	1725.81	0	0	27.56	0.02	K	YSFCTDHTVLVQTR	G			m84txb20.4312.4312.3
3	F8W7G7	Uncharacterized protein OS=Homo sapiens GN=FN1 PE=4 SV=1	9649	246447	521	400	146	134	9759	1	0	0	578.32	1731.94	3	1731.94	0	0	57.59	1.8e-05	R	NLQPASEYTVSLVAIK	G			F80TXA20.6600.6600.3
3	F8W7G7	Uncharacterized protein OS=Homo sapiens GN=FN1 PE=4 SV=1	9649	246447	521	400	146	134	9760	1	0	0	578.32	1731.94	3	1731.94	0	0	62.31	6.1e-06	R	NLQPASEYTVSLVAIK	G			2_F80TXB20.6530.6530.3
3	F8W7G7	Uncharacterized protein OS=Homo sapiens GN=FN1 PE=4 SV=1	9649	246447	521	400	146	134	9761	1	0	0	866.98	1731.94	2	1731.94	0	0	78.57	1.5e-07	R	NLQPASEYTVSLVAIK	G			m84txb20.5951.5951.2
3	F8W7G7	Uncharacterized protein OS=Homo sapiens GN=FN1 PE=4 SV=1	9649	246447	521	400	146	134	9762	1	0	0	866.98	1731.94	2	1731.94	0	0	80.22	1e-07	R	NLQPASEYTVSLVAIK	G			m84txb20.5844.5844.2
3	F8W7G7	Uncharacterized protein OS=Homo sapiens GN=FN1 PE=4 SV=1	9649	246447	521	400	146	134	10145	1	0	0	590.33	1767.97	3	1767.97	0	1	33.31	0.0035	R	IGFKLGVRPSQGGEAPR	E			2_F80CXA20_1.4386.4386.3
3	F8W7G7	Uncharacterized protein OS=Homo sapiens GN=FN1 PE=4 SV=1	9649	246447	521	400	146	134	10146	1	0	0	590.33	1767.97	3	1767.97	0	1	29.44	0.0086	R	IGFKLGVRPSQGGEAPR	E			F80TXA20.4351.4351.3
3	F8W7G7	Uncharacterized protein OS=Homo sapiens GN=FN1 PE=4 SV=1	9649	246447	521	400	146	134	10147	1	0	0	443	1767.98	4	1767.97	0	1	23.41	0.036	R	IGFKLGVRPSQGGEAPR	E			2_F80TXB20.4331.4331.4
3	F8W7G7	Uncharacterized protein OS=Homo sapiens GN=FN1 PE=4 SV=1	9649	246447	521	400	146	134	10148	1	0	0	443	1767.98	4	1767.97	0	1	24.24	0.03	R	IGFKLGVRPSQGGEAPR	E			2_F80TXA20.4427.4427.4
3	F8W7G7	Uncharacterized protein OS=Homo sapiens GN=FN1 PE=4 SV=1	9649	246447	521	400	146	134	10149	1	0	0	885	1767.98	2	1767.97	0	1	32.28	0.0042	R	IGFKLGVRPSQGGEAPR	E			2_F80CXA20_1.4392.4392.2
3	F8W7G7	Uncharacterized protein OS=Homo sapiens GN=FN1 PE=4 SV=1	9649	246447	521	400	146	134	10150	1	0	0	885	1767.98	2	1767.97	0	1	38.95	0.0009	R	IGFKLGVRPSQGGEAPR	E			F80CXA20_2.4355.4355.2
3	F8W7G7	Uncharacterized protein OS=Homo sapiens GN=FN1 PE=4 SV=1	9649	246447	521	400	146	134	10359	1	0	0	896.41	1790.81	2	1790.81	0	0	73.82	4.5e-07	R	TYLGNALVCTCYGGSR	G			f69cxa20_100930142853.4991.4991.2
3	F8W7G7	Uncharacterized protein OS=Homo sapiens GN=FN1 PE=4 SV=1	9649	246447	521	400	146	134	10360	1	0	0	896.41	1790.81	2	1790.81	0	0	82.94	5.5e-08	R	TYLGNALVCTCYGGSR	G			f69txb20.4834.4834.2
3	F8W7G7	Uncharacterized protein OS=Homo sapiens GN=FN1 PE=4 SV=1	9649	246447	521	400	146	134	10361	1	0	0	597.94	1790.81	3	1790.81	0	0	48.6	0.00015	R	TYLGNALVCTCYGGSR	G			2_F80TXA20.5640.5640.3
3	F8W7G7	Uncharacterized protein OS=Homo sapiens GN=FN1 PE=4 SV=1	9649	246447	521	400	146	134	10362	1	0	0	597.94	1790.81	3	1790.81	0	0	44.1	0.00042	R	TYLGNALVCTCYGGSR	G			m84cxb20.4852.4852.3
3	F8W7G7	Uncharacterized protein OS=Homo sapiens GN=FN1 PE=4 SV=1	9649	246447	521	400	146	134	10367	1	0	0	598.61	1792.8	3	1792.8	0	1	11.96	0.6	R	CHEGGQSYKIGDTWR	R			f69txb20.3206.3206.3
3	F8W7G7	Uncharacterized protein OS=Homo sapiens GN=FN1 PE=4 SV=1	9649	246447	521	400	146	134	10368	1	0	0	598.61	1792.8	3	1792.8	0	1	11.82	0.62	R	CHEGGQSYKIGDTWR	R			m84txa20.3339.3339.3
3	F8W7G7	Uncharacterized protein OS=Homo sapiens GN=FN1 PE=4 SV=1	9649	246447	521	400	146	134	10492	1	0	0	603.31	1806.9	3	1806.9	0	0	53.53	7.2e-05	K	VTIMWTPPESAVTGYR	V			F80TXA20.6858.6858.3
3	F8W7G7	Uncharacterized protein OS=Homo sapiens GN=FN1 PE=4 SV=1	9649	246447	521	400	146	134	10493	1	0	0	603.31	1806.9	3	1806.9	0	0	40.8	0.0014	K	VTIMWTPPESAVTGYR	V			2_F80TXA20.6904.6904.3
3	F8W7G7	Uncharacterized protein OS=Homo sapiens GN=FN1 PE=4 SV=1	9649	246447	521	400	146	134	10494	1	0	0	904.46	1806.9	2	1806.9	0	0	50.4	0.00015	K	VTIMWTPPESAVTGYR	V			f69txb20.6053.6053.2
3	F8W7G7	Uncharacterized protein OS=Homo sapiens GN=FN1 PE=4 SV=1	9649	246447	521	400	146	134	10495	1	0	0	904.46	1806.9	2	1806.9	0	0	37.27	0.003	K	VTIMWTPPESAVTGYR	V			F80TXA20.6847.6847.2
3	F8W7G7	Uncharacterized protein OS=Homo sapiens GN=FN1 PE=4 SV=1	9649	246447	521	400	146	134	10601	1	0	0	910.01	1818	2	1818	0	1	37.89	0.00082	R	ITGYIIKYEKPGSPPR	E			2_F80TXA20.4323.4323.2
3	F8W7G7	Uncharacterized protein OS=Homo sapiens GN=FN1 PE=4 SV=1	9649	246447	521	400	146	134	10602	1	0	0	910.01	1818	2	1818	0	1	52.95	2.6e-05	R	ITGYIIKYEKPGSPPR	E			F80TXB20.4251.4251.2
3	F8W7G7	Uncharacterized protein OS=Homo sapiens GN=FN1 PE=4 SV=1	9649	246447	521	400	146	134	10605	1	0	0	607.01	1818.01	3	1818	0	1	32.97	0.0021	R	ITGYIIKYEKPGSPPR	E			m84txa20.3740.3740.3
3	F8W7G7	Uncharacterized protein OS=Homo sapiens GN=FN1 PE=4 SV=1	9649	246447	521	400	146	134	10606	1	0	0	607.01	1818.01	3	1818	0	1	23.81	0.018	R	ITGYIIKYEKPGSPPR	E			m84txb20.3704.3704.3
3	F8W7G7	Uncharacterized protein OS=Homo sapiens GN=FN1 PE=4 SV=1	9649	246447	521	400	146	134	10628	1	0	0	607.66	1819.94	3	1819.94	0	1	19.2	0.17	R	ARVTDATETTITISWR	T			2_F80CXA20_1.5791.5791.3
3	F8W7G7	Uncharacterized protein OS=Homo sapiens GN=FN1 PE=4 SV=1	9649	246447	521	400	146	134	10629	1	0	0	607.66	1819.94	3	1819.94	0	1	25.32	0.041	R	ARVTDATETTITISWR	T			F80CXA20_1.5795.5795.3
3	F8W7G7	Uncharacterized protein OS=Homo sapiens GN=FN1 PE=4 SV=1	9649	246447	521	400	146	134	10686	1	0	0	912.45	1822.89	2	1822.89	0	0	50.02	0.00014	K	VTIMWTPPESAVTGYR	V	Oxidation (M)	0.0001000000000000.0	f69cxa20_100930142853.5722.5722.2
3	F8W7G7	Uncharacterized protein OS=Homo sapiens GN=FN1 PE=4 SV=1	9649	246447	521	400	146	134	10687	1	0	0	912.45	1822.89	2	1822.89	0	0	46.92	0.00028	K	VTIMWTPPESAVTGYR	V	Oxidation (M)	0.0001000000000000.0	f69cxb20.5749.5749.2
3	F8W7G7	Uncharacterized protein OS=Homo sapiens GN=FN1 PE=4 SV=1	9649	246447	521	400	146	134	10688	1	0	0	608.64	1822.89	3	1822.89	0	0	15.07	0.42	K	VTIMWTPPESAVTGYR	V	Oxidation (M)	0.0001000000000000.0	f69cxb20.5772.5772.3
3	F8W7G7	Uncharacterized protein OS=Homo sapiens GN=FN1 PE=4 SV=1	9649	246447	521	400	146	134	10971	1	0	0	616.63	1846.85	3	1846.85	0	1	28.55	0.015	K	DNRGNLLQCICTGNGR	G			2_F80CXA20_1.5139.5139.3
3	F8W7G7	Uncharacterized protein OS=Homo sapiens GN=FN1 PE=4 SV=1	9649	246447	521	400	146	134	10972	1	0	0	616.63	1846.85	3	1846.85	0	1	35.75	0.0028	K	DNRGNLLQCICTGNGR	G			F80CXA20_2.5088.5088.3
3	F8W7G7	Uncharacterized protein OS=Homo sapiens GN=FN1 PE=4 SV=1	9649	246447	521	400	146	134	10974	1	0	0	924.44	1846.86	2	1846.85	0	1	16.55	0.26	K	DNRGNLLQCICTGNGR	G			F80CXA20_2.5092.5092.2
3	F8W7G7	Uncharacterized protein OS=Homo sapiens GN=FN1 PE=4 SV=1	9649	246447	521	400	146	134	11041	1	0	0	618.94	1853.8	3	1853.8	0	1	10.21	0.43	K	DSMIWDCTCIGAGRGR	I			F80CXA20_1.5635.5635.3
3	F8W7G7	Uncharacterized protein OS=Homo sapiens GN=FN1 PE=4 SV=1	9649	246447	521	400	146	134	11042	1	0	0	618.94	1853.8	3	1853.8	0	1	23.95	0.018	K	DSMIWDCTCIGAGRGR	I			2_F80CXA20_1.5608.5608.3
3	F8W7G7	Uncharacterized protein OS=Homo sapiens GN=FN1 PE=4 SV=1	9649	246447	521	400	146	134	11073	1	0	0	620	1856.98	3	1856.98	0	1	28.81	0.013	R	WKEATIPGHLNSYTIK	G			F80TXA20.4898.4898.3
3	F8W7G7	Uncharacterized protein OS=Homo sapiens GN=FN1 PE=4 SV=1	9649	246447	521	400	146	134	11074	1	0	0	620	1856.98	3	1856.98	0	1	27.18	0.019	R	WKEATIPGHLNSYTIK	G			f69cxb20.4437.4437.3
3	F8W7G7	Uncharacterized protein OS=Homo sapiens GN=FN1 PE=4 SV=1	9649	246447	521	400	146	134	11075	1	0	0	465.25	1856.98	4	1856.98	0	1	8.46	1.3	R	WKEATIPGHLNSYTIK	G			2_F80TXB20.4867.4867.4
3	F8W7G7	Uncharacterized protein OS=Homo sapiens GN=FN1 PE=4 SV=1	9649	246447	521	400	146	134	11076	2	0	0	465.25	1856.98	4	1856.98	0	1	0.93	7.5	R	WKEATIPGHLNSYTIK	G			f69txa20.4531.4531.4
3	F8W7G7	Uncharacterized protein OS=Homo sapiens GN=FN1 PE=4 SV=1	9649	246447	521	400	146	134	11077	1	0	0	929.5	1856.98	2	1856.98	0	1	32.06	0.0058	R	WKEATIPGHLNSYTIK	G			F80TXB20.4918.4918.2
3	F8W7G7	Uncharacterized protein OS=Homo sapiens GN=FN1 PE=4 SV=1	9649	246447	521	400	146	134	11078	1	0	0	929.5	1856.98	2	1856.98	0	1	61.33	6.8e-06	R	WKEATIPGHLNSYTIK	G			F80CXA20_2.4903.4903.2
3	F8W7G7	Uncharacterized protein OS=Homo sapiens GN=FN1 PE=4 SV=1	9649	246447	521	400	146	134	11140	1	0	0	621.97	1862.88	3	1862.88	0	0	40.91	0.001	R	HTSVQTTSSGSGPFTDVR	A			F80TXA20.3831.3831.3
3	F8W7G7	Uncharacterized protein OS=Homo sapiens GN=FN1 PE=4 SV=1	9649	246447	521	400	146	134	11141	1	0	0	621.97	1862.88	3	1862.88	0	0	52.95	6.4e-05	R	HTSVQTTSSGSGPFTDVR	A			m84txa20.3392.3392.3
3	F8W7G7	Uncharacterized protein OS=Homo sapiens GN=FN1 PE=4 SV=1	9649	246447	521	400	146	134	11142	1	0	0	932.45	1862.88	2	1862.88	0	0	111.12	9.7e-11	R	HTSVQTTSSGSGPFTDVR	A			f69cxa20_100930142853.3357.3357.2
3	F8W7G7	Uncharacterized protein OS=Homo sapiens GN=FN1 PE=4 SV=1	9649	246447	521	400	146	134	11143	1	0	0	932.45	1862.88	2	1862.88	0	0	82.93	6.4e-08	R	HTSVQTTSSGSGPFTDVR	A			F80CXA20_1.3889.3889.2
3	F8W7G7	Uncharacterized protein OS=Homo sapiens GN=FN1 PE=4 SV=1	9649	246447	521	400	146	134	11212	1	0	0	936.38	1870.74	2	1870.74	0	0	29.02	0.0024	R	QGENGQMMSCTCLGNGK	G			f69cxb20_100930171645.3391.3391.2
3	F8W7G7	Uncharacterized protein OS=Homo sapiens GN=FN1 PE=4 SV=1	9649	246447	521	400	146	134	11213	1	0	0	936.38	1870.74	2	1870.74	0	0	71.62	1.3e-07	R	QGENGQMMSCTCLGNGK	G			F80TXB20.3696.3696.2
3	F8W7G7	Uncharacterized protein OS=Homo sapiens GN=FN1 PE=4 SV=1	9649	246447	521	400	146	134	11298	1	0	0	939.9	1877.79	2	1877.79	0	0	44.87	9e-05	K	EYLGAICSCTCFGGQR	G			2_F80TXB20.8738.8738.2
3	F8W7G7	Uncharacterized protein OS=Homo sapiens GN=FN1 PE=4 SV=1	9649	246447	521	400	146	134	11299	1	0	0	939.9	1877.79	2	1877.79	0	0	52.64	1.5e-05	K	EYLGAICSCTCFGGQR	G			m84txb20.7948.7948.2
3	F8W7G7	Uncharacterized protein OS=Homo sapiens GN=FN1 PE=4 SV=1	9649	246447	521	400	146	134	11300	1	0	0	626.94	1877.79	3	1877.79	0	0	41.56	0.00019	K	EYLGAICSCTCFGGQR	G			f69cxb20.4943.4943.3
3	F8W7G7	Uncharacterized protein OS=Homo sapiens GN=FN1 PE=4 SV=1	9649	246447	521	400	146	134	11301	1	0	0	626.94	1877.79	3	1877.79	0	0	56.49	6.2e-06	K	EYLGAICSCTCFGGQR	G			F80CXA20_1.5487.5487.3
3	F8W7G7	Uncharacterized protein OS=Homo sapiens GN=FN1 PE=4 SV=1	9649	246447	521	400	146	134	11302	1	0	0	939.9	1877.79	2	1877.79	0	0	89.71	2.9e-09	K	EYLGAICSCTCFGGQR	G			2_F80TXA20.5533.5533.2
3	F8W7G7	Uncharacterized protein OS=Homo sapiens GN=FN1 PE=4 SV=1	9649	246447	521	400	146	134	11303	1	0	0	939.9	1877.79	2	1877.79	0	0	85.21	8.3e-09	K	EYLGAICSCTCFGGQR	G			F80TXB20.5433.5433.2
3	F8W7G7	Uncharacterized protein OS=Homo sapiens GN=FN1 PE=4 SV=1	9649	246447	521	400	146	134	11304	1	0	0	939.91	1877.8	2	1877.79	0.01	0	37.44	0.00061	K	EYLGAICSCTCFGGQR	G			m84txb20.6389.6389.2
3	F8W7G7	Uncharacterized protein OS=Homo sapiens GN=FN1 PE=4 SV=1	9649	246447	521	400	146	134	11305	1	0	0	939.91	1877.8	2	1877.79	0.01	0	56.71	7.3e-06	K	EYLGAICSCTCFGGQR	G			m84txb20.6617.6617.2
3	F8W7G7	Uncharacterized protein OS=Homo sapiens GN=FN1 PE=4 SV=1	9649	246447	521	400	146	134	11306	1	0	0	939.91	1877.8	2	1877.79	0.01	0	61.4	2.5e-06	K	EYLGAICSCTCFGGQR	G			m84txb20.6649.6649.2
3	F8W7G7	Uncharacterized protein OS=Homo sapiens GN=FN1 PE=4 SV=1	9649	246447	521	400	146	134	11680	1	0	0	638.34	1911.98	3	1911.99	-0.01	0	4.31	5.5	R	SSPVVIDASTAIDAPSNLR	F			m84txa20.7272.7272.3
3	F8W7G7	Uncharacterized protein OS=Homo sapiens GN=FN1 PE=4 SV=1	9649	246447	521	400	146	134	11682	1	0	0	957	1911.99	2	1911.99	0	0	68.43	1.8e-06	R	SSPVVIDASTAIDAPSNLR	F			m84txb20.5005.5005.2
3	F8W7G7	Uncharacterized protein OS=Homo sapiens GN=FN1 PE=4 SV=1	9649	246447	521	400	146	134	11683	1	0	0	957	1911.99	2	1911.99	0	0	72.57	7e-07	R	SSPVVIDASTAIDAPSNLR	F			f69cxb20_100930171645.5141.5141.2
3	F8W7G7	Uncharacterized protein OS=Homo sapiens GN=FN1 PE=4 SV=1	9649	246447	521	400	146	134	11684	1	0	0	638.34	1911.99	3	1911.99	0	0	40.66	0.001	R	SSPVVIDASTAIDAPSNLR	F			F80TXA20.5975.5975.3
3	F8W7G7	Uncharacterized protein OS=Homo sapiens GN=FN1 PE=4 SV=1	9649	246447	521	400	146	134	11685	1	0	0	638.34	1911.99	3	1911.99	0	0	52.49	6.8e-05	R	SSPVVIDASTAIDAPSNLR	F			2_F80CXA20_2.5995.5995.3
3	F8W7G7	Uncharacterized protein OS=Homo sapiens GN=FN1 PE=4 SV=1	9649	246447	521	400	146	134	11686	1	0	0	957	1911.99	2	1911.99	0	0	70.61	1e-06	R	SSPVVIDASTAIDAPSNLR	F			f69txa20.5661.5661.2
3	F8W7G7	Uncharacterized protein OS=Homo sapiens GN=FN1 PE=4 SV=1	9649	246447	521	400	146	134	11687	1	0	0	957	1911.99	2	1911.99	0	0	78.32	1.8e-07	R	SSPVVIDASTAIDAPSNLR	F			f69cxa20_100930142853.5375.5375.2
3	F8W7G7	Uncharacterized protein OS=Homo sapiens GN=FN1 PE=4 SV=1	9649	246447	521	400	146	134	11846	1	0	0	963.53	1925.04	2	1925.04	0	0	77.93	1.1e-07	R	VTWAPPPSIDLTNFLVR	Y			f69txa20.8144.8144.2
3	F8W7G7	Uncharacterized protein OS=Homo sapiens GN=FN1 PE=4 SV=1	9649	246447	521	400	146	134	11847	1	0	0	963.53	1925.04	2	1925.04	0	0	52.03	4.3e-05	R	VTWAPPPSIDLTNFLVR	Y			m84txb20.7682.7682.2
3	F8W7G7	Uncharacterized protein OS=Homo sapiens GN=FN1 PE=4 SV=1	9649	246447	521	400	146	134	11848	1	0	0	642.69	1925.04	3	1925.04	0	0	37.3	0.0013	R	VTWAPPPSIDLTNFLVR	Y			f69txb20.7587.7587.3
3	F8W7G7	Uncharacterized protein OS=Homo sapiens GN=FN1 PE=4 SV=1	9649	246447	521	400	146	134	11849	1	0	0	642.69	1925.04	3	1925.04	0	0	37.24	0.0013	R	VTWAPPPSIDLTNFLVR	Y			m84txb20.7683.7683.3
3	F8W7G7	Uncharacterized protein OS=Homo sapiens GN=FN1 PE=4 SV=1	9649	246447	521	400	146	134	11855	1	0	0	964.02	1926.03	2	1926.04	-0.01	0	64.04	3.4e-06	R	FLATTPNSLLVSWQPPR	A			m84cxb20.6733.6733.2
3	F8W7G7	Uncharacterized protein OS=Homo sapiens GN=FN1 PE=4 SV=1	9649	246447	521	400	146	134	11856	1	0	0	964.02	1926.03	2	1926.04	-0.01	0	69.11	1.1e-06	R	FLATTPNSLLVSWQPPR	A			m84txa20.6980.6980.2
3	F8W7G7	Uncharacterized protein OS=Homo sapiens GN=FN1 PE=4 SV=1	9649	246447	521	400	146	134	11857	1	0	0	643.02	1926.04	3	1926.04	0	0	60.81	6.9e-06	R	FLATTPNSLLVSWQPPR	A			2_F80CXA20_2.7674.7674.3
3	F8W7G7	Uncharacterized protein OS=Homo sapiens GN=FN1 PE=4 SV=1	9649	246447	521	400	146	134	11858	1	0	0	643.02	1926.04	3	1926.04	0	0	58.54	1.2e-05	R	FLATTPNSLLVSWQPPR	A			f69cxa20.6980.6980.3
3	F8W7G7	Uncharacterized protein OS=Homo sapiens GN=FN1 PE=4 SV=1	9649	246447	521	400	146	134	12114	1	0	0	652.34	1954	3	1954	0	0	39.57	0.0016	R	EESPLLIGQQSTVSDVPR	D			f69cxb20.5269.5269.3
3	F8W7G7	Uncharacterized protein OS=Homo sapiens GN=FN1 PE=4 SV=1	9649	246447	521	400	146	134	12115	1	0	0	652.34	1954	3	1954	0	0	43.45	0.00063	R	EESPLLIGQQSTVSDVPR	D			f69cxb20_100930171645.5237.5237.3
3	F8W7G7	Uncharacterized protein OS=Homo sapiens GN=FN1 PE=4 SV=1	9649	246447	521	400	146	134	12116	1	0	0	978.01	1954	2	1954	0	0	72.89	6.5e-07	R	EESPLLIGQQSTVSDVPR	D			m84txa20.5162.5162.2
3	F8W7G7	Uncharacterized protein OS=Homo sapiens GN=FN1 PE=4 SV=1	9649	246447	521	400	146	134	12117	1	0	0	978.01	1954	2	1954	0	0	75.23	3.8e-07	R	EESPLLIGQQSTVSDVPR	D			f69cxa20.5134.5134.2
3	F8W7G7	Uncharacterized protein OS=Homo sapiens GN=FN1 PE=4 SV=1	9649	246447	521	400	146	134	12194	1	0	0	654.98	1961.92	3	1961.92	0	1	5.05	2.9	R	GNLLQCICTGNGRGEWK	C			f69txb20.5045.5045.3
3	F8W7G7	Uncharacterized protein OS=Homo sapiens GN=FN1 PE=4 SV=1	9649	246447	521	400	146	134	12195	1	0	0	654.98	1961.92	3	1961.92	0	1	10.09	0.91	R	GNLLQCICTGNGRGEWK	C			m84cxb20.5038.5038.3
3	F8W7G7	Uncharacterized protein OS=Homo sapiens GN=FN1 PE=4 SV=1	9649	246447	521	400	146	134	12196	1	0	0	981.98	1961.94	2	1961.92	0.02	1	47.03	0.00024	R	GNLLQCICTGNGRGEWK	C			F80TXB20.5784.5784.2
3	F8W7G7	Uncharacterized protein OS=Homo sapiens GN=FN1 PE=4 SV=1	9649	246447	521	400	146	134	12197	1	0	0	981.98	1961.94	2	1961.92	0.02	1	45.72	0.00032	R	GNLLQCICTGNGRGEWK	C			F80CXA20_2.5755.5755.2
3	F8W7G7	Uncharacterized protein OS=Homo sapiens GN=FN1 PE=4 SV=1	9649	246447	521	400	146	134	12348	1	0	0	989.03	1976.04	2	1976.04	0	1	51.95	5.5e-05	K	WLPSSSPVTGYRVTTTPK	N			F80TXB20.5207.5207.2
3	F8W7G7	Uncharacterized protein OS=Homo sapiens GN=FN1 PE=4 SV=1	9649	246447	521	400	146	134	12349	1	0	0	989.03	1976.04	2	1976.04	0	1	60.27	8.1e-06	K	WLPSSSPVTGYRVTTTPK	N			2_F80CXA20_1.5213.5213.2
3	F8W7G7	Uncharacterized protein OS=Homo sapiens GN=FN1 PE=4 SV=1	9649	246447	521	400	146	134	12405	1	0	0	496.97	1983.85	4	1983.85	0	1	34.42	0.0012	R	IGDQWDKQHDMGHMMR	C			F80CXA20_1.3910.3910.4
3	F8W7G7	Uncharacterized protein OS=Homo sapiens GN=FN1 PE=4 SV=1	9649	246447	521	400	146	134	12406	1	0	0	496.97	1983.85	4	1983.85	0	1	27.17	0.0064	R	IGDQWDKQHDMGHMMR	C			F80TXB20.3885.3885.4
3	F8W7G7	Uncharacterized protein OS=Homo sapiens GN=FN1 PE=4 SV=1	9649	246447	521	400	146	134	12407	1	0	0	662.29	1983.85	3	1983.85	0	1	48.55	4.5e-05	R	IGDQWDKQHDMGHMMR	C			F80TXA20.3837.3837.3
3	F8W7G7	Uncharacterized protein OS=Homo sapiens GN=FN1 PE=4 SV=1	9649	246447	521	400	146	134	12408	1	0	0	662.29	1983.85	3	1983.85	0	1	26.01	0.008	R	IGDQWDKQHDMGHMMR	C			f69cxa20_100930142853.3587.3587.3
3	F8W7G7	Uncharacterized protein OS=Homo sapiens GN=FN1 PE=4 SV=1	9649	246447	521	400	146	134	12409	1	0	0	992.93	1983.85	2	1983.85	0	1	14.37	0.12	R	IGDQWDKQHDMGHMMR	C			2_F80CXA20_1.3903.3903.2
3	F8W7G7	Uncharacterized protein OS=Homo sapiens GN=FN1 PE=4 SV=1	9649	246447	521	400	146	134	12410	1	0	0	992.93	1983.85	2	1983.85	0	1	58.78	4.2e-06	R	IGDQWDKQHDMGHMMR	C			F80CXA20_2.3873.3873.2
3	F8W7G7	Uncharacterized protein OS=Homo sapiens GN=FN1 PE=4 SV=1	9649	246447	521	400	146	134	12488	1	0	0	997.5	1992.98	2	1992.98	0	0	78.12	2.3e-07	R	NTFAEVTGLSPGVTYYFK	V			2_F80TXB20.7406.7406.2
3	F8W7G7	Uncharacterized protein OS=Homo sapiens GN=FN1 PE=4 SV=1	9649	246447	521	400	146	134	12489	1	0	0	997.5	1992.98	2	1992.98	0	0	84.13	5.7e-08	R	NTFAEVTGLSPGVTYYFK	V			F80CXA20_1.7468.7468.2
3	F8W7G7	Uncharacterized protein OS=Homo sapiens GN=FN1 PE=4 SV=1	9649	246447	521	400	146	134	12492	1	0	0	665.34	1992.99	3	1992.98	0	0	55.8	4.2e-05	R	NTFAEVTGLSPGVTYYFK	V			f69txa20.7038.7038.3
3	F8W7G7	Uncharacterized protein OS=Homo sapiens GN=FN1 PE=4 SV=1	9649	246447	521	400	146	134	12493	1	0	0	665.34	1992.99	3	1992.98	0	0	62.21	9.6e-06	R	NTFAEVTGLSPGVTYYFK	V			m84txa20.6778.6778.3
3	F8W7G7	Uncharacterized protein OS=Homo sapiens GN=FN1 PE=4 SV=1	9649	246447	521	400	146	134	12565	1	0	0	667.62	1999.84	3	1999.85	0	1	23.28	0.015	R	IGDQWDKQHDMGHMMR	C	Oxidation (M)	0.0000000000100000.0	F80CXA20_2.3100.3100.3
3	F8W7G7	Uncharacterized protein OS=Homo sapiens GN=FN1 PE=4 SV=1	9649	246447	521	400	146	134	12566	1	0	0	667.62	1999.84	3	1999.85	0	1	19.3	0.037	R	IGDQWDKQHDMGHMMR	C	Oxidation (M)	0.0000000000000100.0	2_F80CXA20_1.3133.3133.3
3	F8W7G7	Uncharacterized protein OS=Homo sapiens GN=FN1 PE=4 SV=1	9649	246447	521	400	146	134	13046	1	0	0	1024.42	2046.83	2	2046.83	0	0	62.7	5.4e-07	R	GFNCESKPEAEETCFDK	Y			m84cxa20.3491.3491.2
3	F8W7G7	Uncharacterized protein OS=Homo sapiens GN=FN1 PE=4 SV=1	9649	246447	521	400	146	134	13047	1	0	0	1024.42	2046.83	2	2046.83	0	0	46.88	2.1e-05	R	GFNCESKPEAEETCFDK	Y			2_F80TXA20.3712.3712.2
3	F8W7G7	Uncharacterized protein OS=Homo sapiens GN=FN1 PE=4 SV=1	9649	246447	521	400	146	134	13048	1	0	0	683.29	2046.83	3	2046.83	0	0	45.22	3e-05	R	GFNCESKPEAEETCFDK	Y			m84txb20.3137.3137.3
3	F8W7G7	Uncharacterized protein OS=Homo sapiens GN=FN1 PE=4 SV=1	9649	246447	521	400	146	134	13049	1	0	0	683.29	2046.83	3	2046.83	0	0	51.77	6.7e-06	R	GFNCESKPEAEETCFDK	Y			2_F80CXA20_1.3679.3679.3
3	F8W7G7	Uncharacterized protein OS=Homo sapiens GN=FN1 PE=4 SV=1	9649	246447	521	400	146	134	13250	1	0	0	692.29	2073.86	3	2073.85	0.01	1	49.82	1.7e-05	R	DNMKWCGTTQNYDADQK	F			2_F80CXA20_2.3689.3689.3
3	F8W7G7	Uncharacterized protein OS=Homo sapiens GN=FN1 PE=4 SV=1	9649	246447	521	400	146	134	13251	1	0	0	692.29	2073.86	3	2073.85	0.01	1	56.31	3.9e-06	R	DNMKWCGTTQNYDADQK	F			m84txb20.3161.3161.3
3	F8W7G7	Uncharacterized protein OS=Homo sapiens GN=FN1 PE=4 SV=1	9649	246447	521	400	146	134	13381	1	0	0	697.62	2089.85	3	2089.85	0	1	45.35	6e-05	R	DNMKWCGTTQNYDADQK	F	Oxidation (M)	0.00100000000000000.0	F80CXA20_1.3110.3110.3
3	F8W7G7	Uncharacterized protein OS=Homo sapiens GN=FN1 PE=4 SV=1	9649	246447	521	400	146	134	13382	1	0	0	697.62	2089.85	3	2089.85	0	1	40.57	0.00018	R	DNMKWCGTTQNYDADQK	F	Oxidation (M)	0.00100000000000000.0	2_F80CXA20_2.3089.3089.3
3	F8W7G7	Uncharacterized protein OS=Homo sapiens GN=FN1 PE=4 SV=1	9649	246447	521	400	146	134	13383	1	0	0	1045.93	2089.85	2	2089.85	0	1	19.09	0.025	R	DNMKWCGTTQNYDADQK	F	Oxidation (M)	0.00100000000000000.0	2_F80CXA20_2.3108.3108.2
3	F8W7G7	Uncharacterized protein OS=Homo sapiens GN=FN1 PE=4 SV=1	9649	246447	521	400	146	134	13556	1	0	0	706.38	2116.11	3	2116.11	0	0	59.48	1.1e-05	K	EINLAPDSSSVVVSGLMVATK	Y			f69cxb20_100930171645.6704.6704.3
3	F8W7G7	Uncharacterized protein OS=Homo sapiens GN=FN1 PE=4 SV=1	9649	246447	521	400	146	134	13557	1	0	0	706.38	2116.11	3	2116.11	0	0	46.72	0.0002	K	EINLAPDSSSVVVSGLMVATK	Y			f69cxb20.6718.6718.3
3	F8W7G7	Uncharacterized protein OS=Homo sapiens GN=FN1 PE=4 SV=1	9649	246447	521	400	146	134	13558	1	0	0	1059.06	2116.11	2	2116.11	0	0	76.21	2.4e-07	K	EINLAPDSSSVVVSGLMVATK	Y			f69txb20.6477.6477.2
3	F8W7G7	Uncharacterized protein OS=Homo sapiens GN=FN1 PE=4 SV=1	9649	246447	521	400	146	134	13559	1	0	0	1059.06	2116.11	2	2116.11	0	0	78.07	1.6e-07	K	EINLAPDSSSVVVSGLMVATK	Y			2_F80CXA20_1.7335.7335.2
3	F8W7G7	Uncharacterized protein OS=Homo sapiens GN=FN1 PE=4 SV=1	9649	246447	521	400	146	134	13560	1	0	0	1059.08	2116.14	2	2116.14	0	0	26.46	0.017	K	ESVPISDTIIPAVPPPTDLR	F			2_F80TXB20.7081.7081.2
3	F8W7G7	Uncharacterized protein OS=Homo sapiens GN=FN1 PE=4 SV=1	9649	246447	521	400	146	134	13561	1	0	0	1059.08	2116.14	2	2116.14	0	0	19.47	0.086	K	ESVPISDTIIPAVPPPTDLR	F			m84txb20.6358.6358.2
3	F8W7G7	Uncharacterized protein OS=Homo sapiens GN=FN1 PE=4 SV=1	9649	246447	521	400	146	134	13562	1	0	0	706.39	2116.14	3	2116.14	0	0	33.55	0.0033	K	ESVPISDTIIPAVPPPTDLR	F			F80CXA20_1.7121.7121.3
3	F8W7G7	Uncharacterized protein OS=Homo sapiens GN=FN1 PE=4 SV=1	9649	246447	521	400	146	134	13563	1	0	0	706.39	2116.14	3	2116.14	0	0	22.03	0.047	K	ESVPISDTIIPAVPPPTDLR	F			f69txa20.6702.6702.3
3	F8W7G7	Uncharacterized protein OS=Homo sapiens GN=FN1 PE=4 SV=1	9649	246447	521	400	146	134	13660	1	0	0	1067.06	2132.1	2	2132.1	0	0	58.27	1.9e-05	K	EINLAPDSSSVVVSGLMVATK	Y	Oxidation (M)	0.000000000000000010000.0	f69cxb20.6180.6180.2
3	F8W7G7	Uncharacterized protein OS=Homo sapiens GN=FN1 PE=4 SV=1	9649	246447	521	400	146	134	13661	1	0	0	1067.06	2132.1	2	2132.1	0	0	74.67	4.2e-07	K	EINLAPDSSSVVVSGLMVATK	Y	Oxidation (M)	0.000000000000000010000.0	2_F80TXA20.6840.6840.2
3	F8W7G7	Uncharacterized protein OS=Homo sapiens GN=FN1 PE=4 SV=1	9649	246447	521	400	146	134	13813	1	0	0	718.73	2153.17	3	2153.17	0	1	20.17	0.041	R	FLATTPNSLLVSWQPPRAR	I			F80CXA20_1.7207.7207.3
3	F8W7G7	Uncharacterized protein OS=Homo sapiens GN=FN1 PE=4 SV=1	9649	246447	521	400	146	134	13814	1	0	0	718.73	2153.17	3	2153.17	0	1	14.87	0.14	R	FLATTPNSLLVSWQPPRAR	I			2_F80CXA20_1.7191.7191.3
3	F8W7G7	Uncharacterized protein OS=Homo sapiens GN=FN1 PE=4 SV=1	9649	246447	521	400	146	134	13815	1	0	0	539.3	2153.18	4	2153.17	0	1	40.76	0.00036	R	FLATTPNSLLVSWQPPRAR	I			F80TXA20.7208.7208.4
3	F8W7G7	Uncharacterized protein OS=Homo sapiens GN=FN1 PE=4 SV=1	9649	246447	521	400	146	134	13816	1	0	0	539.3	2153.18	4	2153.17	0	1	0.78	3.6	R	FLATTPNSLLVSWQPPRAR	I			2_F80TXB20.7088.7088.4
3	F8W7G7	Uncharacterized protein OS=Homo sapiens GN=FN1 PE=4 SV=1	9649	246447	521	400	146	134	13926	1	0	0	723.35	2167.04	3	2167.04	0	0	7.61	1.7	R	ITYGETGGNSPVQEFTVPGSK	S			F80TXB20.4906.4906.3
3	F8W7G7	Uncharacterized protein OS=Homo sapiens GN=FN1 PE=4 SV=1	9649	246447	521	400	146	134	13928	1	0	0	723.36	2167.05	3	2167.04	0	0	36.93	0.0022	R	ITYGETGGNSPVQEFTVPGSK	S			f69cxb20_100930171645.5123.5123.3
3	F8W7G7	Uncharacterized protein OS=Homo sapiens GN=FN1 PE=4 SV=1	9649	246447	521	400	146	134	13929	1	0	0	723.36	2167.05	3	2167.04	0	0	37.34	0.002	R	ITYGETGGNSPVQEFTVPGSK	S			m84cxb20.4913.4913.3
3	F8W7G7	Uncharacterized protein OS=Homo sapiens GN=FN1 PE=4 SV=1	9649	246447	521	400	146	134	13930	1	0	0	1084.53	2167.05	2	2167.04	0	0	72.65	5.6e-07	R	ITYGETGGNSPVQEFTVPGSK	S			F80CXA20_2.5656.5656.2
3	F8W7G7	Uncharacterized protein OS=Homo sapiens GN=FN1 PE=4 SV=1	9649	246447	521	400	146	134	13931	1	0	0	1084.53	2167.05	2	2167.04	0	0	59.91	1.1e-05	R	ITYGETGGNSPVQEFTVPGSK	S			f69cxa20.5030.5030.2
3	F8W7G7	Uncharacterized protein OS=Homo sapiens GN=FN1 PE=4 SV=1	9649	246447	521	400	146	134	14007	1	0	0	545.25	2176.99	4	2176.98	0	0	1.79	5.5	R	RPHETGGYMLECVCLGNGK	G			f69txa20.4812.4812.4
3	F8W7G7	Uncharacterized protein OS=Homo sapiens GN=FN1 PE=4 SV=1	9649	246447	521	400	146	134	14008	1	0	0	545.25	2176.99	4	2176.98	0	0	11.38	0.61	R	RPHETGGYMLECVCLGNGK	G			f69cxb20.4712.4712.4
3	F8W7G7	Uncharacterized protein OS=Homo sapiens GN=FN1 PE=4 SV=1	9649	246447	521	400	146	134	14135	1	0	0	732	2192.98	3	2192.98	0	0	44.89	0.00023	R	RPHETGGYMLECVCLGNGK	G	Oxidation (M)	0.0000000010000000000.0	2_F80TXB20.4336.4336.3
3	F8W7G7	Uncharacterized protein OS=Homo sapiens GN=FN1 PE=4 SV=1	9649	246447	521	400	146	134	14136	1	0	0	732	2192.98	3	2192.98	0	0	41.06	0.00056	R	RPHETGGYMLECVCLGNGK	G	Oxidation (M)	0.0000000010000000000.0	2_F80TXA20.4440.4440.3
3	F8W7G7	Uncharacterized protein OS=Homo sapiens GN=FN1 PE=4 SV=1	9649	246447	521	400	146	134	14150	1	0	0	1098.61	2195.21	2	2195.22	-0.01	1	17.85	0.07	R	VDVIPVNLPGEHGQRLPISR	N			f69cxa20.5329.5329.2
3	F8W7G7	Uncharacterized protein OS=Homo sapiens GN=FN1 PE=4 SV=1	9649	246447	521	400	146	134	14151	1	0	0	549.81	2195.22	4	2195.22	0	1	2.65	1.9	R	VDVIPVNLPGEHGQRLPISR	N			f69cxa20_100930142853.5429.5429.4
3	F8W7G7	Uncharacterized protein OS=Homo sapiens GN=FN1 PE=4 SV=1	9649	246447	521	400	146	134	14152	2	0	0	549.81	2195.22	4	2195.22	0	1	1.75	2.3	R	VDVIPVNLPGEHGQRLPISR	N			f69txb20.5200.5200.4
3	F8W7G7	Uncharacterized protein OS=Homo sapiens GN=FN1 PE=4 SV=1	9649	246447	521	400	146	134	14153	1	0	0	732.75	2195.22	3	2195.22	0	1	10.77	0.29	R	VDVIPVNLPGEHGQRLPISR	N			f69cxb20.5421.5421.3
3	F8W7G7	Uncharacterized protein OS=Homo sapiens GN=FN1 PE=4 SV=1	9649	246447	521	400	146	134	14154	1	0	0	732.75	2195.22	3	2195.22	0	1	0.74	2.9	R	VDVIPVNLPGEHGQRLPISR	N			f69cxb20_100930171645.5447.5447.3
3	F8W7G7	Uncharacterized protein OS=Homo sapiens GN=FN1 PE=4 SV=1	9649	246447	521	400	146	134	14157	1	0	0	1098.97	2195.92	2	2195.92	0	0	60.38	3.2e-06	R	QDGHLWCSTTSNYEQDQK	Y			f69txb20.3310.3310.2
3	F8W7G7	Uncharacterized protein OS=Homo sapiens GN=FN1 PE=4 SV=1	9649	246447	521	400	146	134	14158	1	0	0	1098.97	2195.92	2	2195.92	0	0	47.26	6.5e-05	R	QDGHLWCSTTSNYEQDQK	Y			f69cxb20.3492.3492.2
3	F8W7G7	Uncharacterized protein OS=Homo sapiens GN=FN1 PE=4 SV=1	9649	246447	521	400	146	134	14159	1	0	0	732.98	2195.92	3	2195.92	0	0	60.25	3.3e-06	R	QDGHLWCSTTSNYEQDQK	Y			m84txb20.3355.3355.3
3	F8W7G7	Uncharacterized protein OS=Homo sapiens GN=FN1 PE=4 SV=1	9649	246447	521	400	146	134	14160	1	0	0	732.98	2195.92	3	2195.92	0	0	50.41	3.1e-05	R	QDGHLWCSTTSNYEQDQK	Y			f69cxa20.3337.3337.3
3	F8W7G7	Uncharacterized protein OS=Homo sapiens GN=FN1 PE=4 SV=1	9649	246447	521	400	146	134	15011	1	0	0	770.36	2308.05	3	2308.05	0	1	56.48	1.8e-05	K	CERHTSVQTTSSGSGPFTDVR	A			2_F80CXA20_1.3609.3609.3
3	F8W7G7	Uncharacterized protein OS=Homo sapiens GN=FN1 PE=4 SV=1	9649	246447	521	400	146	134	15012	1	0	0	770.36	2308.05	3	2308.05	0	1	56.34	1.8e-05	K	CERHTSVQTTSSGSGPFTDVR	A			F80CXA20_1.3608.3608.3
3	F8W7G7	Uncharacterized protein OS=Homo sapiens GN=FN1 PE=4 SV=1	9649	246447	521	400	146	134	15176	1	0	0	1166.99	2331.97	2	2331.97	0	1	25.23	0.0078	R	QGENGQMMSCTCLGNGKGEFK	C			2_F80CXA20_2.4279.4279.2
3	F8W7G7	Uncharacterized protein OS=Homo sapiens GN=FN1 PE=4 SV=1	9649	246447	521	400	146	134	15177	1	0	0	1166.99	2331.97	2	2331.97	0	1	3.11	1.3	R	QGENGQMMSCTCLGNGKGEFK	C			2_F80TXB20.4302.4302.2
3	F8W7G7	Uncharacterized protein OS=Homo sapiens GN=FN1 PE=4 SV=1	9649	246447	521	400	146	134	15178	1	0	0	778.34	2331.99	3	2331.97	0.02	1	46.45	9.4e-05	R	QGENGQMMSCTCLGNGKGEFK	C			2_F80TXA20.4311.4311.3
3	F8W7G7	Uncharacterized protein OS=Homo sapiens GN=FN1 PE=4 SV=1	9649	246447	521	400	146	134	15221	1	0	0	1169.62	2337.22	2	2337.23	-0.01	0	45.7	0.00024	K	DTLTSRPAQGVVTTLENVSPPR	R			m84cxa20.5935.5935.2
3	F8W7G7	Uncharacterized protein OS=Homo sapiens GN=FN1 PE=4 SV=1	9649	246447	521	400	146	134	15222	1	0	0	1169.62	2337.22	2	2337.23	-0.01	0	66.82	1.8e-06	K	DTLTSRPAQGVVTTLENVSPPR	R			f69cxb20.5622.5622.2
3	F8W7G7	Uncharacterized protein OS=Homo sapiens GN=FN1 PE=4 SV=1	9649	246447	521	400	146	134	15223	1	0	0	780.08	2337.23	3	2337.23	0	0	31.18	0.0061	K	DTLTSRPAQGVVTTLENVSPPR	R			f69cxb20_100930171645.5672.5672.3
3	F8W7G7	Uncharacterized protein OS=Homo sapiens GN=FN1 PE=4 SV=1	9649	246447	521	400	146	134	15224	1	0	0	780.08	2337.23	3	2337.23	0	0	19.61	0.088	K	DTLTSRPAQGVVTTLENVSPPR	R			m84cxb20.5444.5444.3
3	F8W7G7	Uncharacterized protein OS=Homo sapiens GN=FN1 PE=4 SV=1	9649	246447	521	400	146	134	15258	1	0	0	1172.1	2342.19	2	2342.19	0	0	17.91	0.18	K	TETITGFQVDAVPANGQTPIQR	T			f69cxb20_100930171645.5409.5409.2
3	F8W7G7	Uncharacterized protein OS=Homo sapiens GN=FN1 PE=4 SV=1	9649	246447	521	400	146	134	15259	1	0	0	1172.1	2342.19	2	2342.19	0	0	65.95	2.8e-06	K	TETITGFQVDAVPANGQTPIQR	T			f69txa20.5465.5465.2
3	F8W7G7	Uncharacterized protein OS=Homo sapiens GN=FN1 PE=4 SV=1	9649	246447	521	400	146	134	15260	1	0	0	781.74	2342.19	3	2342.19	0	0	44.85	0.00037	K	TETITGFQVDAVPANGQTPIQR	T			f69txa20.5534.5534.3
3	F8W7G7	Uncharacterized protein OS=Homo sapiens GN=FN1 PE=4 SV=1	9649	246447	521	400	146	134	15261	1	0	0	781.74	2342.19	3	2342.19	0	0	15.12	0.35	K	TETITGFQVDAVPANGQTPIQR	T			m84txa20.5379.5379.3
3	F8W7G7	Uncharacterized protein OS=Homo sapiens GN=FN1 PE=4 SV=1	9649	246447	521	400	146	134	15558	1	0	0	796.7	2387.07	3	2387.06	0.01	1	35.5	0.0016	R	CTCVGNGRGEWTCIAYSQLR	D			F80TXA20.5606.5606.3
3	F8W7G7	Uncharacterized protein OS=Homo sapiens GN=FN1 PE=4 SV=1	9649	246447	521	400	146	134	15559	1	0	0	796.7	2387.07	3	2387.06	0.01	1	47.8	9.6e-05	R	CTCVGNGRGEWTCIAYSQLR	D			F80TXB20.5627.5627.3
3	F8W7G7	Uncharacterized protein OS=Homo sapiens GN=FN1 PE=4 SV=1	9649	246447	521	400	146	134	15596	1	0	0	1198.55	2395.08	2	2395.08	0	0	24.26	0.025	R	RPGGEPSPEGTTGQSYNQYSQR	Y			m84txa20.2595.2595.2
3	F8W7G7	Uncharacterized protein OS=Homo sapiens GN=FN1 PE=4 SV=1	9649	246447	521	400	146	134	15597	1	0	0	1198.55	2395.08	2	2395.08	0	0	54.42	2.4e-05	R	RPGGEPSPEGTTGQSYNQYSQR	Y			F80TXA20.2884.2884.2
3	F8W7G7	Uncharacterized protein OS=Homo sapiens GN=FN1 PE=4 SV=1	9649	246447	521	400	146	134	15598	1	0	0	799.37	2395.08	3	2395.08	0	0	64.61	2.4e-06	R	RPGGEPSPEGTTGQSYNQYSQR	Y			F80CXA20_2.2901.2901.3
3	F8W7G7	Uncharacterized protein OS=Homo sapiens GN=FN1 PE=4 SV=1	9649	246447	521	400	146	134	15599	1	0	0	799.37	2395.08	3	2395.08	0	0	65.54	2e-06	R	RPGGEPSPEGTTGQSYNQYSQR	Y			2_F80CXA20_1.2930.2930.3
3	F8W7G7	Uncharacterized protein OS=Homo sapiens GN=FN1 PE=4 SV=1	9649	246447	521	400	146	134	15964	1	0	0	1231.61	2461.2	2	2461.2	0	0	29.95	0.013	R	TEIDKPSQMQVTDVQDNSISVK	W			m84cxb20.4057.4057.2
3	F8W7G7	Uncharacterized protein OS=Homo sapiens GN=FN1 PE=4 SV=1	9649	246447	521	400	146	134	15965	1	0	0	1231.61	2461.2	2	2461.2	0	0	42.83	0.00069	R	TEIDKPSQMQVTDVQDNSISVK	W			F80CXA20_2.4686.4686.2
3	F8W7G7	Uncharacterized protein OS=Homo sapiens GN=FN1 PE=4 SV=1	9649	246447	521	400	146	134	15966	1	0	0	821.41	2461.2	3	2461.2	0	0	40.63	0.0012	R	TEIDKPSQMQVTDVQDNSISVK	W			f69txa20.4321.4321.3
3	F8W7G7	Uncharacterized protein OS=Homo sapiens GN=FN1 PE=4 SV=1	9649	246447	521	400	146	134	15967	1	0	0	821.41	2461.2	3	2461.2	0	0	52.46	7.7e-05	R	TEIDKPSQMQVTDVQDNSISVK	W			m84txb20.4169.4169.3
3	F8W7G7	Uncharacterized protein OS=Homo sapiens GN=FN1 PE=4 SV=1	9649	246447	521	400	146	134	16025	1	0	0	824.1	2469.29	3	2469.31	-0.02	0	9.88	0.68	K	STATISGLKPGVDYTITVYAVTGR	G			2_F80CXA20_2.8589.8589.3
3	F8W7G7	Uncharacterized protein OS=Homo sapiens GN=FN1 PE=4 SV=1	9649	246447	521	400	146	134	16026	1	0	0	824.1	2469.29	3	2469.31	-0.02	0	8.43	0.95	K	STATISGLKPGVDYTITVYAVTGR	G			2_F80CXA20_1.8638.8638.3
3	F8W7G7	Uncharacterized protein OS=Homo sapiens GN=FN1 PE=4 SV=1	9649	246447	521	400	146	134	16027	1	0	0	618.33	2469.3	4	2469.31	-0.01	0	1.97	4.5	K	STATISGLKPGVDYTITVYAVTGR	G			2_F80CXA20_1.6824.6824.4
3	F8W7G7	Uncharacterized protein OS=Homo sapiens GN=FN1 PE=4 SV=1	9649	246447	521	400	146	134	16028	1	0	0	1235.66	2469.31	2	2469.31	0	0	70.56	5.7e-07	K	STATISGLKPGVDYTITVYAVTGR	G			2_F80CXA20_1.6802.6802.2
3	F8W7G7	Uncharacterized protein OS=Homo sapiens GN=FN1 PE=4 SV=1	9649	246447	521	400	146	134	16029	1	0	0	1235.66	2469.31	2	2469.31	0	0	69.45	7.3e-07	K	STATISGLKPGVDYTITVYAVTGR	G			2_F80CXA20_2.6805.6805.2
3	F8W7G7	Uncharacterized protein OS=Homo sapiens GN=FN1 PE=4 SV=1	9649	246447	521	400	146	134	16030	1	0	0	824.11	2469.32	3	2469.31	0	0	30.48	0.0058	K	STATISGLKPGVDYTITVYAVTGR	G			2_F80TXA20.6891.6891.3
3	F8W7G7	Uncharacterized protein OS=Homo sapiens GN=FN1 PE=4 SV=1	9649	246447	521	400	146	134	16031	1	0	0	824.11	2469.32	3	2469.31	0	0	34.96	0.0021	K	STATISGLKPGVDYTITVYAVTGR	G			m84cxa20.6560.6560.3
3	F8W7G7	Uncharacterized protein OS=Homo sapiens GN=FN1 PE=4 SV=1	9649	246447	521	400	146	134	16038	1	0	0	1237.15	2472.29	2	2472.29	0	1	72.65	5.3e-07	R	NLQPASEYTVSLVAIKGNQESPK	A			2_F80TXA20.5862.5862.2
3	F8W7G7	Uncharacterized protein OS=Homo sapiens GN=FN1 PE=4 SV=1	9649	246447	521	400	146	134	16039	1	0	0	1237.15	2472.29	2	2472.29	0	1	73.38	4.5e-07	R	NLQPASEYTVSLVAIKGNQESPK	A			F80TXA20.5783.5783.2
3	F8W7G7	Uncharacterized protein OS=Homo sapiens GN=FN1 PE=4 SV=1	9649	246447	521	400	146	134	16040	1	0	0	825.1	2472.29	3	2472.29	0	1	23.65	0.041	R	NLQPASEYTVSLVAIKGNQESPK	A			m84cxa20.5543.5543.3
3	F8W7G7	Uncharacterized protein OS=Homo sapiens GN=FN1 PE=4 SV=1	9649	246447	521	400	146	134	16041	1	0	0	825.1	2472.29	3	2472.29	0	1	14.87	0.31	R	NLQPASEYTVSLVAIKGNQESPK	A			2_F80TXB20.5711.5711.3
3	F8W7G7	Uncharacterized protein OS=Homo sapiens GN=FN1 PE=4 SV=1	9649	246447	521	400	146	134	16049	1	0	0	1238.16	2474.3	2	2474.29	0.01	1	23.75	0.029	K	DDKESVPISDTIIPAVPPPTDLR	F			2_F80TXB20.6874.6874.2
3	F8W7G7	Uncharacterized protein OS=Homo sapiens GN=FN1 PE=4 SV=1	9649	246447	521	400	146	134	16050	1	0	0	1238.16	2474.3	2	2474.29	0.01	1	47.38	0.00012	K	DDKESVPISDTIIPAVPPPTDLR	F			2_F80TXA20.6979.6979.2
3	F8W7G7	Uncharacterized protein OS=Homo sapiens GN=FN1 PE=4 SV=1	9649	246447	521	400	146	134	16083	1	0	0	826.74	2477.2	3	2477.2	0	0	43.52	0.0005	R	TEIDKPSQMQVTDVQDNSISVK	W	Oxidation (M)	0.0000000010000000000000.0	2_F80TXB20.4033.4033.3
3	F8W7G7	Uncharacterized protein OS=Homo sapiens GN=FN1 PE=4 SV=1	9649	246447	521	400	146	134	16084	1	0	0	826.74	2477.2	3	2477.2	0	0	30.46	0.01	R	TEIDKPSQMQVTDVQDNSISVK	W	Oxidation (M)	0.0000000010000000000000.0	m84txb20.3519.3519.3
3	F8W7G7	Uncharacterized protein OS=Homo sapiens GN=FN1 PE=4 SV=1	9649	246447	521	400	146	134	16175	1	0	0	1247.56	2493.11	2	2493.11	0	0	69.98	4.3e-07	R	TNTNVNCPIECFMPLDVQADR	E			2_F80TXA20.7487.7487.2
3	F8W7G7	Uncharacterized protein OS=Homo sapiens GN=FN1 PE=4 SV=1	9649	246447	521	400	146	134	16176	1	0	0	1247.56	2493.11	2	2493.11	0	0	58.85	5.5e-06	R	TNTNVNCPIECFMPLDVQADR	E			2_F80CXA20_1.7407.7407.2
3	F8W7G7	Uncharacterized protein OS=Homo sapiens GN=FN1 PE=4 SV=1	9649	246447	521	400	146	134	16177	1	0	0	832.04	2493.11	3	2493.11	0	0	55.21	1.3e-05	R	TNTNVNCPIECFMPLDVQADR	E			F80CXA20_2.7372.7372.3
3	F8W7G7	Uncharacterized protein OS=Homo sapiens GN=FN1 PE=4 SV=1	9649	246447	521	400	146	134	16178	1	0	0	832.04	2493.11	3	2493.11	0	0	14.73	0.15	R	TNTNVNCPIECFMPLDVQADR	E			m84cxa20.7162.7162.3
3	F8W7G7	Uncharacterized protein OS=Homo sapiens GN=FN1 PE=4 SV=1	9649	246447	521	400	146	134	16184	1	0	0	499.67	2493.33	5	2493.33	0	1	19.58	0.075	K	DTLTSRPAQGVVTTLENVSPPRR	A			2_F80CXA20_1.5832.5832.5
3	F8W7G7	Uncharacterized protein OS=Homo sapiens GN=FN1 PE=4 SV=1	9649	246447	521	400	146	134	16185	1	0	0	499.67	2493.33	5	2493.33	0	1	12.33	0.4	K	DTLTSRPAQGVVTTLENVSPPRR	A			f69cxa20.5190.5190.5
3	F8W7G7	Uncharacterized protein OS=Homo sapiens GN=FN1 PE=4 SV=1	9649	246447	521	400	146	134	16186	1	0	0	832.12	2493.33	3	2493.33	0	1	17.67	0.12	K	DTLTSRPAQGVVTTLENVSPPRR	A			f69cxb20.5268.5268.3
3	F8W7G7	Uncharacterized protein OS=Homo sapiens GN=FN1 PE=4 SV=1	9649	246447	521	400	146	134	16187	1	0	0	832.12	2493.33	3	2493.33	0	1	18.78	0.091	K	DTLTSRPAQGVVTTLENVSPPRR	A			f69cxb20_100930171645.5236.5236.3
3	F8W7G7	Uncharacterized protein OS=Homo sapiens GN=FN1 PE=4 SV=1	9649	246447	521	400	146	134	16188	1	0	0	624.34	2493.33	4	2493.33	0	1	47.05	0.00014	K	DTLTSRPAQGVVTTLENVSPPRR	A			f69cxa20.5158.5158.4
3	F8W7G7	Uncharacterized protein OS=Homo sapiens GN=FN1 PE=4 SV=1	9649	246447	521	400	146	134	16189	1	0	0	624.34	2493.33	4	2493.33	0	1	30.89	0.0056	K	DTLTSRPAQGVVTTLENVSPPRR	A			m84cxa20.5559.5559.4
3	F8W7G7	Uncharacterized protein OS=Homo sapiens GN=FN1 PE=4 SV=1	9649	246447	521	400	146	134	16373	1	0	0	631.85	2523.36	4	2523.36	0	0	73.35	2.5e-07	R	DLEVVAATPTSLLISWDAPAVTVR	Y			F80CXA20_2.8622.8622.4
3	F8W7G7	Uncharacterized protein OS=Homo sapiens GN=FN1 PE=4 SV=1	9649	246447	521	400	146	134	16374	1	0	0	631.85	2523.36	4	2523.36	0	0	52.73	2.9e-05	R	DLEVVAATPTSLLISWDAPAVTVR	Y			f69txb20.7782.7782.4
3	F8W7G7	Uncharacterized protein OS=Homo sapiens GN=FN1 PE=4 SV=1	9649	246447	521	400	146	134	16375	1	0	0	842.13	2523.36	3	2523.36	0	0	32.42	0.0031	R	DLEVVAATPTSLLISWDAPAVTVR	Y			m84txb20.7953.7953.3
3	F8W7G7	Uncharacterized protein OS=Homo sapiens GN=FN1 PE=4 SV=1	9649	246447	521	400	146	134	16376	1	0	0	842.13	2523.36	3	2523.36	0	0	35.51	0.0015	R	DLEVVAATPTSLLISWDAPAVTVR	Y			f69cxa20_100930142853.8007.8007.3
3	F8W7G7	Uncharacterized protein OS=Homo sapiens GN=FN1 PE=4 SV=1	9649	246447	521	400	146	134	16377	1	0	0	1262.69	2523.36	2	2523.36	0	0	59.58	5.9e-06	R	DLEVVAATPTSLLISWDAPAVTVR	Y			m84txb20.7979.7979.2
3	F8W7G7	Uncharacterized protein OS=Homo sapiens GN=FN1 PE=4 SV=1	9649	246447	521	400	146	134	16378	1	0	0	1262.69	2523.36	2	2523.36	0	0	47.58	9.4e-05	R	DLEVVAATPTSLLISWDAPAVTVR	Y			m84txa20.7925.7925.2
3	F8W7G7	Uncharacterized protein OS=Homo sapiens GN=FN1 PE=4 SV=1	9649	246447	521	400	146	134	16408	1	0	0	1266.69	2531.36	2	2531.36	0	0	70.66	3.4e-07	R	NSITLTNLTPGTEYVVSIVALNGR	E			f69cxb20_100930171645.7618.7618.2
3	F8W7G7	Uncharacterized protein OS=Homo sapiens GN=FN1 PE=4 SV=1	9649	246447	521	400	146	134	16409	1	0	0	1266.69	2531.36	2	2531.36	0	0	78.66	5.4e-08	R	NSITLTNLTPGTEYVVSIVALNGR	E			f69txa20.7901.7901.2
3	F8W7G7	Uncharacterized protein OS=Homo sapiens GN=FN1 PE=4 SV=1	9649	246447	521	400	146	134	16410	1	0	0	844.79	2531.36	3	2531.36	0	0	49.74	4.6e-05	R	NSITLTNLTPGTEYVVSIVALNGR	E			f69txa20.7910.7910.3
3	F8W7G7	Uncharacterized protein OS=Homo sapiens GN=FN1 PE=4 SV=1	9649	246447	521	400	146	134	16411	1	0	0	844.79	2531.36	3	2531.36	0	0	38.97	0.00055	R	NSITLTNLTPGTEYVVSIVALNGR	E			f69cxb20_100930171645.7593.7593.3
3	F8W7G7	Uncharacterized protein OS=Homo sapiens GN=FN1 PE=4 SV=1	9649	246447	521	400	146	134	16655	1	0	0	643.84	2571.33	4	2571.33	0	1	31.66	0.0061	R	TKTETITGFQVDAVPANGQTPIQR	T			F80CXA20_2.5437.5437.4
3	F8W7G7	Uncharacterized protein OS=Homo sapiens GN=FN1 PE=4 SV=1	9649	246447	521	400	146	134	16656	1	0	0	643.84	2571.33	4	2571.33	0	1	39.61	0.00097	R	TKTETITGFQVDAVPANGQTPIQR	T			2_F80CXA20_2.5454.5454.4
3	F8W7G7	Uncharacterized protein OS=Homo sapiens GN=FN1 PE=4 SV=1	9649	246447	521	400	146	134	16657	1	0	0	1286.67	2571.33	2	2571.33	0	1	24.73	0.028	R	TKTETITGFQVDAVPANGQTPIQR	T			2_F80TXA20.5584.5584.2
3	F8W7G7	Uncharacterized protein OS=Homo sapiens GN=FN1 PE=4 SV=1	9649	246447	521	400	146	134	16658	1	0	0	1286.67	2571.33	2	2571.33	0	1	16.16	0.2	R	TKTETITGFQVDAVPANGQTPIQR	T			m84txb20.4919.4919.2
3	F8W7G7	Uncharacterized protein OS=Homo sapiens GN=FN1 PE=4 SV=1	9649	246447	521	400	146	134	16877	1	0	0	1310.56	2619.1	2	2619.1	0	0	62.74	7.7e-07	K	FGFCPMAAHEEICTTNEGVMYR	I			2_F80TXB20.6207.6207.2
3	F8W7G7	Uncharacterized protein OS=Homo sapiens GN=FN1 PE=4 SV=1	9649	246447	521	400	146	134	16878	1	0	0	1310.56	2619.1	2	2619.1	0	0	87.98	2.3e-09	K	FGFCPMAAHEEICTTNEGVMYR	I			F80TXA20.6243.6243.2
3	F8W7G7	Uncharacterized protein OS=Homo sapiens GN=FN1 PE=4 SV=1	9649	246447	521	400	146	134	16879	1	0	0	874.04	2619.1	3	2619.1	0	0	44.57	5.1e-05	K	FGFCPMAAHEEICTTNEGVMYR	I			f69txa20.5816.5816.3
3	F8W7G7	Uncharacterized protein OS=Homo sapiens GN=FN1 PE=4 SV=1	9649	246447	521	400	146	134	16880	1	0	0	874.04	2619.1	3	2619.1	0	0	56.87	3e-06	K	FGFCPMAAHEEICTTNEGVMYR	I			f69txb20.5476.5476.3
3	F8W7G7	Uncharacterized protein OS=Homo sapiens GN=FN1 PE=4 SV=1	9649	246447	521	400	146	134	16929	1	0	0	879.37	2635.1	3	2635.1	0	0	35.89	0.00036	K	FGFCPMAAHEEICTTNEGVMYR	I	Oxidation (M)	0.0000010000000000000000.0	2_F80CXA20_2.5789.5789.3
3	F8W7G7	Uncharacterized protein OS=Homo sapiens GN=FN1 PE=4 SV=1	9649	246447	521	400	146	134	16930	1	0	0	879.37	2635.1	3	2635.1	0	0	50.67	1.2e-05	K	FGFCPMAAHEEICTTNEGVMYR	I	Oxidation (M)	0.0000000000000000000100.0	2_F80CXA20_1.5911.5911.3
3	F8W7G7	Uncharacterized protein OS=Homo sapiens GN=FN1 PE=4 SV=1	9649	246447	521	400	146	134	16967	1	0	0	1325.64	2649.27	2	2649.27	0	1	24.42	0.035	R	YYRITYGETGGNSPVQEFTVPGSK	S			2_F80CXA20_1.5882.5882.2
3	F8W7G7	Uncharacterized protein OS=Homo sapiens GN=FN1 PE=4 SV=1	9649	246447	521	400	146	134	16968	1	0	0	884.1	2649.27	3	2649.27	0	1	24.14	0.037	R	YYRITYGETGGNSPVQEFTVPGSK	S			f69txb20.5130.5130.3
3	F8W7G7	Uncharacterized protein OS=Homo sapiens GN=FN1 PE=4 SV=1	9649	246447	521	400	146	134	16969	1	0	0	884.1	2649.27	3	2649.27	0	1	57.31	1.8e-05	R	YYRITYGETGGNSPVQEFTVPGSK	S			2_F80TXA20.5931.5931.3
3	F8W7G7	Uncharacterized protein OS=Homo sapiens GN=FN1 PE=4 SV=1	9649	246447	521	400	146	134	17095	1	0	0	672.56	2686.2	4	2686.19	0	1	13.39	0.19	R	VGDTYERPKDSMIWDCTCIGAGR	G			f69cxb20_100930171645.4990.4990.4
3	F8W7G7	Uncharacterized protein OS=Homo sapiens GN=FN1 PE=4 SV=1	9649	246447	521	400	146	134	17096	1	0	0	672.56	2686.2	4	2686.19	0	1	13.6	0.18	R	VGDTYERPKDSMIWDCTCIGAGR	G			f69txa20.4992.4992.4
3	F8W7G7	Uncharacterized protein OS=Homo sapiens GN=FN1 PE=4 SV=1	9649	246447	521	400	146	134	17097	1	0	0	1344.11	2686.2	2	2686.19	0.01	1	12.44	0.22	R	VGDTYERPKDSMIWDCTCIGAGR	G			F80TXB20.5427.5427.2
3	F8W7G7	Uncharacterized protein OS=Homo sapiens GN=FN1 PE=4 SV=1	9649	246447	521	400	146	134	17098	1	0	0	1344.11	2686.2	2	2686.19	0.01	1	22.64	0.021	R	VGDTYERPKDSMIWDCTCIGAGR	G			F80TXA20.5408.5408.2
3	F8W7G7	Uncharacterized protein OS=Homo sapiens GN=FN1 PE=4 SV=1	9649	246447	521	400	146	134	17110	1	0	0	673.85	2691.36	4	2691.37	0	0	43.76	0.00038	K	FTQVTPTSLSAQWTPPNVQLTGYR	V			F80TXB20.7200.7200.4
3	F8W7G7	Uncharacterized protein OS=Homo sapiens GN=FN1 PE=4 SV=1	9649	246447	521	400	146	134	17111	1	0	0	1346.69	2691.37	2	2691.37	0	0	43.83	0.00037	K	FTQVTPTSLSAQWTPPNVQLTGYR	V			2_F80TXA20.7247.7247.2
3	F8W7G7	Uncharacterized protein OS=Homo sapiens GN=FN1 PE=4 SV=1	9649	246447	521	400	146	134	17112	1	0	0	1346.69	2691.37	2	2691.37	0	0	70.54	7.8e-07	K	FTQVTPTSLSAQWTPPNVQLTGYR	V			f69txa20.6732.6732.2
3	F8W7G7	Uncharacterized protein OS=Homo sapiens GN=FN1 PE=4 SV=1	9649	246447	521	400	146	134	17113	1	0	0	898.13	2691.37	3	2691.37	0	0	5.85	2.3	K	FTQVTPTSLSAQWTPPNVQLTGYR	V			2_F80CXA20_1.6810.6810.3
3	F8W7G7	Uncharacterized protein OS=Homo sapiens GN=FN1 PE=4 SV=1	9649	246447	521	400	146	134	17114	1	0	0	898.13	2691.37	3	2691.37	0	0	43.38	0.00039	K	FTQVTPTSLSAQWTPPNVQLTGYR	V			2_F80TXA20.7246.7246.3
3	F8W7G7	Uncharacterized protein OS=Homo sapiens GN=FN1 PE=4 SV=1	9649	246447	521	400	146	134	17115	1	0	0	898.13	2691.37	3	2691.37	0	0	42.68	0.00046	K	FTQVTPTSLSAQWTPPNVQLTGYR	V			F80CXA20_2.7140.7140.3
3	F8W7G7	Uncharacterized protein OS=Homo sapiens GN=FN1 PE=4 SV=1	9649	246447	521	400	146	134	17141	1	0	0	901.74	2702.19	3	2702.19	0	1	28.82	0.0044	R	VGDTYERPKDSMIWDCTCIGAGR	G	Oxidation (M)	0.00000000000100000000000.0	f69txa20.4486.4486.3
3	F8W7G7	Uncharacterized protein OS=Homo sapiens GN=FN1 PE=4 SV=1	9649	246447	521	400	146	134	17142	1	0	0	901.74	2702.19	3	2702.19	0	1	33.22	0.0016	R	VGDTYERPKDSMIWDCTCIGAGR	G	Oxidation (M)	0.00000000000100000000000.0	f69cxa20.4261.4261.3
3	F8W7G7	Uncharacterized protein OS=Homo sapiens GN=FN1 PE=4 SV=1	9649	246447	521	400	146	134	17143	1	0	0	676.55	2702.19	4	2702.19	0	1	13.92	0.14	R	VGDTYERPKDSMIWDCTCIGAGR	G	Oxidation (M)	0.00000000000100000000000.0	2_F80CXA20_1.4877.4877.4
3	F8W7G7	Uncharacterized protein OS=Homo sapiens GN=FN1 PE=4 SV=1	9649	246447	521	400	146	134	17144	1	0	0	676.55	2702.19	4	2702.19	0	1	14.46	0.12	R	VGDTYERPKDSMIWDCTCIGAGR	G	Oxidation (M)	0.00000000000100000000000.0	2_F80CXA20_2.4874.4874.4
3	F8W7G7	Uncharacterized protein OS=Homo sapiens GN=FN1 PE=4 SV=1	9649	246447	521	400	146	134	17504	1	0	0	700.63	2798.48	4	2798.47	0	0	48.94	8.2e-05	K	GLKPGVVYEGQLISIQQYGHQEVTR	F			2_F80TXB20.5846.5846.4
3	F8W7G7	Uncharacterized protein OS=Homo sapiens GN=FN1 PE=4 SV=1	9649	246447	521	400	146	134	17505	1	0	0	700.63	2798.48	4	2798.47	0	0	60.36	5.9e-06	K	GLKPGVVYEGQLISIQQYGHQEVTR	F			F80TXB20.5907.5907.4
3	F8W7G7	Uncharacterized protein OS=Homo sapiens GN=FN1 PE=4 SV=1	9649	246447	521	400	146	134	17506	1	0	0	933.83	2798.48	3	2798.47	0	0	53.17	3.1e-05	K	GLKPGVVYEGQLISIQQYGHQEVTR	F			F80CXA20_2.5892.5892.3
3	F8W7G7	Uncharacterized protein OS=Homo sapiens GN=FN1 PE=4 SV=1	9649	246447	521	400	146	134	17507	1	0	0	933.83	2798.48	3	2798.47	0	0	66.13	1.5e-06	K	GLKPGVVYEGQLISIQQYGHQEVTR	F			F80TXB20.5912.5912.3
3	F8W7G7	Uncharacterized protein OS=Homo sapiens GN=FN1 PE=4 SV=1	9649	246447	521	400	146	134	17599	1	0	0	565.64	2823.17	5	2823.17	0	1	20.49	0.015	K	CDPHEATCYDDGKTYHVGEQWQK	E			m84cxa20.3486.3486.5
3	F8W7G7	Uncharacterized protein OS=Homo sapiens GN=FN1 PE=4 SV=1	9649	246447	521	400	146	134	17600	1	0	0	565.64	2823.17	5	2823.17	0	1	21.91	0.011	K	CDPHEATCYDDGKTYHVGEQWQK	E			F80CXA20_1.3672.3672.5
3	F8W7G7	Uncharacterized protein OS=Homo sapiens GN=FN1 PE=4 SV=1	9649	246447	521	400	146	134	17601	1	0	0	942.06	2823.17	3	2823.17	0	1	15.42	0.047	K	CDPHEATCYDDGKTYHVGEQWQK	E			2_F80CXA20_2.3669.3669.3
3	F8W7G7	Uncharacterized protein OS=Homo sapiens GN=FN1 PE=4 SV=1	9649	246447	521	400	146	134	17602	1	0	0	942.06	2823.17	3	2823.17	0	1	15.19	0.05	K	CDPHEATCYDDGKTYHVGEQWQK	E			2_F80TXA20.3707.3707.3
3	F8W7G7	Uncharacterized protein OS=Homo sapiens GN=FN1 PE=4 SV=1	9649	246447	521	400	146	134	17677	1	0	0	949.82	2846.44	3	2846.44	0	1	51.21	5.9e-05	R	NTFAEVTGLSPGVTYYFKVFAVSHGR	E			2_F80TXA20.8033.8033.3
3	F8W7G7	Uncharacterized protein OS=Homo sapiens GN=FN1 PE=4 SV=1	9649	246447	521	400	146	134	17679	1	0	0	712.62	2846.44	4	2846.44	0	1	27.4	0.014	R	NTFAEVTGLSPGVTYYFKVFAVSHGR	E			F80CXA20_1.7921.7921.4
3	F8W7G7	Uncharacterized protein OS=Homo sapiens GN=FN1 PE=4 SV=1	9649	246447	521	400	146	134	17680	1	0	0	712.62	2846.44	4	2846.44	0	1	1.89	5.1	R	NTFAEVTGLSPGVTYYFKVFAVSHGR	E			f69txa20.7683.7683.4
3	F8W7G7	Uncharacterized protein OS=Homo sapiens GN=FN1 PE=4 SV=1	9649	246447	521	400	146	134	17689	1	0	0	950.12	2847.34	3	2847.33	0.01	0	39.09	0.001	R	QAQQMVQPQSPVAVSQSKPGCYDNGK	H	Oxidation (M)	0.00001000000000000000000000.0	2_F80CXA20_1.3516.3516.3
3	F8W7G7	Uncharacterized protein OS=Homo sapiens GN=FN1 PE=4 SV=1	9649	246447	521	400	146	134	17690	1	0	0	950.12	2847.34	3	2847.33	0.01	0	49.69	8.8e-05	R	QAQQMVQPQSPVAVSQSKPGCYDNGK	H	Oxidation (M)	0.00001000000000000000000000.0	F80CXA20_2.3475.3475.3
3	F8W7G7	Uncharacterized protein OS=Homo sapiens GN=FN1 PE=4 SV=1	9649	246447	521	400	146	134	17750	1	0	0	1433.08	2864.14	2	2864.15	-0.02	0	40.64	8.6e-05	K	CDPVDQCQDSETGTFYQIGDSWEK	Y			f69txa20.6040.6040.2
3	F8W7G7	Uncharacterized protein OS=Homo sapiens GN=FN1 PE=4 SV=1	9649	246447	521	400	146	134	17751	1	0	0	1433.08	2864.14	2	2864.15	-0.02	0	71.3	7.4e-08	K	CDPVDQCQDSETGTFYQIGDSWEK	Y			F80TXB20.6470.6470.2
3	F8W7G7	Uncharacterized protein OS=Homo sapiens GN=FN1 PE=4 SV=1	9649	246447	521	400	146	134	17752	1	0	0	955.72	2864.15	3	2864.15	0	0	68.85	1.3e-07	K	CDPVDQCQDSETGTFYQIGDSWEK	Y			F80TXB20.6464.6464.3
3	F8W7G7	Uncharacterized protein OS=Homo sapiens GN=FN1 PE=4 SV=1	9649	246447	521	400	146	134	17753	1	0	0	955.72	2864.15	3	2864.15	0	0	29.37	0.0012	K	CDPVDQCQDSETGTFYQIGDSWEK	Y			f69cxb20.5886.5886.3
3	F8W7G7	Uncharacterized protein OS=Homo sapiens GN=FN1 PE=4 SV=1	9649	246447	521	400	146	134	17800	1	0	0	960.81	2879.41	3	2879.43	-0.03	1	47.29	0.0002	R	SYTITGLQPGTDYKIYLYTLNDNAR	S			2_F80CXA20_2.7140.7140.3
3	F8W7G7	Uncharacterized protein OS=Homo sapiens GN=FN1 PE=4 SV=1	9649	246447	521	400	146	134	17801	1	0	0	960.81	2879.41	3	2879.43	-0.03	1	64.22	4e-06	R	SYTITGLQPGTDYKIYLYTLNDNAR	S			F80TXB20.7138.7138.3
3	F8W7G7	Uncharacterized protein OS=Homo sapiens GN=FN1 PE=4 SV=1	9649	246447	521	400	146	134	17802	1	0	0	1440.72	2879.43	2	2879.43	0	1	34.99	0.003	R	SYTITGLQPGTDYKIYLYTLNDNAR	S			F80CXA20_1.7147.7147.2
3	F8W7G7	Uncharacterized protein OS=Homo sapiens GN=FN1 PE=4 SV=1	9649	246447	521	400	146	134	17803	1	0	0	1440.72	2879.43	2	2879.43	0	1	54.78	3.1e-05	R	SYTITGLQPGTDYKIYLYTLNDNAR	S			2_F80CXA20_2.7128.7128.2
3	F8W7G7	Uncharacterized protein OS=Homo sapiens GN=FN1 PE=4 SV=1	9649	246447	521	400	146	134	17892	1	0	0	968.41	2902.22	3	2902.22	0.01	1	54.26	6e-06	R	GFNCESKPEAEETCFDKYTGNTYR	V			F80CXA20_2.4435.4435.3
3	F8W7G7	Uncharacterized protein OS=Homo sapiens GN=FN1 PE=4 SV=1	9649	246447	521	400	146	134	17893	1	0	0	968.41	2902.22	3	2902.22	0.01	1	51.06	1.3e-05	R	GFNCESKPEAEETCFDKYTGNTYR	V			f69cxb20_100930171645.3978.3978.3
3	F8W7G7	Uncharacterized protein OS=Homo sapiens GN=FN1 PE=4 SV=1	9649	246447	521	400	146	134	17894	1	0	0	1452.12	2902.22	2	2902.22	0.01	1	33.91	0.00065	R	GFNCESKPEAEETCFDKYTGNTYR	V			f69cxa20.3883.3883.2
3	F8W7G7	Uncharacterized protein OS=Homo sapiens GN=FN1 PE=4 SV=1	9649	246447	521	400	146	134	17895	1	0	0	1452.12	2902.22	2	2902.22	0.01	1	45.3	4.7e-05	R	GFNCESKPEAEETCFDKYTGNTYR	V			F80CXA20_1.4499.4499.2
3	F8W7G7	Uncharacterized protein OS=Homo sapiens GN=FN1 PE=4 SV=1	9649	246447	521	400	146	134	17896	1	0	0	726.56	2902.22	4	2902.22	0.01	1	41.31	0.00012	R	GFNCESKPEAEETCFDKYTGNTYR	V			m84cxa20.4229.4229.4
3	F8W7G7	Uncharacterized protein OS=Homo sapiens GN=FN1 PE=4 SV=1	9649	246447	521	400	146	134	17897	1	0	0	726.56	2902.22	4	2902.22	0.01	1	22.74	0.0085	R	GFNCESKPEAEETCFDKYTGNTYR	V			F80CXA20_2.4434.4434.4
3	F8W7G7	Uncharacterized protein OS=Homo sapiens GN=FN1 PE=4 SV=1	9649	246447	521	400	146	134	17965	1	0	0	973.48	2917.42	3	2917.42	0	0	49.47	7.8e-05	K	TGLDSPTGIDFSDITANSFTVHWIAPR	A			f69cxb20.7499.7499.3
3	F8W7G7	Uncharacterized protein OS=Homo sapiens GN=FN1 PE=4 SV=1	9649	246447	521	400	146	134	18079	1	0	0	983.19	2946.53	3	2946.54	0	1	44.29	0.00023	K	FTQVTPTSLSAQWTPPNVQLTGYRVR	V			2_F80TXB20.6911.6911.3
3	F8W7G7	Uncharacterized protein OS=Homo sapiens GN=FN1 PE=4 SV=1	9649	246447	521	400	146	134	18080	1	0	0	983.19	2946.53	3	2946.54	0	1	56.17	1.5e-05	K	FTQVTPTSLSAQWTPPNVQLTGYRVR	V			F80TXA20.6960.6960.3
3	F8W7G7	Uncharacterized protein OS=Homo sapiens GN=FN1 PE=4 SV=1	9649	246447	521	400	146	134	18162	1	0	0	1484.78	2967.54	2	2967.54	0	0	47.95	0.00011	R	EVTSDSGSIVVSGLTPGVEYVYTIQVLR	D			2_F80TXA20.8328.8328.2
3	F8W7G7	Uncharacterized protein OS=Homo sapiens GN=FN1 PE=4 SV=1	9649	246447	521	400	146	134	18163	1	0	0	1484.78	2967.54	2	2967.54	0	0	78.85	8.6e-08	R	EVTSDSGSIVVSGLTPGVEYVYTIQVLR	D			F80TXB20.8299.8299.2
3	F8W7G7	Uncharacterized protein OS=Homo sapiens GN=FN1 PE=4 SV=1	9649	246447	521	400	146	134	18164	1	0	0	990.19	2967.55	3	2967.54	0	0	7.81	1.1	R	EVTSDSGSIVVSGLTPGVEYVYTIQVLR	D			m84cxb20.7268.7268.3
3	F8W7G7	Uncharacterized protein OS=Homo sapiens GN=FN1 PE=4 SV=1	9649	246447	521	400	146	134	18165	1	0	0	990.19	2967.55	3	2967.54	0	0	22.85	0.034	R	EVTSDSGSIVVSGLTPGVEYVYTIQVLR	D			f69txb20.7377.7377.3
3	F8W7G7	Uncharacterized protein OS=Homo sapiens GN=FN1 PE=4 SV=1	9649	246447	521	400	146	134	18275	1	0	0	1002.87	3005.59	3	3005.59	0	1	24.53	0.02	R	DLEVVAATPTSLLISWDAPAVTVRYYR	I			F80CXA20_1.8557.8557.3
3	F8W7G7	Uncharacterized protein OS=Homo sapiens GN=FN1 PE=4 SV=1	9649	246447	521	400	146	134	18276	1	0	0	1002.87	3005.59	3	3005.59	0	1	28.5	0.0078	R	DLEVVAATPTSLLISWDAPAVTVRYYR	I			F80CXA20_2.8473.8473.3
3	F8W7G7	Uncharacterized protein OS=Homo sapiens GN=FN1 PE=4 SV=1	9649	246447	521	400	146	134	18362	1	0	0	1521.8	3041.58	2	3041.58	0	0	23.83	0.02	K	VVTPLSPPTNLHLEANPDTGVLTVSWER	S			F80TXA20.7581.7581.2
3	F8W7G7	Uncharacterized protein OS=Homo sapiens GN=FN1 PE=4 SV=1	9649	246447	521	400	146	134	18363	1	0	0	1521.8	3041.58	2	3041.58	0	0	41.28	0.00036	K	VVTPLSPPTNLHLEANPDTGVLTVSWER	S			F80TXB20.7564.7564.2
3	F8W7G7	Uncharacterized protein OS=Homo sapiens GN=FN1 PE=4 SV=1	9649	246447	521	400	146	134	18364	1	0	0	1014.87	3041.59	3	3041.58	0	0	35.39	0.0013	K	VVTPLSPPTNLHLEANPDTGVLTVSWER	S			f69txa20.7188.7188.3
3	F8W7G7	Uncharacterized protein OS=Homo sapiens GN=FN1 PE=4 SV=1	9649	246447	521	400	146	134	18365	1	0	0	1014.87	3041.59	3	3041.58	0	0	21.32	0.032	K	VVTPLSPPTNLHLEANPDTGVLTVSWER	S			m84txb20.6880.6880.3
3	F8W7G7	Uncharacterized protein OS=Homo sapiens GN=FN1 PE=4 SV=1	9649	246447	521	400	146	134	18397	1	0	0	1020.2	3057.58	3	3057.57	0	1	27.88	0.0086	R	FTNIGPDTMRVTWAPPPSIDLTNFLVR	Y			2_F80CXA20_1.8502.8502.3
3	F8W7G7	Uncharacterized protein OS=Homo sapiens GN=FN1 PE=4 SV=1	9649	246447	521	400	146	134	18398	1	0	0	1020.2	3057.58	3	3057.57	0	1	33.51	0.0024	R	FTNIGPDTMRVTWAPPPSIDLTNFLVR	Y			F80CXA20_1.8549.8549.3
3	F8W7G7	Uncharacterized protein OS=Homo sapiens GN=FN1 PE=4 SV=1	9649	246447	521	400	146	134	18530	1	0	0	1034.44	3100.31	3	3100.31	0	1	35.89	0.00044	R	CDNCRRPGGEPSPEGTTGQSYNQYSQR	Y			F80TXA20.2792.2792.3
3	F8W7G7	Uncharacterized protein OS=Homo sapiens GN=FN1 PE=4 SV=1	9649	246447	521	400	146	134	18531	1	0	0	1034.44	3100.31	3	3100.31	0	1	25.95	0.0043	R	CDNCRRPGGEPSPEGTTGQSYNQYSQR	Y			F80TXB20.2791.2791.3
3	F8W7G7	Uncharacterized protein OS=Homo sapiens GN=FN1 PE=4 SV=1	9649	246447	521	400	146	134	18532	1	0	0	776.09	3100.31	4	3100.31	0	1	27.65	0.0029	R	CDNCRRPGGEPSPEGTTGQSYNQYSQR	Y			f69txb20.2341.2341.4
3	F8W7G7	Uncharacterized protein OS=Homo sapiens GN=FN1 PE=4 SV=1	9649	246447	521	400	146	134	18533	1	0	0	776.09	3100.31	4	3100.31	0	1	30.76	0.0014	R	CDNCRRPGGEPSPEGTTGQSYNQYSQR	Y			f69txa20.2516.2516.4
3	F8W7G7	Uncharacterized protein OS=Homo sapiens GN=FN1 PE=4 SV=1	9649	246447	521	400	146	134	18768	1	0	0	1057.23	3168.66	3	3168.66	0	1	21.76	0.033	K	EINLAPDSSSVVVSGLMVATKYEVSVYALK	D			2_F80CXA20_2.8642.8642.3
3	F8W7G7	Uncharacterized protein OS=Homo sapiens GN=FN1 PE=4 SV=1	9649	246447	521	400	146	134	18769	1	0	0	1057.23	3168.66	3	3168.66	0	1	12.22	0.3	K	EINLAPDSSSVVVSGLMVATKYEVSVYALK	D			m84cxa20.8460.8460.3
3	F8W7G7	Uncharacterized protein OS=Homo sapiens GN=FN1 PE=4 SV=1	9649	246447	521	400	146	134	18785	1	0	0	635.72	3173.58	5	3173.58	0	1	21.19	0.06	R	QKTGLDSPTGIDFSDITANSFTVHWIAPR	A			F80CXA20_1.7810.7810.5
3	F8W7G7	Uncharacterized protein OS=Homo sapiens GN=FN1 PE=4 SV=1	9649	246447	521	400	146	134	18796	1	0	0	1060.45	3178.33	3	3178.33	0.01	1	47.94	3.5e-05	R	WKCDPVDQCQDSETGTFYQIGDSWEK	Y			m84txa20.5686.5686.3
3	F8W7G7	Uncharacterized protein OS=Homo sapiens GN=FN1 PE=4 SV=1	9649	246447	521	400	146	134	18797	1	0	0	1060.45	3178.33	3	3178.33	0.01	1	58.94	2.7e-06	R	WKCDPVDQCQDSETGTFYQIGDSWEK	Y			2_F80TXA20.6386.6386.3
3	F8W7G7	Uncharacterized protein OS=Homo sapiens GN=FN1 PE=4 SV=1	9649	246447	521	400	146	134	18977	1	0	0	813.18	3248.67	4	3248.68	0	1	11.37	0.55	K	ESVPISDTIIPAVPPPTDLRFTNIGPDTMR	V			F80CXA20_2.7739.7739.4
3	F8W7G7	Uncharacterized protein OS=Homo sapiens GN=FN1 PE=4 SV=1	9649	246447	521	400	146	134	18978	1	0	0	813.18	3248.67	4	3248.68	0	1	7.4	1.4	K	ESVPISDTIIPAVPPPTDLRFTNIGPDTMR	V			2_F80CXA20_2.7777.7777.4
3	F8W7G7	Uncharacterized protein OS=Homo sapiens GN=FN1 PE=4 SV=1	9649	246447	521	400	146	134	18979	1	0	0	1083.9	3248.68	3	3248.68	0	1	27.06	0.015	K	ESVPISDTIIPAVPPPTDLRFTNIGPDTMR	V			2_F80CXA20_2.7768.7768.3
3	F8W7G7	Uncharacterized protein OS=Homo sapiens GN=FN1 PE=4 SV=1	9649	246447	521	400	146	134	18980	1	0	0	1083.9	3248.68	3	3248.68	0	1	32.99	0.0039	K	ESVPISDTIIPAVPPPTDLRFTNIGPDTMR	V			F80TXB20.7827.7827.3
3	F8W7G7	Uncharacterized protein OS=Homo sapiens GN=FN1 PE=4 SV=1	9649	246447	521	400	146	134	19343	1	0	0	1130.93	3389.78	3	3389.78	-0.01	1	48.76	3.9e-05	K	YEVSVYALKDTLTSRPAQGVVTTLENVSPPR	R			F80TXB20.7418.7418.3
3	F8W7G7	Uncharacterized protein OS=Homo sapiens GN=FN1 PE=4 SV=1	9649	246447	521	400	146	134	19344	1	0	0	1130.93	3389.78	3	3389.78	-0.01	1	33.09	0.0014	K	YEVSVYALKDTLTSRPAQGVVTTLENVSPPR	R			F80CXA20_1.7405.7405.3
3	F8W7G7	Uncharacterized protein OS=Homo sapiens GN=FN1 PE=4 SV=1	9649	246447	521	400	146	134	19345	1	0	0	848.45	3389.78	4	3389.78	0	1	9.99	0.28	K	YEVSVYALKDTLTSRPAQGVVTTLENVSPPR	R			F80TXA20.7401.7401.4
3	F8W7G7	Uncharacterized protein OS=Homo sapiens GN=FN1 PE=4 SV=1	9649	246447	521	400	146	134	19346	1	0	0	848.45	3389.78	4	3389.78	0	1	18.84	0.037	K	YEVSVYALKDTLTSRPAQGVVTTLENVSPPR	R			2_F80CXA20_1.7372.7372.4
3	F8W7G7	Uncharacterized protein OS=Homo sapiens GN=FN1 PE=4 SV=1	9649	246447	521	400	146	134	19373	1	0	0	1133.81	3398.42	3	3398.42	0	1	39.21	0.00021	R	TFYSCTTEGRQDGHLWCSTTSNYEQDQK	Y			F80TXB20.4612.4612.3
3	F8W7G7	Uncharacterized protein OS=Homo sapiens GN=FN1 PE=4 SV=1	9649	246447	521	400	146	134	19374	1	0	0	1133.81	3398.42	3	3398.42	0	1	37.91	0.00028	R	TFYSCTTEGRQDGHLWCSTTSNYEQDQK	Y			f69txb20.3955.3955.3
3	F8W7G7	Uncharacterized protein OS=Homo sapiens GN=FN1 PE=4 SV=1	9649	246447	521	400	146	134	19375	1	0	0	850.61	3398.42	4	3398.42	0	1	10.55	0.16	R	TFYSCTTEGRQDGHLWCSTTSNYEQDQK	Y			f69txb20.3954.3954.4
3	F8W7G7	Uncharacterized protein OS=Homo sapiens GN=FN1 PE=4 SV=1	9649	246447	521	400	146	134	19376	1	0	0	850.61	3398.42	4	3398.42	0	1	17.41	0.033	R	TFYSCTTEGRQDGHLWCSTTSNYEQDQK	Y			m84cxa20.4401.4401.4
3	F8W7G7	Uncharacterized protein OS=Homo sapiens GN=FN1 PE=4 SV=1	9649	246447	521	400	146	134	19413	1	0	0	855.44	3417.75	4	3417.75	0	1	1.58	4.3	K	VTIMWTPPESAVTGYRVDVIPVNLPGEHGQR	L			2_F80TXB20.7465.7465.4
3	F8W7G7	Uncharacterized protein OS=Homo sapiens GN=FN1 PE=4 SV=1	9649	246447	521	400	146	134	19553	1	0	0	1157.3	3468.89	3	3468.89	0	0	33.01	0.0013	R	EVVPRPRPGVTEATITGLEPGTEYTIYVIALK	N			F80TXA20.7696.7696.3
3	F8W7G7	Uncharacterized protein OS=Homo sapiens GN=FN1 PE=4 SV=1	9649	246447	521	400	146	134	19554	1	0	0	1157.3	3468.89	3	3468.89	0	0	33.76	0.0011	R	EVVPRPRPGVTEATITGLEPGTEYTIYVIALK	N			2_F80TXA20.7761.7761.3
3	F8W7G7	Uncharacterized protein OS=Homo sapiens GN=FN1 PE=4 SV=1	9649	246447	521	400	146	134	19555	1	0	0	868.23	3468.89	4	3468.89	0	0	42.96	0.00013	R	EVVPRPRPGVTEATITGLEPGTEYTIYVIALK	N			F80TXB20.7704.7704.4
3	F8W7G7	Uncharacterized protein OS=Homo sapiens GN=FN1 PE=4 SV=1	9649	246447	521	400	146	134	19556	1	0	0	868.23	3468.89	4	3468.89	0	0	22.05	0.017	R	EVVPRPRPGVTEATITGLEPGTEYTIYVIALK	N			2_F80TXB20.7655.7655.4
3	F8W7G7	Uncharacterized protein OS=Homo sapiens GN=FN1 PE=4 SV=1	9649	246447	521	400	146	134	19577	1	0	0	870.16	3476.61	4	3476.61	0	1	43.46	0.00033	R	RPHETGGYMLECVCLGNGKGEWTCKPIAEK	C			F80CXA20_2.5264.5264.4
3	F8W7G7	Uncharacterized protein OS=Homo sapiens GN=FN1 PE=4 SV=1	9649	246447	521	400	146	134	19578	1	0	0	870.16	3476.61	4	3476.61	0	1	44.53	0.00026	R	RPHETGGYMLECVCLGNGKGEWTCKPIAEK	C			F80TXA20.5278.5278.4
3	F8W7G7	Uncharacterized protein OS=Homo sapiens GN=FN1 PE=4 SV=1	9649	246447	521	400	146	134	19579	1	0	0	696.33	3476.62	5	3476.61	0.01	1	17.25	0.14	R	RPHETGGYMLECVCLGNGKGEWTCKPIAEK	C			F80CXA20_1.5326.5326.5
3	F8W7G7	Uncharacterized protein OS=Homo sapiens GN=FN1 PE=4 SV=1	9649	246447	521	400	146	134	19580	1	0	0	696.33	3476.62	5	3476.61	0.01	1	10.82	0.61	R	RPHETGGYMLECVCLGNGKGEWTCKPIAEK	C			F80TXA20.5296.5296.5
3	F8W7G7	Uncharacterized protein OS=Homo sapiens GN=FN1 PE=4 SV=1	9649	246447	521	400	146	134	19786	1	0	0	1185.27	3552.79	3	3552.79	0	1	52.99	2.9e-05	R	EVTSDSGSIVVSGLTPGVEYVYTIQVLRDGQER	D			F80CXA20_2.7720.7720.3
3	F8W7G7	Uncharacterized protein OS=Homo sapiens GN=FN1 PE=4 SV=1	9649	246447	521	400	146	134	19787	1	0	0	1185.27	3552.79	3	3552.79	0	1	40.88	0.00047	R	EVTSDSGSIVVSGLTPGVEYVYTIQVLRDGQER	D			F80CXA20_1.7768.7768.3
3	F8W7G7	Uncharacterized protein OS=Homo sapiens GN=FN1 PE=4 SV=1	9649	246447	521	400	146	134	19788	1	0	0	1185.27	3552.8	3	3552.79	0	1	54.84	2e-05	R	EVTSDSGSIVVSGLTPGVEYVYTIQVLRDGQER	D			F80TXB20.7950.7950.3
3	F8W7G7	Uncharacterized protein OS=Homo sapiens GN=FN1 PE=4 SV=1	9649	246447	521	400	146	134	19789	1	0	0	1185.27	3552.8	3	3552.79	0	1	53.52	2.7e-05	R	EVTSDSGSIVVSGLTPGVEYVYTIQVLRDGQER	D			2_F80TXB20.7884.7884.3
3	F8W7G7	Uncharacterized protein OS=Homo sapiens GN=FN1 PE=4 SV=1	9649	246447	521	400	146	134	19792	1	0	0	889.21	3552.8	4	3552.79	0	1	25.4	0.017	R	EVTSDSGSIVVSGLTPGVEYVYTIQVLRDGQER	D			F80CXA20_1.7900.7900.4
3	F8W7G7	Uncharacterized protein OS=Homo sapiens GN=FN1 PE=4 SV=1	9649	246447	521	400	146	134	19793	1	0	0	889.21	3552.8	4	3552.79	0	1	11.66	0.4	R	EVTSDSGSIVVSGLTPGVEYVYTIQVLRDGQER	D			F80TXA20.7955.7955.4
3	F8W7G7	Uncharacterized protein OS=Homo sapiens GN=FN1 PE=4 SV=1	9649	246447	521	400	146	134	19848	1	0	0	1192.85	3575.53	3	3575.54	-0.01	1	37.09	0.00022	K	CDPVDQCQDSETGTFYQIGDSWEKYVHGVR	Y			F80TXB20.7330.7330.3
3	F8W7G7	Uncharacterized protein OS=Homo sapiens GN=FN1 PE=4 SV=1	9649	246447	521	400	146	134	19849	1	0	0	1192.85	3575.53	3	3575.54	-0.01	1	60.03	1.1e-06	K	CDPVDQCQDSETGTFYQIGDSWEKYVHGVR	Y			2_F80TXA20.7365.7365.3
3	F8W7G7	Uncharacterized protein OS=Homo sapiens GN=FN1 PE=4 SV=1	9649	246447	521	400	146	134	19850	1	0	0	894.89	3575.54	4	3575.54	0	1	58.53	1.8e-06	K	CDPVDQCQDSETGTFYQIGDSWEKYVHGVR	Y			f69txb20.6428.6428.4
3	F8W7G7	Uncharacterized protein OS=Homo sapiens GN=FN1 PE=4 SV=1	9649	246447	521	400	146	134	19851	1	0	0	894.89	3575.54	4	3575.54	0	1	47.4	2.4e-05	K	CDPVDQCQDSETGTFYQIGDSWEKYVHGVR	Y			m84txa20.6600.6600.4
3	F8W7G7	Uncharacterized protein OS=Homo sapiens GN=FN1 PE=4 SV=1	9649	246447	521	400	146	134	20002	1	0	0	1216.26	3645.76	3	3645.76	0	0	8.29	1.1	R	VEYELSEEGDEPQYLDLPSTATSVNIPDLLPGR	K			F80CXA20_1.8043.8043.3
3	F8W7G7	Uncharacterized protein OS=Homo sapiens GN=FN1 PE=4 SV=1	9649	246447	521	400	146	134	20200	1	0	0	1258.96	3773.86	3	3773.85	0	1	55.43	1.8e-05	R	VEYELSEEGDEPQYLDLPSTATSVNIPDLLPGRK	Y			2_F80TXA20.7781.7781.3
3	F8W7G7	Uncharacterized protein OS=Homo sapiens GN=FN1 PE=4 SV=1	9649	246447	521	400	146	134	20201	1	0	0	1258.96	3773.86	3	3773.85	0	1	66.35	1.5e-06	R	VEYELSEEGDEPQYLDLPSTATSVNIPDLLPGRK	Y			f69cxa20_100930142853.7031.7031.3
3	F8W7G7	Uncharacterized protein OS=Homo sapiens GN=FN1 PE=4 SV=1	9649	246447	521	400	146	134	20202	1	0	0	944.47	3773.86	4	3773.85	0.01	1	33.94	0.0024	R	VEYELSEEGDEPQYLDLPSTATSVNIPDLLPGRK	Y			F80TXB20.7730.7730.4
3	F8W7G7	Uncharacterized protein OS=Homo sapiens GN=FN1 PE=4 SV=1	9649	246447	521	400	146	134	20203	1	0	0	944.47	3773.86	4	3773.85	0.01	1	33.29	0.0028	R	VEYELSEEGDEPQYLDLPSTATSVNIPDLLPGRK	Y			F80CXA20_1.7707.7707.4
3	F8W7G7	Uncharacterized protein OS=Homo sapiens GN=FN1 PE=4 SV=1	9649	246447	521	400	146	134	20215	1	0	0	945.75	3778.99	4	3778.99	0	1	16.37	0.054	R	DAPIVNKVVTPLSPPTNLHLEANPDTGVLTVSWER	S			F80TXB20.7603.7603.4
3	F8W7G7	Uncharacterized protein OS=Homo sapiens GN=FN1 PE=4 SV=1	9649	246447	521	400	146	134	20216	1	0	0	945.75	3778.99	4	3778.99	0	1	22.62	0.013	R	DAPIVNKVVTPLSPPTNLHLEANPDTGVLTVSWER	S			f69cxb20.6942.6942.4
3	F8W7G7	Uncharacterized protein OS=Homo sapiens GN=FN1 PE=4 SV=1	9649	246447	521	400	146	134	20217	1	0	0	1260.67	3778.99	3	3778.99	0	1	48.07	3.7e-05	R	DAPIVNKVVTPLSPPTNLHLEANPDTGVLTVSWER	S			F80TXA20.7601.7601.3
3	F8W7G7	Uncharacterized protein OS=Homo sapiens GN=FN1 PE=4 SV=1	9649	246447	521	400	146	134	20218	1	0	0	1260.67	3778.99	3	3778.99	0	1	61.56	1.6e-06	R	DAPIVNKVVTPLSPPTNLHLEANPDTGVLTVSWER	S			F80TXB20.7590.7590.3
3	F8W7G7	Uncharacterized protein OS=Homo sapiens GN=FN1 PE=4 SV=1	9649	246447	521	400	146	134	20236	1	0	0	948.97	3791.87	4	3791.87	0	1	21.55	0.042	R	TEIDKPSQMQVTDVQDNSISVKWLPSSSPVTGYR	V			F80CXA20_2.6473.6473.4
3	F8W7G7	Uncharacterized protein OS=Homo sapiens GN=FN1 PE=4 SV=1	9649	246447	521	400	146	134	20237	1	0	0	948.97	3791.87	4	3791.87	0	1	21.42	0.044	R	TEIDKPSQMQVTDVQDNSISVKWLPSSSPVTGYR	V			2_F80CXA20_2.6504.6504.4
3	F8W7G7	Uncharacterized protein OS=Homo sapiens GN=FN1 PE=4 SV=1	9649	246447	521	400	146	134	20238	1	0	0	1264.97	3791.89	3	3791.87	0.03	1	15.94	0.12	R	TEIDKPSQMQVTDVQDNSISVKWLPSSSPVTGYR	V			2_F80CXA20_1.6521.6521.3
3	F8W7G7	Uncharacterized protein OS=Homo sapiens GN=FN1 PE=4 SV=1	9649	246447	521	400	146	134	20243	1	0	0	949.21	3792.82	4	3792.82	0	0	10.73	0.5	R	AAVYQPQPHPQPPPYGHCVTDSGVVYSVGMQWLK	T			2_F80TXB20.6952.6952.4
3	F8W7G7	Uncharacterized protein OS=Homo sapiens GN=FN1 PE=4 SV=1	9649	246447	521	400	146	134	20244	1	0	0	949.21	3792.82	4	3792.82	0	0	13.41	0.27	R	AAVYQPQPHPQPPPYGHCVTDSGVVYSVGMQWLK	T			f69cxb20.6403.6403.4
3	F8W7G7	Uncharacterized protein OS=Homo sapiens GN=FN1 PE=4 SV=1	9649	246447	521	400	146	134	20245	1	0	0	1265.28	3792.82	3	3792.82	0	0	25.56	0.016	R	AAVYQPQPHPQPPPYGHCVTDSGVVYSVGMQWLK	T			F80TXB20.7024.7024.3
3	F8W7G7	Uncharacterized protein OS=Homo sapiens GN=FN1 PE=4 SV=1	9649	246447	521	400	146	134	20246	1	0	0	1265.28	3792.82	3	3792.82	0	0	38.16	0.00087	R	AAVYQPQPHPQPPPYGHCVTDSGVVYSVGMQWLK	T			F80TXA20.6997.6997.3
3	F8W7G7	Uncharacterized protein OS=Homo sapiens GN=FN1 PE=4 SV=1	9649	246447	521	400	146	134	20266	1	0	0	953.21	3808.82	4	3808.81	0.01	0	6.21	1.3	R	AAVYQPQPHPQPPPYGHCVTDSGVVYSVGMQWLK	T	Oxidation (M)	0.0000000000000000000000000000010000.0	2_F80CXA20_2.6463.6463.4
3	F8W7G7	Uncharacterized protein OS=Homo sapiens GN=FN1 PE=4 SV=1	9649	246447	521	400	146	134	20267	1	0	0	953.21	3808.82	4	3808.81	0.01	0	12.07	0.34	R	AAVYQPQPHPQPPPYGHCVTDSGVVYSVGMQWLK	T	Oxidation (M)	0.0000000000000000000000000000010000.0	F80CXA20_2.6436.6436.4
3	F8W7G7	Uncharacterized protein OS=Homo sapiens GN=FN1 PE=4 SV=1	9649	246447	521	400	146	134	20391	1	0	0	976.94	3903.73	4	3903.72	0.01	1	5.62	0.51	R	QDGHLWCSTTSNYEQDQKYSFCTDHTVLVQTR	G			2_F80TXA20.5472.5472.4
3	F8W7G7	Uncharacterized protein OS=Homo sapiens GN=FN1 PE=4 SV=1	9649	246447	521	400	146	134	20392	1	0	0	976.94	3903.73	4	3903.72	0.01	1	19.3	0.022	R	QDGHLWCSTTSNYEQDQKYSFCTDHTVLVQTR	G			f69cxa20.4752.4752.4
3	F8W7G7	Uncharacterized protein OS=Homo sapiens GN=FN1 PE=4 SV=1	9649	246447	521	400	146	134	20445	1	0	0	989.29	3953.13	4	3953.13	0.01	1	58.74	2.2e-06	R	EVVPRPRPGVTEATITGLEPGTEYTIYVIALKNNQK	S			2_F80CXA20_1.7016.7016.4
3	F8W7G7	Uncharacterized protein OS=Homo sapiens GN=FN1 PE=4 SV=1	9649	246447	521	400	146	134	20446	1	0	0	989.29	3953.13	4	3953.13	0.01	1	80.04	1.6e-08	R	EVVPRPRPGVTEATITGLEPGTEYTIYVIALKNNQK	S			F80CXA20_1.7021.7021.4
3	F8W7G7	Uncharacterized protein OS=Homo sapiens GN=FN1 PE=4 SV=1	9649	246447	521	400	146	134	20447	1	0	0	791.64	3953.15	5	3953.13	0.02	1	12.77	0.077	R	EVVPRPRPGVTEATITGLEPGTEYTIYVIALKNNQK	S			F80CXA20_2.6997.6997.5
3	F8W7G7	Uncharacterized protein OS=Homo sapiens GN=FN1 PE=4 SV=1	9649	246447	521	400	146	134	20448	1	0	0	791.64	3953.15	5	3953.13	0.02	1	12.4	0.083	R	EVVPRPRPGVTEATITGLEPGTEYTIYVIALKNNQK	S			F80CXA20_1.7031.7031.5
3	F8W7G7	Uncharacterized protein OS=Homo sapiens GN=FN1 PE=4 SV=1	9649	246447	521	400	146	134	20558	1	0	0	1011.53	4042.09	4	4042.1	-0.01	1	25.77	0.013	K	STATISGLKPGVDYTITVYAVTGRGDSPASSKPISINYR	T			F80CXA20_1.6491.6491.4
3	F8W7G7	Uncharacterized protein OS=Homo sapiens GN=FN1 PE=4 SV=1	9649	246447	521	400	146	134	20559	1	0	0	1011.53	4042.09	4	4042.1	-0.01	1	20.87	0.04	K	STATISGLKPGVDYTITVYAVTGRGDSPASSKPISINYR	T			F80TXA20.6454.6454.4
3	F8W7G7	Uncharacterized protein OS=Homo sapiens GN=FN1 PE=4 SV=1	9649	246447	521	400	146	134	20560	1	0	0	809.43	4042.1	5	4042.1	0	1	3.07	2.4	K	STATISGLKPGVDYTITVYAVTGRGDSPASSKPISINYR	T			F80CXA20_2.6453.6453.5
3	F8W7G7	Uncharacterized protein OS=Homo sapiens GN=FN1 PE=4 SV=1	9649	246447	521	400	146	134	20561	1	0	0	809.43	4042.1	5	4042.1	0	1	13.69	0.21	K	STATISGLKPGVDYTITVYAVTGRGDSPASSKPISINYR	T			2_F80TXA20.6534.6534.5
3	F8W7G7	Uncharacterized protein OS=Homo sapiens GN=FN1 PE=4 SV=1	9649	246447	521	400	146	134	20696	1	0	0	1047.7	4186.75	4	4186.74	0.01	1	21.25	0.0075	K	WCGTTQNYDADQKFGFCPMAAHEEICTTNEGVMYR	I			2_F80CXA20_1.6184.6184.4
3	F8W7G7	Uncharacterized protein OS=Homo sapiens GN=FN1 PE=4 SV=1	9649	246447	521	400	146	134	20697	1	0	0	1047.7	4186.75	4	4186.74	0.01	1	14.1	0.039	K	WCGTTQNYDADQKFGFCPMAAHEEICTTNEGVMYR	I			F80CXA20_1.6192.6192.4
3	F8W7G7	Uncharacterized protein OS=Homo sapiens GN=FN1 PE=4 SV=1	9649	246447	521	400	146	134	20743	1	0	0	1061.2	4240.77	4	4240.78	-0.01	0	24.02	0.004	K	CFDHAAGTSYVVGETWEKPYQGWMMVDCTCLGEGSGR	I			F80CXA20_1.7208.7208.4
3	F8W7G7	Uncharacterized protein OS=Homo sapiens GN=FN1 PE=4 SV=1	9649	246447	521	400	146	134	20744	1	0	0	1061.2	4240.77	4	4240.78	-0.01	0	29.91	0.001	K	CFDHAAGTSYVVGETWEKPYQGWMMVDCTCLGEGSGR	I			F80CXA20_2.7161.7161.4
3	F8W7G7	Uncharacterized protein OS=Homo sapiens GN=FN1 PE=4 SV=1	9649	246447	521	400	146	134	20830	1	0	0	865.66	4323.28	5	4323.27	0.01	1	17.04	0.043	K	EATIPGHLNSYTIKGLKPGVVYEGQLISIQQYGHQEVTR	F			2_F80CXA20_1.6411.6411.5
3	F8W7G7	Uncharacterized protein OS=Homo sapiens GN=FN1 PE=4 SV=1	9649	246447	521	400	146	134	20831	1	0	0	865.66	4323.28	5	4323.27	0.01	1	20.68	0.019	K	EATIPGHLNSYTIKGLKPGVVYEGQLISIQQYGHQEVTR	F			2_F80CXA20_2.6382.6382.5
3	F8W7G7	Uncharacterized protein OS=Homo sapiens GN=FN1 PE=4 SV=1	9649	246447	521	400	146	134	20907	1	1	1	1480.36	4438.07	3	4438.07	0	0	27.32	0.0078	K	TGQEALSQTTISWAPFQDTSEYIISCHPVGTDEEPLQFR	V			2_F80CXA20_2.8104.8104.3
3	F8W7G7	Uncharacterized protein OS=Homo sapiens GN=FN1 PE=4 SV=1	9649	246447	521	400	146	134	20908	1	1	1	1480.36	4438.07	3	4438.07	0	0	16.4	0.096	K	TGQEALSQTTISWAPFQDTSEYIISCHPVGTDEEPLQFR	V			2_F80CXA20_1.8097.8097.3
3	F8W7G7	Uncharacterized protein OS=Homo sapiens GN=FN1 PE=4 SV=1	9649	246447	521	400	146	134	20909	1	1	1	1110.53	4438.08	4	4438.07	0.01	0	21.8	0.026	K	TGQEALSQTTISWAPFQDTSEYIISCHPVGTDEEPLQFR	V			F80TXB20.8173.8173.4
3	F8W7G7	Uncharacterized protein OS=Homo sapiens GN=FN1 PE=4 SV=1	9649	246447	521	400	146	134	20910	1	0	0	1480.98	4439.93	3	4439.93	0	0	7.49	0.18	K	QMLCTCLGNGVSCQETAVTQTYGGNSNGEPCVLPFTYNGR	T			F80TXA20.7152.7152.3
3	F8W7G7	Uncharacterized protein OS=Homo sapiens GN=FN1 PE=4 SV=1	9649	246447	521	400	146	134	20912	1	0	0	1110.99	4439.93	4	4439.93	0	0	13.67	0.043	K	QMLCTCLGNGVSCQETAVTQTYGGNSNGEPCVLPFTYNGR	T			F80TXA20.7074.7074.4
3	F8W7G7	Uncharacterized protein OS=Homo sapiens GN=FN1 PE=4 SV=1	9649	246447	521	400	146	134	20913	1	0	0	1110.99	4439.93	4	4439.93	0	0	21.95	0.0064	K	QMLCTCLGNGVSCQETAVTQTYGGNSNGEPCVLPFTYNGR	T			2_F80CXA20_1.7076.7076.4
3	F8W7G7	Uncharacterized protein OS=Homo sapiens GN=FN1 PE=4 SV=1	9649	246447	521	400	146	134	20937	1	0	0	1487.46	4459.35	3	4459.35	0	1	8.68	0.14	R	EESPLLIGQQSTVSDVPRDLEVVAATPTSLLISWDAPAVTVR	Y			F80CXA20_2.9008.9008.3
3	F8W7G7	Uncharacterized protein OS=Homo sapiens GN=FN1 PE=4 SV=1	9649	246447	521	400	146	134	20938	1	0	0	1487.46	4459.35	3	4459.35	0	1	33.87	0.00041	R	EESPLLIGQQSTVSDVPRDLEVVAATPTSLLISWDAPAVTVR	Y			F80TXA20.9143.9143.3
3	F8W7G7	Uncharacterized protein OS=Homo sapiens GN=FN1 PE=4 SV=1	9649	246447	521	400	146	134	20939	1	0	0	1115.84	4459.35	4	4459.35	0	1	9.94	0.1	R	EESPLLIGQQSTVSDVPRDLEVVAATPTSLLISWDAPAVTVR	Y			F80TXB20.9135.9135.4
3	F8W7G7	Uncharacterized protein OS=Homo sapiens GN=FN1 PE=4 SV=1	9649	246447	521	400	146	134	20940	1	0	0	1115.84	4459.35	4	4459.35	0	1	8.85	0.13	R	EESPLLIGQQSTVSDVPRDLEVVAATPTSLLISWDAPAVTVR	Y			f69cxb20.8428.8428.4
3	F8W7G7	Uncharacterized protein OS=Homo sapiens GN=FN1 PE=4 SV=1	9649	246447	521	400	146	134	20951	1	0	0	1490.12	4467.35	3	4467.35	0	1	7.8	0.29	R	NSITLTNLTPGTEYVVSIVALNGREESPLLIGQQSTVSDVPR	D			2_F80CXA20_2.8408.8408.3
3	F8W7G7	Uncharacterized protein OS=Homo sapiens GN=FN1 PE=4 SV=1	9649	246447	521	400	146	134	20952	1	0	0	1490.12	4467.35	3	4467.35	0	1	20.37	0.016	R	NSITLTNLTPGTEYVVSIVALNGREESPLLIGQQSTVSDVPR	D			f69txa20.8116.8116.3
3	F8W7G7	Uncharacterized protein OS=Homo sapiens GN=FN1 PE=4 SV=1	9649	246447	521	400	146	134	20953	1	0	0	1117.85	4467.35	4	4467.35	0	1	23.09	0.0086	R	NSITLTNLTPGTEYVVSIVALNGREESPLLIGQQSTVSDVPR	D			f69txa20.8111.8111.4
3	F8W7G7	Uncharacterized protein OS=Homo sapiens GN=FN1 PE=4 SV=1	9649	246447	521	400	146	134	20954	1	0	0	1117.85	4467.35	4	4467.35	0	1	10.49	0.16	R	NSITLTNLTPGTEYVVSIVALNGREESPLLIGQQSTVSDVPR	D			f69cxb20.7780.7780.4
3	F8W7G7	Uncharacterized protein OS=Homo sapiens GN=FN1 PE=4 SV=1	9649	246447	521	400	146	134	21257	1	0	0	1222.6	4886.37	4	4886.4	-0.03	0	24.91	0.0094	K	NEEDVAELSISPSDNAVVLTNLLPGTEYVVSVSSVYEQHESTPLR	G			F80TXA20.8786.8786.4
3	F8W7G7	Uncharacterized protein OS=Homo sapiens GN=FN1 PE=4 SV=1	9649	246447	521	400	146	134	21258	1	0	0	1222.6	4886.37	4	4886.4	-0.03	0	6.74	0.61	K	NEEDVAELSISPSDNAVVLTNLLPGTEYVVSVSSVYEQHESTPLR	G			2_F80CXA20_1.8679.8679.4
3	F8W7G7	Uncharacterized protein OS=Homo sapiens GN=FN1 PE=4 SV=1	9649	246447	521	400	146	134	21406	1	0	0	1032.51	5157.5	5	5157.55	-0.04	0	22.83	0.017	K	TAGPDQTEMTIEGLQPTVEYVVSVYAQNPSGESQPLVQTAVTNIDRPK	G			2_F80TXA20.8446.8446.5
3	F8W7G7	Uncharacterized protein OS=Homo sapiens GN=FN1 PE=4 SV=1	9649	246447	521	400	146	134	21407	1	0	0	1032.51	5157.5	5	5157.55	-0.04	0	12.73	0.18	K	TAGPDQTEMTIEGLQPTVEYVVSVYAQNPSGESQPLVQTAVTNIDRPK	G			F80CXA20_2.8282.8282.5
3	F8W7G7	Uncharacterized protein OS=Homo sapiens GN=FN1 PE=4 SV=1	9649	246447	521	400	146	134	21408	1	0	0	1290.39	5157.54	4	5157.55	0	0	47.42	5.8e-05	K	TAGPDQTEMTIEGLQPTVEYVVSVYAQNPSGESQPLVQTAVTNIDRPK	G			F80CXA20_1.8355.8355.4
3	F8W7G7	Uncharacterized protein OS=Homo sapiens GN=FN1 PE=4 SV=1	9649	246447	521	400	146	134	21409	1	0	0	1290.39	5157.54	4	5157.55	0	0	53.84	1.3e-05	K	TAGPDQTEMTIEGLQPTVEYVVSVYAQNPSGESQPLVQTAVTNIDRPK	G			F80TXA20.8410.8410.4
3	F8W7G7	Uncharacterized protein OS=Homo sapiens GN=FN1 PE=4 SV=1	9649	246447	521	400	146	134	21536	1	0	0	1070.91	5349.51	5	5349.56	-0.05	0	8.43	0.35	R	GIGEWHCQPLQTYPSSSGPVEVFITETPSQPNSHPIQWNAPQPSHISK	Y			F80CXA20_2.6882.6882.5
3	F8W7G7	Uncharacterized protein OS=Homo sapiens GN=FN1 PE=4 SV=1	9649	246447	521	400	146	134	21537	1	0	0	1070.91	5349.51	5	5349.56	-0.05	0	8.89	0.32	R	GIGEWHCQPLQTYPSSSGPVEVFITETPSQPNSHPIQWNAPQPSHISK	Y			2_F80CXA20_1.6902.6902.5
3	F8W7G7	Uncharacterized protein OS=Homo sapiens GN=FN1 PE=4 SV=1	9649	246447	521	400	146	134	21651	1	0	0	1093.15	5460.7	5	5460.71	-0.01	1	11.75	0.21	R	YSPVKNEEDVAELSISPSDNAVVLTNLLPGTEYVVSVSSVYEQHESTPLR	G			F80CXA20_1.8524.8524.5
3	F8W7G7	Uncharacterized protein OS=Homo sapiens GN=FN1 PE=4 SV=1	9649	246447	521	400	146	134	21652	1	0	0	1093.15	5460.7	5	5460.71	-0.01	1	1.49	2.2	R	YSPVKNEEDVAELSISPSDNAVVLTNLLPGTEYVVSVSSVYEQHESTPLR	G			F80CXA20_1.8577.8577.5
4	P49747	Cartilage oligomeric matrix protein OS=Homo sapiens GN=COMP PE=1 SV=2	4649	85431	207	160	54	51	1035	1	1	1	437.22	872.42	2	872.42	0	0	27.52	0.023	K	DNCPLVR	N			m84cxb20.2489.2489.2
4	P49747	Cartilage oligomeric matrix protein OS=Homo sapiens GN=COMP PE=1 SV=2	4649	85431	207	160	54	51	1036	1	1	1	437.22	872.42	2	872.42	0	0	24.26	0.048	K	DNCPLVR	N			F80TXB20.2943.2943.2
4	P49747	Cartilage oligomeric matrix protein OS=Homo sapiens GN=COMP PE=1 SV=2	4649	85431	207	160	54	51	1390	1	1	1	464.27	926.53	2	926.53	0	1	26.77	0.017	R	LLWKDPR	N			F80CXA20_1.4368.4368.2
4	P49747	Cartilage oligomeric matrix protein OS=Homo sapiens GN=COMP PE=1 SV=2	4649	85431	207	160	54	51	1391	1	1	1	464.27	926.53	2	926.53	0	1	14.5	0.29	R	LLWKDPR	N			2_F80CXA20_1.4342.4342.2
4	P49747	Cartilage oligomeric matrix protein OS=Homo sapiens GN=COMP PE=1 SV=2	4649	85431	207	160	54	51	1755	1	1	1	487.71	973.4	2	973.4	0	0	49.05	3.2e-05	R	NQADNCPR	V			m84txb20.1254.1254.2
4	P49747	Cartilage oligomeric matrix protein OS=Homo sapiens GN=COMP PE=1 SV=2	4649	85431	207	160	54	51	1756	1	1	1	487.71	973.4	2	973.4	0	0	29.54	0.0029	R	NQADNCPR	V			m84txa20.1250.1250.2
4	P49747	Cartilage oligomeric matrix protein OS=Homo sapiens GN=COMP PE=1 SV=2	4649	85431	207	160	54	51	2215	1	1	0	513.3	1024.59	2	1024.59	0	0	52.94	1.8e-05	R	AVAEPGIQLK	A			f69cxa20_100930142853.3820.3820.2
4	P49747	Cartilage oligomeric matrix protein OS=Homo sapiens GN=COMP PE=1 SV=2	4649	85431	207	160	54	51	2216	1	1	0	513.3	1024.59	2	1024.59	0	0	49.66	3.7e-05	R	AVAEPGIQLK	A			2_F80TXB20.4283.4283.2
4	P49747	Cartilage oligomeric matrix protein OS=Homo sapiens GN=COMP PE=1 SV=2	4649	85431	207	160	54	51	2253	1	1	1	516.26	1030.51	2	1030.5	0	0	52.72	9.7e-05	K	SSTGPGEQLR	N			f69cxb20_100930171645.2225.2225.2
4	P49747	Cartilage oligomeric matrix protein OS=Homo sapiens GN=COMP PE=1 SV=2	4649	85431	207	160	54	51	2254	1	1	1	516.26	1030.51	2	1030.5	0	0	55.32	5.3e-05	K	SSTGPGEQLR	N			f69cxa20_100930142853.2163.2163.2
4	P49747	Cartilage oligomeric matrix protein OS=Homo sapiens GN=COMP PE=1 SV=2	4649	85431	207	160	54	51	2342	1	1	1	521.31	1040.61	2	1040.61	0	1	25.07	0.016	R	ELLRQQVR	E			F80CXA20_2.2793.2793.2
4	P49747	Cartilage oligomeric matrix protein OS=Homo sapiens GN=COMP PE=1 SV=2	4649	85431	207	160	54	51	2343	1	1	1	521.31	1040.61	2	1040.61	0	1	18.33	0.076	R	ELLRQQVR	E			2_F80CXA20_2.2846.2846.2
4	P49747	Cartilage oligomeric matrix protein OS=Homo sapiens GN=COMP PE=1 SV=2	4649	85431	207	160	54	51	2432	1	1	1	526.25	1050.48	2	1050.49	-0.01	0	17.1	0.19	R	CINTSPGFR	C			f69txb20.6846.6846.2
4	P49747	Cartilage oligomeric matrix protein OS=Homo sapiens GN=COMP PE=1 SV=2	4649	85431	207	160	54	51	2433	1	1	1	526.25	1050.48	2	1050.49	-0.01	0	19.96	0.099	R	CINTSPGFR	C			f69txb20.6890.6890.2
4	P49747	Cartilage oligomeric matrix protein OS=Homo sapiens GN=COMP PE=1 SV=2	4649	85431	207	160	54	51	2435	1	1	1	1051.5	1050.49	1	1050.49	0	0	13.34	0.62	R	CINTSPGFR	C			2_F80TXA20.3561.3561.1
4	P49747	Cartilage oligomeric matrix protein OS=Homo sapiens GN=COMP PE=1 SV=2	4649	85431	207	160	54	51	2436	1	1	1	526.25	1050.49	2	1050.49	0	0	45.89	0.00042	R	CINTSPGFR	C			f69cxb20_100930171645.3098.3098.2
4	P49747	Cartilage oligomeric matrix protein OS=Homo sapiens GN=COMP PE=1 SV=2	4649	85431	207	160	54	51	2437	1	1	1	526.25	1050.49	2	1050.49	0	0	32.95	0.0082	R	CINTSPGFR	C			m84cxa20.3346.3346.2
4	P49747	Cartilage oligomeric matrix protein OS=Homo sapiens GN=COMP PE=1 SV=2	4649	85431	207	160	54	51	2438	1	1	1	526.26	1050.5	2	1050.49	0	0	9.54	1.6	R	CINTSPGFR	C			f69txb20.7141.7141.2
4	P49747	Cartilage oligomeric matrix protein OS=Homo sapiens GN=COMP PE=1 SV=2	4649	85431	207	160	54	51	2439	5	1	1	526.26	1050.5	2	1050.49	0	0	0.43	13	R	CINTSPGFR	C			f69txa20.7756.7756.2
4	P49747	Cartilage oligomeric matrix protein OS=Homo sapiens GN=COMP PE=1 SV=2	4649	85431	207	160	54	51	4422	1	1	1	626.27	1250.53	2	1250.53	0	0	76.57	1.2e-07	R	DTDLDGFPDEK	L			m84txb20.4117.4117.2
4	P49747	Cartilage oligomeric matrix protein OS=Homo sapiens GN=COMP PE=1 SV=2	4649	85431	207	160	54	51	4423	1	1	1	626.27	1250.53	2	1250.53	0	0	71.75	3.6e-07	R	DTDLDGFPDEK	L			F80TXA20.4750.4750.2
4	P49747	Cartilage oligomeric matrix protein OS=Homo sapiens GN=COMP PE=1 SV=2	4649	85431	207	160	54	51	5053	1	1	1	436.23	1305.66	3	1305.66	0	1	30.92	0.016	R	VRCINTSPGFR	C			2_F80CXA20_2.3313.3313.3
4	P49747	Cartilage oligomeric matrix protein OS=Homo sapiens GN=COMP PE=1 SV=2	4649	85431	207	160	54	51	5054	1	1	1	436.23	1305.66	3	1305.66	0	1	22.68	0.1	R	VRCINTSPGFR	C			2_F80TXB20.3231.3231.3
4	P49747	Cartilage oligomeric matrix protein OS=Homo sapiens GN=COMP PE=1 SV=2	4649	85431	207	160	54	51	5269	1	1	1	662.24	1322.47	2	1322.47	0	0	50.78	8.4e-06	R	GDACDDDIDGDR	I			m84txb20.2052.2052.2
4	P49747	Cartilage oligomeric matrix protein OS=Homo sapiens GN=COMP PE=1 SV=2	4649	85431	207	160	54	51	5270	1	1	1	662.24	1322.47	2	1322.47	0	0	55.1	3.1e-06	R	GDACDDDIDGDR	I			f69cxa20.1966.1966.2
4	P49747	Cartilage oligomeric matrix protein OS=Homo sapiens GN=COMP PE=1 SV=2	4649	85431	207	160	54	51	5285	1	1	0	441.94	1322.79	3	1322.79	0	1	12.83	0.15	R	AVAEPGIQLKAVK	S			2_F80CXA20_1.4362.4362.3
4	P49747	Cartilage oligomeric matrix protein OS=Homo sapiens GN=COMP PE=1 SV=2	4649	85431	207	160	54	51	5286	1	1	0	441.94	1322.79	3	1322.79	0	1	20.8	0.024	R	AVAEPGIQLKAVK	S			F80CXA20_1.4363.4363.3
4	P49747	Cartilage oligomeric matrix protein OS=Homo sapiens GN=COMP PE=1 SV=2	4649	85431	207	160	54	51	5355	1	1	1	665.36	1328.7	2	1328.7	0	1	40.58	0.0016	K	AVKSSTGPGEQLR	N			2_F80CXA20_2.2332.2332.2
4	P49747	Cartilage oligomeric matrix protein OS=Homo sapiens GN=COMP PE=1 SV=2	4649	85431	207	160	54	51	5356	1	1	1	665.36	1328.7	2	1328.7	0	1	47.44	0.00032	K	AVKSSTGPGEQLR	N			f69cxb20_100930171645.2059.2059.2
4	P49747	Cartilage oligomeric matrix protein OS=Homo sapiens GN=COMP PE=1 SV=2	4649	85431	207	160	54	51	7082	1	1	1	742.35	1482.69	2	1482.7	-0.01	1	4.84	3.8	K	DNCPLVRNPDQR	N			2_F80CXA20_2.3035.3035.2
4	P49747	Cartilage oligomeric matrix protein OS=Homo sapiens GN=COMP PE=1 SV=2	4649	85431	207	160	54	51	7083	1	1	1	742.35	1482.69	2	1482.7	-0.01	1	4.86	3.8	K	DNCPLVRNPDQR	N			2_F80CXA20_1.3023.3023.2
4	P49747	Cartilage oligomeric matrix protein OS=Homo sapiens GN=COMP PE=1 SV=2	4649	85431	207	160	54	51	7088	1	1	1	495.24	1482.7	3	1482.7	0	1	11.92	0.82	K	DNCPLVRNPDQR	N			F80CXA20_2.3001.3001.3
4	P49747	Cartilage oligomeric matrix protein OS=Homo sapiens GN=COMP PE=1 SV=2	4649	85431	207	160	54	51	7089	1	1	1	495.24	1482.7	3	1482.7	0	1	8.93	1.6	K	DNCPLVRNPDQR	N			2_F80CXA20_1.3031.3031.3
4	P49747	Cartilage oligomeric matrix protein OS=Homo sapiens GN=COMP PE=1 SV=2	4649	85431	207	160	54	51	7153	1	1	1	496.25	1485.74	3	1485.74	0	0	36.63	0.0037	R	ELQETNAALQDVR	E			2_F80CXA20_2.4285.4285.3
4	P49747	Cartilage oligomeric matrix protein OS=Homo sapiens GN=COMP PE=1 SV=2	4649	85431	207	160	54	51	7154	1	1	1	496.25	1485.74	3	1485.74	0	0	38.87	0.0022	R	ELQETNAALQDVR	E			F80TXA20.4228.4228.3
4	P49747	Cartilage oligomeric matrix protein OS=Homo sapiens GN=COMP PE=1 SV=2	4649	85431	207	160	54	51	7155	1	1	1	743.88	1485.74	2	1485.74	0	0	72.47	9.8e-07	R	ELQETNAALQDVR	E			F80CXA20_2.4245.4245.2
4	P49747	Cartilage oligomeric matrix protein OS=Homo sapiens GN=COMP PE=1 SV=2	4649	85431	207	160	54	51	7156	1	1	1	743.88	1485.74	2	1485.74	0	0	87.38	3.2e-08	R	ELQETNAALQDVR	E			2_F80TXB20.4207.4207.2
4	P49747	Cartilage oligomeric matrix protein OS=Homo sapiens GN=COMP PE=1 SV=2	4649	85431	207	160	54	51	7544	1	1	1	507.58	1519.72	3	1519.72	0	1	28.72	0.023	R	DTDLDGFPDEKLR	C			m84txb20.6920.6920.3
4	P49747	Cartilage oligomeric matrix protein OS=Homo sapiens GN=COMP PE=1 SV=2	4649	85431	207	160	54	51	7545	1	1	1	507.58	1519.72	3	1519.72	0	1	12.95	0.86	R	DTDLDGFPDEKLR	C			f69txb20.6877.6877.3
4	P49747	Cartilage oligomeric matrix protein OS=Homo sapiens GN=COMP PE=1 SV=2	4649	85431	207	160	54	51	7546	1	1	1	507.58	1519.72	3	1519.72	0	1	6.15	4.1	R	DTDLDGFPDEKLR	C			m84cxb20.7262.7262.3
4	P49747	Cartilage oligomeric matrix protein OS=Homo sapiens GN=COMP PE=1 SV=2	4649	85431	207	160	54	51	7547	1	1	1	507.58	1519.72	3	1519.72	0	1	25.59	0.047	R	DTDLDGFPDEKLR	C			f69cxa20_100930142853.7573.7573.3
4	P49747	Cartilage oligomeric matrix protein OS=Homo sapiens GN=COMP PE=1 SV=2	4649	85431	207	160	54	51	7548	1	1	1	760.87	1519.72	2	1519.72	0	1	64.9	5.6e-06	R	DTDLDGFPDEKLR	C			f69txa20.4673.4673.2
4	P49747	Cartilage oligomeric matrix protein OS=Homo sapiens GN=COMP PE=1 SV=2	4649	85431	207	160	54	51	7549	1	1	1	760.87	1519.72	2	1519.72	0	1	42.61	0.00094	R	DTDLDGFPDEKLR	C			f69cxb20_100930171645.4625.4625.2
4	P49747	Cartilage oligomeric matrix protein OS=Homo sapiens GN=COMP PE=1 SV=2	4649	85431	207	160	54	51	7550	1	1	1	507.58	1519.72	3	1519.72	0	1	30.88	0.014	R	DTDLDGFPDEKLR	C			f69cxa20_100930142853.4589.4589.3
4	P49747	Cartilage oligomeric matrix protein OS=Homo sapiens GN=COMP PE=1 SV=2	4649	85431	207	160	54	51	7551	1	1	1	507.58	1519.72	3	1519.72	0	1	50.54	0.00015	R	DTDLDGFPDEKLR	C			f69cxb20_100930171645.4614.4614.3
4	P49747	Cartilage oligomeric matrix protein OS=Homo sapiens GN=COMP PE=1 SV=2	4649	85431	207	160	54	51	8283	1	1	1	531.56	1591.65	3	1591.65	0	1	19.74	0.024	R	GDACDDDIDGDRIR	N			F80TXA20.3085.3085.3
4	P49747	Cartilage oligomeric matrix protein OS=Homo sapiens GN=COMP PE=1 SV=2	4649	85431	207	160	54	51	8469	1	1	1	538.59	1612.76	3	1612.76	0	0	6.21	2.7	R	NALWHTGDTESQVR	L			m84txb20.6548.6548.3
4	P49747	Cartilage oligomeric matrix protein OS=Homo sapiens GN=COMP PE=1 SV=2	4649	85431	207	160	54	51	8470	1	1	1	807.39	1612.76	2	1612.76	0	0	67.1	2.2e-06	R	NALWHTGDTESQVR	L			f69txa20.3538.3538.2
4	P49747	Cartilage oligomeric matrix protein OS=Homo sapiens GN=COMP PE=1 SV=2	4649	85431	207	160	54	51	8471	1	1	1	807.39	1612.76	2	1612.76	0	0	50.31	0.00011	R	NALWHTGDTESQVR	L			m84cxb20.3338.3338.2
4	P49747	Cartilage oligomeric matrix protein OS=Homo sapiens GN=COMP PE=1 SV=2	4649	85431	207	160	54	51	8472	1	1	1	538.59	1612.76	3	1612.76	0	0	47.22	0.00021	R	NALWHTGDTESQVR	L			f69txa20.3537.3537.3
4	P49747	Cartilage oligomeric matrix protein OS=Homo sapiens GN=COMP PE=1 SV=2	4649	85431	207	160	54	51	8473	1	1	1	538.59	1612.76	3	1612.76	0	0	49.08	0.00014	R	NALWHTGDTESQVR	L			f69txb20.3330.3330.3
4	P49747	Cartilage oligomeric matrix protein OS=Homo sapiens GN=COMP PE=1 SV=2	4649	85431	207	160	54	51	9424	1	1	1	849.89	1697.76	2	1697.76	0	0	63.43	3.9e-06	K	QMEQTYWQANPFR	A			2_F80CXA20_2.6334.6334.2
4	P49747	Cartilage oligomeric matrix protein OS=Homo sapiens GN=COMP PE=1 SV=2	4649	85431	207	160	54	51	9425	1	1	1	849.89	1697.76	2	1697.76	0	0	70.67	7.3e-07	K	QMEQTYWQANPFR	A			m84txb20.5612.5612.2
4	P49747	Cartilage oligomeric matrix protein OS=Homo sapiens GN=COMP PE=1 SV=2	4649	85431	207	160	54	51	9426	1	1	1	566.93	1697.76	3	1697.76	0	0	27.92	0.014	K	QMEQTYWQANPFR	A			F80TXA20.6321.6321.3
4	P49747	Cartilage oligomeric matrix protein OS=Homo sapiens GN=COMP PE=1 SV=2	4649	85431	207	160	54	51	9427	1	1	1	566.93	1697.76	3	1697.76	0	0	26.39	0.019	K	QMEQTYWQANPFR	A			m84txa20.5708.5708.3
4	P49747	Cartilage oligomeric matrix protein OS=Homo sapiens GN=COMP PE=1 SV=2	4649	85431	207	160	54	51	9428	1	1	1	849.89	1697.77	2	1697.76	0.01	0	8.36	1.3	K	QMEQTYWQANPFR	A			f69cxa20.6689.6689.2
4	P49747	Cartilage oligomeric matrix protein OS=Homo sapiens GN=COMP PE=1 SV=2	4649	85431	207	160	54	51	9429	1	1	1	849.89	1697.77	2	1697.76	0.01	0	8.71	1.2	K	QMEQTYWQANPFR	A			m84txb20.6600.6600.2
4	P49747	Cartilage oligomeric matrix protein OS=Homo sapiens GN=COMP PE=1 SV=2	4649	85431	207	160	54	51	9444	1	1	0	567.31	1698.91	3	1698.91	0	0	10.48	0.94	R	WFLQHRPQVGYIR	V			F80CXA20_2.5313.5313.3
4	P49747	Cartilage oligomeric matrix protein OS=Homo sapiens GN=COMP PE=1 SV=2	4649	85431	207	160	54	51	9446	1	1	0	425.73	1698.91	4	1698.91	0	0	12.09	0.68	R	WFLQHRPQVGYIR	V			f69cxa20_100930142853.5679.5679.4
4	P49747	Cartilage oligomeric matrix protein OS=Homo sapiens GN=COMP PE=1 SV=2	4649	85431	207	160	54	51	9447	1	1	0	425.73	1698.91	4	1698.91	0	0	14.06	0.43	R	WFLQHRPQVGYIR	V			f69cxa20_100930142853.5552.5552.4
4	P49747	Cartilage oligomeric matrix protein OS=Homo sapiens GN=COMP PE=1 SV=2	4649	85431	207	160	54	51	9448	1	1	0	850.46	1698.91	2	1698.91	0	0	1.58	7.6	R	WFLQHRPQVGYIR	V			m84txa20.5986.5986.2
4	P49747	Cartilage oligomeric matrix protein OS=Homo sapiens GN=COMP PE=1 SV=2	4649	85431	207	160	54	51	9450	1	1	0	425.74	1698.91	4	1698.91	0	0	20.96	0.079	R	WFLQHRPQVGYIR	V			2_F80CXA20_2.5348.5348.4
4	P49747	Cartilage oligomeric matrix protein OS=Homo sapiens GN=COMP PE=1 SV=2	4649	85431	207	160	54	51	9451	1	1	0	425.74	1698.91	4	1698.91	0	0	17.49	0.18	R	WFLQHRPQVGYIR	V			F80TXA20.5365.5365.4
4	P49747	Cartilage oligomeric matrix protein OS=Homo sapiens GN=COMP PE=1 SV=2	4649	85431	207	160	54	51	9618	1	1	1	857.89	1713.76	2	1713.76	0	0	34.02	0.0027	K	QMEQTYWQANPFR	A	Oxidation (M)	0.0100000000000.0	2_F80TXA20.6126.6126.2
4	P49747	Cartilage oligomeric matrix protein OS=Homo sapiens GN=COMP PE=1 SV=2	4649	85431	207	160	54	51	9619	1	1	1	857.89	1713.76	2	1713.76	0	0	42.02	0.00043	K	QMEQTYWQANPFR	A	Oxidation (M)	0.0100000000000.0	F80CXA20_2.6044.6044.2
4	P49747	Cartilage oligomeric matrix protein OS=Homo sapiens GN=COMP PE=1 SV=2	4649	85431	207	160	54	51	9853	1	1	1	871.9	1741.78	2	1741.78	0	1	46.38	0.00014	R	NQADNCPRVPNSDQK	D			F80CXA20_1.2184.2184.2
4	P49747	Cartilage oligomeric matrix protein OS=Homo sapiens GN=COMP PE=1 SV=2	4649	85431	207	160	54	51	9854	1	1	1	871.9	1741.78	2	1741.78	0	1	28.86	0.0079	R	NQADNCPRVPNSDQK	D			f69cxa20.1805.1805.2
4	P49747	Cartilage oligomeric matrix protein OS=Homo sapiens GN=COMP PE=1 SV=2	4649	85431	207	160	54	51	9859	1	1	1	581.6	1741.78	3	1741.78	0	1	19.09	0.074	R	NQADNCPRVPNSDQK	D			f69txa20.1960.1960.3
4	P49747	Cartilage oligomeric matrix protein OS=Homo sapiens GN=COMP PE=1 SV=2	4649	85431	207	160	54	51	9860	1	1	1	581.6	1741.78	3	1741.78	0	1	7.19	1.1	R	NQADNCPRVPNSDQK	D			f69cxa20_100930142853.1882.1882.3
4	P49747	Cartilage oligomeric matrix protein OS=Homo sapiens GN=COMP PE=1 SV=2	4649	85431	207	160	54	51	10672	1	1	1	912.34	1822.67	2	1822.67	0	0	60.25	9.4e-07	K	DSDGDGIGDACDNCPQK	S			m84txb20.2315.2315.2
4	P49747	Cartilage oligomeric matrix protein OS=Homo sapiens GN=COMP PE=1 SV=2	4649	85431	207	160	54	51	10673	1	1	1	912.34	1822.67	2	1822.67	0	0	84.35	3.7e-09	K	DSDGDGIGDACDNCPQK	S			2_F80CXA20_2.2703.2703.2
4	P49747	Cartilage oligomeric matrix protein OS=Homo sapiens GN=COMP PE=1 SV=2	4649	85431	207	160	54	51	10839	1	1	1	612.95	1835.82	3	1835.82	0	0	88.71	9.1e-09	R	SCVCAVGWAGNGILCGR	D			F80TXA20.6297.6297.3
4	P49747	Cartilage oligomeric matrix protein OS=Homo sapiens GN=COMP PE=1 SV=2	4649	85431	207	160	54	51	10840	1	1	1	612.95	1835.82	3	1835.82	0	0	79.03	8.4e-08	R	SCVCAVGWAGNGILCGR	D			2_F80CXA20_1.6325.6325.3
4	P49747	Cartilage oligomeric matrix protein OS=Homo sapiens GN=COMP PE=1 SV=2	4649	85431	207	160	54	51	10841	1	1	1	918.92	1835.83	2	1835.82	0	0	54.91	2.2e-05	R	SCVCAVGWAGNGILCGR	D			f69cxa20_100930142853.5764.5764.2
4	P49747	Cartilage oligomeric matrix protein OS=Homo sapiens GN=COMP PE=1 SV=2	4649	85431	207	160	54	51	10842	1	1	1	918.92	1835.83	2	1835.82	0	0	48.89	8.7e-05	R	SCVCAVGWAGNGILCGR	D			f69cxb20.5795.5795.2
4	P49747	Cartilage oligomeric matrix protein OS=Homo sapiens GN=COMP PE=1 SV=2	4649	85431	207	160	54	51	11044	1	1	1	619.24	1854.69	3	1854.69	0	1	46.06	2.5e-05	R	NTDEDKWGDACDNCR	S			m84txb20.2417.2417.3
4	P49747	Cartilage oligomeric matrix protein OS=Homo sapiens GN=COMP PE=1 SV=2	4649	85431	207	160	54	51	11045	1	1	1	619.24	1854.69	3	1854.69	0	1	43.09	4.9e-05	R	NTDEDKWGDACDNCR	S			F80TXA20.2739.2739.3
4	P49747	Cartilage oligomeric matrix protein OS=Homo sapiens GN=COMP PE=1 SV=2	4649	85431	207	160	54	51	11046	1	1	1	928.35	1854.69	2	1854.69	0	1	48.78	1.3e-05	R	NTDEDKWGDACDNCR	S			F80TXA20.2750.2750.2
4	P49747	Cartilage oligomeric matrix protein OS=Homo sapiens GN=COMP PE=1 SV=2	4649	85431	207	160	54	51	11047	1	1	1	928.35	1854.69	2	1854.69	0	1	81.57	7e-09	R	NTDEDKWGDACDNCR	S			F80CXA20_2.2753.2753.2
4	P49747	Cartilage oligomeric matrix protein OS=Homo sapiens GN=COMP PE=1 SV=2	4649	85431	207	160	54	51	11313	1	1	0	939.95	1877.88	2	1877.88	0	0	78.87	1.8e-07	K	IDVCPENAEVTLTDFR	A			m84cxa20.6408.6408.2
4	P49747	Cartilage oligomeric matrix protein OS=Homo sapiens GN=COMP PE=1 SV=2	4649	85431	207	160	54	51	11314	1	1	0	939.95	1877.88	2	1877.88	0	0	61.53	9.7e-06	K	IDVCPENAEVTLTDFR	A			m84txa20.6014.6014.2
4	P49747	Cartilage oligomeric matrix protein OS=Homo sapiens GN=COMP PE=1 SV=2	4649	85431	207	160	54	51	11315	1	1	0	626.97	1877.88	3	1877.88	0	0	47.82	0.00023	K	IDVCPENAEVTLTDFR	A			2_F80TXB20.6627.6627.3
4	P49747	Cartilage oligomeric matrix protein OS=Homo sapiens GN=COMP PE=1 SV=2	4649	85431	207	160	54	51	11316	1	1	0	626.97	1877.88	3	1877.88	0	0	30.97	0.011	K	IDVCPENAEVTLTDFR	A			f69txb20.5870.5870.3
4	P49747	Cartilage oligomeric matrix protein OS=Homo sapiens GN=COMP PE=1 SV=2	4649	85431	207	160	54	51	11367	1	1	1	629.26	1884.76	3	1884.76	0	0	43.5	4.5e-05	K	NTVMECDACGMQQSVR	T			2_F80CXA20_2.4048.4048.3
4	P49747	Cartilage oligomeric matrix protein OS=Homo sapiens GN=COMP PE=1 SV=2	4649	85431	207	160	54	51	11368	1	1	1	629.26	1884.76	3	1884.76	0	0	54.04	3.9e-06	K	NTVMECDACGMQQSVR	T			2_F80TXB20.3966.3966.3
4	P49747	Cartilage oligomeric matrix protein OS=Homo sapiens GN=COMP PE=1 SV=2	4649	85431	207	160	54	51	11369	1	1	1	943.39	1884.76	2	1884.76	0	0	110.59	8.7e-12	K	NTVMECDACGMQQSVR	T			F80TXA20.3986.3986.2
4	P49747	Cartilage oligomeric matrix protein OS=Homo sapiens GN=COMP PE=1 SV=2	4649	85431	207	160	54	51	11370	1	1	1	943.39	1884.76	2	1884.76	0	0	111.02	7.9e-12	K	NTVMECDACGMQQSVR	T			F80CXA20_2.4008.4008.2
4	P49747	Cartilage oligomeric matrix protein OS=Homo sapiens GN=COMP PE=1 SV=2	4649	85431	207	160	54	51	11548	1	1	1	634.59	1900.75	3	1900.75	0	0	42.21	6e-05	K	NTVMECDACGMQQSVR	T	Oxidation (M)	0.0000000000100000.0	f69cxb20_100930171645.2695.2695.3
4	P49747	Cartilage oligomeric matrix protein OS=Homo sapiens GN=COMP PE=1 SV=2	4649	85431	207	160	54	51	11549	1	1	1	634.59	1900.75	3	1900.75	0	0	44.06	3.9e-05	K	NTVMECDACGMQQSVR	T	Oxidation (M)	0.0000000000100000.0	2_F80CXA20_1.3060.3060.3
4	P49747	Cartilage oligomeric matrix protein OS=Homo sapiens GN=COMP PE=1 SV=2	4649	85431	207	160	54	51	11550	1	1	1	951.38	1900.75	2	1900.75	0	0	95.12	3.1e-10	K	NTVMECDACGMQQSVR	T	Oxidation (M)	0.0000000000100000.0	f69cxa20.2534.2534.2
4	P49747	Cartilage oligomeric matrix protein OS=Homo sapiens GN=COMP PE=1 SV=2	4649	85431	207	160	54	51	11551	1	1	1	951.38	1900.75	2	1900.75	0	0	75.33	2.9e-08	K	NTVMECDACGMQQSVR	T	Oxidation (M)	0.0000000000100000.0	2_F80CXA20_2.3060.3060.2
4	P49747	Cartilage oligomeric matrix protein OS=Homo sapiens GN=COMP PE=1 SV=2	4649	85431	207	160	54	51	11552	1	1	1	951.39	1900.76	2	1900.75	0	0	97.59	1.7e-10	K	NTVMECDACGMQQSVR	T	Oxidation (M)	0.0001000000000000.0	m84cxb20.2683.2683.2
4	P49747	Cartilage oligomeric matrix protein OS=Homo sapiens GN=COMP PE=1 SV=2	4649	85431	207	160	54	51	11553	1	1	1	951.39	1900.76	2	1900.75	0	0	80.95	8e-09	K	NTVMECDACGMQQSVR	T	Oxidation (M)	0.0001000000000000.0	F80CXA20_2.3191.3191.2
4	P49747	Cartilage oligomeric matrix protein OS=Homo sapiens GN=COMP PE=1 SV=2	4649	85431	207	160	54	51	11727	1	1	1	639.92	1916.75	3	1916.75	0	0	61.42	7.2e-07	K	NTVMECDACGMQQSVR	T	2 Oxidation (M)	0.0001000000100000.0	f69cxa20.1972.1972.3
4	P49747	Cartilage oligomeric matrix protein OS=Homo sapiens GN=COMP PE=1 SV=2	4649	85431	207	160	54	51	11728	1	1	1	639.92	1916.75	3	1916.75	0	0	41.78	6.6e-05	K	NTVMECDACGMQQSVR	T	2 Oxidation (M)	0.0001000000100000.0	m84cxb20.1962.1962.3
4	P49747	Cartilage oligomeric matrix protein OS=Homo sapiens GN=COMP PE=1 SV=2	4649	85431	207	160	54	51	11729	1	1	1	959.38	1916.75	2	1916.75	0	0	84.87	3.3e-09	K	NTVMECDACGMQQSVR	T	2 Oxidation (M)	0.0001000000100000.0	m84cxb20.1960.1960.2
4	P49747	Cartilage oligomeric matrix protein OS=Homo sapiens GN=COMP PE=1 SV=2	4649	85431	207	160	54	51	11730	1	1	1	959.38	1916.75	2	1916.75	0	0	84.72	3.4e-09	K	NTVMECDACGMQQSVR	T	2 Oxidation (M)	0.0001000000100000.0	m84txa20.2105.2105.2
4	P49747	Cartilage oligomeric matrix protein OS=Homo sapiens GN=COMP PE=1 SV=2	4649	85431	207	160	54	51	11908	1	1	1	966.94	1931.86	2	1931.86	0	1	50.79	5.7e-05	R	KDNCVTVPNSGQEDVDR	D			f69cxa20.2487.2487.2
4	P49747	Cartilage oligomeric matrix protein OS=Homo sapiens GN=COMP PE=1 SV=2	4649	85431	207	160	54	51	11909	1	1	1	966.94	1931.86	2	1931.86	0	1	66.79	1.4e-06	R	KDNCVTVPNSGQEDVDR	D			F80TXA20.2923.2923.2
4	P49747	Cartilage oligomeric matrix protein OS=Homo sapiens GN=COMP PE=1 SV=2	4649	85431	207	160	54	51	11910	1	1	1	644.96	1931.87	3	1931.86	0	1	60.9	5.9e-06	R	KDNCVTVPNSGQEDVDR	D			m84txb20.2539.2539.3
4	P49747	Cartilage oligomeric matrix protein OS=Homo sapiens GN=COMP PE=1 SV=2	4649	85431	207	160	54	51	11911	1	1	1	644.96	1931.87	3	1931.86	0	1	46.82	0.00015	R	KDNCVTVPNSGQEDVDR	D			F80CXA20_1.3005.3005.3
4	P49747	Cartilage oligomeric matrix protein OS=Homo sapiens GN=COMP PE=1 SV=2	4649	85431	207	160	54	51	12521	1	1	1	666.69	1997.05	3	1997.05	0	1	53.97	4e-05	R	ELQETNAALQDVRELLR	Q			F80CXA20_2.7371.7371.3
4	P49747	Cartilage oligomeric matrix protein OS=Homo sapiens GN=COMP PE=1 SV=2	4649	85431	207	160	54	51	12522	1	1	1	666.69	1997.05	3	1997.05	0	1	57.81	1.6e-05	R	ELQETNAALQDVRELLR	Q			F80TXA20.7426.7426.3
4	P49747	Cartilage oligomeric matrix protein OS=Homo sapiens GN=COMP PE=1 SV=2	4649	85431	207	160	54	51	12725	1	1	1	1008.91	2015.8	2	2015.8	0	0	64.32	4.3e-07	R	DGIGDACDPDADGDGVPNEK	D			f69txa20.3368.3368.2
4	P49747	Cartilage oligomeric matrix protein OS=Homo sapiens GN=COMP PE=1 SV=2	4649	85431	207	160	54	51	12726	1	1	1	1008.91	2015.8	2	2015.8	0	0	50.04	1.1e-05	R	DGIGDACDPDADGDGVPNEK	D			f69cxa20.3227.3227.2
4	P49747	Cartilage oligomeric matrix protein OS=Homo sapiens GN=COMP PE=1 SV=2	4649	85431	207	160	54	51	13210	1	1	1	689.69	2066.04	3	2066.04	0	0	41.25	0.00098	R	LGVFCFSQENIIWANLR	Y			F80CXA20_1.8551.8551.3
4	P49747	Cartilage oligomeric matrix protein OS=Homo sapiens GN=COMP PE=1 SV=2	4649	85431	207	160	54	51	13211	1	1	1	689.69	2066.04	3	2066.04	0	0	41.5	0.00092	R	LGVFCFSQENIIWANLR	Y			2_F80TXB20.8513.8513.3
4	P49747	Cartilage oligomeric matrix protein OS=Homo sapiens GN=COMP PE=1 SV=2	4649	85431	207	160	54	51	13212	1	1	1	1034.03	2066.04	2	2066.04	0	0	70.49	1.2e-06	R	LGVFCFSQENIIWANLR	Y			F80CXA20_1.8550.8550.2
4	P49747	Cartilage oligomeric matrix protein OS=Homo sapiens GN=COMP PE=1 SV=2	4649	85431	207	160	54	51	13213	1	1	1	1034.03	2066.04	2	2066.04	0	0	73.42	5.9e-07	R	LGVFCFSQENIIWANLR	Y			2_F80CXA20_1.8506.8506.2
4	P49747	Cartilage oligomeric matrix protein OS=Homo sapiens GN=COMP PE=1 SV=2	4649	85431	207	160	54	51	13376	1	1	1	697.31	2088.92	3	2088.92	0	1	26.94	0.0077	R	CNDTIPEDYETHQLRQA	-			m84cxb20.3533.3533.3
4	P49747	Cartilage oligomeric matrix protein OS=Homo sapiens GN=COMP PE=1 SV=2	4649	85431	207	160	54	51	13377	1	1	1	697.31	2088.92	3	2088.92	0	1	18.1	0.059	R	CNDTIPEDYETHQLRQA	-			f69txb20.3529.3529.3
4	P49747	Cartilage oligomeric matrix protein OS=Homo sapiens GN=COMP PE=1 SV=2	4649	85431	207	160	54	51	13478	1	1	1	702.7	2105.09	3	2105.11	-0.02	1	15.32	0.34	K	SYRWFLQHRPQVGYIR	V			2_F80CXA20_1.5415.5415.3
4	P49747	Cartilage oligomeric matrix protein OS=Homo sapiens GN=COMP PE=1 SV=2	4649	85431	207	160	54	51	13479	1	1	1	527.28	2105.11	4	2105.11	0	1	24.94	0.031	K	SYRWFLQHRPQVGYIR	V			F80CXA20_1.5440.5440.4
4	P49747	Cartilage oligomeric matrix protein OS=Homo sapiens GN=COMP PE=1 SV=2	4649	85431	207	160	54	51	13480	1	1	1	527.28	2105.11	4	2105.11	0	1	25.74	0.025	K	SYRWFLQHRPQVGYIR	V			F80CXA20_2.5374.5374.4
4	P49747	Cartilage oligomeric matrix protein OS=Homo sapiens GN=COMP PE=1 SV=2	4649	85431	207	160	54	51	13481	1	1	1	422.03	2105.11	5	2105.11	0	1	24.77	0.029	K	SYRWFLQHRPQVGYIR	V			2_F80CXA20_1.5427.5427.5
4	P49747	Cartilage oligomeric matrix protein OS=Homo sapiens GN=COMP PE=1 SV=2	4649	85431	207	160	54	51	13482	1	1	1	422.03	2105.11	5	2105.11	0	1	14.85	0.29	K	SYRWFLQHRPQVGYIR	V			F80CXA20_1.5448.5448.5
4	P49747	Cartilage oligomeric matrix protein OS=Homo sapiens GN=COMP PE=1 SV=2	4649	85431	207	160	54	51	14266	1	1	1	737.34	2208.99	3	2208.99	0	1	41.62	0.00051	R	YRCNDTIPEDYETHQLR	Q			F80TXA20.3844.3844.3
4	P49747	Cartilage oligomeric matrix protein OS=Homo sapiens GN=COMP PE=1 SV=2	4649	85431	207	160	54	51	14267	1	1	1	737.34	2208.99	3	2208.99	0	1	31.53	0.0052	R	YRCNDTIPEDYETHQLR	Q			2_F80CXA20_2.3893.3893.3
4	P49747	Cartilage oligomeric matrix protein OS=Homo sapiens GN=COMP PE=1 SV=2	4649	85431	207	160	54	51	14268	1	1	1	553.26	2209	4	2208.99	0.01	1	7.83	1.5	R	YRCNDTIPEDYETHQLR	Q			m84cxb20.3322.3322.4
4	P49747	Cartilage oligomeric matrix protein OS=Homo sapiens GN=COMP PE=1 SV=2	4649	85431	207	160	54	51	14269	1	1	1	553.26	2209	4	2208.99	0.01	1	4.24	3.4	R	YRCNDTIPEDYETHQLR	Q			m84txa20.3397.3397.4
4	P49747	Cartilage oligomeric matrix protein OS=Homo sapiens GN=COMP PE=1 SV=2	4649	85431	207	160	54	51	14598	1	1	1	752.7	2255.08	3	2255.08	0	0	59.65	1.1e-05	R	FYEGPELVADSNVVLDTTMR	G			m84txb20.6759.6759.3
4	P49747	Cartilage oligomeric matrix protein OS=Homo sapiens GN=COMP PE=1 SV=2	4649	85431	207	160	54	51	14599	1	1	1	752.7	2255.08	3	2255.08	0	0	50.05	0.0001	R	FYEGPELVADSNVVLDTTMR	G			m84txb20.6656.6656.3
4	P49747	Cartilage oligomeric matrix protein OS=Homo sapiens GN=COMP PE=1 SV=2	4649	85431	207	160	54	51	14600	1	1	1	1128.55	2255.08	2	2255.08	0	0	79.87	1e-07	R	FYEGPELVADSNVVLDTTMR	G			m84txb20.6745.6745.2
4	P49747	Cartilage oligomeric matrix protein OS=Homo sapiens GN=COMP PE=1 SV=2	4649	85431	207	160	54	51	14601	1	1	1	1128.55	2255.08	2	2255.08	0	0	67.8	1.7e-06	R	FYEGPELVADSNVVLDTTMR	G			m84cxb20.6564.6564.2
4	P49747	Cartilage oligomeric matrix protein OS=Homo sapiens GN=COMP PE=1 SV=2	4649	85431	207	160	54	51	14964	1	1	1	1152.53	2303.05	2	2303.05	0	0	60.8	5.5e-06	R	CEACPPGYSGPTHQGVGLAFAK	A			f69txb20.4315.4315.2
4	P49747	Cartilage oligomeric matrix protein OS=Homo sapiens GN=COMP PE=1 SV=2	4649	85431	207	160	54	51	14965	1	1	1	1152.53	2303.05	2	2303.05	0	0	65.45	1.9e-06	R	CEACPPGYSGPTHQGVGLAFAK	A			m84txb20.4393.4393.2
4	P49747	Cartilage oligomeric matrix protein OS=Homo sapiens GN=COMP PE=1 SV=2	4649	85431	207	160	54	51	14966	1	1	1	768.69	2303.05	3	2303.05	0	0	30.74	0.0055	R	CEACPPGYSGPTHQGVGLAFAK	A			m84txb20.4527.4527.3
4	P49747	Cartilage oligomeric matrix protein OS=Homo sapiens GN=COMP PE=1 SV=2	4649	85431	207	160	54	51	14967	1	1	1	768.69	2303.05	3	2303.05	0	0	31.52	0.0046	R	CEACPPGYSGPTHQGVGLAFAK	A			2_F80TXB20.4938.4938.3
4	P49747	Cartilage oligomeric matrix protein OS=Homo sapiens GN=COMP PE=1 SV=2	4649	85431	207	160	54	51	15097	1	1	1	1160.57	2319.12	2	2319.14	-0.02	1	44.11	0.00038	K	VVDKIDVCPENAEVTLTDFR	A			2_F80TXA20.6541.6541.2
4	P49747	Cartilage oligomeric matrix protein OS=Homo sapiens GN=COMP PE=1 SV=2	4649	85431	207	160	54	51	15098	1	1	1	1160.57	2319.12	2	2319.14	-0.02	1	45.74	0.00026	K	VVDKIDVCPENAEVTLTDFR	A			2_F80TXB20.6396.6396.2
4	P49747	Cartilage oligomeric matrix protein OS=Homo sapiens GN=COMP PE=1 SV=2	4649	85431	207	160	54	51	15623	1	1	1	800.67	2398.99	3	2398.98	0	0	11.4	0.091	R	GSFQCGPCQPGFVGDQASGCQR	R			f69txb20.6521.6521.3
4	P49747	Cartilage oligomeric matrix protein OS=Homo sapiens GN=COMP PE=1 SV=2	4649	85431	207	160	54	51	15624	1	1	1	1200.5	2398.99	2	2398.98	0	0	97.65	2.1e-10	R	GSFQCGPCQPGFVGDQASGCQR	R			F80TXA20.4446.4446.2
4	P49747	Cartilage oligomeric matrix protein OS=Homo sapiens GN=COMP PE=1 SV=2	4649	85431	207	160	54	51	15625	1	1	1	1200.5	2398.99	2	2398.98	0	0	96.84	2.5e-10	R	GSFQCGPCQPGFVGDQASGCQR	R			2_F80TXB20.4393.4393.2
4	P49747	Cartilage oligomeric matrix protein OS=Homo sapiens GN=COMP PE=1 SV=2	4649	85431	207	160	54	51	15626	1	1	1	800.67	2398.99	3	2398.98	0	0	44.8	4.5e-05	R	GSFQCGPCQPGFVGDQASGCQR	R			f69cxb20.4009.4009.3
4	P49747	Cartilage oligomeric matrix protein OS=Homo sapiens GN=COMP PE=1 SV=2	4649	85431	207	160	54	51	15627	1	1	1	800.67	2398.99	3	2398.98	0	0	54.36	4.9e-06	R	GSFQCGPCQPGFVGDQASGCQR	R			f69cxb20_100930171645.3970.3970.3
4	P49747	Cartilage oligomeric matrix protein OS=Homo sapiens GN=COMP PE=1 SV=2	4649	85431	207	160	54	51	15628	1	1	1	1200.51	2399	2	2398.98	0.02	0	48.36	2.3e-05	R	GSFQCGPCQPGFVGDQASGCQR	R			m84txb20.4711.4711.2
4	P49747	Cartilage oligomeric matrix protein OS=Homo sapiens GN=COMP PE=1 SV=2	4649	85431	207	160	54	51	15629	1	1	1	1200.51	2399	2	2398.98	0.02	0	41.52	0.00011	R	GSFQCGPCQPGFVGDQASGCQR	R			f69cxb20.4897.4897.2
4	P49747	Cartilage oligomeric matrix protein OS=Homo sapiens GN=COMP PE=1 SV=2	4649	85431	207	160	54	51	15632	1	1	1	1201.48	2400.95	2	2400.95	0	0	29.13	0.0012	R	FCPDGSPSECHEHADCVLER	D			f69txa20.3188.3188.2
4	P49747	Cartilage oligomeric matrix protein OS=Homo sapiens GN=COMP PE=1 SV=2	4649	85431	207	160	54	51	15633	1	1	1	1201.48	2400.95	2	2400.95	0	0	49.32	1.2e-05	R	FCPDGSPSECHEHADCVLER	D			f69txb20.2985.2985.2
4	P49747	Cartilage oligomeric matrix protein OS=Homo sapiens GN=COMP PE=1 SV=2	4649	85431	207	160	54	51	15636	1	1	1	801.33	2400.96	3	2400.95	0	0	11.97	0.064	R	FCPDGSPSECHEHADCVLER	D			f69cxb20_100930171645.3190.3190.3
4	P49747	Cartilage oligomeric matrix protein OS=Homo sapiens GN=COMP PE=1 SV=2	4649	85431	207	160	54	51	15637	1	1	1	801.33	2400.96	3	2400.95	0	0	11.43	0.072	R	FCPDGSPSECHEHADCVLER	D			m84txb20.3090.3090.3
4	P49747	Cartilage oligomeric matrix protein OS=Homo sapiens GN=COMP PE=1 SV=2	4649	85431	207	160	54	51	15638	1	1	1	601.25	2400.96	4	2400.95	0	0	12.09	0.062	R	FCPDGSPSECHEHADCVLER	D			F80TXB20.3566.3566.4
4	P49747	Cartilage oligomeric matrix protein OS=Homo sapiens GN=COMP PE=1 SV=2	4649	85431	207	160	54	51	15639	1	1	1	601.25	2400.96	4	2400.95	0	0	18.32	0.015	R	FCPDGSPSECHEHADCVLER	D			m84cxb20.3032.3032.4
4	P49747	Cartilage oligomeric matrix protein OS=Homo sapiens GN=COMP PE=1 SV=2	4649	85431	207	160	54	51	16385	1	1	1	1263.61	2525.21	2	2525.22	-0.01	1	12.11	0.7	R	FYEGPELVADSNVVLDTTMRGGR	L			F80TXA20.7239.7239.2
4	P49747	Cartilage oligomeric matrix protein OS=Homo sapiens GN=COMP PE=1 SV=2	4649	85431	207	160	54	51	16386	1	1	1	842.75	2525.22	3	2525.22	0	1	0.36	11	R	FYEGPELVADSNVVLDTTMRGGR	L			f69txb20.6426.6426.3
4	P49747	Cartilage oligomeric matrix protein OS=Homo sapiens GN=COMP PE=1 SV=2	4649	85431	207	160	54	51	16554	1	1	1	852.7	2555.09	3	2555.09	0	1	49.02	3.1e-05	R	GSFQCGPCQPGFVGDQASGCQRR	A			F80TXB20.4133.4133.3
4	P49747	Cartilage oligomeric matrix protein OS=Homo sapiens GN=COMP PE=1 SV=2	4649	85431	207	160	54	51	16555	1	1	1	852.7	2555.09	3	2555.09	0	1	61.1	1.9e-06	R	GSFQCGPCQPGFVGDQASGCQRR	A			2_F80TXB20.4089.4089.3
4	P49747	Cartilage oligomeric matrix protein OS=Homo sapiens GN=COMP PE=1 SV=2	4649	85431	207	160	54	51	16745	1	1	1	1296.53	2591.05	2	2591.05	0	1	54.28	4.9e-06	R	VPNSDQKDSDGDGIGDACDNCPQK	S			f69txa20.2288.2288.2
4	P49747	Cartilage oligomeric matrix protein OS=Homo sapiens GN=COMP PE=1 SV=2	4649	85431	207	160	54	51	16746	1	1	1	1296.53	2591.05	2	2591.05	0	1	19.65	0.014	R	VPNSDQKDSDGDGIGDACDNCPQK	S			f69cxa20.2133.2133.2
4	P49747	Cartilage oligomeric matrix protein OS=Homo sapiens GN=COMP PE=1 SV=2	4649	85431	207	160	54	51	16747	1	1	1	864.69	2591.05	3	2591.05	0	1	37.81	0.00022	R	VPNSDQKDSDGDGIGDACDNCPQK	S			2_F80TXB20.2515.2515.3
4	P49747	Cartilage oligomeric matrix protein OS=Homo sapiens GN=COMP PE=1 SV=2	4649	85431	207	160	54	51	16748	1	1	1	864.69	2591.05	3	2591.05	0	1	35.02	0.00041	R	VPNSDQKDSDGDGIGDACDNCPQK	S			2_F80TXA20.2625.2625.3
4	P49747	Cartilage oligomeric matrix protein OS=Homo sapiens GN=COMP PE=1 SV=2	4649	85431	207	160	54	51	16867	1	1	1	873.07	2616.18	3	2616.18	0	1	42.8	0.0003	R	EITFLKNTVMECDACGMQQSVR	T			f69cxa20.5565.5565.3
4	P49747	Cartilage oligomeric matrix protein OS=Homo sapiens GN=COMP PE=1 SV=2	4649	85431	207	160	54	51	16868	1	1	1	873.07	2616.18	3	2616.18	0	1	41.48	0.00041	R	EITFLKNTVMECDACGMQQSVR	T			F80TXB20.6204.6204.3
4	P49747	Cartilage oligomeric matrix protein OS=Homo sapiens GN=COMP PE=1 SV=2	4649	85431	207	160	54	51	16869	1	1	1	1309.1	2616.19	2	2616.18	0.01	1	58.87	7.4e-06	R	EITFLKNTVMECDACGMQQSVR	T			2_F80CXA20_1.6237.6237.2
4	P49747	Cartilage oligomeric matrix protein OS=Homo sapiens GN=COMP PE=1 SV=2	4649	85431	207	160	54	51	16899	1	1	1	876.09	2625.25	3	2625.25	0	1	22.37	0.059	K	SSTGPGEQLRNALWHTGDTESQVR	L			2_F80CXA20_1.5447.5447.3
4	P49747	Cartilage oligomeric matrix protein OS=Homo sapiens GN=COMP PE=1 SV=2	4649	85431	207	160	54	51	16900	1	1	1	876.09	2625.25	3	2625.25	0	1	32.57	0.0056	K	SSTGPGEQLRNALWHTGDTESQVR	L			F80TXA20.5439.5439.3
4	P49747	Cartilage oligomeric matrix protein OS=Homo sapiens GN=COMP PE=1 SV=2	4649	85431	207	160	54	51	17329	1	1	1	919.72	2756.15	3	2756.15	0	1	38.93	0.00014	R	AQRFCPDGSPSECHEHADCVLER	D			2_F80TXB20.3383.3383.3
4	P49747	Cartilage oligomeric matrix protein OS=Homo sapiens GN=COMP PE=1 SV=2	4649	85431	207	160	54	51	17330	1	1	1	919.72	2756.15	3	2756.15	0	1	25.98	0.0028	R	AQRFCPDGSPSECHEHADCVLER	D			m84cxb20.2920.2920.3
4	P49747	Cartilage oligomeric matrix protein OS=Homo sapiens GN=COMP PE=1 SV=2	4649	85431	207	160	54	51	17331	1	1	1	552.24	2756.15	5	2756.15	0	1	14.86	0.042	R	AQRFCPDGSPSECHEHADCVLER	D			m84cxb20.2935.2935.5
4	P49747	Cartilage oligomeric matrix protein OS=Homo sapiens GN=COMP PE=1 SV=2	4649	85431	207	160	54	51	17332	1	1	1	552.24	2756.15	5	2756.15	0	1	14.6	0.045	R	AQRFCPDGSPSECHEHADCVLER	D			f69cxb20.3091.3091.5
4	P49747	Cartilage oligomeric matrix protein OS=Homo sapiens GN=COMP PE=1 SV=2	4649	85431	207	160	54	51	17333	1	1	1	690.04	2756.15	4	2756.15	0	1	26.56	0.0029	R	AQRFCPDGSPSECHEHADCVLER	D			2_F80CXA20_2.3448.3448.4
4	P49747	Cartilage oligomeric matrix protein OS=Homo sapiens GN=COMP PE=1 SV=2	4649	85431	207	160	54	51	17576	1	1	1	1409.07	2816.13	2	2816.13	0	1	0.46	0.9	R	FCPDGSPSECHEHADCVLERDGSR	S			2_F80TXA20.3398.3398.2
4	P49747	Cartilage oligomeric matrix protein OS=Homo sapiens GN=COMP PE=1 SV=2	4649	85431	207	160	54	51	17578	1	1	1	939.72	2816.14	3	2816.13	0	1	38.49	0.00014	R	FCPDGSPSECHEHADCVLERDGSR	S			2_F80TXA20.3383.3383.3
4	P49747	Cartilage oligomeric matrix protein OS=Homo sapiens GN=COMP PE=1 SV=2	4649	85431	207	160	54	51	17579	1	1	1	939.72	2816.14	3	2816.13	0	1	25.96	0.0025	R	FCPDGSPSECHEHADCVLERDGSR	S			F80TXB20.3317.3317.3
4	P49747	Cartilage oligomeric matrix protein OS=Homo sapiens GN=COMP PE=1 SV=2	4649	85431	207	160	54	51	17581	1	1	1	705.04	2816.14	4	2816.13	0	1	4.27	0.37	R	FCPDGSPSECHEHADCVLERDGSR	S			2_F80CXA20_1.3337.3337.4
4	P49747	Cartilage oligomeric matrix protein OS=Homo sapiens GN=COMP PE=1 SV=2	4649	85431	207	160	54	51	17583	1	1	1	564.23	2816.14	5	2816.13	0	1	8.22	0.15	R	FCPDGSPSECHEHADCVLERDGSR	S			2_F80TXB20.3261.3261.5
4	P49747	Cartilage oligomeric matrix protein OS=Homo sapiens GN=COMP PE=1 SV=2	4649	85431	207	160	54	51	17808	1	1	1	1441.23	2880.44	2	2880.44	0	0	63.9	3.3e-06	R	AFQTVVLDPEGDAQIDPNWVVLNQGR	E			f69cxa20_100930142853.6971.6971.2
4	P49747	Cartilage oligomeric matrix protein OS=Homo sapiens GN=COMP PE=1 SV=2	4649	85431	207	160	54	51	17809	1	1	1	1441.23	2880.44	2	2880.44	0	0	83.78	3.4e-08	R	AFQTVVLDPEGDAQIDPNWVVLNQGR	E			m84txb20.6834.6834.2
4	P49747	Cartilage oligomeric matrix protein OS=Homo sapiens GN=COMP PE=1 SV=2	4649	85431	207	160	54	51	17810	1	1	1	721.12	2880.44	4	2880.44	0	0	31.64	0.0053	R	AFQTVVLDPEGDAQIDPNWVVLNQGR	E			f69cxb20_100930171645.6998.6998.4
4	P49747	Cartilage oligomeric matrix protein OS=Homo sapiens GN=COMP PE=1 SV=2	4649	85431	207	160	54	51	17811	1	1	1	721.12	2880.44	4	2880.44	0	0	32.74	0.0041	R	AFQTVVLDPEGDAQIDPNWVVLNQGR	E			f69txb20.6794.6794.4
4	P49747	Cartilage oligomeric matrix protein OS=Homo sapiens GN=COMP PE=1 SV=2	4649	85431	207	160	54	51	17812	1	1	1	961.16	2880.45	3	2880.44	0.01	0	42.58	0.0005	R	AFQTVVLDPEGDAQIDPNWVVLNQGR	E			m84cxb20.6712.6712.3
4	P49747	Cartilage oligomeric matrix protein OS=Homo sapiens GN=COMP PE=1 SV=2	4649	85431	207	160	54	51	17813	1	1	1	961.16	2880.45	3	2880.44	0.01	0	46.13	0.00022	R	AFQTVVLDPEGDAQIDPNWVVLNQGR	E			f69cxb20.7015.7015.3
4	P49747	Cartilage oligomeric matrix protein OS=Homo sapiens GN=COMP PE=1 SV=2	4649	85431	207	160	54	51	18435	1	1	1	1023.79	3068.35	3	3068.34	0	1	54.06	1e-05	R	SCVCAVGWAGNGILCGRDTDLDGFPDEK	L			F80TXA20.6855.6855.3
4	P49747	Cartilage oligomeric matrix protein OS=Homo sapiens GN=COMP PE=1 SV=2	4649	85431	207	160	54	51	18436	1	1	1	1023.79	3068.35	3	3068.34	0	1	54.26	9.7e-06	R	SCVCAVGWAGNGILCGRDTDLDGFPDEK	L			f69txa20.6410.6410.3
4	P49747	Cartilage oligomeric matrix protein OS=Homo sapiens GN=COMP PE=1 SV=2	4649	85431	207	160	54	51	18540	1	1	1	1035.78	3104.31	3	3104.32	0	0	32.08	0.0009	K	QVCTDINECETGQHNCVPNSVCINTR	G			m84txb20.7639.7639.3
4	P49747	Cartilage oligomeric matrix protein OS=Homo sapiens GN=COMP PE=1 SV=2	4649	85431	207	160	54	51	18541	1	1	1	1035.78	3104.31	3	3104.32	0	0	31.95	0.00093	K	QVCTDINECETGQHNCVPNSVCINTR	G			m84txb20.7515.7515.3
4	P49747	Cartilage oligomeric matrix protein OS=Homo sapiens GN=COMP PE=1 SV=2	4649	85431	207	160	54	51	18542	1	1	1	1553.17	3104.32	2	3104.32	0	0	16.43	0.039	K	QVCTDINECETGQHNCVPNSVCINTR	G			f69txa20.3918.3918.2
4	P49747	Cartilage oligomeric matrix protein OS=Homo sapiens GN=COMP PE=1 SV=2	4649	85431	207	160	54	51	18543	1	1	1	1553.17	3104.32	2	3104.32	0	0	35.58	0.00047	K	QVCTDINECETGQHNCVPNSVCINTR	G			2_F80CXA20_1.4318.4318.2
4	P49747	Cartilage oligomeric matrix protein OS=Homo sapiens GN=COMP PE=1 SV=2	4649	85431	207	160	54	51	18544	1	1	1	777.09	3104.32	4	3104.32	0	0	6.34	0.39	K	QVCTDINECETGQHNCVPNSVCINTR	G			F80TXA20.4261.4261.4
4	P49747	Cartilage oligomeric matrix protein OS=Homo sapiens GN=COMP PE=1 SV=2	4649	85431	207	160	54	51	18545	1	1	1	777.09	3104.32	4	3104.32	0	0	16.29	0.04	K	QVCTDINECETGQHNCVPNSVCINTR	G			2_F80TXA20.4353.4353.4
4	P49747	Cartilage oligomeric matrix protein OS=Homo sapiens GN=COMP PE=1 SV=2	4649	85431	207	160	54	51	18546	1	1	1	1035.78	3104.32	3	3104.32	0.01	0	57.79	3.1e-06	K	QVCTDINECETGQHNCVPNSVCINTR	G			f69cxa20.3721.3721.3
4	P49747	Cartilage oligomeric matrix protein OS=Homo sapiens GN=COMP PE=1 SV=2	4649	85431	207	160	54	51	18547	1	1	1	1035.78	3104.32	3	3104.32	0.01	0	37.29	0.00035	K	QVCTDINECETGQHNCVPNSVCINTR	G			2_F80TXA20.4352.4352.3
4	P49747	Cartilage oligomeric matrix protein OS=Homo sapiens GN=COMP PE=1 SV=2	4649	85431	207	160	54	51	19050	1	1	1	819.83	3275.29	4	3275.28	0	0	13.45	0.045	R	CGPCPAGFTGNGSHCTDVNECNAHPCFPR	V			2_F80CXA20_2.4323.4323.4
4	P49747	Cartilage oligomeric matrix protein OS=Homo sapiens GN=COMP PE=1 SV=2	4649	85431	207	160	54	51	19051	1	1	1	819.83	3275.29	4	3275.28	0	0	15.24	0.03	R	CGPCPAGFTGNGSHCTDVNECNAHPCFPR	V			F80CXA20_2.4278.4278.4
4	P49747	Cartilage oligomeric matrix protein OS=Homo sapiens GN=COMP PE=1 SV=2	4649	85431	207	160	54	51	19249	1	1	1	1119.22	3354.64	3	3354.64	0	0	38.04	0.0012	R	TGLPSVRPLLHCAPGFCFPGVACIQTESGAR	C			f69cxb20.6664.6664.3
4	P49747	Cartilage oligomeric matrix protein OS=Homo sapiens GN=COMP PE=1 SV=2	4649	85431	207	160	54	51	19250	1	1	1	1119.22	3354.64	3	3354.64	0	0	17.38	0.14	R	TGLPSVRPLLHCAPGFCFPGVACIQTESGAR	C			m84cxb20.6378.6378.3
4	P49747	Cartilage oligomeric matrix protein OS=Homo sapiens GN=COMP PE=1 SV=2	4649	85431	207	160	54	51	19252	1	1	1	839.67	3354.65	4	3354.64	0	0	42.86	0.0004	R	TGLPSVRPLLHCAPGFCFPGVACIQTESGAR	C			2_F80CXA20_2.7245.7245.4
4	P49747	Cartilage oligomeric matrix protein OS=Homo sapiens GN=COMP PE=1 SV=2	4649	85431	207	160	54	51	19409	1	1	1	855.38	3417.49	4	3417.49	0	1	30.62	0.002	K	ANKQVCTDINECETGQHNCVPNSVCINTR	G			2_F80TXB20.3948.3948.4
4	P49747	Cartilage oligomeric matrix protein OS=Homo sapiens GN=COMP PE=1 SV=2	4649	85431	207	160	54	51	19410	1	1	1	855.38	3417.49	4	3417.49	0	1	25.31	0.0068	K	ANKQVCTDINECETGQHNCVPNSVCINTR	G			F80TXB20.3989.3989.4
4	P49747	Cartilage oligomeric matrix protein OS=Homo sapiens GN=COMP PE=1 SV=2	4649	85431	207	160	54	51	19411	1	1	1	1140.17	3417.49	3	3417.49	0	1	28.81	0.003	K	ANKQVCTDINECETGQHNCVPNSVCINTR	G			2_F80TXA20.4065.4065.3
4	P49747	Cartilage oligomeric matrix protein OS=Homo sapiens GN=COMP PE=1 SV=2	4649	85431	207	160	54	51	19412	1	1	1	1140.17	3417.49	3	3417.49	0	1	14.36	0.084	K	ANKQVCTDINECETGQHNCVPNSVCINTR	G			F80TXA20.3968.3968.3
4	P49747	Cartilage oligomeric matrix protein OS=Homo sapiens GN=COMP PE=1 SV=2	4649	85431	207	160	54	51	19685	1	1	1	880.09	3516.33	4	3516.33	0	0	24.14	0.0039	K	SNPDQADVDHDFVGDACDSDQDQDGDGHQDSR	D			f69cxb20.3366.3366.4
4	P49747	Cartilage oligomeric matrix protein OS=Homo sapiens GN=COMP PE=1 SV=2	4649	85431	207	160	54	51	19686	1	1	1	880.09	3516.33	4	3516.33	0	0	13.64	0.043	K	SNPDQADVDHDFVGDACDSDQDQDGDGHQDSR	D			f69cxb20_100930171645.3324.3324.4
4	P49747	Cartilage oligomeric matrix protein OS=Homo sapiens GN=COMP PE=1 SV=2	4649	85431	207	160	54	51	19687	1	1	1	1173.12	3516.33	3	3516.33	0	0	34.98	0.00032	K	SNPDQADVDHDFVGDACDSDQDQDGDGHQDSR	D			f69cxa20.3221.3221.3
4	P49747	Cartilage oligomeric matrix protein OS=Homo sapiens GN=COMP PE=1 SV=2	4649	85431	207	160	54	51	19688	1	1	1	1173.12	3516.33	3	3516.33	0	0	51.27	7.5e-06	K	SNPDQADVDHDFVGDACDSDQDQDGDGHQDSR	D			f69cxb20.3368.3368.3
4	P49747	Cartilage oligomeric matrix protein OS=Homo sapiens GN=COMP PE=1 SV=2	4649	85431	207	160	54	51	20385	1	1	1	976.86	3903.42	4	3903.42	0	0	12.87	0.052	R	DNCPTVPNSAQEDSDHDGQGDACDDDDDNDGVPDSR	D			F80TXA20.3218.3218.4
4	P49747	Cartilage oligomeric matrix protein OS=Homo sapiens GN=COMP PE=1 SV=2	4649	85431	207	160	54	51	20386	1	1	1	976.86	3903.42	4	3903.42	0	0	0.21	0.95	R	DNCPTVPNSAQEDSDHDGQGDACDDDDDNDGVPDSR	D			f69txb20.2729.2729.4
4	P49747	Cartilage oligomeric matrix protein OS=Homo sapiens GN=COMP PE=1 SV=2	4649	85431	207	160	54	51	20387	1	1	1	1302.15	3903.42	3	3903.42	0	0	41.62	6.9e-05	R	DNCPTVPNSAQEDSDHDGQGDACDDDDDNDGVPDSR	D			f69cxa20_100930142853.2796.2796.3
4	P49747	Cartilage oligomeric matrix protein OS=Homo sapiens GN=COMP PE=1 SV=2	4649	85431	207	160	54	51	20388	1	1	1	1302.15	3903.42	3	3903.42	0	0	22.74	0.0053	R	DNCPTVPNSAQEDSDHDGQGDACDDDDDNDGVPDSR	D			m84txa20.2872.2872.3
4	P49747	Cartilage oligomeric matrix protein OS=Homo sapiens GN=COMP PE=1 SV=2	4649	85431	207	160	54	51	20918	1	1	1	1483.88	4448.62	3	4448.62	0	1	36.19	0.00024	R	DNCPTVPNSAQEDSDHDGQGDACDDDDDNDGVPDSRDNCR	L			F80TXA20.2997.2997.3
4	P49747	Cartilage oligomeric matrix protein OS=Homo sapiens GN=COMP PE=1 SV=2	4649	85431	207	160	54	51	20919	1	1	1	1483.88	4448.62	3	4448.62	0	1	47.39	1.8e-05	R	DNCPTVPNSAQEDSDHDGQGDACDDDDDNDGVPDSRDNCR	L			2_F80TXA20.3089.3089.3
4	P49747	Cartilage oligomeric matrix protein OS=Homo sapiens GN=COMP PE=1 SV=2	4649	85431	207	160	54	51	20920	1	1	1	1113.16	4448.63	4	4448.62	0	1	35.94	0.00025	R	DNCPTVPNSAQEDSDHDGQGDACDDDDDNDGVPDSRDNCR	L			f69cxa20.2557.2557.4
4	P49747	Cartilage oligomeric matrix protein OS=Homo sapiens GN=COMP PE=1 SV=2	4649	85431	207	160	54	51	20921	1	1	1	1113.16	4448.63	4	4448.62	0	1	28.54	0.0014	R	DNCPTVPNSAQEDSDHDGQGDACDDDDDNDGVPDSRDNCR	L			F80CXA20_2.3031.3031.4
4	P49747	Cartilage oligomeric matrix protein OS=Homo sapiens GN=COMP PE=1 SV=2	4649	85431	207	160	54	51	21521	1	1	1	1065.2	5320.98	5	5320.99	-0.01	1	25.3	0.003	K	DSDGDGIGDACDNCPQKSNPDQADVDHDFVGDACDSDQDQDGDGHQDSR	D			f69cxa20.3523.3523.5
4	P49747	Cartilage oligomeric matrix protein OS=Homo sapiens GN=COMP PE=1 SV=2	4649	85431	207	160	54	51	21522	1	1	1	1065.2	5320.98	5	5320.99	-0.01	1	6.94	0.2	K	DSDGDGIGDACDNCPQKSNPDQADVDHDFVGDACDSDQDQDGDGHQDSR	D			F80CXA20_2.4072.4072.5
4	P49747	Cartilage oligomeric matrix protein OS=Homo sapiens GN=COMP PE=1 SV=2	4649	85431	207	160	54	51	21523	1	1	1	1331.26	5321	4	5320.99	0.01	1	7.37	0.18	K	DSDGDGIGDACDNCPQKSNPDQADVDHDFVGDACDSDQDQDGDGHQDSR	D			2_F80TXA20.4168.4168.4
4	P49747	Cartilage oligomeric matrix protein OS=Homo sapiens GN=COMP PE=1 SV=2	4649	85431	207	160	54	51	21524	1	1	1	1331.26	5321	4	5320.99	0.01	1	15.54	0.028	K	DSDGDGIGDACDNCPQKSNPDQADVDHDFVGDACDSDQDQDGDGHQDSR	D			2_F80CXA20_2.4103.4103.4
5	O75339	Cartilage intermediate layer protein 1 OS=Homo sapiens GN=CILP PE=1 SV=4	3425	134761	201	149	69	59	628	1	1	1	410.68	819.36	2	819.36	0	0	17.13	0.14	R	FYYGDR	V			f69cxa20.2806.2806.2
5	O75339	Cartilage intermediate layer protein 1 OS=Homo sapiens GN=CILP PE=1 SV=4	3425	134761	201	149	69	59	629	1	1	1	410.68	819.36	2	819.36	0	0	17.31	0.13	R	FYYGDR	V			F80CXA20_2.3320.3320.2
5	O75339	Cartilage intermediate layer protein 1 OS=Homo sapiens GN=CILP PE=1 SV=4	3425	134761	201	149	69	59	826	1	1	1	423.72	845.42	2	845.42	0	0	23.02	0.097	K	AQSDAGAVK	S			f69txa20.1331.1331.2
5	O75339	Cartilage intermediate layer protein 1 OS=Homo sapiens GN=CILP PE=1 SV=4	3425	134761	201	149	69	59	827	1	1	1	423.72	845.42	2	845.42	0	0	5.28	5.8	K	AQSDAGAVK	S			2_F80CXA20_2.1433.1433.2
5	O75339	Cartilage intermediate layer protein 1 OS=Homo sapiens GN=CILP PE=1 SV=4	3425	134761	201	149	69	59	996	1	1	1	435.19	868.37	2	868.37	0	0	3.15	1.6	R	TDHEDPR	V			F80CXA20_2.1155.1155.2
5	O75339	Cartilage intermediate layer protein 1 OS=Homo sapiens GN=CILP PE=1 SV=4	3425	134761	201	149	69	59	997	1	1	1	435.19	868.37	2	868.37	0	0	9.54	0.37	R	TDHEDPR	V			2_F80CXA20_2.1235.1235.2
5	O75339	Cartilage intermediate layer protein 1 OS=Homo sapiens GN=CILP PE=1 SV=4	3425	134761	201	149	69	59	1014	1	1	1	436.25	870.48	2	870.49	0	0	9.01	2.3	R	VCARPLR	L			F80TXB20.2049.2049.2
5	O75339	Cartilage intermediate layer protein 1 OS=Homo sapiens GN=CILP PE=1 SV=4	3425	134761	201	149	69	59	1015	2	1	1	436.25	870.48	2	870.49	0	0	0.63	16	R	VCARPLR	L			f69txb20.1777.1777.2
5	O75339	Cartilage intermediate layer protein 1 OS=Homo sapiens GN=CILP PE=1 SV=4	3425	134761	201	149	69	59	1017	9	1	1	436.25	870.49	2	870.49	0.01	0	4.26	5.3	R	VCARPLR	L			F80TXA20.3113.3113.2
5	O75339	Cartilage intermediate layer protein 1 OS=Homo sapiens GN=CILP PE=1 SV=4	3425	134761	201	149	69	59	1096	1	1	1	441.25	880.48	2	880.48	0	1	26.5	0.035	R	ACYIKVK	I			2_F80CXA20_1.2875.2875.2
5	O75339	Cartilage intermediate layer protein 1 OS=Homo sapiens GN=CILP PE=1 SV=4	3425	134761	201	149	69	59	1097	1	1	1	441.25	880.48	2	880.48	0	1	28.66	0.021	R	ACYIKVK	I			F80CXA20_2.2827.2827.2
5	O75339	Cartilage intermediate layer protein 1 OS=Homo sapiens GN=CILP PE=1 SV=4	3425	134761	201	149	69	59	1104	1	1	1	441.76	881.5	2	881.5	0	0	35.96	0.0014	R	VAQQPLIN	-			F80TXA20.4020.4020.2
5	O75339	Cartilage intermediate layer protein 1 OS=Homo sapiens GN=CILP PE=1 SV=4	3425	134761	201	149	69	59	1105	1	1	1	441.76	881.5	2	881.5	0	0	35.81	0.0015	R	VAQQPLIN	-			f69cxa20.3491.3491.2
5	O75339	Cartilage intermediate layer protein 1 OS=Homo sapiens GN=CILP PE=1 SV=4	3425	134761	201	149	69	59	1115	1	1	1	443.76	885.5	2	885.5	0	0	47.99	0.00031	R	QGGVVASLR	F			2_F80TXB20.3611.3611.2
5	O75339	Cartilage intermediate layer protein 1 OS=Homo sapiens GN=CILP PE=1 SV=4	3425	134761	201	149	69	59	1116	1	1	1	443.76	885.5	2	885.5	0	0	44.37	0.0007	R	QGGVVASLR	F			F80TXB20.3659.3659.2
5	O75339	Cartilage intermediate layer protein 1 OS=Homo sapiens GN=CILP PE=1 SV=4	3425	134761	201	149	69	59	1132	1	1	1	446.24	890.46	2	890.46	0	0	44.07	0.00093	R	TGFLSNPR	A			F80CXA20_1.4040.4040.2
5	O75339	Cartilage intermediate layer protein 1 OS=Homo sapiens GN=CILP PE=1 SV=4	3425	134761	201	149	69	59	1133	1	1	1	446.24	890.46	2	890.46	0	0	53.05	0.00012	R	TGFLSNPR	A			F80CXA20_2.3978.3978.2
5	O75339	Cartilage intermediate layer protein 1 OS=Homo sapiens GN=CILP PE=1 SV=4	3425	134761	201	149	69	59	1315	2	1	1	458.74	915.46	2	915.46	0	0	3.4	9.6	K	VIPQGSCR	R			f69cxa20.1704.1704.2
5	O75339	Cartilage intermediate layer protein 1 OS=Homo sapiens GN=CILP PE=1 SV=4	3425	134761	201	149	69	59	1316	1	1	1	458.74	915.46	2	915.46	0	0	22.09	0.13	K	VIPQGSCR	R			2_F80CXA20_2.2025.2025.2
5	O75339	Cartilage intermediate layer protein 1 OS=Homo sapiens GN=CILP PE=1 SV=4	3425	134761	201	149	69	59	1600	1	1	1	478.75	955.48	2	955.48	0	0	19.83	0.13	R	IPGLCPDGK	S			2_F80TXB20.3977.3977.2
5	O75339	Cartilage intermediate layer protein 1 OS=Homo sapiens GN=CILP PE=1 SV=4	3425	134761	201	149	69	59	1601	1	1	1	478.75	955.48	2	955.48	0	0	18.3	0.18	R	IPGLCPDGK	S			f69txa20.3630.3630.2
5	O75339	Cartilage intermediate layer protein 1 OS=Homo sapiens GN=CILP PE=1 SV=4	3425	134761	201	149	69	59	1613	1	1	1	479.79	957.56	2	957.56	0	1	26.76	0.039	R	TAKEIALGR	C			F80TXB20.2850.2850.2
5	O75339	Cartilage intermediate layer protein 1 OS=Homo sapiens GN=CILP PE=1 SV=4	3425	134761	201	149	69	59	1614	1	1	1	479.79	957.56	2	957.56	0	1	20.55	0.16	R	TAKEIALGR	C			2_F80TXB20.2793.2793.2
5	O75339	Cartilage intermediate layer protein 1 OS=Homo sapiens GN=CILP PE=1 SV=4	3425	134761	201	149	69	59	1880	1	1	1	494.27	986.52	2	986.52	0	0	32.81	0.0097	K	GSAVFHEIK	M			2_F80CXA20_2.3491.3491.2
5	O75339	Cartilage intermediate layer protein 1 OS=Homo sapiens GN=CILP PE=1 SV=4	3425	134761	201	149	69	59	1881	1	1	1	494.27	986.52	2	986.52	0	0	55.34	5.4e-05	K	GSAVFHEIK	M			F80TXB20.3469.3469.2
5	O75339	Cartilage intermediate layer protein 1 OS=Homo sapiens GN=CILP PE=1 SV=4	3425	134761	201	149	69	59	2044	1	1	1	503.25	1004.49	2	1004.49	0	0	32.25	0.011	R	QNGEPYIGK	V			2_F80CXA20_2.2979.2979.2
5	O75339	Cartilage intermediate layer protein 1 OS=Homo sapiens GN=CILP PE=1 SV=4	3425	134761	201	149	69	59	2045	1	1	1	503.25	1004.49	2	1004.49	0	0	21.22	0.14	R	QNGEPYIGK	V			2_F80CXA20_1.2971.2971.2
5	O75339	Cartilage intermediate layer protein 1 OS=Homo sapiens GN=CILP PE=1 SV=4	3425	134761	201	149	69	59	2048	1	1	1	503.27	1004.53	2	1004.53	0	0	59.44	2.3e-05	K	ASVTFLDPR	N			f69cxb20_100930171645.4840.4840.2
5	O75339	Cartilage intermediate layer protein 1 OS=Homo sapiens GN=CILP PE=1 SV=4	3425	134761	201	149	69	59	2049	1	1	1	503.27	1004.53	2	1004.53	0	0	70.46	1.8e-06	K	ASVTFLDPR	N			f69cxa20.4756.4756.2
5	O75339	Cartilage intermediate layer protein 1 OS=Homo sapiens GN=CILP PE=1 SV=4	3425	134761	201	149	69	59	2209	1	1	1	513.24	1024.47	2	1024.47	0	1	19.65	0.11	R	RTDHEDPR	V			F80CXA20_2.1119.1119.2
5	O75339	Cartilage intermediate layer protein 1 OS=Homo sapiens GN=CILP PE=1 SV=4	3425	134761	201	149	69	59	2210	1	1	1	513.24	1024.47	2	1024.47	0	1	10.66	0.84	R	RTDHEDPR	V			2_F80CXA20_2.1198.1198.2
5	O75339	Cartilage intermediate layer protein 1 OS=Homo sapiens GN=CILP PE=1 SV=4	3425	134761	201	149	69	59	2221	1	1	1	513.78	1025.55	2	1025.55	0	0	4.78	3.3	K	VHLDSTQVK	M			f69cxb20_100930171645.2516.2516.2
5	O75339	Cartilage intermediate layer protein 1 OS=Homo sapiens GN=CILP PE=1 SV=4	3425	134761	201	149	69	59	2222	1	1	1	513.78	1025.55	2	1025.55	0	0	41.68	0.00055	K	VHLDSTQVK	M			F80TXA20.2485.2485.2
5	O75339	Cartilage intermediate layer protein 1 OS=Homo sapiens GN=CILP PE=1 SV=4	3425	134761	201	149	69	59	2223	1	1	1	513.78	1025.55	2	1025.55	0	0	34.9	0.0026	K	VHLDSTQVK	M			2_F80CXA20_1.2534.2534.2
5	O75339	Cartilage intermediate layer protein 1 OS=Homo sapiens GN=CILP PE=1 SV=4	3425	134761	201	149	69	59	2230	1	1	1	514.25	1026.48	2	1026.48	0	0	51.75	6.3e-05	R	FYQIEGDR	Y			F80TXA20.3988.3988.2
5	O75339	Cartilage intermediate layer protein 1 OS=Homo sapiens GN=CILP PE=1 SV=4	3425	134761	201	149	69	59	2231	1	1	1	514.25	1026.48	2	1026.48	0	0	39.79	0.001	R	FYQIEGDR	Y			f69cxa20.3451.3451.2
5	O75339	Cartilage intermediate layer protein 1 OS=Homo sapiens GN=CILP PE=1 SV=4	3425	134761	201	149	69	59	2336	1	1	1	521.27	1040.53	2	1040.53	0	0	38.85	0.002	K	MPEHISTVK	L			f69cxa20.2276.2276.2
5	O75339	Cartilage intermediate layer protein 1 OS=Homo sapiens GN=CILP PE=1 SV=4	3425	134761	201	149	69	59	2337	1	1	1	521.27	1040.53	2	1040.53	0	0	40.68	0.0013	K	MPEHISTVK	L			m84txa20.2414.2414.2
5	O75339	Cartilage intermediate layer protein 1 OS=Homo sapiens GN=CILP PE=1 SV=4	3425	134761	201	149	69	59	2386	1	1	1	523.78	1045.54	2	1045.54	0	0	11.36	1.8	R	FLCPPGSLR	R			2_F80CXA20_2.4959.4959.2
5	O75339	Cartilage intermediate layer protein 1 OS=Homo sapiens GN=CILP PE=1 SV=4	3425	134761	201	149	69	59	2387	2	1	1	523.78	1045.54	2	1045.54	0	0	7.33	4.6	R	FLCPPGSLR	R			2_F80CXA20_1.4951.4951.2
5	O75339	Cartilage intermediate layer protein 1 OS=Homo sapiens GN=CILP PE=1 SV=4	3425	134761	201	149	69	59	2493	1	1	1	529.27	1056.53	2	1056.53	0	0	31.62	0.011	K	MPEHISTVK	L	Oxidation (M)	0.100000000.0	2_F80TXB20.2047.2047.2
5	O75339	Cartilage intermediate layer protein 1 OS=Homo sapiens GN=CILP PE=1 SV=4	3425	134761	201	149	69	59	2494	1	1	1	529.27	1056.53	2	1056.53	0	0	15.88	0.4	K	MPEHISTVK	L	Oxidation (M)	0.100000000.0	m84cxa20.2029.2029.2
5	O75339	Cartilage intermediate layer protein 1 OS=Homo sapiens GN=CILP PE=1 SV=4	3425	134761	201	149	69	59	2683	1	1	1	541.25	1080.48	2	1080.48	0	0	45.41	0.00021	R	EGFWCLNR	E			2_F80CXA20_1.6205.6205.2
5	O75339	Cartilage intermediate layer protein 1 OS=Homo sapiens GN=CILP PE=1 SV=4	3425	134761	201	149	69	59	2684	1	1	1	541.25	1080.48	2	1080.48	0	0	40.96	0.0006	R	EGFWCLNR	E			2_F80TXA20.6249.6249.2
5	O75339	Cartilage intermediate layer protein 1 OS=Homo sapiens GN=CILP PE=1 SV=4	3425	134761	201	149	69	59	2812	1	1	1	548.33	1094.65	2	1094.64	0	0	22.94	0.02	K	IVGPLEVNVR	S			m84txb20.8095.8095.2
5	O75339	Cartilage intermediate layer protein 1 OS=Homo sapiens GN=CILP PE=1 SV=4	3425	134761	201	149	69	59	2813	1	1	1	548.33	1094.65	2	1094.64	0	0	7.9	0.64	K	IVGPLEVNVR	S			f69cxa20_100930142853.8102.8102.2
5	O75339	Cartilage intermediate layer protein 1 OS=Homo sapiens GN=CILP PE=1 SV=4	3425	134761	201	149	69	59	2814	1	1	1	548.33	1094.65	2	1094.64	0	0	28.29	0.0059	K	IVGPLEVNVR	S			f69txa20.8429.8429.2
5	O75339	Cartilage intermediate layer protein 1 OS=Homo sapiens GN=CILP PE=1 SV=4	3425	134761	201	149	69	59	2816	1	1	1	548.33	1094.65	2	1094.64	0	0	8.69	0.53	K	IVGPLEVNVR	S			m84txb20.6958.6958.2
5	O75339	Cartilage intermediate layer protein 1 OS=Homo sapiens GN=CILP PE=1 SV=4	3425	134761	201	149	69	59	2817	1	1	1	548.33	1094.65	2	1094.64	0	0	22.33	0.023	K	IVGPLEVNVR	S			f69cxb20.7081.7081.2
5	O75339	Cartilage intermediate layer protein 1 OS=Homo sapiens GN=CILP PE=1 SV=4	3425	134761	201	149	69	59	2818	1	1	1	548.33	1094.65	2	1094.64	0	0	64.15	1.4e-06	K	IVGPLEVNVR	S			m84cxb20.4780.4780.2
5	O75339	Cartilage intermediate layer protein 1 OS=Homo sapiens GN=CILP PE=1 SV=4	3425	134761	201	149	69	59	2819	1	1	1	548.33	1094.65	2	1094.64	0	0	46.59	8.1e-05	K	IVGPLEVNVR	S			m84cxa20.5272.5272.2
5	O75339	Cartilage intermediate layer protein 1 OS=Homo sapiens GN=CILP PE=1 SV=4	3425	134761	201	149	69	59	2911	1	1	1	553.28	1104.54	2	1104.54	0	0	48.98	0.0002	K	LLTQTDSDGR	F			m84txb20.2327.2327.2
5	O75339	Cartilage intermediate layer protein 1 OS=Homo sapiens GN=CILP PE=1 SV=4	3425	134761	201	149	69	59	3017	1	1	1	558.83	1115.64	2	1115.64	0	0	56.74	2.1e-05	K	FAPIVLTMPK	T			f69cxa20.6293.6293.2
5	O75339	Cartilage intermediate layer protein 1 OS=Homo sapiens GN=CILP PE=1 SV=4	3425	134761	201	149	69	59	3018	1	1	1	558.83	1115.64	2	1115.64	0	0	50.5	8.9e-05	K	FAPIVLTMPK	T			2_F80CXA20_2.6968.6968.2
5	O75339	Cartilage intermediate layer protein 1 OS=Homo sapiens GN=CILP PE=1 SV=4	3425	134761	201	149	69	59	3291	1	1	1	573.76	1145.52	2	1145.51	0	0	45.5	0.00018	R	VSAADNGEPMR	F			F80CXA20_2.2357.2357.2
5	O75339	Cartilage intermediate layer protein 1 OS=Homo sapiens GN=CILP PE=1 SV=4	3425	134761	201	149	69	59	3292	1	1	1	573.76	1145.52	2	1145.51	0	0	34.31	0.0023	R	VSAADNGEPMR	F			2_F80CXA20_1.2403.2403.2
5	O75339	Cartilage intermediate layer protein 1 OS=Homo sapiens GN=CILP PE=1 SV=4	3425	134761	201	149	69	59	3415	1	1	1	581.34	1160.66	2	1160.66	0	0	49.36	0.00011	R	TFLVGNLEIR	E			m84txa20.6247.6247.2
5	O75339	Cartilage intermediate layer protein 1 OS=Homo sapiens GN=CILP PE=1 SV=4	3425	134761	201	149	69	59	3416	1	1	1	581.34	1160.66	2	1160.66	0	0	55.75	2.6e-05	R	TFLVGNLEIR	E			2_F80CXA20_2.6890.6890.2
5	O75339	Cartilage intermediate layer protein 1 OS=Homo sapiens GN=CILP PE=1 SV=4	3425	134761	201	149	69	59	3668	1	1	1	594.73	1187.45	2	1187.45	0	0	42.22	6e-05	R	CFDGTSDGSSR	I			2_F80TXA20.2226.2226.2
5	O75339	Cartilage intermediate layer protein 1 OS=Homo sapiens GN=CILP PE=1 SV=4	3425	134761	201	149	69	59	3669	1	1	1	594.73	1187.45	2	1187.45	0	0	50.67	8.6e-06	R	CFDGTSDGSSR	I			F80CXA20_1.2205.2205.2
5	O75339	Cartilage intermediate layer protein 1 OS=Homo sapiens GN=CILP PE=1 SV=4	3425	134761	201	149	69	59	3686	1	1	1	595.32	1188.62	2	1188.61	0	0	31.57	0.012	R	LFNLDVPESR	R			f69txa20.5737.5737.2
5	O75339	Cartilage intermediate layer protein 1 OS=Homo sapiens GN=CILP PE=1 SV=4	3425	134761	201	149	69	59	3687	1	1	1	595.32	1188.62	2	1188.61	0	0	33.95	0.007	R	LFNLDVPESR	R			m84txb20.5460.5460.2
5	O75339	Cartilage intermediate layer protein 1 OS=Homo sapiens GN=CILP PE=1 SV=4	3425	134761	201	149	69	59	4089	1	1	1	611.78	1221.55	2	1221.55	0	0	31.67	0.0059	R	TYGMFSVDFR	D			m84cxb20.6024.6024.2
5	O75339	Cartilage intermediate layer protein 1 OS=Homo sapiens GN=CILP PE=1 SV=4	3425	134761	201	149	69	59	4090	1	1	1	611.78	1221.55	2	1221.55	0	0	1.93	5.6	R	TYGMFSVDFR	D			m84txa20.6230.6230.2
5	O75339	Cartilage intermediate layer protein 1 OS=Homo sapiens GN=CILP PE=1 SV=4	3425	134761	201	149	69	59	4204	1	1	1	616.83	1231.65	2	1231.66	0	1	29.95	0.017	R	QNGEPYIGKVK	A			F80CXA20_2.3087.3087.2
5	O75339	Cartilage intermediate layer protein 1 OS=Homo sapiens GN=CILP PE=1 SV=4	3425	134761	201	149	69	59	4205	1	1	1	616.83	1231.65	2	1231.66	0	1	29.21	0.02	R	QNGEPYIGKVK	A			2_F80CXA20_1.3119.3119.2
5	O75339	Cartilage intermediate layer protein 1 OS=Homo sapiens GN=CILP PE=1 SV=4	3425	134761	201	149	69	59	4206	1	1	1	411.56	1231.65	3	1231.66	0	1	20.52	0.15	R	QNGEPYIGKVK	A			2_F80CXA20_2.3128.3128.3
5	O75339	Cartilage intermediate layer protein 1 OS=Homo sapiens GN=CILP PE=1 SV=4	3425	134761	201	149	69	59	4207	1	1	1	411.56	1231.65	3	1231.66	0	1	18.38	0.24	R	QNGEPYIGKVK	A			F80CXA20_1.3130.3130.3
5	O75339	Cartilage intermediate layer protein 1 OS=Homo sapiens GN=CILP PE=1 SV=4	3425	134761	201	149	69	59	4424	1	1	1	626.28	1250.54	2	1250.54	0	0	41.73	0.00045	R	DAVQNCCGISK	T			F80CXA20_2.2386.2386.2
5	O75339	Cartilage intermediate layer protein 1 OS=Homo sapiens GN=CILP PE=1 SV=4	3425	134761	201	149	69	59	4425	1	1	1	626.28	1250.54	2	1250.54	0	0	54.51	2.4e-05	R	DAVQNCCGISK	T			F80CXA20_1.2437.2437.2
5	O75339	Cartilage intermediate layer protein 1 OS=Homo sapiens GN=CILP PE=1 SV=4	3425	134761	201	149	69	59	4446	1	1	1	627.36	1252.7	2	1252.71	-0.01	1	2.44	4.1	K	VKVHLDSTQVK	M			f69txa20.8064.8064.2
5	O75339	Cartilage intermediate layer protein 1 OS=Homo sapiens GN=CILP PE=1 SV=4	3425	134761	201	149	69	59	4448	1	1	1	418.58	1252.71	3	1252.71	0	1	36.22	0.0018	K	VKVHLDSTQVK	M			m84txa20.2475.2475.3
5	O75339	Cartilage intermediate layer protein 1 OS=Homo sapiens GN=CILP PE=1 SV=4	3425	134761	201	149	69	59	4449	1	1	1	418.58	1252.71	3	1252.71	0	1	40.29	0.00069	K	VKVHLDSTQVK	M			F80CXA20_1.2849.2849.3
5	O75339	Cartilage intermediate layer protein 1 OS=Homo sapiens GN=CILP PE=1 SV=4	3425	134761	201	149	69	59	4500	1	1	1	630.31	1258.6	2	1258.6	0	0	39.21	0.0013	R	DEVTSEPLNAGK	V			2_F80CXA20_2.3347.3347.2
5	O75339	Cartilage intermediate layer protein 1 OS=Homo sapiens GN=CILP PE=1 SV=4	3425	134761	201	149	69	59	4501	1	1	1	630.31	1258.6	2	1258.6	0	0	38.97	0.0013	R	DEVTSEPLNAGK	V			F80CXA20_1.3361.3361.2
5	O75339	Cartilage intermediate layer protein 1 OS=Homo sapiens GN=CILP PE=1 SV=4	3425	134761	201	149	69	59	4502	1	1	1	420.56	1258.65	3	1258.65	0	1	14.84	0.57	R	FRIPGLCPDGK	S			2_F80TXB20.5645.5645.3
5	O75339	Cartilage intermediate layer protein 1 OS=Homo sapiens GN=CILP PE=1 SV=4	3425	134761	201	149	69	59	4503	1	1	1	420.56	1258.65	3	1258.65	0	1	10.24	1.7	R	FRIPGLCPDGK	S			f69txb20.4992.4992.3
5	O75339	Cartilage intermediate layer protein 1 OS=Homo sapiens GN=CILP PE=1 SV=4	3425	134761	201	149	69	59	4816	1	1	1	429.58	1285.73	3	1285.73	0	1	26.47	0.027	R	QGGVVASLRFPR	V			F80CXA20_2.5324.5324.3
5	O75339	Cartilage intermediate layer protein 1 OS=Homo sapiens GN=CILP PE=1 SV=4	3425	134761	201	149	69	59	4817	1	1	1	429.58	1285.73	3	1285.73	0	1	26.69	0.025	R	QGGVVASLRFPR	V			F80CXA20_1.5373.5373.3
5	O75339	Cartilage intermediate layer protein 1 OS=Homo sapiens GN=CILP PE=1 SV=4	3425	134761	201	149	69	59	4818	1	1	1	643.87	1285.73	2	1285.73	0	1	33.81	0.0051	R	QGGVVASLRFPR	V			2_F80TXB20.5294.5294.2
5	O75339	Cartilage intermediate layer protein 1 OS=Homo sapiens GN=CILP PE=1 SV=4	3425	134761	201	149	69	59	4819	1	1	1	643.87	1285.73	2	1285.73	0	1	31.52	0.0087	R	QGGVVASLRFPR	V			2_F80TXA20.5420.5420.2
5	O75339	Cartilage intermediate layer protein 1 OS=Homo sapiens GN=CILP PE=1 SV=4	3425	134761	201	149	69	59	5264	1	1	1	661.91	1321.81	2	1321.81	0	1	29.92	0.0018	K	VKIVGPLEVNVR	S			2_F80TXB20.5547.5547.2
5	O75339	Cartilage intermediate layer protein 1 OS=Homo sapiens GN=CILP PE=1 SV=4	3425	134761	201	149	69	59	5265	1	1	1	661.91	1321.81	2	1321.81	0	1	20.53	0.016	K	VKIVGPLEVNVR	S			F80TXB20.5617.5617.2
5	O75339	Cartilage intermediate layer protein 1 OS=Homo sapiens GN=CILP PE=1 SV=4	3425	134761	201	149	69	59	5266	1	1	1	441.61	1321.81	3	1321.81	0	1	54.17	6.9e-06	K	VKIVGPLEVNVR	S			F80CXA20_1.5623.5623.3
5	O75339	Cartilage intermediate layer protein 1 OS=Homo sapiens GN=CILP PE=1 SV=4	3425	134761	201	149	69	59	5267	1	1	1	441.61	1321.81	3	1321.81	0	1	42.89	9.3e-05	K	VKIVGPLEVNVR	S			2_F80TXA20.5656.5656.3
5	O75339	Cartilage intermediate layer protein 1 OS=Homo sapiens GN=CILP PE=1 SV=4	3425	134761	201	149	69	59	5529	1	1	1	448.61	1342.8	3	1342.8	0	1	31.92	0.0015	K	VKFAPIVLTMPK	T			2_F80CXA20_1.6719.6719.3
5	O75339	Cartilage intermediate layer protein 1 OS=Homo sapiens GN=CILP PE=1 SV=4	3425	134761	201	149	69	59	5530	1	1	1	448.61	1342.8	3	1342.8	0	1	37.83	0.0004	K	VKFAPIVLTMPK	T			F80CXA20_2.6679.6679.3
5	O75339	Cartilage intermediate layer protein 1 OS=Homo sapiens GN=CILP PE=1 SV=4	3425	134761	201	149	69	59	5558	1	1	1	449.25	1344.72	3	1344.71	0	1	26.96	0.035	R	LFNLDVPESRR	C			F80CXA20_1.5733.5733.3
5	O75339	Cartilage intermediate layer protein 1 OS=Homo sapiens GN=CILP PE=1 SV=4	3425	134761	201	149	69	59	5559	1	1	1	449.25	1344.72	3	1344.71	0	1	22.9	0.088	R	LFNLDVPESRR	C			m84txb20.5017.5017.3
5	O75339	Cartilage intermediate layer protein 1 OS=Homo sapiens GN=CILP PE=1 SV=4	3425	134761	201	149	69	59	5560	1	1	1	449.25	1344.72	3	1344.71	0	1	20.79	0.15	R	LFNLDVPESRR	C			f69txa20.5116.5116.3
5	O75339	Cartilage intermediate layer protein 1 OS=Homo sapiens GN=CILP PE=1 SV=4	3425	134761	201	149	69	59	5561	1	1	1	449.25	1344.72	3	1344.71	0	1	35.22	0.0053	R	LFNLDVPESRR	C			m84cxa20.5266.5266.3
5	O75339	Cartilage intermediate layer protein 1 OS=Homo sapiens GN=CILP PE=1 SV=4	3425	134761	201	149	69	59	5735	1	1	1	679.38	1356.75	2	1356.75	0	1	38.1	0.0015	R	TLVKVIPQGSCR	R			F80TXB20.3852.3852.2
5	O75339	Cartilage intermediate layer protein 1 OS=Homo sapiens GN=CILP PE=1 SV=4	3425	134761	201	149	69	59	5736	1	1	1	679.38	1356.75	2	1356.75	0	1	35.12	0.003	R	TLVKVIPQGSCR	R			2_F80TXB20.3798.3798.2
5	O75339	Cartilage intermediate layer protein 1 OS=Homo sapiens GN=CILP PE=1 SV=4	3425	134761	201	149	69	59	5737	1	1	1	453.26	1356.76	3	1356.75	0	1	28.83	0.013	R	TLVKVIPQGSCR	R			F80CXA20_1.3872.3872.3
5	O75339	Cartilage intermediate layer protein 1 OS=Homo sapiens GN=CILP PE=1 SV=4	3425	134761	201	149	69	59	5738	1	1	1	453.26	1356.76	3	1356.75	0	1	19.49	0.11	R	TLVKVIPQGSCR	R			F80TXA20.3812.3812.3
5	O75339	Cartilage intermediate layer protein 1 OS=Homo sapiens GN=CILP PE=1 SV=4	3425	134761	201	149	69	59	6198	1	1	1	698.31	1394.6	2	1394.6	0	0	76.58	1.2e-07	K	CSAACGQTGVQTR	T			f69cxa20_100930142853.1726.1726.2
5	O75339	Cartilage intermediate layer protein 1 OS=Homo sapiens GN=CILP PE=1 SV=4	3425	134761	201	149	69	59	6199	1	1	1	698.31	1394.6	2	1394.6	0	0	78.86	7.3e-08	K	CSAACGQTGVQTR	T			m84txa20.1759.1759.2
5	O75339	Cartilage intermediate layer protein 1 OS=Homo sapiens GN=CILP PE=1 SV=4	3425	134761	201	149	69	59	6211	1	1	1	698.84	1395.67	2	1395.67	0	0	61.83	9.3e-06	R	EIQCSGYTLPTK	V			2_F80CXA20_1.4233.4233.2
5	O75339	Cartilage intermediate layer protein 1 OS=Homo sapiens GN=CILP PE=1 SV=4	3425	134761	201	149	69	59	6212	1	1	1	698.84	1395.67	2	1395.67	0	0	58.79	1.9e-05	R	EIQCSGYTLPTK	V			m84cxa20.4004.4004.2
5	O75339	Cartilage intermediate layer protein 1 OS=Homo sapiens GN=CILP PE=1 SV=4	3425	134761	201	149	69	59	6685	1	1	1	481.55	1441.64	3	1441.64	0	0	23.64	0.028	R	ACEEAPPSAAHFR	F			f69txb20.2646.2646.3
5	O75339	Cartilage intermediate layer protein 1 OS=Homo sapiens GN=CILP PE=1 SV=4	3425	134761	201	149	69	59	6686	1	1	1	481.55	1441.64	3	1441.64	0	0	28.88	0.0084	R	ACEEAPPSAAHFR	F			f69cxb20_100930171645.2808.2808.3
5	O75339	Cartilage intermediate layer protein 1 OS=Homo sapiens GN=CILP PE=1 SV=4	3425	134761	201	149	69	59	7037	1	1	1	739.85	1477.69	2	1477.69	0	0	9.73	1.5	R	DQPNVSAACLEFK	C			F80TXA20.5381.5381.2
5	O75339	Cartilage intermediate layer protein 1 OS=Homo sapiens GN=CILP PE=1 SV=4	3425	134761	201	149	69	59	7038	1	1	1	739.85	1477.69	2	1477.69	0	0	69.6	1.6e-06	R	DQPNVSAACLEFK	C			2_F80TXA20.5471.5471.2
5	O75339	Cartilage intermediate layer protein 1 OS=Homo sapiens GN=CILP PE=1 SV=4	3425	134761	201	149	69	59	7157	1	1	1	496.26	1485.77	3	1485.77	0	1	37.83	0.0025	R	DEVTSEPLNAGKVK	V			F80CXA20_1.3415.3415.3
5	O75339	Cartilage intermediate layer protein 1 OS=Homo sapiens GN=CILP PE=1 SV=4	3425	134761	201	149	69	59	7159	1	1	1	743.89	1485.77	2	1485.77	0	1	65	4.9e-06	R	DEVTSEPLNAGKVK	V			2_F80CXA20_1.3405.3405.2
5	O75339	Cartilage intermediate layer protein 1 OS=Homo sapiens GN=CILP PE=1 SV=4	3425	134761	201	149	69	59	7160	1	1	1	743.89	1485.77	2	1485.77	0	1	55.21	4.7e-05	R	DEVTSEPLNAGKVK	V			2_F80CXA20_2.3396.3396.2
5	O75339	Cartilage intermediate layer protein 1 OS=Homo sapiens GN=CILP PE=1 SV=4	3425	134761	201	149	69	59	7411	1	1	1	503.57	1507.69	3	1507.69	0	0	22.82	0.049	K	LQQHQAGEYFCK	A			m84cxb20.2691.2691.3
5	O75339	Cartilage intermediate layer protein 1 OS=Homo sapiens GN=CILP PE=1 SV=4	3425	134761	201	149	69	59	7412	1	1	1	503.57	1507.69	3	1507.69	0	0	32.58	0.0052	K	LQQHQAGEYFCK	A			f69cxb20_100930171645.2821.2821.3
5	O75339	Cartilage intermediate layer protein 1 OS=Homo sapiens GN=CILP PE=1 SV=4	3425	134761	201	149	69	59	7413	1	1	1	754.85	1507.69	2	1507.69	0	0	42.42	0.00054	K	LQQHQAGEYFCK	A			f69cxb20.2860.2860.2
5	O75339	Cartilage intermediate layer protein 1 OS=Homo sapiens GN=CILP PE=1 SV=4	3425	134761	201	149	69	59	7414	1	1	1	754.85	1507.69	2	1507.69	0	0	55.34	2.8e-05	K	LQQHQAGEYFCK	A			m84cxa20.3043.3043.2
5	O75339	Cartilage intermediate layer protein 1 OS=Homo sapiens GN=CILP PE=1 SV=4	3425	134761	201	149	69	59	7444	1	1	1	755.85	1509.69	2	1509.68	0	0	60.35	6.7e-06	R	AETPYMVMNPETK	A			F80CXA20_1.5137.5137.2
5	O75339	Cartilage intermediate layer protein 1 OS=Homo sapiens GN=CILP PE=1 SV=4	3425	134761	201	149	69	59	7445	1	1	1	755.85	1509.69	2	1509.68	0	0	59.66	7.9e-06	R	AETPYMVMNPETK	A			m84txa20.4518.4518.2
5	O75339	Cartilage intermediate layer protein 1 OS=Homo sapiens GN=CILP PE=1 SV=4	3425	134761	201	149	69	59	7972	1	1	1	520.9	1559.67	3	1559.67	0	1	13.4	0.24	R	CFDGTSDGSSRIMK	S			F80CXA20_1.3381.3381.3
5	O75339	Cartilage intermediate layer protein 1 OS=Homo sapiens GN=CILP PE=1 SV=4	3425	134761	201	149	69	59	7973	1	1	1	520.9	1559.67	3	1559.67	0	1	7.22	1	R	CFDGTSDGSSRIMK	S			2_F80CXA20_2.3355.3355.3
5	O75339	Cartilage intermediate layer protein 1 OS=Homo sapiens GN=CILP PE=1 SV=4	3425	134761	201	149	69	59	7982	1	1	1	781.42	1560.82	2	1560.83	-0.01	1	27.32	0.026	R	EDRTFLVGNLEIR	E			2_F80TXA20.6422.6422.2
5	O75339	Cartilage intermediate layer protein 1 OS=Homo sapiens GN=CILP PE=1 SV=4	3425	134761	201	149	69	59	7983	1	1	1	781.42	1560.82	2	1560.83	-0.01	1	28.8	0.018	R	EDRTFLVGNLEIR	E			F80CXA20_1.6375.6375.2
5	O75339	Cartilage intermediate layer protein 1 OS=Homo sapiens GN=CILP PE=1 SV=4	3425	134761	201	149	69	59	7984	1	1	1	521.28	1560.83	3	1560.83	0	1	50	0.00015	R	EDRTFLVGNLEIR	E			f69txa20.5925.5925.3
5	O75339	Cartilage intermediate layer protein 1 OS=Homo sapiens GN=CILP PE=1 SV=4	3425	134761	201	149	69	59	7985	1	1	1	521.28	1560.83	3	1560.83	0	1	44.5	0.00052	R	EDRTFLVGNLEIR	E			F80CXA20_1.6365.6365.3
5	O75339	Cartilage intermediate layer protein 1 OS=Homo sapiens GN=CILP PE=1 SV=4	3425	134761	201	149	69	59	8032	1	1	1	783.39	1564.76	2	1564.77	0	0	51.09	0.00012	K	SNVGVALTFNCVER	Q			f69txb20.6845.6845.2
5	O75339	Cartilage intermediate layer protein 1 OS=Homo sapiens GN=CILP PE=1 SV=4	3425	134761	201	149	69	59	8033	1	1	1	783.39	1564.76	2	1564.77	0	0	70.38	1.4e-06	K	SNVGVALTFNCVER	Q			f69cxb20_100930171645.7209.7209.2
5	O75339	Cartilage intermediate layer protein 1 OS=Homo sapiens GN=CILP PE=1 SV=4	3425	134761	201	149	69	59	8034	1	1	1	522.6	1564.77	3	1564.77	0	0	53.23	7.1e-05	K	SNVGVALTFNCVER	Q			2_F80CXA20_2.5919.5919.3
5	O75339	Cartilage intermediate layer protein 1 OS=Homo sapiens GN=CILP PE=1 SV=4	3425	134761	201	149	69	59	8035	1	1	1	522.6	1564.77	3	1564.77	0	0	48.7	0.0002	K	SNVGVALTFNCVER	Q			F80TXB20.5894.5894.3
5	O75339	Cartilage intermediate layer protein 1 OS=Homo sapiens GN=CILP PE=1 SV=4	3425	134761	201	149	69	59	8036	1	1	1	783.39	1564.77	2	1564.77	0	0	71.68	1e-06	K	SNVGVALTFNCVER	Q			2_F80TXA20.5958.5958.2
5	O75339	Cartilage intermediate layer protein 1 OS=Homo sapiens GN=CILP PE=1 SV=4	3425	134761	201	149	69	59	8037	1	1	1	783.39	1564.77	2	1564.77	0	0	67.59	2.6e-06	K	SNVGVALTFNCVER	Q			m84txb20.5225.5225.2
5	O75339	Cartilage intermediate layer protein 1 OS=Homo sapiens GN=CILP PE=1 SV=4	3425	134761	201	149	69	59	8479	1	1	1	807.85	1613.69	2	1613.69	0	1	28.34	0.0051	K	CSGMLYDQDRVDR	T			F80CXA20_1.3680.3680.2
5	O75339	Cartilage intermediate layer protein 1 OS=Homo sapiens GN=CILP PE=1 SV=4	3425	134761	201	149	69	59	8480	1	1	1	807.85	1613.69	2	1613.69	0	1	22.63	0.019	K	CSGMLYDQDRVDR	T			f69cxa20_100930142853.3169.3169.2
5	O75339	Cartilage intermediate layer protein 1 OS=Homo sapiens GN=CILP PE=1 SV=4	3425	134761	201	149	69	59	8481	1	1	1	538.91	1613.69	3	1613.69	0	1	37.32	0.00062	K	CSGMLYDQDRVDR	T			f69txa20.3264.3264.3
5	O75339	Cartilage intermediate layer protein 1 OS=Homo sapiens GN=CILP PE=1 SV=4	3425	134761	201	149	69	59	8482	1	1	1	538.91	1613.69	3	1613.69	0	1	36.12	0.00082	K	CSGMLYDQDRVDR	T			2_F80CXA20_1.3659.3659.3
5	O75339	Cartilage intermediate layer protein 1 OS=Homo sapiens GN=CILP PE=1 SV=4	3425	134761	201	149	69	59	8666	1	1	1	544.24	1629.69	3	1629.69	0	1	38.68	0.00034	K	CSGMLYDQDRVDR	T	Oxidation (M)	0.0001000000000.0	f69cxb20.2649.2649.3
5	O75339	Cartilage intermediate layer protein 1 OS=Homo sapiens GN=CILP PE=1 SV=4	3425	134761	201	149	69	59	8667	1	1	1	544.24	1629.69	3	1629.69	0	1	27.06	0.0049	K	CSGMLYDQDRVDR	T	Oxidation (M)	0.0001000000000.0	F80TXA20.2931.2931.3
5	O75339	Cartilage intermediate layer protein 1 OS=Homo sapiens GN=CILP PE=1 SV=4	3425	134761	201	149	69	59	8729	1	1	1	546.27	1635.78	3	1635.78	0	1	33.48	0.0059	R	KLQQHQAGEYFCK	A			m84cxa20.2770.2770.3
5	O75339	Cartilage intermediate layer protein 1 OS=Homo sapiens GN=CILP PE=1 SV=4	3425	134761	201	149	69	59	8730	1	1	1	546.27	1635.78	3	1635.78	0	1	29.57	0.014	R	KLQQHQAGEYFCK	A			f69cxa20.2399.2399.3
5	O75339	Cartilage intermediate layer protein 1 OS=Homo sapiens GN=CILP PE=1 SV=4	3425	134761	201	149	69	59	9135	1	1	1	557.97	1670.88	3	1670.88	0	0	21.93	0.079	K	FNPNAIGVPQPYLNK	L			2_F80CXA20_2.5946.5946.3
5	O75339	Cartilage intermediate layer protein 1 OS=Homo sapiens GN=CILP PE=1 SV=4	3425	134761	201	149	69	59	9136	1	1	1	557.97	1670.88	3	1670.88	0	0	19.77	0.13	K	FNPNAIGVPQPYLNK	L			f69cxa20_100930142853.5370.5370.3
5	O75339	Cartilage intermediate layer protein 1 OS=Homo sapiens GN=CILP PE=1 SV=4	3425	134761	201	149	69	59	9137	1	1	1	836.45	1670.88	2	1670.88	0	0	52.93	6.3e-05	K	FNPNAIGVPQPYLNK	L			2_F80CXA20_2.5932.5932.2
5	O75339	Cartilage intermediate layer protein 1 OS=Homo sapiens GN=CILP PE=1 SV=4	3425	134761	201	149	69	59	9138	1	1	1	836.45	1670.88	2	1670.88	0	0	50.48	0.00011	K	FNPNAIGVPQPYLNK	L			2_F80TXA20.5989.5989.2
5	O75339	Cartilage intermediate layer protein 1 OS=Homo sapiens GN=CILP PE=1 SV=4	3425	134761	201	149	69	59	9395	1	1	1	565.63	1693.87	3	1693.87	0	1	20.56	0.096	R	EIQCSGYTLPTKVAK	E			F80TXA20.4183.4183.3
5	O75339	Cartilage intermediate layer protein 1 OS=Homo sapiens GN=CILP PE=1 SV=4	3425	134761	201	149	69	59	9396	2	1	1	565.63	1693.87	3	1693.87	0	1	13.29	0.51	R	EIQCSGYTLPTKVAK	E			F80TXB20.4216.4216.3
5	O75339	Cartilage intermediate layer protein 1 OS=Homo sapiens GN=CILP PE=1 SV=4	3425	134761	201	149	69	59	9397	1	1	1	847.94	1693.87	2	1693.87	0	1	49.75	0.00013	R	EIQCSGYTLPTKVAK	E			F80TXB20.4221.4221.2
5	O75339	Cartilage intermediate layer protein 1 OS=Homo sapiens GN=CILP PE=1 SV=4	3425	134761	201	149	69	59	9398	1	1	1	847.94	1693.87	2	1693.87	0	1	44.29	0.00046	R	EIQCSGYTLPTKVAK	E			2_F80TXA20.4278.4278.2
5	O75339	Cartilage intermediate layer protein 1 OS=Homo sapiens GN=CILP PE=1 SV=4	3425	134761	201	149	69	59	9930	1	1	1	583.95	1748.82	3	1748.82	0	1	49.53	0.00012	R	DRDQPNVSAACLEFK	C			m84cxa20.4769.4769.3
5	O75339	Cartilage intermediate layer protein 1 OS=Homo sapiens GN=CILP PE=1 SV=4	3425	134761	201	149	69	59	9931	1	1	1	583.95	1748.82	3	1748.82	0	1	46	0.00027	R	DRDQPNVSAACLEFK	C			f69cxa20.4367.4367.3
5	O75339	Cartilage intermediate layer protein 1 OS=Homo sapiens GN=CILP PE=1 SV=4	3425	134761	201	149	69	59	9932	1	1	1	875.42	1748.82	2	1748.82	0	1	67.81	1.8e-06	R	DRDQPNVSAACLEFK	C			2_F80CXA20_2.4997.4997.2
5	O75339	Cartilage intermediate layer protein 1 OS=Homo sapiens GN=CILP PE=1 SV=4	3425	134761	201	149	69	59	9933	1	1	1	875.42	1748.82	2	1748.82	0	1	75.55	3e-07	R	DRDQPNVSAACLEFK	C			f69cxb20_100930171645.4466.4466.2
5	O75339	Cartilage intermediate layer protein 1 OS=Homo sapiens GN=CILP PE=1 SV=4	3425	134761	201	149	69	59	10106	1	1	1	883.89	1765.78	2	1765.77	0	1	58.28	8.1e-06	R	DAVQNCCGISKTEER	E			2_F80TXA20.2489.2489.2
5	O75339	Cartilage intermediate layer protein 1 OS=Homo sapiens GN=CILP PE=1 SV=4	3425	134761	201	149	69	59	10107	1	1	1	883.89	1765.78	2	1765.77	0	1	61.24	4.1e-06	R	DAVQNCCGISKTEER	E			f69cxb20_100930171645.2181.2181.2
5	O75339	Cartilage intermediate layer protein 1 OS=Homo sapiens GN=CILP PE=1 SV=4	3425	134761	201	149	69	59	10108	1	1	1	589.6	1765.78	3	1765.77	0	1	42.06	0.00032	R	DAVQNCCGISKTEER	E			2_F80CXA20_1.2459.2459.3
5	O75339	Cartilage intermediate layer protein 1 OS=Homo sapiens GN=CILP PE=1 SV=4	3425	134761	201	149	69	59	10109	1	1	1	589.6	1765.78	3	1765.77	0	1	28.81	0.0068	R	DAVQNCCGISKTEER	E			f69cxa20.2022.2022.3
5	O75339	Cartilage intermediate layer protein 1 OS=Homo sapiens GN=CILP PE=1 SV=4	3425	134761	201	149	69	59	11958	1	1	1	646.67	1936.99	3	1936.99	0	1	34.69	0.0046	R	IMKSNVGVALTFNCVER	Q			2_F80CXA20_2.5740.5740.3
5	O75339	Cartilage intermediate layer protein 1 OS=Homo sapiens GN=CILP PE=1 SV=4	3425	134761	201	149	69	59	11959	1	1	1	646.67	1936.99	3	1936.99	0	1	36.12	0.0033	R	IMKSNVGVALTFNCVER	Q			2_F80CXA20_1.5737.5737.3
5	O75339	Cartilage intermediate layer protein 1 OS=Homo sapiens GN=CILP PE=1 SV=4	3425	134761	201	149	69	59	12096	1	1	1	977.47	1952.93	2	1952.93	0	0	33.2	0.0059	R	TTDWTPAGSTGQVVHGSPR	E			m84cxa20.3831.3831.2
5	O75339	Cartilage intermediate layer protein 1 OS=Homo sapiens GN=CILP PE=1 SV=4	3425	134761	201	149	69	59	12097	1	1	1	977.47	1952.93	2	1952.93	0	0	59.35	1.4e-05	R	TTDWTPAGSTGQVVHGSPR	E			F80TXA20.3974.3974.2
5	O75339	Cartilage intermediate layer protein 1 OS=Homo sapiens GN=CILP PE=1 SV=4	3425	134761	201	149	69	59	12098	1	1	1	651.99	1952.94	3	1952.93	0	0	19.42	0.15	R	TTDWTPAGSTGQVVHGSPR	E			f69cxa20_100930142853.3505.3505.3
5	O75339	Cartilage intermediate layer protein 1 OS=Homo sapiens GN=CILP PE=1 SV=4	3425	134761	201	149	69	59	12099	1	1	1	651.99	1952.94	3	1952.93	0	0	12.78	0.68	R	TTDWTPAGSTGQVVHGSPR	E			m84cxa20.3805.3805.3
5	O75339	Cartilage intermediate layer protein 1 OS=Homo sapiens GN=CILP PE=1 SV=4	3425	134761	201	149	69	59	13681	1	1	1	1068.5	2134.98	2	2134.98	0	0	68.9	1.2e-06	K	LWSLNPDTGLWEEEGDFK	F			F80TXB20.7753.7753.2
5	O75339	Cartilage intermediate layer protein 1 OS=Homo sapiens GN=CILP PE=1 SV=4	3425	134761	201	149	69	59	13682	1	1	1	1068.5	2134.98	2	2134.98	0	0	90.23	8.7e-09	K	LWSLNPDTGLWEEEGDFK	F			2_F80CXA20_2.7708.7708.2
5	O75339	Cartilage intermediate layer protein 1 OS=Homo sapiens GN=CILP PE=1 SV=4	3425	134761	201	149	69	59	13683	1	1	1	712.67	2134.99	3	2134.98	0	0	43	0.00051	K	LWSLNPDTGLWEEEGDFK	F			F80TXB20.7756.7756.3
5	O75339	Cartilage intermediate layer protein 1 OS=Homo sapiens GN=CILP PE=1 SV=4	3425	134761	201	149	69	59	13684	1	1	1	712.67	2134.99	3	2134.98	0	0	45.75	0.00027	K	LWSLNPDTGLWEEEGDFK	F			2_F80TXB20.7674.7674.3
5	O75339	Cartilage intermediate layer protein 1 OS=Homo sapiens GN=CILP PE=1 SV=4	3425	134761	201	149	69	59	14332	1	1	1	1109.59	2217.17	2	2217.17	0	1	57.06	1.4e-05	K	FNPNAIGVPQPYLNKLNYR	R			F80TXB20.6321.6321.2
5	O75339	Cartilage intermediate layer protein 1 OS=Homo sapiens GN=CILP PE=1 SV=4	3425	134761	201	149	69	59	14333	1	1	1	1109.59	2217.17	2	2217.17	0	1	65.1	2.2e-06	K	FNPNAIGVPQPYLNKLNYR	R			F80CXA20_1.6326.6326.2
5	O75339	Cartilage intermediate layer protein 1 OS=Homo sapiens GN=CILP PE=1 SV=4	3425	134761	201	149	69	59	14334	1	1	1	740.06	2217.17	3	2217.17	0	1	25.78	0.019	K	FNPNAIGVPQPYLNKLNYR	R			F80TXA20.6288.6288.3
5	O75339	Cartilage intermediate layer protein 1 OS=Homo sapiens GN=CILP PE=1 SV=4	3425	134761	201	149	69	59	14335	1	1	1	740.06	2217.17	3	2217.17	0	1	20.56	0.064	K	FNPNAIGVPQPYLNKLNYR	R			f69cxb20.5739.5739.3
5	O75339	Cartilage intermediate layer protein 1 OS=Homo sapiens GN=CILP PE=1 SV=4	3425	134761	201	149	69	59	14477	1	1	1	560.32	2237.24	4	2237.24	0	0	22.48	0.035	R	FLPSEQIQGVVISVINLEPR	T			F80CXA20_1.8859.8859.4
5	O75339	Cartilage intermediate layer protein 1 OS=Homo sapiens GN=CILP PE=1 SV=4	3425	134761	201	149	69	59	14478	1	1	1	560.32	2237.24	4	2237.24	0	0	45.76	0.00017	R	FLPSEQIQGVVISVINLEPR	T			F80TXB20.8900.8900.4
5	O75339	Cartilage intermediate layer protein 1 OS=Homo sapiens GN=CILP PE=1 SV=4	3425	134761	201	149	69	59	14479	1	1	1	1119.63	2237.24	2	2237.24	0	0	45.7	0.00015	R	FLPSEQIQGVVISVINLEPR	T			m84txa20.8051.8051.2
5	O75339	Cartilage intermediate layer protein 1 OS=Homo sapiens GN=CILP PE=1 SV=4	3425	134761	201	149	69	59	14480	1	1	1	1119.63	2237.24	2	2237.24	0	0	70.43	4.9e-07	R	FLPSEQIQGVVISVINLEPR	T			f69cxa20_100930142853.8170.8170.2
5	O75339	Cartilage intermediate layer protein 1 OS=Homo sapiens GN=CILP PE=1 SV=4	3425	134761	201	149	69	59	14481	1	1	1	746.76	2237.24	3	2237.24	0	0	31.42	0.0038	R	FLPSEQIQGVVISVINLEPR	T			m84cxa20.8681.8681.3
5	O75339	Cartilage intermediate layer protein 1 OS=Homo sapiens GN=CILP PE=1 SV=4	3425	134761	201	149	69	59	14482	1	1	1	746.76	2237.24	3	2237.24	0	0	33.31	0.0024	R	FLPSEQIQGVVISVINLEPR	T			m84txb20.8117.8117.3
5	O75339	Cartilage intermediate layer protein 1 OS=Homo sapiens GN=CILP PE=1 SV=4	3425	134761	201	149	69	59	15584	1	1	1	798.4	2392.18	3	2392.18	0	0	65.19	2.8e-06	R	QSAFQYLQSTPAQSPAAGTVQGR	V			f69txa20.5143.5143.3
5	O75339	Cartilage intermediate layer protein 1 OS=Homo sapiens GN=CILP PE=1 SV=4	3425	134761	201	149	69	59	15585	1	1	1	798.4	2392.18	3	2392.18	0	0	56.14	2.2e-05	R	QSAFQYLQSTPAQSPAAGTVQGR	V			f69cxa20.4907.4907.3
5	O75339	Cartilage intermediate layer protein 1 OS=Homo sapiens GN=CILP PE=1 SV=4	3425	134761	201	149	69	59	15586	1	1	1	1197.1	2392.18	2	2392.18	0	0	46.67	0.00021	R	QSAFQYLQSTPAQSPAAGTVQGR	V			F80CXA20_2.5566.5566.2
5	O75339	Cartilage intermediate layer protein 1 OS=Homo sapiens GN=CILP PE=1 SV=4	3425	134761	201	149	69	59	15587	1	1	1	1197.1	2392.18	2	2392.18	0	0	52.57	5.5e-05	R	QSAFQYLQSTPAQSPAAGTVQGR	V			2_F80CXA20_1.5577.5577.2
5	O75339	Cartilage intermediate layer protein 1 OS=Homo sapiens GN=CILP PE=1 SV=4	3425	134761	201	149	69	59	16842	1	1	1	870.81	2609.42	3	2609.42	0	1	38.91	0.00044	R	SERFLPSEQIQGVVISVINLEPR	T			F80TXA20.8561.8561.3
5	O75339	Cartilage intermediate layer protein 1 OS=Homo sapiens GN=CILP PE=1 SV=4	3425	134761	201	149	69	59	16843	1	1	1	870.81	2609.42	3	2609.42	0	1	50.53	3.1e-05	R	SERFLPSEQIQGVVISVINLEPR	T			F80CXA20_1.8478.8478.3
5	O75339	Cartilage intermediate layer protein 1 OS=Homo sapiens GN=CILP PE=1 SV=4	3425	134761	201	149	69	59	17088	1	1	1	1342.7	2683.39	2	2683.39	0.01	0	33.3	0.003	K	VAQLIVIASDETPCNPVPESYLIR	L			F80TXB20.7593.7593.2
5	O75339	Cartilage intermediate layer protein 1 OS=Homo sapiens GN=CILP PE=1 SV=4	3425	134761	201	149	69	59	17557	1	1	1	937.44	2809.3	3	2809.3	0	1	18.88	0.11	K	LWSLNPDTGLWEEEGDFKFENQR	R			f69cxb20_100930171645.6942.6942.3
5	O75339	Cartilage intermediate layer protein 1 OS=Homo sapiens GN=CILP PE=1 SV=4	3425	134761	201	149	69	59	17558	1	1	1	937.44	2809.3	3	2809.3	0	1	48.36	0.00012	K	LWSLNPDTGLWEEEGDFKFENQR	R			F80CXA20_1.7555.7555.3
5	O75339	Cartilage intermediate layer protein 1 OS=Homo sapiens GN=CILP PE=1 SV=4	3425	134761	201	149	69	59	17630	1	1	1	944.82	2831.44	3	2831.43	0	1	41.5	0.00057	R	QSAFQYLQSTPAQSPAAGTVQGRVPSR	R			F80CXA20_1.5425.5425.3
5	O75339	Cartilage intermediate layer protein 1 OS=Homo sapiens GN=CILP PE=1 SV=4	3425	134761	201	149	69	59	17631	1	1	1	944.82	2831.44	3	2831.43	0	1	78.55	1.1e-07	R	QSAFQYLQSTPAQSPAAGTVQGRVPSR	R			2_F80TXA20.5461.5461.3
5	O75339	Cartilage intermediate layer protein 1 OS=Homo sapiens GN=CILP PE=1 SV=4	3425	134761	201	149	69	59	18573	1	1	1	778.43	3109.69	4	3109.69	0	1	38.37	0.00041	R	FLPSEQIQGVVISVINLEPRTGFLSNPR	A			F80CXA20_2.8800.8800.4
5	O75339	Cartilage intermediate layer protein 1 OS=Homo sapiens GN=CILP PE=1 SV=4	3425	134761	201	149	69	59	18574	1	1	1	778.43	3109.69	4	3109.69	0	1	51.41	2.1e-05	R	FLPSEQIQGVVISVINLEPRTGFLSNPR	A			F80CXA20_1.8888.8888.4
5	O75339	Cartilage intermediate layer protein 1 OS=Homo sapiens GN=CILP PE=1 SV=4	3425	134761	201	149	69	59	18575	1	1	1	1037.57	3109.69	3	3109.69	0	1	69.73	2.9e-07	R	FLPSEQIQGVVISVINLEPRTGFLSNPR	A			F80CXA20_1.8878.8878.3
5	O75339	Cartilage intermediate layer protein 1 OS=Homo sapiens GN=CILP PE=1 SV=4	3425	134761	201	149	69	59	18576	1	1	1	1037.57	3109.69	3	3109.69	0	1	46.06	6.7e-05	R	FLPSEQIQGVVISVINLEPRTGFLSNPR	A			2_F80CXA20_2.8829.8829.3
5	O75339	Cartilage intermediate layer protein 1 OS=Homo sapiens GN=CILP PE=1 SV=4	3425	134761	201	149	69	59	18939	1	1	1	810.41	3237.59	4	3237.59	0	0	14.27	0.36	K	TAFQISMAKPRPNSAEESNGPIYAFENLR	A			f69cxb20.6217.6217.4
5	O75339	Cartilage intermediate layer protein 1 OS=Homo sapiens GN=CILP PE=1 SV=4	3425	134761	201	149	69	59	18940	1	1	1	810.41	3237.59	4	3237.59	0	0	20.21	0.091	K	TAFQISMAKPRPNSAEESNGPIYAFENLR	A			f69cxa20_100930142853.6262.6262.4
5	O75339	Cartilage intermediate layer protein 1 OS=Homo sapiens GN=CILP PE=1 SV=4	3425	134761	201	149	69	59	18941	1	1	1	1080.21	3237.6	3	3237.59	0.01	0	48.59	0.00013	K	TAFQISMAKPRPNSAEESNGPIYAFENLR	A			2_F80CXA20_1.6772.6772.3
5	O75339	Cartilage intermediate layer protein 1 OS=Homo sapiens GN=CILP PE=1 SV=4	3425	134761	201	149	69	59	18942	1	1	1	1080.21	3237.6	3	3237.59	0.01	0	64.55	3.3e-06	K	TAFQISMAKPRPNSAEESNGPIYAFENLR	A			F80TXA20.6773.6773.3
5	O75339	Cartilage intermediate layer protein 1 OS=Homo sapiens GN=CILP PE=1 SV=4	3425	134761	201	149	69	59	18989	1	1	1	814.41	3253.6	4	3253.58	0.02	0	6.89	1.6	K	TAFQISMAKPRPNSAEESNGPIYAFENLR	A	Oxidation (M)	0.00000010000000000000000000000.0	F80TXA20.6465.6465.4
5	O75339	Cartilage intermediate layer protein 1 OS=Homo sapiens GN=CILP PE=1 SV=4	3425	134761	201	149	69	59	18990	1	1	1	814.41	3253.6	4	3253.58	0.02	0	23.27	0.037	K	TAFQISMAKPRPNSAEESNGPIYAFENLR	A	Oxidation (M)	0.00000010000000000000000000000.0	F80TXB20.6476.6476.4
5	O75339	Cartilage intermediate layer protein 1 OS=Homo sapiens GN=CILP PE=1 SV=4	3425	134761	201	149	69	59	19273	1	1	1	1122.9	3365.68	3	3365.68	0	1	30.7	0.0059	K	KTAFQISMAKPRPNSAEESNGPIYAFENLR	A			2_F80CXA20_1.6413.6413.3
5	O75339	Cartilage intermediate layer protein 1 OS=Homo sapiens GN=CILP PE=1 SV=4	3425	134761	201	149	69	59	19274	1	1	1	1122.9	3365.68	3	3365.68	0	1	45.09	0.00021	K	KTAFQISMAKPRPNSAEESNGPIYAFENLR	A			2_F80TXA20.6446.6446.3
5	O75339	Cartilage intermediate layer protein 1 OS=Homo sapiens GN=CILP PE=1 SV=4	3425	134761	201	149	69	59	19275	1	1	1	674.14	3365.68	5	3365.68	0	1	10.46	0.66	K	KTAFQISMAKPRPNSAEESNGPIYAFENLR	A			F80CXA20_2.6330.6330.5
5	O75339	Cartilage intermediate layer protein 1 OS=Homo sapiens GN=CILP PE=1 SV=4	3425	134761	201	149	69	59	19276	1	1	1	674.14	3365.68	5	3365.68	0	1	16.14	0.18	K	KTAFQISMAKPRPNSAEESNGPIYAFENLR	A			F80TXB20.6385.6385.5
5	O75339	Cartilage intermediate layer protein 1 OS=Homo sapiens GN=CILP PE=1 SV=4	3425	134761	201	149	69	59	19277	1	1	1	842.43	3365.68	4	3365.68	0	1	19.03	0.091	K	KTAFQISMAKPRPNSAEESNGPIYAFENLR	A			2_F80CXA20_1.6388.6388.4
5	O75339	Cartilage intermediate layer protein 1 OS=Homo sapiens GN=CILP PE=1 SV=4	3425	134761	201	149	69	59	19278	1	1	1	842.43	3365.68	4	3365.68	0	1	35.88	0.0019	K	KTAFQISMAKPRPNSAEESNGPIYAFENLR	A			F80TXB20.6381.6381.4
5	O75339	Cartilage intermediate layer protein 1 OS=Homo sapiens GN=CILP PE=1 SV=4	3425	134761	201	149	69	59	19329	1	1	1	846.43	3381.68	4	3381.68	0.01	1	14.92	0.17	K	KTAFQISMAKPRPNSAEESNGPIYAFENLR	A	Oxidation (M)	0.000000010000000000000000000000.0	F80CXA20_2.6058.6058.4
5	O75339	Cartilage intermediate layer protein 1 OS=Homo sapiens GN=CILP PE=1 SV=4	3425	134761	201	149	69	59	21228	2	1	1	1611.74	4832.21	3	4832.21	0	0	0.9	1.2	R	FDSVITGPNGACVPAFCDDQSPDAYSAYVLASLAGEELQAVESSPK	F			f69cxb20.8409.8409.3
5	O75339	Cartilage intermediate layer protein 1 OS=Homo sapiens GN=CILP PE=1 SV=4	3425	134761	201	149	69	59	21229	1	1	1	1611.74	4832.21	3	4832.21	0	0	1.74	1	R	FDSVITGPNGACVPAFCDDQSPDAYSAYVLASLAGEELQAVESSPK	F			2_F80TXA20.9149.9149.3
5	O75339	Cartilage intermediate layer protein 1 OS=Homo sapiens GN=CILP PE=1 SV=4	3425	134761	201	149	69	59	21231	1	1	1	1209.06	4832.21	4	4832.21	0	0	15.3	0.044	R	FDSVITGPNGACVPAFCDDQSPDAYSAYVLASLAGEELQAVESSPK	F			f69cxb20_100930171645.8394.8394.4
5	O75339	Cartilage intermediate layer protein 1 OS=Homo sapiens GN=CILP PE=1 SV=4	3425	134761	201	149	69	59	21501	1	1	1	1326.62	5302.45	4	5302.45	0	1	17.64	0.036	R	AWGRFDSVITGPNGACVPAFCDDQSPDAYSAYVLASLAGEELQAVESSPK	F			F80TXA20.9059.9059.4
5	O75339	Cartilage intermediate layer protein 1 OS=Homo sapiens GN=CILP PE=1 SV=4	3425	134761	201	149	69	59	21502	1	1	1	1326.62	5302.45	4	5302.45	0	1	34.84	0.00069	R	AWGRFDSVITGPNGACVPAFCDDQSPDAYSAYVLASLAGEELQAVESSPK	F			2_F80CXA20_1.8935.8935.4
[truncated: 4,257 more rows]
